# Supplementary material for: Co-expression analysis reveals interpretable gene modules controlled by trans-acting genetic variants
Source: eLife. 2020 Sep 3;9:e58705. doi: 10.7554/eLife.58705 (PMC7470823; doi:10.7554/eLife.58705)
Supplement: Supplementary file 1. [file elife-58705-supp1.xlsx]

## Sheet: Supplementary_file1
trans_lead	rs_id	GRCh37	chr	position	nr_snps	cs_rs_ids	nr_modules	closest_genes	gp_link	qtl_group	qtl_label	nr_trans_in_module	bonferroni	byfdr10	integrated	separate	ICA	PLIER	PEER	WGCNA	funcExplorer	trait	trait_name
chr1_14348601_G_A	rs6429651	chr1:14675096	1	14348601	1	rs6429651	1	KAZN; KAZN PRDM2 PDPN TMEM51 LRRC38	https://biit.cs.ut.ee/gplink/l/1JXLCjZRQL	CL_0002057_LPS_24h	monocyte LPS_24h	180	FALSE	FALSE	TRUE	FALSE	FALSE	TRUE	FALSE	FALSE	FALSE	NA	NA
chr1_165264420_G_A	rs34745858	chr1:165233657	1	165264420	14	rs16841801; rs16841803; rs35043164; rs34745858; rs34732875; rs59911715; rs12562556; rs12563462; rs78989175; rs35695490; rs59094364; ; rs35980722	2	LMX1A; LMX1A RXRG LRRC52 PBX1 MGST3	https://biit.cs.ut.ee/gplink/l/MN0GuwyGQ-	CL_0000624_naive	CD4+ T cell naive	5;4	FALSE	FALSE	FALSE	TRUE	FALSE	FALSE	FALSE	FALSE	TRUE	NA	NA
chr1_20695138_G_A		chr1:21021631	1	20695138	1		1	KIF17; KIF17 SH2D5 DDOST PINK1 HP1BP3	https://biit.cs.ut.ee/gplink/l/Aqw1QMmyTc	CL_0000236_naive	B cell naive	8	FALSE	FALSE	TRUE	FALSE	FALSE	FALSE	FALSE	TRUE	FALSE	NA	NA
chr1_225949764_A_G		chr1:226137464	1	225949764	6	rs2038393; rs72755002; ; rs56150046	1	; LEFTY2 PYCR2 SDE2 LEFTY1 TMEM63A	https://biit.cs.ut.ee/gplink/l/LeIA8N3eS5	CL_0000775_naive	neutrophil naive	3	FALSE	FALSE	FALSE	TRUE	FALSE	FALSE	FALSE	FALSE	TRUE	NA	NA
chr1_240734551_T_A	rs79875984	chr1:240897851	1	240734551	1	rs79875984	1	; RGS7 GREM2 FMN2 FH KMO	https://biit.cs.ut.ee/gplink/l/OD3L9yGwTm	CL_0002057_LPS_2h	monocyte LPS_2h	5	FALSE	FALSE	FALSE	TRUE	FALSE	FALSE	FALSE	FALSE	TRUE	NA	NA
chr1_36586360_A_G	rs11589597	chr1:37051961	1	36586360	5	rs6696336; rs1997965; rs1076774; rs743013; rs11589597	1	; CSF3R MRPS15 OSCP1 LSM10 STK40	https://biit.cs.ut.ee/gplink/l/9vdIrpsCSp	CL_0000233_naive	platelet naive	12	FALSE	FALSE	TRUE	FALSE	FALSE	FALSE	FALSE	FALSE	TRUE	NA	NA
chr1_36592753_T_C	rs4653204	chr1:37058354	1	36592753	5	rs4653202; rs4653204; ; rs1076775; rs910524	3	; CSF3R MRPS15 OSCP1 LSM10 GRIK3	https://biit.cs.ut.ee/gplink/l/NVsuF-nST1	CL_0000233_naive	platelet naive	39;178;148	FALSE	FALSE	TRUE	FALSE	FALSE	TRUE	TRUE	FALSE	TRUE	NA	NA
chr1_37990219_G_C	rs4360494	chr1:38455891	1	37990219	46	; rs17465420; rs28605759; rs28730330; rs28435150; rs28570969; rs2127645; rs2170169; rs28760325; rs28645205; rs28391281; rs28673728; rs28380108; rs11485595; rs17531077; rs17465651; rs58893352; rs10562404; rs67524417; rs28428561; rs35993262; rs7555461; rs141707261; rs565082621; rs10890238; rs11210825; rs11210866; rs11363172; rs397863386; rs12138115; rs12024166; rs12044531; rs4360494; rs150361750; r…	4	SF3A3; SF3A3 FHL3 UTP11 INPP5B MTF1	https://biit.cs.ut.ee/gplink/l/LVs7259uSq	CL_0002057_LPS_24h	monocyte LPS_24h	5;9;689;17	FALSE	TRUE	TRUE	TRUE	FALSE	FALSE	TRUE	FALSE	TRUE	27863252-GCST004621-EFO_0005192; CAD_Howson_2017; CAD_Nikpay_2015; MI_Nikpay_2015	Red cell distribution width;NA
chr1_50554388_T_G	rs1278638	chr1:51020060	1	50554388	2	rs1278638; rs34024738	1	FAF1; FAF1 DMRTA2 ELAVL4 CDKN2C AGBL4	https://biit.cs.ut.ee/gplink/l/Qsig_b9FQX	CL_0000625_naive	CD8+ T cell naive	41	FALSE	FALSE	TRUE	FALSE	FALSE	FALSE	FALSE	TRUE	FALSE	NA	NA
chr1_57325505_C_T		chr1:57791177	1	57325505	1		1	DAB1; DAB1 C8B C8A FYB2 PRKAA2	https://biit.cs.ut.ee/gplink/l/iMW28hK1Rv	CL_0000775_naive	neutrophil naive	50	FALSE	FALSE	TRUE	FALSE	FALSE	FALSE	TRUE	FALSE	FALSE	NA	NA
chr1_77003531_A_G		chr1:77469216	1	77003531	1		3	ST6GALNAC5; ST6GALNAC5 PIGK AK5 ST6GALNAC3	https://biit.cs.ut.ee/gplink/l/k5WJJ3mhTr	CL_0000624_naive	CD4+ T cell naive	5;9;8	FALSE	TRUE	TRUE	TRUE	FALSE	FALSE	FALSE	TRUE	TRUE	NA	NA
chr1_80742792_T_C		chr1:81208477	1	80742792	2	rs1774870;	1	; ADGRL2 ADGRL4 IFI44 IFI44L PTGFR	https://biit.cs.ut.ee/gplink/l/iq-2cGSLR5	CL_0002057_LPS_2h	monocyte LPS_2h	16	FALSE	FALSE	FALSE	TRUE	FALSE	FALSE	FALSE	TRUE	FALSE	NA	NA
chr1_8216449_T_C	rs402660	chr1:8276509	1	8216449	25	rs402660; rs384055; rs478128; rs72635726; rs12143970; rs12143975; rs12143976; rs653660; ; rs497887; rs653837; rs2004504; rs10864338; rs10864339; rs10864340; rs373906; rs412616; rs67812240; rs637566; rs411619; rs35833327; rs405488; rs139289571	1	; SLC45A1 RERE ERRFI1 PARK7 TNFRSF9	https://biit.cs.ut.ee/gplink/l/leEPJJU5St	CL_0000236_naive	B cell naive	2	FALSE	FALSE	TRUE	FALSE	FALSE	TRUE	FALSE	FALSE	FALSE	NA	NA
chr1_9273214_G_T	rs916383	chr1:9333273	1	9273214	9	; rs916383; rs916382; rs2311048; rs72641828; rs763181; rs113111563; rs139415304; rs528604238	1	; H6PD SPSB1 GPR157 SLC2A5 SLC2A7	https://biit.cs.ut.ee/gplink/l/uJajctdlQH	CL_0000624_naive	CD4+ T cell naive	117	FALSE	FALSE	FALSE	TRUE	FALSE	FALSE	FALSE	TRUE	FALSE	NA	NA
chr1_97406289_T_A	rs201629458	chr1:97871845	1	97406289	16	rs117967363; rs115262804; ; rs74682146; rs78987067; rs75932131; rs74105139; rs11165854; rs4638160; rs149216568; rs183554993; rs76012985; rs148185926; rs201629458; rs79593470	1	DPYD; DPYD PTBP2 SNX7 PLPPR5 PLPPR4	https://biit.cs.ut.ee/gplink/l/EAXDNBbWTW	CL_0002057_LPS_2h	monocyte LPS_2h	17	FALSE	FALSE	TRUE	FALSE	FALSE	FALSE	FALSE	TRUE	FALSE	NA	NA
chr10_113154982_AT_A	rs67268457; rs547862468; rs59885014	chr10:114914741	10	113154982	1	rs67268457; rs547862468; rs59885014	1	TCF7L2; TCF7L2 VTI1A HABP2 NRAP CASP7	https://biit.cs.ut.ee/gplink/l/T011AWlvQr	CL_0000624_naive	CD4+ T cell naive	9	FALSE	FALSE	TRUE	FALSE	FALSE	TRUE	FALSE	FALSE	FALSE	NA	NA
chr10_114375651_G_T	rs2475245	chr10:116135410	10	114375651	8	; rs12263086; rs7896823; rs11196715; rs11196716; rs2475245	1	AFAP1L2; AFAP1L2 ABLIM1 VWA2 TDRD1 CCDC186	https://biit.cs.ut.ee/gplink/l/GnlQtd9LTU	CL_0002057_IFNg_24h	monocyte IFNg_24h	69	FALSE	FALSE	TRUE	FALSE	FALSE	TRUE	FALSE	FALSE	FALSE	NA	NA
chr10_4960010_G_A		chr10:5002202	10	4960010	35	; rs2904800; rs2904803; rs11252853; rs12773163; rs7074155; rs3925947; rs12264914; rs4445550; rs7076886; rs1468084; rs1468085; rs12264439; rs7083246; rs11330324; rs796067069; rs12263706; rs12263850; rs10595294; rs530566556; rs7916500; rs3890593; rs3923936; rs7089378; rs10128236; rs1139139; rs6601884; rs11252857; rs373198056; rs34246984	1	; AKR1C1 AKR1C2 AKR1C3 AKR1E2 AKR1C4	https://biit.cs.ut.ee/gplink/l/7vvRfQEUTQ	CL_0002057_LPS_24h	monocyte LPS_24h	8	FALSE	FALSE	FALSE	TRUE	FALSE	FALSE	FALSE	FALSE	TRUE	NA	NA
chr10_89980514_A_G	rs7094046	chr10:91740271	10	89980514	52	; rs67801980; rs143948108; rs72820722; rs71306846; rs398038543; rs2763332; rs2798620; rs1113984; rs1777955; rs1748493; rs1748492; rs1748495; rs2798616; rs34729473; rs796608733; rs1111716; rs1274142; rs1274140; rs1274139; rs1296513; rs1274129; rs1274131; rs1274132; rs1274135; rs2763324; rs4572053; rs4272711; rs2763333; rs1936222; rs7912852; rs7089587; rs1954410; rs2000285; rs1343365; rs1936217; rs…	1	; KIF20B PANK1 SLC16A12 IFIT5 LIPA	https://biit.cs.ut.ee/gplink/l/KhbJ62qhQ6	CL_0000625_naive	CD8+ T cell naive	178	FALSE	FALSE	FALSE	TRUE	FALSE	FALSE	TRUE	FALSE	FALSE	NA	NA
chr10_95253548_C_G	rs34883883	chr10:97013305	10	95253548	130	; rs139311383; rs72818651; rs72818652; rs72818656; rs570534055; rs72818659; rs72818661; rs11596096; rs56408997; rs55753924; rs72818668; rs139065552; rs72818673; rs113526640; rs72818679; rs72818680; rs11188148; rs11572174; rs10509681; rs11572169; rs11572168; rs11188153; rs11188154; rs11572150; rs11572128; rs56028148; rs11572116; rs11572107; rs11591385; rs117530387; rs142308077; rs111328885; rs1157…	2	PDLIM1; PDLIM1 ACSM6 SORBS1 CYP2C8 CYP2C9	https://biit.cs.ut.ee/gplink/l/WnEyuXmwRK	CL_0002057_LPS_2h, CL_0002057_LPS_24h	monocyte LPS_2h, monocyte LPS_24h	58;48	FALSE	FALSE	TRUE	FALSE	FALSE	TRUE	TRUE	FALSE	FALSE	NA	NA
chr11_117272469_G_C		chr11:117143185	11	117272469	35	; rs621858; rs637065; rs552176; rs540922; rs507880; rs2509211; rs619772; rs558590; rs573956; rs35378775; rs495438; rs492151; rs644215; rs493139; rs7925044; rs505045; rs7083	1	RNF214; BACE1 RNF214 PCSK7 CEP164 TAGLN	https://biit.cs.ut.ee/gplink/l/ofEVt6EhSf	CL_0000236_naive	B cell naive	3	FALSE	TRUE	TRUE	FALSE	FALSE	FALSE	FALSE	FALSE	TRUE	NA	NA
chr11_19768624_A_G	rs2018011	chr11:19790170	11	19768624	13	rs1425232; rs1425233; rs11025246; rs11819786; rs12797612; rs11025250; rs11025251; rs2004082; rs2018011; rs2004083; ; rs1425237; rs7125626	1	NAV2; NAV2 DBX1 E2F8 CSRP3 ZDHHC13	https://biit.cs.ut.ee/gplink/l/xe34pY3yTO	CL_0000625_naive	CD8+ T cell naive	6	FALSE	FALSE	FALSE	TRUE	FALSE	FALSE	FALSE	FALSE	TRUE	NA	NA
chr11_23512699_G_A	rs12577626	chr11:23534245	11	23512699	9	rs2090637; rs2090636; ; rs7926648; rs7940770; rs1850823; rs5790345; rs769656217; rs1850822; rs12577626	1	; CCDC179 SVIP GAS2 FANCF LUZP2	https://biit.cs.ut.ee/gplink/l/oeu5y5aASL	CL_0002057_LPS_24h	monocyte LPS_24h	4	FALSE	TRUE	TRUE	FALSE	FALSE	FALSE	FALSE	FALSE	TRUE	NA	NA
chr11_25724633_G_C	rs7118385	chr11:25746180	11	25724633	7	rs117009745; rs144894995; rs73435204; rs73435211; ; rs58613092; rs7118385	1	; ANO3 LUZP2 MUC15 SLC5A12 BBOX1	https://biit.cs.ut.ee/gplink/l/xa3rrgjmQx	CL_0000236_naive	B cell naive	7	FALSE	TRUE	TRUE	FALSE	FALSE	FALSE	FALSE	FALSE	TRUE	NA	NA
chr11_56352114_TTTTATTTATTTATTTATTTA_T	rs148864693	chr11:56119590	11	56352114	35	rs79800180; rs11227763; rs148864693; rs34434887; rs75959672; rs11228329; ; rs635236; rs679395; rs597727; rs2511144; rs633866; rs11228630; rs11228653; rs76797979; rs142980059; rs529507556; rs602158; rs548178; rs473503; rs559457; rs692748; rs552409; rs483365; rs550500; rs492536; rs1792503; rs599917; rs500127; rs560518	1	; OR8J1 OR8K1 OR8K3 OR8H1 OR5R1	https://biit.cs.ut.ee/gplink/l/nSDastv-Qy	CL_0000625_naive	CD8+ T cell naive	15	FALSE	FALSE	TRUE	FALSE	FALSE	FALSE	FALSE	TRUE	FALSE	NA	NA
chr11_56876110_C_T	rs1938746	chr11:56643586	11	56876110	5	rs1938746; rs4938844; rs4938845; ; rs72911880	1	; OR5AK2 OR9G4 OR9G1 OR5AR1 OR5AP2	https://biit.cs.ut.ee/gplink/l/_5CLBHhvR5	CL_0000625_naive	CD8+ T cell naive	16	FALSE	FALSE	TRUE	FALSE	FALSE	FALSE	FALSE	TRUE	FALSE	NA	NA
chr11_62141200_G_A	rs1675123	chr11:61908672	11	62141200	1	rs1675123	1	INCENP; INCENP SCGB1D1 SCGB2A1 SCGB1D2 SCGB2A2	https://biit.cs.ut.ee/gplink/l/gX4yOerUTu	CL_0002057_IFNg_24h	monocyte IFNg_24h	9	FALSE	TRUE	TRUE	FALSE	FALSE	FALSE	FALSE	FALSE	TRUE	NA	NA
chr11_72722182_G_GGA	rs10675016; rs771006617; rs35983220	chr11:72433227	11	72722182	1	rs10675016; rs771006617; rs35983220	1	ARAP1; STARD10 ARAP1 PDE2A ATG16L2 FCHSD2	https://biit.cs.ut.ee/gplink/l/izh9_bvIQS	CL_0000233_naive	platelet naive	12	FALSE	FALSE	TRUE	FALSE	FALSE	FALSE	FALSE	TRUE	FALSE	NA	NA
chr11_74543826_G_T	rs627824	chr11:74254871	11	74543826	88	rs138160477; rs57498039; rs602936; rs617343; ; rs1280207; rs7928160; rs1655475; rs56241926; rs666125; rs34619402; rs796577053; rs1787109; rs1433968; rs594143; rs56010330; rs143042351; rs370929316; rs10793090; rs11532106; rs397946034; rs34369791; rs598525; rs598926; rs2570616; rs1783197; rs113030291; rs642932; rs1791491; rs661781; rs645655; rs660057; rs660107; rs660123; rs3017113; rs2916310; rs602…	1	POLD3; POLD3 KCNE3 PGM2L1 CHRDL2 RNF169	https://biit.cs.ut.ee/gplink/l/MMQ4O0JsS7	CL_0002057_LPS_24h	monocyte LPS_24h	17	FALSE	TRUE	TRUE	FALSE	FALSE	FALSE	FALSE	FALSE	TRUE	NA	NA
chr11_80588608_G_A	rs1880694	chr11:80299652	11	80588608	1	rs1880694	1	; TENM4 NARS2 FAM181B GAB2 PRCP	https://biit.cs.ut.ee/gplink/l/-Py85FlKQG	CL_0002057_LPS_24h	monocyte LPS_24h	11	FALSE	FALSE	FALSE	TRUE	TRUE	FALSE	FALSE	FALSE	FALSE	NA	NA
chr12_109073339_T_C	rs7967182	chr12:109511144	12	109073339	11	rs4296113; rs57688181; rs528105920; rs398021009; ; rs7967182; rs6606740; rs11069042	1	USP30; USP30 ALKBH2 UNG ACACB SVOP	https://biit.cs.ut.ee/gplink/l/-eQCaOKmQ9	CL_0000775_naive	neutrophil naive	16	FALSE	FALSE	TRUE	FALSE	FALSE	FALSE	TRUE	FALSE	FALSE	NA	NA
chr12_115701683_C_T	rs4766772	chr12:116139488	12	115701683	6	rs10735089; rs1386038; rs1386037; rs4766772; rs11067733; rs4767354	1	; MED13L MAP1LC3B2 C12orf49 TBX3 RNFT2	https://biit.cs.ut.ee/gplink/l/fEG6lB-2TE	CL_0002057_naive	monocyte naive	2	FALSE	TRUE	TRUE	FALSE	FALSE	FALSE	FALSE	FALSE	TRUE	NA	NA
chr12_124919185_G_A	rs34291586	chr12:125403731	12	124919185	2	rs34291586; rs67888996	1	; UBC DHX37 SCARB1 BRI3BP AACS	https://biit.cs.ut.ee/gplink/l/4aNyecymTa	CL_0002057_LPS_24h	monocyte LPS_24h	47	FALSE	FALSE	TRUE	FALSE	TRUE	FALSE	FALSE	FALSE	FALSE	NA	NA
chr12_125874670_A_C	rs6489028	chr12:126359216	12	125874670	2	rs6489028;	1	; TMEM132B AACS BRI3BP DHX37 UBC	https://biit.cs.ut.ee/gplink/l/t5z7IMb7S5	CL_0000624_naive	CD4+ T cell naive	17	FALSE	FALSE	FALSE	TRUE	FALSE	FALSE	FALSE	FALSE	TRUE	NA	NA
chr12_27451502_A_G		chr12:27604435	12	27451502	30	rs2306074; rs1271061; rs776193; rs722135; ; rs1256964; rs1257230; rs1256965; rs610756; rs1443858; rs1443859; rs684342; rs1150932; rs1150933; rs1150935; rs306598; rs306597; rs306596; rs306595; rs306594; rs306593; rs216699; rs306628; rs569503075; rs773394838; rs306630; rs6487610	1	; SMCO2 ARNTL2 PPFIBP1 STK38L REP15	https://biit.cs.ut.ee/gplink/l/T0DSyotORs	CL_0002057_LPS_24h	monocyte LPS_24h	33	FALSE	FALSE	TRUE	FALSE	FALSE	FALSE	FALSE	TRUE	FALSE	NA	NA
chr12_29637087_C_A	rs10843456	chr12:29790020	12	29637087	1	rs10843456	1	TMTC1; TMTC1 OVCH1 ERGIC2 FAR2 IPO8	https://biit.cs.ut.ee/gplink/l/gSMT-3eGR2	CL_0000625_naive	CD8+ T cell naive	7	FALSE	FALSE	FALSE	TRUE	FALSE	FALSE	FALSE	FALSE	TRUE	NA	NA
chr12_32716242_T_TG		chr12:32869176	12	32716242	71	rs41276674; rs12372569; rs12372562; rs12322199; rs12322258; rs11052131; rs11052132; ; rs10844274; rs61450261; rs11052137; rs11052139; rs11052140; rs10844276; rs10844277; rs12578138; rs34088006; rs4931032; rs36036043; rs397851179; rs7309751; rs11052143; rs7309894; rs12368935; rs11052144; rs7313294; rs11052146; rs7303018; rs7132486; rs10771977; rs6488074; rs66895109; rs117695367; rs12304039; rs3600…	3	DNM1L; YARS2 DNM1L FGD4 PKP2 BICD1	https://biit.cs.ut.ee/gplink/l/P90_q5MIRX	CL_0002057_LPS_24h	monocyte LPS_24h	892;11;11	FALSE	FALSE	FALSE	TRUE	FALSE	FALSE	TRUE	FALSE	TRUE	NA	NA
chr12_3679237_T_C	rs56290125	chr12:3788403	12	3679237	39	rs3803135; rs56290125; rs17836269; rs17836273; ; rs57335133; rs17780624; rs56012913; rs61908564; rs73245982; rs61908566; rs12580734; rs12580735; rs61908568; rs61908569; rs17780653; rs17836295; rs9788233; rs17836297; rs12582749; rs56180512; rs55680128; rs7308072; rs58381361; rs7305574; rs149117663; rs75532126; rs736746; rs61414382; rs7305628; rs554793478; rs58581988; rs12580813; rs57555399	1	CRACR2A; CRACR2A PRMT8 PARP11 TSPAN9 CCND2	https://biit.cs.ut.ee/gplink/l/5neIQLyYST	CL_0002057_IFNg_24h	monocyte IFNg_24h	4	FALSE	TRUE	TRUE	FALSE	FALSE	FALSE	FALSE	FALSE	TRUE	NA	NA
chr12_67593746_TAAAAAA_T	rs374667499; rs746146444; rs542605347	chr12:67987526	12	67593746	1	rs374667499; rs746146444; rs542605347	1	; DYRK2 CAND1 GRIP1 IFNG IL26	https://biit.cs.ut.ee/gplink/l/njw0ooxRTZ	CL_0000775_naive	neutrophil naive	101	FALSE	FALSE	TRUE	FALSE	FALSE	FALSE	TRUE	FALSE	FALSE	NA	NA
chr12_69344099_A_G		chr12:69737879	12	69344099	170	rs6581886; ; rs763852772; rs71436096; rs55814516; rs6581887; rs11615712; rs10784770; rs10748126; rs10784771; rs373513434; rs35481107; rs7135981; rs11177566; rs11290008; rs398020033; rs2305642; rs5798929; rs398020034; rs1350166; rs34391463; rs397811090; rs370574308; rs10784773; rs2305641; rs66846565; rs3214839; rs398020036; rs7135092; rs1463335; rs575627; rs998022; rs138867102; rs56370505; rs47611…	75	; LYZ YEATS4 CPSF6 FRS2 CCT2	https://biit.cs.ut.ee/gplink/l/gRMSZHYYSI	CL_0002057_naive, CL_0002057_LPS_2h, CL_0002057_IFNg_24h, CL_0002057_LPS_24h	monocyte naive, monocyte IFNg_24h, monocyte LPS_2h, monocyte LPS_24h	100;16;108;204;22;52;117;53;122;6;52;80;74;63;108;43;139;104;149;98;157;51;106;75;72;53;276;76;50;105;51;176;209;25;113;182;125;78;187;35;54;113;186;245;104;19;161;284;234;218;9;214;25;212;111;127;95;268;152;101;197;42;190;137;334;141;117;112;100;9;79;115;135;166;222	TRUE	TRUE	TRUE	TRUE	TRUE	TRUE	TRUE	TRUE	TRUE	27863252-GCST004610-EFO_0004308; 27863252-GCST004613-EFO_0004833; 27863252-GCST004614-EFO_0007987; 27863252-GCST004620-EFO_0004833; 27863252-GCST004626-EFO_0007988; 27863252-GCST004629-EFO_0004833; 27863252-GCST004632-EFO_0007993; 27863252-GCST004633-EFO_0007990	White blood cell count;Sum neutrophil eosinophil counts;Granulocyte count;Sum basophil neutrophil counts;Myeloid white cell count;Neutrophil count;Lymphocyte percentage of white cells;Neutrophil percentage of white cells
chr12_71913836_A_G		chr12:72307616	12	71913836	17	; rs146970034; rs56334049; rs2016880; rs7969244; rs1035778; rs11178973; rs5799056; rs796585319; rs6582063; rs7953250; rs6582066; rs7962236; rs6582068; rs7294969	2	TBC1D15; TBC1D15 TPH2 RAB21 TRHDE TMEM19	https://biit.cs.ut.ee/gplink/l/icEbpY_ARz	CL_0000625_naive	CD8+ T cell naive	8;7	FALSE	FALSE	FALSE	TRUE	FALSE	FALSE	FALSE	TRUE	TRUE	NA	NA
chr12_96341344_C_T	rs562341818	chr12:96735122	12	96341344	41	rs55997706; rs73223927; rs370019986; rs17737199; rs7310421; rs4762293; rs6538704; rs7294784; rs56178148; rs142772497; ; rs7314551; rs144637231; rs142809001; rs73227396; rs371955187; rs55650621; rs7138597; rs7134030; rs7134580; rs1982221; rs562341818; rs1899044; rs141043350; rs73229022; rs56023660; rs4762297; rs7958080; rs7973968; rs142404742; rs373362649; rs17313099; rs73235115; rs3858658; rs1965…	3	CDK17; CDK17 ELK3 CFAP54 LTA4H HAL	https://biit.cs.ut.ee/gplink/l/dC-saiXGTz	CL_0002057_IFNg_24h	monocyte IFNg_24h	70;59;108	FALSE	TRUE	TRUE	TRUE	TRUE	TRUE	FALSE	FALSE	FALSE	NA	NA
chr13_109044506_G_A	rs12856298	chr13:109696854	13	109044506	3	rs35056212; rs12856298;	1	MYO16; MYO16 IRS2 TNFSF13B ABHD13 LIG4	https://biit.cs.ut.ee/gplink/l/CfuB9lNHQF	CL_0000236_naive	B cell naive	13	FALSE	TRUE	TRUE	FALSE	FALSE	FALSE	FALSE	FALSE	TRUE	NA	NA
chr13_112444498_G_T	rs4907714	chr13:113098812	13	112444498	4	rs7337551; rs913451; rs4907714; rs7324495	1	; SPACA7 TUBGCP3 ATP11A MCF2L F7	https://biit.cs.ut.ee/gplink/l/gcwF6X3rSF	CL_0000624_naive	CD4+ T cell naive	419	FALSE	FALSE	FALSE	TRUE	TRUE	FALSE	FALSE	FALSE	FALSE	NA	NA
chr13_113228695_A_C	rs72665221	chr13:113883009	13	113228695	2	rs72665221; rs9549725	1	CUL4A; PCID2 CUL4A PROZ F10 GRTP1	https://biit.cs.ut.ee/gplink/l/6WEMwonhRi	CL_0000775_naive	neutrophil naive	6	FALSE	FALSE	FALSE	TRUE	FALSE	FALSE	FALSE	FALSE	TRUE	MCH; MCV	NA
chr13_21346592_G_C	rs7328466	chr13:21920731	13	21346592	1	rs7328466	1	; ZDHHC20 MICU2 MRPL57 SKA3 SAP18	https://biit.cs.ut.ee/gplink/l/0yw28CwHQ7	CL_0002057_LPS_2h	monocyte LPS_2h	28	FALSE	FALSE	TRUE	FALSE	FALSE	FALSE	TRUE	FALSE	FALSE	NA	NA
chr13_48867533_T_C	rs9535100	chr13:49441669	13	48867533	13	; rs8001483; rs553141899; rs779175569; rs71076051; rs9535100; rs9535104; rs34738768; rs397716923; rs7998800; rs17462760; rs532641; rs34536291	1	; FNDC3A CYSLTR2 RB1 RCBTB2 MLNR	https://biit.cs.ut.ee/gplink/l/QYOe52IQRY	CL_0002057_LPS_2h	monocyte LPS_2h	7	FALSE	FALSE	FALSE	TRUE	FALSE	TRUE	FALSE	FALSE	FALSE	NA	NA
chr13_51432448_AATTT_A	rs145562838; rs776314801; rs763363321	chr13:52006584	13	51432448	14	rs117986217; rs145562838; rs776314801; rs763363321; rs75362486; rs78264001; rs77486858; rs78076711; ; rs74084881; rs74084882; rs76325882; rs140900604; rs139329340; rs74084886; rs117189426	1	INTS6; INTS6 SERPINE3 FAM124A WDFY2	https://biit.cs.ut.ee/gplink/l/TkmYmN7gT-	CL_0000624_naive	CD4+ T cell naive	2	FALSE	FALSE	FALSE	TRUE	FALSE	FALSE	FALSE	FALSE	TRUE	NA	NA
chr13_53558741_C_G	rs7326133	chr13:54132876	13	53558741	1	rs7326133	1	; OLFM4 PCDH8 CNMD SUGT1 HNRNPA1L2	https://biit.cs.ut.ee/gplink/l/3jjsra82SY	CL_0000233_naive	platelet naive	3	FALSE	FALSE	TRUE	FALSE	FALSE	FALSE	FALSE	FALSE	TRUE	NA	NA
chr14_21126994_C_A	rs4981356	chr14:21595153	14	21126994	7	rs60611772; rs112426866; rs10129576; ; rs4981356; rs72671131; rs201199407	2	; OR5AU1 ZNF219 TMEM253 ARHGEF40 NDRG2	https://biit.cs.ut.ee/gplink/l/7VkSufl4Q0	CL_0002057_naive	monocyte naive	8;11	FALSE	TRUE	TRUE	TRUE	FALSE	FALSE	FALSE	TRUE	TRUE	NA	NA
chr14_30343667_A_G	rs74540455	chr14:30812873	14	30343667	1	rs74540455	1	; PRKD1 G2E3 SCFD1 COCH STRN3	https://biit.cs.ut.ee/gplink/l/GmHtMcq1TW	CL_0002057_naive	monocyte naive	10	FALSE	FALSE	TRUE	FALSE	FALSE	FALSE	FALSE	TRUE	FALSE	NA	NA
chr14_35924927_G_A	rs12882436	chr14:36394133	14	35924927	4	rs148657641; rs369219211; rs67983506; rs10151938; rs12882436; rs11626914	1	BRMS1L; BRMS1L RALGAPA1 MBIP INSM2 NFKBIA	https://biit.cs.ut.ee/gplink/l/HvGNIXKaTC	CL_0000236_naive	B cell naive	2	FALSE	TRUE	TRUE	FALSE	FALSE	FALSE	FALSE	FALSE	TRUE	NA	NA
chr14_44455083_TA_T	rs71108647	chr14:44924286	14	44455083	24	rs34496397; rs397739456; ; rs12436606; rs4906538; rs35909466; rs71108647; rs66918776; rs1121595; rs35734952; rs397852607; rs34669579; rs67216669; rs4906544; rs12432703; rs12436005; rs67764097; rs4906545; rs452450; rs398241; rs140168504; rs72288846; rs447028; rs112932959	1	; FSCB C14orf28 KLHL28 TOGARAM1 PRPF39	https://biit.cs.ut.ee/gplink/l/arZ4Gk9CT8	CL_0000624_naive	CD4+ T cell naive	3	FALSE	FALSE	TRUE	FALSE	FALSE	FALSE	FALSE	FALSE	TRUE	NA	NA
chr14_52350480_CG_CGG		chr14:52817198	14	52350480	19	rs708511; rs697811; ; rs708518; rs708519; rs1254568; rs1254565; rs74961871; rs7147567; rs76057195; rs12431695; rs17253026; rs79710021; rs74860213; rs75293060; rs34846549; rs397852145; rs17831748	1	; PTGER2 PTGDR TXNDC16 GPR137C NID2	https://biit.cs.ut.ee/gplink/l/xLshGAFzS1	CL_0000775_naive	neutrophil naive	4	FALSE	FALSE	FALSE	TRUE	FALSE	TRUE	FALSE	FALSE	FALSE	NA	NA
chr14_54634260_C_T	rs2004470	chr14:55100978	14	54634260	1	rs2004470	1	SAMD4A; SAMD4A CGRRF1 GMFB CNIH1 GCH1	https://biit.cs.ut.ee/gplink/l/gJc3GGlzQR	CL_0002057_LPS_2h	monocyte LPS_2h	10	FALSE	FALSE	TRUE	FALSE	FALSE	FALSE	FALSE	FALSE	TRUE	NA	NA
chr14_74335301_T_C		chr14:74802004	14	74335301	4	; rs764048734; rs397701464	1	VRTN; VRTN ABCD4 SYNDIG1L VSX2 LIN52	https://biit.cs.ut.ee/gplink/l/vU8HBoOMTn	CL_0002057_IFNg_24h	monocyte IFNg_24h	37	FALSE	FALSE	FALSE	TRUE	FALSE	TRUE	FALSE	FALSE	FALSE	NA	NA
chr14_88030463_T_C	rs73314714	chr14:88496807	14	88030463	3	rs73314714;	1	; GPR65 GALC KCNK10 SPATA7 PTPN21	https://biit.cs.ut.ee/gplink/l/ZNFKWnyLRm	CL_0002057_LPS_2h	monocyte LPS_2h	12	FALSE	TRUE	TRUE	FALSE	FALSE	FALSE	FALSE	FALSE	TRUE	NA	NA
chr14_92570659_C_CA		chr14:93037004	14	92570659	1		1	RIN3; RIN3 SLC24A4 LGMN GOLGA5 CHGA	https://biit.cs.ut.ee/gplink/l/yIVdOagMRg	CL_0000236_naive	B cell naive	16	FALSE	FALSE	TRUE	FALSE	FALSE	TRUE	FALSE	FALSE	FALSE	NA	NA
chr14_94740969_T_A	rs11845152	chr14:95207306	14	94740969	9	rs72698831; rs17827129; rs72698833; rs78750934; rs113920416; rs8016591; ; rs11845152; rs72698858	1	; GSC SERPINA3 SERPINA5 SERPINA4 SERPINA12	https://biit.cs.ut.ee/gplink/l/SZt-jAkBSz	CL_0000625_naive	CD8+ T cell naive	12	FALSE	FALSE	FALSE	TRUE	TRUE	FALSE	FALSE	FALSE	FALSE	NA	NA
chr15_100108173_C_T	rs56077082	chr15:100648378	15	100108173	29	rs35418412; ; rs8042860; rs34357020; rs6598301; rs34476939; rs8036944; rs34467733; rs397733075; rs34452981; rs34571113; rs34152537; rs56077082; rs55743504; rs12905554; rs34829964; rs57545798; rs72253769; rs35850597; rs397854111; rs35038809; rs34088945; rs12902069; rs35858708; rs12906927; rs34915352; rs34468829	1	ADAMTS17; ADAMTS17 CERS3 LYSMD4 MEF2A LINS1	https://biit.cs.ut.ee/gplink/l/huZREXNZS0	CL_0000625_naive	CD8+ T cell naive	1	FALSE	FALSE	FALSE	TRUE	FALSE	TRUE	FALSE	FALSE	FALSE	NA	NA
chr15_26767696_A_C	rs3212334	chr15:27012843	15	26767696	9	rs3212334; ; rs8179184; rs61996884; rs1491147622; rs114365549; rs61996886; rs55769456; rs61996906	1	GABRB3; GABRA5 GABRB3 GABRG3 ATP10A OCA2	https://biit.cs.ut.ee/gplink/l/aav9r6O7TR	CL_0000233_naive	platelet naive	21	FALSE	FALSE	TRUE	FALSE	FALSE	FALSE	FALSE	FALSE	TRUE	NA	NA
chr15_32957397_C_G		chr15:33249598	15	32957397	1		4	FMN1; FMN1 GREM1 SCG5 ARHGAP11A GOLGA8N	https://biit.cs.ut.ee/gplink/l/q_daVz4BQb	CL_0000775_naive	neutrophil naive	332;117;9;34	FALSE	FALSE	TRUE	TRUE	FALSE	TRUE	FALSE	TRUE	TRUE	NA	NA
chr15_36752984_G_A	rs7174237	chr15:37045185	15	36752984	17	rs149868769; ; rs16963944; rs72706795; rs4335735; rs4456452; rs139738188; rs72706799; rs76226755; rs72708607; rs77667694; rs72708611; rs7174237; rs72708612; rs35121140; rs78450335; rs72708614	1	C15orf41; C15orf41 MEIS2 TMCO5A DPH6 SPRED1	https://biit.cs.ut.ee/gplink/l/YL3QZ6LzTG	CL_0002057_LPS_24h	monocyte LPS_24h	12	TRUE	TRUE	FALSE	TRUE	FALSE	TRUE	FALSE	FALSE	FALSE	NA	NA
chr15_37689491_T_C	rs74967443	chr15:37981692	15	37689491	42	rs78578384; rs73396026; ; rs78439229; rs62048171; rs16965467; rs74006749; rs61467732; rs16965468; rs73396040; rs11287627; rs8034083; rs73396048; rs4924188; rs73396051; rs11857321; rs8042309; rs74967443; rs34414243; rs397737295; rs11857635; rs1498419; rs8023882; rs10633249; rs397746985; rs1498418; rs77817967; rs10629172; rs28718992; rs28641046; rs56111166; rs397801136; rs73382205; rs73382207; rs73…	1	; TMCO5A SPRED1 MEIS2 FAM98B RASGRP1	https://biit.cs.ut.ee/gplink/l/rSkpe8LpTe	CL_0002057_LPS_2h	monocyte LPS_2h	5	FALSE	FALSE	TRUE	FALSE	TRUE	FALSE	FALSE	FALSE	FALSE	NA	NA
chr15_38056885_C_CA		chr15:38349086	15	38056885	2	; rs140980005; rs145856902	1	; TMCO5A SPRED1 FAM98B RASGRP1 C15orf53	https://biit.cs.ut.ee/gplink/l/4qaZMVf8Sq	CL_0000624_naive	CD4+ T cell naive	252	FALSE	FALSE	TRUE	FALSE	FALSE	FALSE	TRUE	FALSE	FALSE	NA	NA
chr15_62636845_A_T	rs66576035	chr15:62929044	15	62636845	9	rs35397688; ; rs7181710; rs7182961; rs7180961; rs66576035; rs11630238	1	TLN2; TLN2 TPM1 C2CD4B LACTB RPS27L	https://biit.cs.ut.ee/gplink/l/feVB-TkLTV	CL_0000625_naive	CD8+ T cell naive	75	FALSE	FALSE	FALSE	TRUE	FALSE	FALSE	FALSE	TRUE	FALSE	NA	NA
chr15_71236096_G_T		chr15:71528435	15	71236096	6	rs62017769; rs11413853; rs1372828; rs2048792; rs4777345;	1	THSD4; CT62 THSD4 LRRC49 THAP10 LARP6	https://biit.cs.ut.ee/gplink/l/BzJgvQKWQH	CL_0002057_naive	monocyte naive	437	FALSE	FALSE	FALSE	TRUE	FALSE	FALSE	TRUE	FALSE	FALSE	NA	NA
chr15_72112972_T_C	rs7172158	chr15:72405313	15	72112972	125	rs2415120; ; rs12898728; rs12898868; rs4777466; rs4511483; rs4526973; rs144106224; rs1469697076; rs7496582; rs7496771; rs12439494; rs28650442; rs66692529; rs12912771; rs12050794; rs2306576; rs2415126; rs9302260; rs62023343; rs10546981; rs776338633; rs72241503; rs6494975; rs11633167; rs397751818; rs2128112; rs7173626; rs3784313; rs2415128; rs59799401; rs769357555; rs28717020; rs2929513; rs1552133;…	1	MYO9A; SENP8 MYO9A GRAMD2A PKM PARP6	https://biit.cs.ut.ee/gplink/l/s15ptH0_Ro	CL_0000625_naive	CD8+ T cell naive	9	FALSE	FALSE	TRUE	FALSE	FALSE	FALSE	TRUE	FALSE	FALSE	NA	NA
chr16_12158544_G_A	rs937964	chr16:12252401	16	12158544	1	rs937964	1	SNX29; SNX29 NPIPB2 TNFRSF17 RSL1D1 ZC3H7A	https://biit.cs.ut.ee/gplink/l/EjJxXWGxRI	CL_0002057_LPS_24h	monocyte LPS_24h	3	FALSE	FALSE	FALSE	TRUE	FALSE	FALSE	FALSE	FALSE	TRUE	NA	NA
chr16_3328831_G_C	rs4786403	chr16:3378831	16	3328831	8	rs4786403; ; rs79515689; rs146585489; rs59975153; rs11860437	1	; ZNF75A TIGD7 OR2C1 ZNF263 ZSCAN32	https://biit.cs.ut.ee/gplink/l/OX0glokqRJ	CL_0002057_LPS_24h	monocyte LPS_24h	4	FALSE	TRUE	TRUE	FALSE	FALSE	FALSE	FALSE	FALSE	TRUE	NA	NA
chr16_53433130_TAAAG_T	rs145659919	chr16:53467042	16	53433130	39	rs141646804; rs112494684; rs7189233; rs62048490; ; rs6499609; rs145659919; rs16952242; rs72801817; rs72801818; rs139253972; rs72801821; rs149745705; rs759637381; rs62048520; rs66521736; rs869277674; rs7189726; rs11540358; rs72801843; rs7184800; rs8044205; rs72801853; rs72801854; rs8057808; rs60420081; rs7194519; rs7189819; rs62048544; rs3809634	1	; RBL2 AKTIP CHD9 RPGRIP1L FTO	https://biit.cs.ut.ee/gplink/l/f7hogjy1Rv	CL_0000624_naive	CD4+ T cell naive	191	FALSE	FALSE	FALSE	TRUE	FALSE	FALSE	TRUE	FALSE	FALSE	NA	NA
chr16_57946800_G_T		chr16:57980704	16	57946800	2	rs116864900;	1	CNGB1; CNGB1 TEPP ZNF319 USB1 MMP15	https://biit.cs.ut.ee/gplink/l/FYyfkNnjQS	CL_0002057_IFNg_24h	monocyte IFNg_24h	16	FALSE	FALSE	TRUE	FALSE	FALSE	FALSE	FALSE	TRUE	FALSE	NA	NA
chr16_6538604_G_C	rs62015468	chr16:6588605	16	6538604	1	rs62015468	3	RBFOX1; RBFOX1 EEF2KMT ALG1 C16orf89 NAGPA	https://biit.cs.ut.ee/gplink/l/XYct3F6vQt	CL_0002057_IFNg_24h	monocyte IFNg_24h	178;190;71	FALSE	FALSE	TRUE	TRUE	TRUE	TRUE	FALSE	FALSE	TRUE	NA	NA
chr16_69417011_C_G	rs59777746	chr16:69450914	16	69417011	18	rs62057896; ; rs79709662; rs62057897; rs147975258; rs12149537; rs59777746; rs61279492; rs397689008; rs75301012; rs545363262; rs1491373224; rs60103543; rs55952516; rs397932604; rs57569666; rs62050128; rs62050129; rs75553671; rs59651448; rs55945180	1	; CYB5B TERF2 TMED6 NIP7	https://biit.cs.ut.ee/gplink/l/KxXf4PqkSR	CL_0000625_naive	CD8+ T cell naive	25	FALSE	FALSE	TRUE	FALSE	FALSE	FALSE	FALSE	TRUE	FALSE	NA	NA
chr16_7067951_AT_A	rs556490599	chr16:7117952	16	7067951	1	rs556490599	1	RBFOX1; RBFOX1 TMEM114 METTL22 ABAT TMEM186	https://biit.cs.ut.ee/gplink/l/3y3TU6sERw	CL_0000624_naive	CD4+ T cell naive	541	FALSE	FALSE	FALSE	TRUE	FALSE	TRUE	FALSE	FALSE	FALSE	NA	NA
chr17_4210465_T_C	rs74900424	chr17:4113760	17	4210465	2	rs74900424; rs11078491	1	ANKFY1; CYB5D2 ANKFY1 UBE2G1 ZZEF1 SPNS3	https://biit.cs.ut.ee/gplink/l/DWwLyhIqTD	CL_0000624_naive	CD4+ T cell naive	10	FALSE	FALSE	FALSE	TRUE	FALSE	FALSE	FALSE	TRUE	FALSE	NA	NA
chr17_49489893_C_T	rs72837237	chr17:47567255	17	49489893	2	rs72837236; rs72837237	1	; NGFR PHB NXPH3 SPOP ZNF652	https://biit.cs.ut.ee/gplink/l/YVvAG2rUR5	CL_0000233_naive	platelet naive	1	FALSE	FALSE	TRUE	FALSE	FALSE	FALSE	FALSE	FALSE	TRUE	NA	NA
chr17_5918381_GTTTTTTTTTT_G	rs202046787; rs540296483	chr17:5821701	17	5918381	1	rs202046787; rs540296483	1	; WSCD1 NLRP1 MIS12 DERL2 DHX33	https://biit.cs.ut.ee/gplink/l/qwUz2_gySE	CL_0002057_IFNg_24h	monocyte IFNg_24h	3	FALSE	FALSE	TRUE	FALSE	FALSE	FALSE	FALSE	FALSE	TRUE	NA	NA
chr17_65394032_G_A	rs16962220	chr17:63390150	17	65394032	7	rs16962220; ; rs8075041; rs1003407; rs8081549; rs9889481; rs9916038	1	; AXIN2 RGS9 CEP112 GNA13 SMURF2	https://biit.cs.ut.ee/gplink/l/c_zXaUItRw	CL_0002057_IFNg_24h	monocyte IFNg_24h	20	FALSE	TRUE	TRUE	FALSE	FALSE	FALSE	TRUE	FALSE	FALSE	NA	NA
chr17_73125542_G_A	rs62071580	chr17:71121681	17	73125542	4	rs17836677; rs7219202; rs62071578; rs62071580	1	; SLC39A11 SSTR2 COG1 C17orf80 CPSF4L	https://biit.cs.ut.ee/gplink/l/FUY62c3wT6	CL_0000625_naive	CD8+ T cell naive	4	FALSE	FALSE	FALSE	TRUE	FALSE	FALSE	FALSE	FALSE	TRUE	NA	NA
chr17_7753805_G_A	rs2111834	chr17:7657123	17	7753805	16	rs11867551; rs62062609; ; rs62062610; rs62062611; rs62062612; rs112008397; rs75880616; rs62062613; rs56332843; rs58657621; rs62062616; rs2111834; rs62062618; rs62062623	1	DNAH2; DNAH2 EFNB3 WRAP53 TP53 KDM6B	https://biit.cs.ut.ee/gplink/l/9R1dH7dXRx	CL_0002057_LPS_2h	monocyte LPS_2h	36	FALSE	FALSE	TRUE	FALSE	FALSE	FALSE	FALSE	TRUE	FALSE	NA	NA
chr18_11410683_C_T	rs12965218	chr18:11410682	18	11410683	12	rs12965218; rs12327363; ; rs1893231; rs2865807; rs3043578; rs10502409; rs7233659; rs7233688; rs7234648; rs7234139	1	; SLC35G4 PIEZO2 GNAL CHMP1B MPPE1	https://biit.cs.ut.ee/gplink/l/O3BgrxqmRw	CL_0000775_naive	neutrophil naive	9	FALSE	FALSE	FALSE	TRUE	FALSE	FALSE	FALSE	FALSE	TRUE	NA	NA
chr18_331052_G_GT		chr18:331052	18	331052	1		1	COLEC12; COLEC12 THOC1 USP14 CETN1 CLUL1	https://biit.cs.ut.ee/gplink/l/7JYRo7-ESw	CL_0000233_naive	platelet naive	268	FALSE	FALSE	FALSE	TRUE	FALSE	TRUE	FALSE	FALSE	FALSE	NA	NA
chr18_61739860_T_C	rs11659168	chr18:59407093	18	61739860	1	rs11659168	1	; RNF152 PIGN CDH20 KIAA1468 TNFRSF11A	https://biit.cs.ut.ee/gplink/l/yfXdeHSrTb	CL_0000624_naive	CD4+ T cell naive	4	FALSE	FALSE	TRUE	FALSE	FALSE	TRUE	FALSE	FALSE	FALSE	NA	NA
chr19_11275710_A_G		chr19:11386386	19	11275710	22	; rs4804584; rs144364005; rs59219524; rs379909; rs375323; rs78611326; rs58360828; rs390313; rs62131088	1	; DOCK6 TSPAN16 ANGPTL8 RAB3D TMEM205	https://biit.cs.ut.ee/gplink/l/4SeBbDEbTK	CL_0000625_naive	CD8+ T cell naive	15	FALSE	FALSE	TRUE	FALSE	FALSE	TRUE	FALSE	FALSE	FALSE	NA	NA
chr19_21975910_AC_A	rs57233797	chr19:22158712	19	21975910	130	rs812673; rs34620362; ; rs2522093; rs2666457; rs2522092; rs36107625; rs397692312; rs2097733; rs2522089; rs2214296; rs113841299; rs2359809; rs71178796; rs2522105; rs138217248; rs576199031; rs541984739; rs1849003; rs2666438; rs7253518; rs6511303; rs58270321; rs8108093; rs1064170; rs10412331; rs2158107; rs58974981; rs35935777; rs2359810; rs8108957; rs2007506; rs10419899; rs1987975; rs1987974; rs5723…	2	ZNF208; ZNF208 ZNF257 ZNF43 ZNF676 ZNF100	https://biit.cs.ut.ee/gplink/l/FvAtpiDJSM	CL_0000236_naive	B cell naive	39;44	FALSE	FALSE	TRUE	TRUE	TRUE	FALSE	FALSE	FALSE	FALSE	NA	NA
chr19_33637316_C_A		chr19:34128222	19	33637316	2	; rs17834186	1	CHST8; CHST8 PEPD KCTD15 CEBPG CEBPA	https://biit.cs.ut.ee/gplink/l/q7D4TM8OT5	CL_0000625_naive	CD8+ T cell naive	5	FALSE	TRUE	TRUE	FALSE	FALSE	FALSE	FALSE	FALSE	TRUE	NA	NA
chr19_34840532_C_T	rs11084789	chr19:35331436	19	34840532	1	rs11084789	1	; ZNF599 ZNF30 ZNF181 ZNF792 ZNF302	https://biit.cs.ut.ee/gplink/l/-ZFTvGm6QK	CL_0002057_LPS_24h	monocyte LPS_24h	60	FALSE	FALSE	TRUE	FALSE	TRUE	FALSE	FALSE	FALSE	FALSE	NA	NA
chr19_35004496_G_A	rs73038362	chr19:35495400	19	35004496	1	rs73038362	1	GRAMD1A; GRAMD1A SCN1B HPN ZNF792 ZNF30	https://biit.cs.ut.ee/gplink/l/CF6O4-88Ro	CL_0002057_LPS_24h	monocyte LPS_24h	8	FALSE	FALSE	TRUE	FALSE	FALSE	TRUE	FALSE	FALSE	FALSE	NA	NA
chr19_39881739_G_C		chr19:40372379	19	39881739	3	; rs3936363	1	FCGBP; FCGBP FBL DYRK1B PSMC4 LEUTX	https://biit.cs.ut.ee/gplink/l/KmnEqPMLRg	CL_0000233_naive	platelet naive	18	FALSE	FALSE	FALSE	TRUE	FALSE	FALSE	FALSE	TRUE	FALSE	NA	NA
chr19_51591205_G_C	rs6509555	chr19:52094458	19	51591205	7	; rs398071204; rs6509553; rs6509554; rs6509555	2	ZNF175; ZNF175 SIGLEC5 SIGLEC14 SIGLEC6 SIGLEC12	https://biit.cs.ut.ee/gplink/l/Hg-W4N-ST0	CL_0000625_naive	CD8+ T cell naive	5;111	FALSE	FALSE	TRUE	FALSE	FALSE	TRUE	FALSE	FALSE	TRUE	NA	NA
chr19_57610450_A_G	rs55633718	chr19:58121818	19	57610450	8	rs55633718; ; rs74745582; rs10403965; rs2283633; rs10414451; rs148433652	1	ZNF530; ZNF530 ZNF134 ZIK1 ZNF211 ZNF416	https://biit.cs.ut.ee/gplink/l/gRXcPCSUQU	CL_0002057_LPS_2h	monocyte LPS_2h	179	FALSE	FALSE	TRUE	FALSE	TRUE	FALSE	FALSE	FALSE	FALSE	NA	NA
chr19_791153_C_T	rs62131329	chr19:791153	19	791153	1	rs62131329	1	; PTBP1 PLPPR3 MISP AZU1 PALM	https://biit.cs.ut.ee/gplink/l/BcjTGiFQT1	CL_0000624_naive	CD4+ T cell naive	37	FALSE	FALSE	FALSE	TRUE	FALSE	FALSE	FALSE	FALSE	TRUE	NA	NA
chr2_114722281_G_A		chr2:115479858	2	114722281	19	rs13430153; rs13032740; rs1836759; rs13022000; rs7605779; ; rs13032093; rs10194063; rs17043456; rs7574829; rs200604046; rs70937302; rs13386918; rs71418517; rs10203323	3	DPP10; DPP10 ACTR3 SLC35F5 RABL2A FOXD4L1	https://biit.cs.ut.ee/gplink/l/-F7dTWTORR	CL_0000625_naive	CD8+ T cell naive	31;32;40	FALSE	FALSE	TRUE	TRUE	TRUE	TRUE	FALSE	FALSE	FALSE	NA	NA
chr2_122139324_G_A	rs531600024	chr2:122896900	2	122139324	1	rs531600024	1	; TSN NIFK CLASP1 TFCP2L1 GLI2	https://biit.cs.ut.ee/gplink/l/hyQNSnAXTS	CL_0000625_naive	CD8+ T cell naive	160	FALSE	FALSE	TRUE	FALSE	FALSE	TRUE	FALSE	FALSE	FALSE	NA	NA
chr2_124126209_G_A		chr2:124883786	2	124126209	1		1	CNTNAP5; CNTNAP5 TSN NIFK CLASP1 GYPC	https://biit.cs.ut.ee/gplink/l/V8-X1pwyRm	CL_0000775_naive	neutrophil naive	3	FALSE	FALSE	FALSE	TRUE	FALSE	FALSE	FALSE	FALSE	TRUE	NA	NA
chr2_135011557_C_T	rs13417776	chr2:135769127	2	135011557	24	rs35207259; rs72458852; rs34627854; rs141409161; rs6729579; ; rs6753639; rs16831243; rs7606415; rs7569995; rs7589411; rs13417776; rs200691672; rs781090392; rs10201646; rs10169130; rs10203840; rs13390171; rs6740541; rs12612955; rs1463137; rs16831432	2	MAP3K19; MAP3K19 RAB3GAP1 CCNT2 ACMSD ZRANB3	https://biit.cs.ut.ee/gplink/l/Ou_aROaWS5	CL_0000775_naive	neutrophil naive	2;63	FALSE	FALSE	TRUE	TRUE	FALSE	FALSE	TRUE	FALSE	TRUE	NA	NA
chr2_136865011_T_C	rs1649570	chr2:137622581	2	136865011	21	rs778198; rs778196; rs778194; rs778193; rs778214; rs1652426; rs1652427; ; rs1649538; rs1427618; rs1649567; rs1652436; rs2558102; rs2558103; rs1649570; rs1652438; rs778184; rs778182; rs778179; rs778178	1	THSD7B; THSD7B CXCR4 DARS MCM6 LCT	https://biit.cs.ut.ee/gplink/l/gdgJsF4eTi	CL_0002057_IFNg_24h	monocyte IFNg_24h	34	FALSE	FALSE	FALSE	TRUE	FALSE	FALSE	FALSE	FALSE	TRUE	NA	NA
chr2_144947450_C_T	rs368021978	chr2:145705017	2	144947450	50	rs28454238; rs397821836; rs10210406; rs10168164; rs727241; rs10201023; rs373580104; rs368021978; ; rs786236; rs4662407; rs786238; rs786240; rs149964847; rs1528187; rs1852654; rs72033010; rs786216; rs147799206; rs765526381; rs13391247; rs2165022; rs1550324; rs7589880; rs4662408; rs786261; rs786259; rs2579020; rs2697042; rs1085418; rs4662410; rs1406118; rs2697046; rs13427617; rs10928236; rs76138249…	1	; ZEB2 GTDC1 ARHGAP15 KYNU LRP1B	https://biit.cs.ut.ee/gplink/l/FEtWD-EfS5	CL_0000233_naive	platelet naive	65	FALSE	FALSE	FALSE	TRUE	FALSE	FALSE	FALSE	TRUE	FALSE	NA	NA
chr2_153635232_G_C	rs78430259	chr2:154491745	2	153635232	50	rs1940258; rs1940259; rs66887900; rs12476622; rs1940263; rs1940264; rs13427656; rs6729666; rs10469746; ; rs10221666; rs1401747; rs1401741; rs13411262; rs10197706; rs13418139; rs13421900; rs10204386; rs1961034; rs1519636; rs4664147; rs4664148; rs55929170; rs10497134; rs13392376; rs6719847; rs13428815; rs13431671; rs13403953; rs538333159; rs199954175; rs201513046; rs544413952; rs200018516; rs287070…	1	; RPRM GALNT13 ARL6IP6 PRPF40A FMNL2	https://biit.cs.ut.ee/gplink/l/2AB-gjl1Rv	CL_0000236_naive	B cell naive	12	FALSE	TRUE	TRUE	FALSE	FALSE	FALSE	FALSE	FALSE	TRUE	NA	NA
chr2_174382972_T_C	rs6743248	chr2:175247700	2	174382972	16	; rs13006423; rs6718176; rs71021692; rs397986727; rs56068956; rs4432417; rs66490663; rs71021697; rs71405202; rs77203041; rs6743248; rs1530761; rs13025758; rs7591631; rs13412443; rs10195555	1	CIR1; CIR1 SCRN3 SP9 GPR155 OLA1	https://biit.cs.ut.ee/gplink/l/55sPu_xvS2	CL_0000625_naive	CD8+ T cell naive	45	FALSE	FALSE	TRUE	FALSE	FALSE	TRUE	FALSE	FALSE	FALSE	NA	NA
chr2_183072434_C_G		chr2:183937162	2	183072434	1		1	; NCKAP1 NUP35 FRZB DNAJC10 PDE1A	https://biit.cs.ut.ee/gplink/l/GPSglnfeQT	CL_0002057_LPS_24h	monocyte LPS_24h	10	FALSE	FALSE	TRUE	FALSE	TRUE	FALSE	FALSE	FALSE	FALSE	NA	NA
chr2_184508425_A_G	rs35334414	chr2:185373152	2	184508425	1	rs35334414	1	; ZNF804A FSIP2 NUP35 NCKAP1 FRZB	https://biit.cs.ut.ee/gplink/l/VKfKxL9zQl	CL_0002057_IFNg_24h	monocyte IFNg_24h	6	FALSE	TRUE	TRUE	FALSE	FALSE	FALSE	FALSE	FALSE	TRUE	NA	NA
chr2_19044288_TA_T	rs1371454141; rs397869357	chr2:19244043	2	19044288	21	; rs1317509; rs75657930; rs75950533; rs1371454141; rs397869357; rs4666376; rs4666378; rs190873597; rs4832643; rs59030420; rs1574072; rs79444992; rs79711768; rs6712855; rs6712979; rs111279189	1	; OSR1 NT5C1B NT5C1B-RDH14 KCNS3 TTC32	https://biit.cs.ut.ee/gplink/l/sH5uDZiwTQ	CL_0002057_IFNg_24h	monocyte IFNg_24h	5	FALSE	FALSE	FALSE	TRUE	FALSE	FALSE	FALSE	FALSE	TRUE	NA	NA
chr2_195485702_C_G	rs72925754	chr2:196350426	2	195485702	1	rs72925754	1	; SLC39A10 DNAH7 STK17B HECW2 CCDC150	https://biit.cs.ut.ee/gplink/l/ecFCfWg8QF	CL_0002057_LPS_24h	monocyte LPS_24h	3	FALSE	TRUE	TRUE	FALSE	TRUE	FALSE	FALSE	FALSE	FALSE	NA	NA
chr2_222691534_A_T	rs13019436	chr2:223556253	2	222691534	10	rs1947133; rs12624245; rs12611436; ; rs61296453; rs61441860; rs34564625; rs34666618; rs13019436	1	MOGAT1; MOGAT1 FARSB SGPP2 ACSL3 KCNE4	https://biit.cs.ut.ee/gplink/l/kMBDhVRRTj	CL_0000775_naive	neutrophil naive	8	FALSE	FALSE	TRUE	FALSE	FALSE	FALSE	TRUE	FALSE	FALSE	NA	NA
chr2_229544585_G_T	rs1812059	chr2:230409301	2	229544585	11	rs1812059; rs113857349; rs11893306; rs11893229; rs199884590; rs200132583; rs2059026; rs2059028; rs60028805;	1	DNER; DNER TRIP12 PID1 FBXO36 SLC16A14	https://biit.cs.ut.ee/gplink/l/m6w-UEPjRD	CL_0002057_LPS_24h	monocyte LPS_24h	68	FALSE	FALSE	FALSE	TRUE	FALSE	FALSE	FALSE	TRUE	FALSE	NA	NA
chr2_231442313_CT_C	rs71052589; rs397988198	chr2:232307024	2	231442313	2	rs12478406; rs71052589; rs397988198	1	; NCL B3GNT7 ARMC9 NMUR1 TEX44	https://biit.cs.ut.ee/gplink/l/WSj-M_HjRV	CL_0002057_LPS_24h	monocyte LPS_24h	4	FALSE	FALSE	TRUE	FALSE	FALSE	FALSE	FALSE	FALSE	TRUE	NA	NA
chr2_235336716_GA_GAA		chr2:236245360	2	235336716	18	; rs10929124; rs12473066; rs10178264; rs10178265; rs1975116; rs10191942; rs2217538; rs2195783; rs6712169; rs10211333; rs201572249; rs372454093; rs55656215	1	; AGAP1 SH3BP4 GBX2 ARL4C ASB18	https://biit.cs.ut.ee/gplink/l/4rDchBYARz	CL_0002057_LPS_24h	monocyte LPS_24h	4	FALSE	FALSE	TRUE	FALSE	FALSE	FALSE	FALSE	FALSE	TRUE	NA	NA
chr2_24200207_G_T		chr2:24423076	2	24200207	20	rs12185638; rs4665253; rs6714652; ; rs4665256; rs397808313; rs11691212; rs10445892; rs10445893; rs7564420; rs35520052; rs11680491; rs12467912	1	FAM228A; FAM228A ITSN2 PFN4 TP53I3	https://biit.cs.ut.ee/gplink/l/fGrCObDZTN	CL_0000775_naive	neutrophil naive	26	FALSE	FALSE	FALSE	TRUE	FALSE	FALSE	FALSE	TRUE	FALSE	NA	NA
chr2_24356202_C_CA		chr2:24579071	2	24356202	1		2	ITSN2; ITSN2 NCOA1 FAM228A PFN4	https://biit.cs.ut.ee/gplink/l/ufdxIJJIQB	CL_0000625_naive	CD8+ T cell naive	82;76	FALSE	FALSE	FALSE	TRUE	TRUE	TRUE	FALSE	FALSE	FALSE	NA	NA
chr2_2515749_C_T	rs10199516	chr2:2519521	2	2515749	4	rs10199521; rs10199516; rs2668843; rs938141	1	; MYT1L EIPR1 PXDN TRAPPC12 TPO	https://biit.cs.ut.ee/gplink/l/VD2AEdclQh	CL_0000625_naive	CD8+ T cell naive	25	FALSE	FALSE	TRUE	FALSE	FALSE	FALSE	TRUE	FALSE	FALSE	NA	NA
chr2_3180579_G_A	rs76806300	chr2:3184350	2	3180579	2	rs76806300;	1	; EIPR1 TRAPPC12 ADI1 RNASEH1 RPS7	https://biit.cs.ut.ee/gplink/l/EISNDZnZRf	CL_0000236_naive	B cell naive	39	FALSE	FALSE	FALSE	TRUE	FALSE	TRUE	FALSE	FALSE	FALSE	NA	NA
chr2_35434240_A_T	rs11688880	chr2:35659306	2	35434240	1	rs11688880	1	; CRIM1 FEZ2 VIT STRN HEATR5B	https://biit.cs.ut.ee/gplink/l/o1ol1RftRr	CL_0002057_IFNg_24h	monocyte IFNg_24h	8	FALSE	FALSE	FALSE	TRUE	FALSE	FALSE	FALSE	FALSE	TRUE	NA	NA
chr2_44181781_C_G	rs10199294	chr2:44408920	2	44181781	2	rs10199294; rs76318056	1	PPM1B; PPM1B SLC3A1 PREPL CAMKMT LRPPRC	https://biit.cs.ut.ee/gplink/l/LO-ACKmqQi	CL_0000775_naive	neutrophil naive	50	FALSE	FALSE	TRUE	FALSE	TRUE	FALSE	FALSE	FALSE	FALSE	NA	NA
chr2_45750437_A_G	rs11125031	chr2:45977576	2	45750437	3	rs11125031; rs4953246; rs5830867; rs397798728	1	PRKCE; PRKCE EPAS1 TMEM247 ATP6V1E2 SIX2	https://biit.cs.ut.ee/gplink/l/hKm84ECwRj	CL_0000625_naive	CD8+ T cell naive	108	FALSE	FALSE	FALSE	TRUE	FALSE	FALSE	TRUE	FALSE	FALSE	NA	NA
chr2_46080333_T_TA	rs397947923	chr2:46307472	2	46080333	10	rs3814371; rs4953302; rs397947923; rs66716369; rs56274630; rs200592395; rs11890344; ; rs74262744; rs544906222	1	PRKCE; PRKCE EPAS1 TMEM247 ATP6V1E2 RHOQ	https://biit.cs.ut.ee/gplink/l/7GREWuzHQV	CL_0002057_naive	monocyte naive	4	FALSE	FALSE	FALSE	TRUE	FALSE	FALSE	FALSE	FALSE	TRUE	NA	NA
chr2_46268606_A_G	rs77967960	chr2:46495745	2	46268606	3	; rs77967960	1	; EPAS1 PRKCE TMEM247 ATP6V1E2 RHOQ	https://biit.cs.ut.ee/gplink/l/NWxsIULMQj	CL_0000775_naive	neutrophil naive	21	FALSE	FALSE	FALSE	TRUE	FALSE	FALSE	FALSE	FALSE	TRUE	NA	NA
chr2_54918863_G_C		chr2:55146000	2	54918863	5	; rs17346032; rs35753222; rs13390825	1	EML6; EML6 RTN4 SPTBN1 CLHC1 RPS27A	https://biit.cs.ut.ee/gplink/l/71oetDhuRt	CL_0002057_LPS_24h	monocyte LPS_24h	226	FALSE	FALSE	FALSE	TRUE	FALSE	TRUE	FALSE	FALSE	FALSE	NA	NA
chr2_57646840_T_C	rs2695615	chr2:57873975	2	57646840	52	rs1527622; rs1405824; rs4671314; rs36164559; ; rs12478874; rs820794; rs68039707; rs756542258; rs58752320; rs11125723; rs2695594; rs2695596; rs2695597; rs2695601; rs1380695; rs2612305; rs2612304; rs1460261; rs2612319; rs1350694; rs2612318; rs1380705; rs2178047; rs2612317; rs1918451; rs2695608; rs2695609; rs2612316; rs2695611; rs2695612; rs1405821; rs1405822; rs2695613; rs2612314; rs1380701; rs9886…	1	; VRK2 FANCL CCDC85A EFEMP1 PNPT1	https://biit.cs.ut.ee/gplink/l/O2HJscCsQQ	CL_0000625_naive	CD8+ T cell naive	3	FALSE	FALSE	FALSE	TRUE	FALSE	FALSE	FALSE	FALSE	TRUE	NA	NA
chr2_61277281_G_C	rs35688811	chr2:61504416	2	61277281	6	rs77445405; rs62152265; rs35688811; rs34341648; rs70963414; rs180723939;	1	USP34; USP34 C2orf74 KIAA1841 XPO1 PEX13	https://biit.cs.ut.ee/gplink/l/Bv3F-4dPT1	CL_0000624_naive	CD4+ T cell naive	2	FALSE	FALSE	TRUE	FALSE	FALSE	FALSE	FALSE	FALSE	TRUE	NA	NA
chr20_12003012_C_T	rs6109223	chr20:11983660	20	12003012	18	rs6078407; ; rs2327603; rs6109212; rs6109218; rs761319; rs2206804; rs6041029; rs35107525; rs6131290; rs6109223; rs6078430; rs4814055; rs4814056	1	; BTBD3 SPTLC3 ISM1 JAG1 SLX4IP	https://biit.cs.ut.ee/gplink/l/6nIf2eHXTW	CL_0000775_naive	neutrophil naive	59	FALSE	FALSE	TRUE	FALSE	FALSE	FALSE	TRUE	FALSE	FALSE	NA	NA
chr20_22501008_T_C	rs73087895	chr20:22481646	20	22501008	1	rs73087895	2	; FOXA2 THBD CD93 PAX1 NXT1	https://biit.cs.ut.ee/gplink/l/fFGzySA_Sx	CL_0000625_naive	CD8+ T cell naive	274;21	FALSE	FALSE	TRUE	TRUE	FALSE	FALSE	TRUE	FALSE	TRUE	NA	NA
chr20_40080805_C_T	rs6071927	chr20:38709446	20	40080805	2	rs6071927; rs35491970	1	; MAFB TOP1 DHX35 PLCG1 ZHX3	https://biit.cs.ut.ee/gplink/l/3qG93qWiQz	CL_0002057_LPS_2h	monocyte LPS_2h	144	FALSE	FALSE	FALSE	TRUE	FALSE	TRUE	FALSE	FALSE	FALSE	NA	NA
chr20_50452363_C_T	rs530527757	chr20:49068900	20	50452363	10	rs803742; rs390221; rs55862612; rs6063519; rs4374430; ; rs6020519; rs530527757; rs10659092; rs143850813; rs776599334	1	; PTPN1 RIPOR3 CEBPB PARD6B TMEM189	https://biit.cs.ut.ee/gplink/l/87ixSh3zQz	CL_0002057_naive	monocyte naive	57	FALSE	FALSE	FALSE	TRUE	FALSE	TRUE	FALSE	FALSE	FALSE	NA	NA
chr20_5693855_T_TTTTG		chr20:5674501	20	5693855	5	; rs813405; rs809307; rs805762; rs805761	2	; SHLD1 GPCPD1 CHGB TRMT6 MCM8	https://biit.cs.ut.ee/gplink/l/l_tI5BSfSu	CL_0002057_IFNg_24h	monocyte IFNg_24h	2;9	FALSE	TRUE	TRUE	FALSE	FALSE	FALSE	TRUE	FALSE	TRUE	NA	NA
chr20_57460756_C_T	rs7269678	chr20:56035812	20	57460756	2	rs7269678;	1	; CTCFL RBM38 RAE1 PCK1 SPO11	https://biit.cs.ut.ee/gplink/l/IM0ZOJoATA	CL_0002057_LPS_2h	monocyte LPS_2h	8	FALSE	FALSE	FALSE	TRUE	FALSE	FALSE	FALSE	FALSE	TRUE	NA	NA
chr20_9641942_T_C		chr20:9622590	20	9641942	6	; rs2224609; rs6056774; rs6086969; rs6077577; rs747996	1	PAK5; PAK5 LAMP5 PLCB4 ANKEF1 SNAP25	https://biit.cs.ut.ee/gplink/l/npt0qyHaSb	CL_0000625_naive	CD8+ T cell naive	112	FALSE	FALSE	TRUE	FALSE	TRUE	FALSE	FALSE	FALSE	FALSE	NA	NA
chr21_16668006_G_A	rs4435535	chr21:18040325	21	16668006	3	; rs4435535; rs975529	1	; USP25 CXADR BTG3 C21orf91 CHODL	https://biit.cs.ut.ee/gplink/l/wmpVv7t_S0	CL_0002057_LPS_2h	monocyte LPS_2h	16	FALSE	FALSE	FALSE	TRUE	FALSE	FALSE	FALSE	FALSE	TRUE	NA	NA
chr21_16710053_C_CA	rs386394322	chr21:18082372	21	16710053	16	rs2823975; rs8129927; rs2823978; rs56962002; rs797014857; rs150703322; rs765627432; rs9637013; rs28839170; rs28854026; rs11088587; ; rs10718676; rs2823986; rs2823990; rs386394322; rs2823991; rs2823993	1	; CXADR USP25 BTG3 C21orf91 CHODL	https://biit.cs.ut.ee/gplink/l/g0ByF8wCQa	CL_0002057_LPS_2h	monocyte LPS_2h	1	FALSE	FALSE	TRUE	FALSE	FALSE	TRUE	FALSE	FALSE	FALSE	NA	NA
chr21_18390517_G_A	rs750084	chr21:19762834	21	18390517	1	rs750084	1	TMPRSS15; TMPRSS15 CHODL C21orf91 BTG3 CXADR	https://biit.cs.ut.ee/gplink/l/1N3FuWw8Qb	CL_0000236_naive	B cell naive	49	FALSE	FALSE	FALSE	TRUE	FALSE	TRUE	FALSE	FALSE	FALSE	NA	NA
chr21_32468022_A_G	rs543275901	chr21:33840330	21	32468022	1	rs543275901	1	EVA1C; EVA1C URB1 TCP10L CFAP298 MRAP	https://biit.cs.ut.ee/gplink/l/Zh3Kq6NCS6	CL_0000624_naive	CD4+ T cell naive	1	FALSE	FALSE	FALSE	TRUE	FALSE	FALSE	FALSE	FALSE	TRUE	NA	NA
chr22_17636750_C_T	rs9605357	chr22:18119516	22	17636750	57	rs5992076; rs5992768; rs737994; ; rs12160545; rs5992772; rs5992773; rs9604779; rs9605357; rs5992775; rs67786863; rs147374238; rs12166769; rs9605366; rs9604782; rs5992778; rs9618087; rs5992781; rs143728189; rs66927820; rs5992782; rs12170245; rs9604784; rs5992786; rs5992090; rs5992787; rs9604785; rs5992091; rs5992791; rs5992092; rs5992093; rs5992792; rs12160637; rs5992094; rs5992793; rs5992795; rs9…	1	BCL2L13; BCL2L13 ATP6V1E1 SLC25A18 CECR2 BID	https://biit.cs.ut.ee/gplink/l/qzA4hoTVQL	CL_0002057_LPS_2h	monocyte LPS_2h	31	FALSE	FALSE	FALSE	TRUE	FALSE	FALSE	TRUE	FALSE	FALSE	NA	NA
chr22_25537151_T_G	rs186991949	chr22:25933118	22	25537151	1	rs186991949	3	; GRK3 LRP5L MYO18B CRYBB3 KIAA1671	https://biit.cs.ut.ee/gplink/l/N3SsxR1pRX	CL_0000624_naive	CD4+ T cell naive	31;79;49	FALSE	FALSE	TRUE	TRUE	FALSE	FALSE	FALSE	TRUE	FALSE	NA	NA
chr22_25675591_G_A	rs5752196	chr22:26071558	22	25675591	5	rs73166992; ; rs5752196; rs138843143	1	GRK3; GRK3 MYO18B LRP5L CRYBB3 KIAA1671	https://biit.cs.ut.ee/gplink/l/IlRfDwJDT_	CL_0000775_naive	neutrophil naive	25	FALSE	FALSE	TRUE	FALSE	FALSE	FALSE	TRUE	FALSE	FALSE	NA	NA
chr22_39758871_A_T		chr22:40154876	22	39758871	5	; rs12484239	2	ENTHD1; ENTHD1 CACNA1I GRAP2 RPS19BP1 FAM83F	https://biit.cs.ut.ee/gplink/l/f2NlyElvTK	CL_0000236_naive	B cell naive	59;2	FALSE	TRUE	TRUE	FALSE	FALSE	FALSE	FALSE	TRUE	TRUE	NA	NA
chr22_42375511_T_C	rs9607894	chr22:42771517	22	42375511	14	rs1023468; rs4822118; rs5996143; rs5996144; ; rs1011224; rs5996145; rs4422240; rs2269552; rs8142511; rs67414998; rs9607894	1	; NFAM1 TCF20 RRP7A SERHL2 POLDIP3	https://biit.cs.ut.ee/gplink/l/rvPRiBZJRl	CL_0002057_LPS_2h	monocyte LPS_2h	505	FALSE	FALSE	FALSE	TRUE	FALSE	FALSE	TRUE	FALSE	FALSE	NA	NA
chr22_44723779_G_A	rs9306484	chr22:45119659	22	44723779	1	rs9306484	1	PRR5 PRR5-ARHGAP8; PRR5 PRR5-ARHGAP8 PHF21B RTL6 SHISAL1	https://biit.cs.ut.ee/gplink/l/8JFO3STpQB	CL_0000233_naive	platelet naive	1	FALSE	FALSE	FALSE	TRUE	FALSE	FALSE	FALSE	FALSE	TRUE	NA	NA
chr22_48286796_C_G		chr22:48682608	22	48286796	6	rs9615855; rs9615306; rs73169416; ; rs73169417; rs73169418	1	; FAM19A5 TBC1D22A BRD1 CERK ZBED4	https://biit.cs.ut.ee/gplink/l/1EbqZakQTo	CL_0000775_naive	neutrophil naive	12	FALSE	FALSE	TRUE	FALSE	FALSE	FALSE	FALSE	FALSE	TRUE	NA	NA
chr3_10334133_G_A	rs256768	chr3:10375817	3	10334133	2	rs187674; rs256768	1	ATP2B2; ATP2B2 SEC13 GHRL TATDN2 IRAK2	https://biit.cs.ut.ee/gplink/l/9XmS0uOJSI	CL_0002057_LPS_24h	monocyte LPS_24h	6	FALSE	FALSE	FALSE	TRUE	FALSE	FALSE	FALSE	FALSE	TRUE	NA	NA
chr3_105575690_A_G	rs6790496	chr3:105294534	3	105575690	45	rs6790496; rs1157; rs9856106; rs9838585; rs12695120; rs9854039; rs62262973; ; rs72989999; rs9288812; rs10511245; rs10433370; rs10433371; rs10433372; rs10433373; rs62262977; rs62262979; rs147918828; rs9850716; rs62262981; rs62262982; rs140690164; rs74795107; rs62262983; rs72991816; rs72991818; rs75104194; rs62262984; rs62262985; rs62262986; rs62262987; rs78425441; rs76952359; rs148732936; rs755266…	1	ALCAM; ALCAM CBLB CCDC54 BBX CD47	https://biit.cs.ut.ee/gplink/l/i1JVUt0ETa	CL_0002057_naive	monocyte naive	8	FALSE	FALSE	TRUE	FALSE	FALSE	FALSE	FALSE	TRUE	FALSE	NA	NA
chr3_107449355_T_C	rs13314819	chr3:107168202	3	107449355	1	rs13314819	1	; CCDC54 BBX CD47 IFT57 HHLA2	https://biit.cs.ut.ee/gplink/l/xaWmD_trTA	CL_0002057_LPS_24h	monocyte LPS_24h	316	FALSE	FALSE	TRUE	FALSE	TRUE	FALSE	FALSE	FALSE	FALSE	NA	NA
chr3_128430549_C_A	rs4857886	chr3:128149392	3	128430549	1	rs4857886	2	; EEFSEC DNAJB8 GATA2 RPN1 RUVBL1	https://biit.cs.ut.ee/gplink/l/c0Vjnxq2Tn	CL_0000775_naive	neutrophil naive	9;34	FALSE	FALSE	TRUE	TRUE	FALSE	FALSE	FALSE	FALSE	TRUE	NA	NA
chr3_153343091_T_TA	rs78812884; rs397773478	chr3:153060880	3	153343091	2	rs3921588; rs78812884; rs397773478	2	; RAP2B P2RY1 ARHGEF26 MBNL1 DHX36	https://biit.cs.ut.ee/gplink/l/kSywie3fTx	CL_0002057_naive	monocyte naive	4;3	FALSE	TRUE	TRUE	FALSE	TRUE	TRUE	FALSE	FALSE	FALSE	NA	NA
chr3_155314905_CT_C	rs577588923	chr3:155032694	3	155314905	1	rs577588923	1	; PLCH1 MME C3orf33 SLC33A1 GMPS	https://biit.cs.ut.ee/gplink/l/fp_5rFuHQP	CL_0000624_naive	CD4+ T cell naive	4	FALSE	FALSE	FALSE	TRUE	FALSE	TRUE	FALSE	FALSE	FALSE	NA	NA
chr3_158994268_A_G	rs905459	chr3:158712057	3	158994268	36	rs10936164; rs10049111; ; rs958985; rs1354285; rs5853845; rs397875491; rs1503104; rs6793692; rs6441238; rs4440164; rs7612277; rs4680480; rs12497096; rs9878034; rs1827310; rs905459; rs11708727; rs13075466; rs79896700; rs539052261; rs1846897; rs9811068; rs1503103; rs1503102; rs1503105; rs2036486; rs7614679; rs4680482	1	IQCJ; IQCJ MFSD1 RARRES1 GFM1 LXN	https://biit.cs.ut.ee/gplink/l/8gRNj_R4R2	CL_0002057_IFNg_24h	monocyte IFNg_24h	2	FALSE	FALSE	FALSE	TRUE	FALSE	FALSE	FALSE	FALSE	TRUE	NA	NA
chr3_171120469_T_C		chr3:170838258	3	171120469	3	; rs7611574	2	TNIK; TNIK SLC2A2 EIF5A2 RPL22L1 PLD1	https://biit.cs.ut.ee/gplink/l/15diLVWOTg	CL_0000233_naive	platelet naive	44;160	FALSE	FALSE	TRUE	FALSE	FALSE	FALSE	TRUE	FALSE	TRUE	NA	NA
chr3_192835271_G_A	rs13063622	chr3:192553060	3	192835271	14	rs138178708; rs34628136; rs541683734; ; rs60038466; rs71314472; rs71314473; rs7614503; rs67428773; rs397771088; rs13091375; rs13063622; rs34931225; rs35084850	2	; FGF12 HRASLS ATP13A5 ATP13A4 OPA1	https://biit.cs.ut.ee/gplink/l/Ku5JIkoSRS	CL_0002057_IFNg_24h	monocyte IFNg_24h	77;16	FALSE	TRUE	TRUE	FALSE	FALSE	FALSE	TRUE	TRUE	FALSE	NA	NA
chr3_29833800_C_A		chr3:29875291	3	29833800	25	rs62237103; rs2888165; rs2371829; rs4626052; rs4680849; rs397875184; ; rs35831867; rs4680853; rs4680731; rs4680854; rs7648919; rs4533605; rs9859877; rs10510629; rs4408838; rs397773289; rs7645947; rs13084217	1	RBMS3; RBMS3 TGFBR2 GADL1 ZCWPW2 AZI2	https://biit.cs.ut.ee/gplink/l/IZKSAoOQRi	CL_0000233_naive	platelet naive	1	FALSE	FALSE	FALSE	TRUE	TRUE	FALSE	FALSE	FALSE	FALSE	NA	NA
chr3_38216688_T_C		chr3:38258179	3	38216688	4	; rs156261	1	OXSR1; OXSR1 SLC22A13 SLC22A14 MYD88 ACAA1	https://biit.cs.ut.ee/gplink/l/-2ZxjpYJQj	CL_0002057_LPS_2h	monocyte LPS_2h	4	FALSE	FALSE	FALSE	TRUE	FALSE	FALSE	FALSE	FALSE	TRUE	NA	NA
chr3_44465065_TA_T	rs527871451; rs34412481	chr3:44506557	3	44465065	1	rs527871451; rs34412481	2	ZNF445; ZNF445 ZNF852 TCAIM ZKSCAN7 ZNF660	https://biit.cs.ut.ee/gplink/l/WNioKKrLRI	CL_0002057_LPS_2h	monocyte LPS_2h	26;8	FALSE	FALSE	TRUE	FALSE	FALSE	FALSE	FALSE	TRUE	FALSE	NA	NA
chr3_54661736_A_G	rs646929	chr3:54695763	3	54661736	4	rs578032; rs838022; rs646929; rs667671	2	CACNA2D3; LRTM1 CACNA2D3 SELENOK ACTR8 IL17RB	https://biit.cs.ut.ee/gplink/l/VmFjGKfST7	CL_0000625_naive	CD8+ T cell naive	175;214	FALSE	FALSE	TRUE	TRUE	TRUE	FALSE	FALSE	FALSE	FALSE	NA	NA
chr3_56815721_T_C	rs1354034	chr3:56849749	3	56815721	16	rs6445826; rs1354034; rs1344142; ; rs13062635; rs13085861; rs13086448; rs13074522; rs9843226; rs9861033; rs7652638; rs11925835; rs55709294; rs13063588; rs6800743; rs11130549	3	ARHGEF3; ARHGEF3 FAM208A CCDC66 SPATA12 IL17RD	https://biit.cs.ut.ee/gplink/l/CY6ZukXhSq	CL_0000233_naive	platelet naive	56;167;4	FALSE	FALSE	TRUE	TRUE	TRUE	TRUE	FALSE	FALSE	TRUE	27863252-GCST004599-EFO_0004584; 27863252-GCST004603-EFO_0004309; 27863252-GCST004607-EFO_0007985; 27863252-GCST004611-EFO_0007986; 27863252-GCST004612-EFO_0007986; 27863252-GCST004619-EFO_0007986; 27863252-GCST004622-EFO_0007986; 27863252-GCST004627-EFO_0004587; 27863252-GCST004632-EFO_0007993; 27863252-GCST004633-EFO_0007990; PLT	Mean platelet volume;Platelet count;Plateletcrit;High light scatter reticulocyte count;High light scatter reticulocyte percentage of red cells;Reticulocyte fraction of red cells;Reticulocyte count;Lymphocyte counts;Lymphocyte percentage of white cells;Neutrophil percentage of white cells;NA
chr3_56897113_C_T	rs4681930	chr3:56931141	3	56897113	16	; rs4681920; rs201397280; rs397794218; rs78584019; rs76999456; rs80283987; rs76951516; rs77588230; rs11323819; rs80110863; rs4681930; rs57457989; rs75959875	1	ARHGEF3; SPATA12 ARHGEF3 IL17RD FAM208A CCDC66	https://biit.cs.ut.ee/gplink/l/LhFulWEoSi	CL_0000775_naive	neutrophil naive	59	FALSE	FALSE	TRUE	FALSE	TRUE	FALSE	FALSE	FALSE	FALSE	NA	NA
chr3_57319743_A_AT		chr3:57353771	3	57319743	55	; rs9835658; rs9816323; rs950266; rs6775523; rs6801961; rs6802245; rs4681973; rs11426838; rs397793131; rs1589655; rs397743208; rs9862408; rs10575147; rs368340851; rs7620538; rs7642234; rs1523109; rs10582984; rs55993517; rs13067860; rs9835121; rs9790203; rs9790116; rs12491533; rs7613758; rs13080525; rs7638879; rs7638957; rs10433623; rs13062727; rs71088058; rs201672646; rs397989744; rs35518265; rs3…	1	DNAH12; DNAH12 ASB14 APPL1 HESX1 IL17RD	https://biit.cs.ut.ee/gplink/l/WM20GBGeQZ	CL_0002057_naive	monocyte naive	10	FALSE	FALSE	TRUE	FALSE	FALSE	TRUE	FALSE	FALSE	FALSE	NA	NA
chr3_60142694_CT_C	rs202047116	chr3:60128422	3	60142694	14	rs111979421; rs202047116; ; rs77556274; rs398071832; rs17062353; rs7642242; rs7630823; rs10510830; rs62240251; rs62240252; rs12638226; rs113955130; rs113790281; rs141139702	1	FHIT; FHIT C3orf67 PTPRG FAM3D FAM107A	https://biit.cs.ut.ee/gplink/l/4T0qhuKASj	CL_0002057_LPS_2h	monocyte LPS_2h	6	FALSE	FALSE	FALSE	TRUE	FALSE	FALSE	FALSE	FALSE	TRUE	NA	NA
chr3_63816769_C_CT		chr3:63802445	3	63816769	1		1	; C3orf49 ATXN7 SNTN PSMD6 SYNPR	https://biit.cs.ut.ee/gplink/l/tWaKaIdZR7	CL_0002057_LPS_24h	monocyte LPS_24h	16	FALSE	TRUE	TRUE	FALSE	FALSE	FALSE	FALSE	FALSE	TRUE	NA	NA
chr4_10135501_C_G		chr4:10137125	4	10135501	113	rs4358401; ; rs4235357; rs77243243; rs11732828; rs10939722; rs35923340; rs572182266; rs6850516; rs10020804; rs10012288; rs10025550; rs35048105; rs10805355; rs10805356; rs10939728; rs10028421; rs10028503; rs10015872; rs10034208; rs78660728; rs398092158; rs74843379; rs4697928; rs4697929; rs5856039; rs796868855; rs4574408; rs4484300; rs5856040; rs398063267; rs34128257; rs4697932; rs141992701; rs4697…	6	; WDR1 SLC2A9 ZNF518B CLNK DRD5	https://biit.cs.ut.ee/gplink/l/YgBIW6A_Tn	CL_0002057_naive	monocyte naive	157;154;114;119;57;88	FALSE	TRUE	TRUE	TRUE	TRUE	TRUE	TRUE	TRUE	FALSE	NA	NA
chr4_102325419_ACACT_A	rs145021182; rs75562818	chr4:103246576	4	102325419	10	rs145021182; rs75562818; rs7692921; rs6850893; rs7664683; rs147218183; rs62329460; ; rs62329462; rs4146610; rs2054394	1	SLC39A8; SLC39A8 NFKB1 BANK1 MANBA UBE2D3	https://biit.cs.ut.ee/gplink/l/aohV4uKeT1	CL_0002057_LPS_24h	monocyte LPS_24h	5	FALSE	FALSE	FALSE	TRUE	FALSE	FALSE	FALSE	FALSE	TRUE	NA	NA
chr4_130320342_T_C	rs7662170	chr4:131241497	4	130320342	18	; rs1027884; rs7661167; rs7662170; rs2175124; rs2310949; rs10032131; rs6838581; rs6838433; rs6838871; rs6534780; rs10671609; rs10650637; rs6534781; rs6822444; rs1567372	1	; C4orf33 SCLT1 JADE1 PGRMC2 LARP1B	https://biit.cs.ut.ee/gplink/l/uhNBkbwcTt	CL_0000233_naive	platelet naive	2	FALSE	FALSE	TRUE	FALSE	FALSE	FALSE	FALSE	FALSE	TRUE	NA	NA
chr4_148925397_GA_G	rs67094018	chr4:149846549	4	148925397	9	rs17623254; rs113337751; rs56210215; rs58528421; rs72719803; rs67094018; rs56159747; rs2358676; rs4407483	1	; IQCM NR3C2 ARHGAP10 DCLK2 PRMT9	https://biit.cs.ut.ee/gplink/l/qBP5q39ETq	CL_0002057_LPS_2h	monocyte LPS_2h	2	FALSE	TRUE	FALSE	TRUE	FALSE	FALSE	FALSE	FALSE	TRUE	NA	NA
chr4_175211193_G_GACACA		chr4:176132344	4	175211193	1		1	; ADAM29 GLRA3 GPM6A HPGD WDR17	https://biit.cs.ut.ee/gplink/l/7PQmck2UTj	CL_0000624_naive	CD4+ T cell naive	137	FALSE	FALSE	TRUE	FALSE	TRUE	FALSE	FALSE	FALSE	FALSE	NA	NA
chr4_189096487_G_C		chr4:190017641	4	189096487	1		1	; FRG1 FRG2 TRIML1 TRIML2 DUX4	https://biit.cs.ut.ee/gplink/l/v3zhvMEiQf	CL_0000625_naive	CD8+ T cell naive	5	FALSE	FALSE	FALSE	TRUE	FALSE	FALSE	FALSE	FALSE	TRUE	NA	NA
chr4_38413905_TA_T	rs34606784; rs397993003	chr4:38415526	4	38413905	18	; rs9999854; rs34850548; rs777498010; rs901703; rs540638519; rs546546307; rs34606784; rs397993003; rs1487621; rs6858394; rs12508873; rs10012289; rs10025845	1	; KLF3 TBC1D1 TLR10 TLR1 TLR6	https://biit.cs.ut.ee/gplink/l/qUp8z-owR2	CL_0002057_IFNg_24h	monocyte IFNg_24h	23	FALSE	TRUE	TRUE	FALSE	FALSE	FALSE	FALSE	TRUE	FALSE	NA	NA
chr4_47001543_G_A	rs4695185	chr4:47003560	4	47001543	2	rs3792210; rs4695185	4	GABRB1; GABRA4 GABRB1 COX7B2 COMMD8 ATP10D	https://biit.cs.ut.ee/gplink/l/E4sFiE2xTM	CL_0000625_naive	CD8+ T cell naive	245;299;40;386	FALSE	FALSE	TRUE	TRUE	TRUE	TRUE	FALSE	TRUE	FALSE	NA	NA
chr4_4813315_C_CA	rs35229819	chr4:4815042	4	4813315	6	rs10937893; rs35229819; rs1907989; rs2172443; rs2220746; rs28378669	1	; MSX1 CYTL1 STK32B STX18 NSG1	https://biit.cs.ut.ee/gplink/l/cpd8z2pGTt	CL_0000236_naive	B cell naive	2	FALSE	TRUE	FALSE	TRUE	FALSE	FALSE	FALSE	FALSE	TRUE	NA	NA
chr4_59610238_G_A	rs72612793	chr4:60475956	4	59610238	1	rs72612793	1	; ADGRL3 IGFBP7 POLR2B NOA1 REST	https://biit.cs.ut.ee/gplink/l/0mITnzT0QG	CL_0000625_naive	CD8+ T cell naive	5	FALSE	FALSE	FALSE	TRUE	FALSE	FALSE	FALSE	FALSE	TRUE	NA	NA
chr4_7359313_C_CA		chr4:7361040	4	7359313	3		1	SORCS2; PSAPL1 SORCS2 GRPEL1 TADA2B CCDC96	https://biit.cs.ut.ee/gplink/l/gBprZj67Qz	CL_0002057_naive	monocyte naive	81	FALSE	FALSE	TRUE	FALSE	TRUE	FALSE	FALSE	FALSE	FALSE	NA	NA
chr4_74865211_TG_T	rs78049499	chr4:75790421	4	74865211	1	rs78049499	1	; PARM1 BTC AREG EREG EPGN	https://biit.cs.ut.ee/gplink/l/iwxxn5YFQa	CL_0000625_naive	CD8+ T cell naive	2	FALSE	FALSE	FALSE	TRUE	FALSE	FALSE	FALSE	FALSE	TRUE	NA	NA
chr5_103601008_C_T	rs72782560	chr5:102936709	5	103601008	1	rs72782560	1	; NUDT12 C5orf30 PPIP5K2 GIN1 PAM	https://biit.cs.ut.ee/gplink/l/pUSsGv9VRT	CL_0000233_naive	platelet naive	17	FALSE	FALSE	TRUE	FALSE	FALSE	TRUE	FALSE	FALSE	FALSE	NA	NA
chr5_116539567_C_T	rs254221	chr5:115875263	5	116539567	2	rs254221; rs254222	1	SEMA6A; SEMA6A COMMD10 ARL14EPL LVRN AP3S1	https://biit.cs.ut.ee/gplink/l/UMkjKAWPQe	CL_0002057_IFNg_24h	monocyte IFNg_24h	9	FALSE	FALSE	TRUE	FALSE	FALSE	FALSE	FALSE	TRUE	FALSE	NA	NA
chr5_151750509_C_CA	rs397999583	chr5:151130070	5	151750509	1	rs397999583	1	ATOX1; ATOX1 G3BP1 SPARC GLRA1 FAT2	https://biit.cs.ut.ee/gplink/l/FMChWxU0Sr	CL_0000624_naive	CD4+ T cell naive	2	FALSE	FALSE	TRUE	FALSE	TRUE	FALSE	FALSE	FALSE	FALSE	NA	NA
chr5_166434137_G_A	rs4868985	chr5:165861142	5	166434137	11	rs751820; rs751821; rs4868985; rs72821469; rs35061808; rs572169553; rs869096631; rs397793333; rs2597670; ; rs2597669; rs1668198; rs10069064	1	; TENM2 WWC1 RARS FBLL1 PANK3	https://biit.cs.ut.ee/gplink/l/BO5p1Om7SQ	CL_0002057_LPS_24h	monocyte LPS_24h	21	FALSE	FALSE	TRUE	FALSE	FALSE	TRUE	FALSE	FALSE	FALSE	NA	NA
chr5_172450134_T_C	rs13175268	chr5:171877138	5	172450134	3	rs34151922; rs13175268;	1	SH3PXD2B; SH3PXD2B UBTD2 NEURL1B STK10 DUSP1	https://biit.cs.ut.ee/gplink/l/9Oppm_6mSz	CL_0002057_LPS_24h	monocyte LPS_24h	46	FALSE	FALSE	TRUE	FALSE	FALSE	FALSE	FALSE	TRUE	FALSE	NA	NA
chr5_18945545_G_A	rs10056217	chr5:18945654	5	18945545	4	; rs6888399; rs10056217	1	; CDH18	https://biit.cs.ut.ee/gplink/l/rFZqYPxlQ1	CL_0002057_LPS_2h	monocyte LPS_2h	22	FALSE	FALSE	TRUE	FALSE	FALSE	TRUE	FALSE	FALSE	FALSE	NA	NA
chr5_22808762_GT_G	rs561184486; rs70959757	chr5:22808871	5	22808762	1	rs561184486; rs70959757	1	CDH12; CDH12 PRDM9 CDH10 CDH18 CDH9	https://biit.cs.ut.ee/gplink/l/DxzuF9nDRK	CL_0002057_LPS_2h	monocyte LPS_2h	379	FALSE	FALSE	FALSE	TRUE	FALSE	FALSE	TRUE	FALSE	FALSE	NA	NA
chr5_2754675_A_G	rs4866489	chr5:2754789	5	2754675	4	rs112775132; rs72044920; rs376608796; rs4866489;	2	C5orf38; C5orf38 IRX2 IRX1 MRPL36 LPCAT1	https://biit.cs.ut.ee/gplink/l/axkiJrbmRZ	CL_0000624_naive	CD4+ T cell naive	14;37	FALSE	TRUE	TRUE	TRUE	FALSE	FALSE	FALSE	FALSE	TRUE	NA	NA
chr5_29539468_A_G	rs614969	chr5:29539575	5	29539468	16	rs588359; rs654319; rs588401; rs812567; rs694626; ; rs673164; rs2330085; rs631324; rs584553; rs614969; rs687686; rs597314; rs179315	1	; CDH6 DROSHA PDZD2 CDH9 GOLPH3	https://biit.cs.ut.ee/gplink/l/_MgOhFapRe	CL_0000624_naive	CD4+ T cell naive	7	FALSE	FALSE	TRUE	FALSE	FALSE	TRUE	FALSE	FALSE	FALSE	NA	NA
chr5_3219858_T_C		chr5:3219972	5	3219858	4	; rs2453372	1	; IRX1 C5orf38 IRX2 MRPL36 LPCAT1	https://biit.cs.ut.ee/gplink/l/SOrcp8p7TA	CL_0000236_naive	B cell naive	2	FALSE	FALSE	FALSE	TRUE	FALSE	FALSE	TRUE	FALSE	FALSE	NA	NA
chr5_3658163_G_GT	rs11458379	chr5:3658277	5	3658163	1	rs11458379	1	; IRX1 C5orf38 IRX2 ADAMTS16 ICE1	https://biit.cs.ut.ee/gplink/l/EtqUbDuNTr	CL_0000624_naive	CD4+ T cell naive	4	FALSE	FALSE	TRUE	FALSE	FALSE	FALSE	TRUE	FALSE	FALSE	NA	NA
chr5_57611819_AT_A	rs369146271	chr5:56907646	5	57611819	6	rs369146271; ; rs573000342; rs540516573; rs528838541	1	; ACTBL2 GPBP1 MIER3 SETD9 MAP3K1	https://biit.cs.ut.ee/gplink/l/cg5340pcQr	CL_0000625_naive	CD8+ T cell naive	273	FALSE	FALSE	TRUE	FALSE	FALSE	FALSE	TRUE	FALSE	FALSE	NA	NA
chr5_74445845_AG_A	rs35754954; rs796686709	chr5:73741670	5	74445845	9	rs172438; rs294986; rs583195; rs190904; rs372317; rs381851; ; rs417421; rs35754954; rs796686709	1	; HEXB GFM2 NSA2 FAM169A ARHGEF28	https://biit.cs.ut.ee/gplink/l/YTi7Nk7hSO	CL_0000233_naive	platelet naive	285	FALSE	FALSE	FALSE	TRUE	FALSE	TRUE	FALSE	FALSE	FALSE	NA	NA
chr5_77996890_T_C	rs6887042	chr5:77292714	5	77996890	3	rs6887042; rs56061875;	1	; AP3B1 TBCA OTP SCAMP1 WDR41	https://biit.cs.ut.ee/gplink/l/wjC4EaF8Qp	CL_0000625_naive	CD8+ T cell naive	28	FALSE	FALSE	TRUE	FALSE	FALSE	FALSE	FALSE	TRUE	FALSE	NA	NA
chr6_116232159_C_CTG	rs10630212	chr6:116553322	6	116232159	43	rs11318643; rs397887014; ; rs1204810; rs10630212; rs150258697; rs540204264; rs60150533; rs1204819; rs1204822; rs1204823; rs1204824; rs1204833; rs910391; rs1204853; rs1204854; rs397735194; rs957529; rs2982842; rs12212556; rs12212609; rs10456907; rs12210044; rs12213442; rs13214667; rs12203516; rs529893975; rs66863151; rs71012332; rs773989764; rs12214879; rs138007475; rs67772729; rs12214926; rs25010…	1	NT5DC1; NT5DC1 TSPYL4 DSE TSPYL1 COL10A1	https://biit.cs.ut.ee/gplink/l/cwedaOikTG	CL_0002057_IFNg_24h	monocyte IFNg_24h	26	FALSE	FALSE	TRUE	FALSE	FALSE	TRUE	FALSE	FALSE	FALSE	NA	NA
chr6_12155416_C_T	rs2157494	chr6:12155649	6	12155416	13	rs9369102; rs575264090; rs143910763; rs219940; rs219945; ; rs34222460; rs796941662; rs220022; rs220025; rs2157494; rs9394589; rs373542843	1	HIVEP1; HIVEP1 EDN1 ADTRP PHACTR1 TMEM170B	https://biit.cs.ut.ee/gplink/l/64gan4xMTB	CL_0002057_LPS_24h	monocyte LPS_24h	88	FALSE	FALSE	TRUE	FALSE	TRUE	FALSE	FALSE	FALSE	FALSE	NA	NA
chr6_137427712_A_G	rs6929588	chr6:137748849	6	137427712	14	; rs6929588; rs6936167; rs6936021; rs6570157; rs6916099; rs1022500; rs68145514; rs150331033; rs1022398; rs7776433; rs1333622; rs1333621	1	; OLIG3 IL22RA2 IL20RA TNFAIP3 SLC35D3	https://biit.cs.ut.ee/gplink/l/Mc2QEkrdS-	CL_0002057_IFNg_24h	monocyte IFNg_24h	1	FALSE	FALSE	FALSE	TRUE	FALSE	FALSE	FALSE	FALSE	TRUE	NA	NA
chr6_138629388_TC_T	rs67914145	chr6:138950525	6	138629388	1	rs67914145	2	; CCDC28A ECT2L HEBP2 REPS1 ARFGEF3	https://biit.cs.ut.ee/gplink/l/Cm_uPJ4QR1	CL_0000625_naive, CL_0000624_naive	CD8+ T cell naive, CD4+ T cell naive	30;4	FALSE	FALSE	TRUE	FALSE	FALSE	FALSE	TRUE	FALSE	FALSE	NA	NA
chr6_148287702_T_G		chr6:148608838	6	148287702	25	rs78578967; rs75903082; rs77022743; ; rs117187653; rs17078219; rs79395203; rs78625288; rs17078231; rs146468126; rs79522627; rs76444866; rs76751384; rs17078240; rs61050012; rs17705849; rs117825979; rs115854904; rs74301759; rs74301760; rs77016716; rs75193141; rs61667542	1	SASH1; SASH1 UST SAMD5 STXBP5 TAB2	https://biit.cs.ut.ee/gplink/l/2Vt9faNbRv	CL_0002057_naive	monocyte naive	7	FALSE	FALSE	FALSE	TRUE	FALSE	FALSE	FALSE	FALSE	TRUE	NA	NA
chr6_158442798_C_T	rs705960	chr6:158863830	6	158442798	2	rs2779089; rs705960	2	TULP4; TULP4 TMEM181 DYNLT1 SYTL3 GTF2H5	https://biit.cs.ut.ee/gplink/l/7oUE_cO0QO	CL_0000624_naive	CD4+ T cell naive	389;8	FALSE	FALSE	FALSE	TRUE	FALSE	FALSE	TRUE	FALSE	TRUE	NA	NA
chr6_165203893_G_A	rs71569497	chr6:165617382	6	165203893	9	rs78998928; rs34114625; rs13207633; ; rs34965310; rs71026678; rs11759073; rs71569497	1	; C6orf118 PDE10A TBXT PRR18 SFT2D1	https://biit.cs.ut.ee/gplink/l/7Ja7phyERT	CL_0000625_naive	CD8+ T cell naive	14	FALSE	FALSE	TRUE	FALSE	FALSE	FALSE	FALSE	FALSE	TRUE	NA	NA
chr6_165411052_C_A		chr6:165824541	6	165411052	26	rs220796; ; rs220794; rs149697167; rs220792; rs220787; rs220786; rs220783; rs220782; rs220779; rs220773; rs220771; rs1759948; rs220760; rs220758; rs220754; rs220753; rs220751; rs220748; rs220743; rs220741	1	PDE10A; PDE10A C6orf118 TBXT PRR18 SFT2D1	https://biit.cs.ut.ee/gplink/l/Cm_XQTGMRH	CL_0000775_naive	neutrophil naive	3	FALSE	TRUE	FALSE	TRUE	FALSE	FALSE	FALSE	FALSE	TRUE	NA	NA
chr6_16566670_T_G		chr6:16566901	6	16566670	1		1	ATXN1; ATXN1 GMPR MYLIP STMND1 RBM24	https://biit.cs.ut.ee/gplink/l/R7mRkfJARP	CL_0002057_IFNg_24h	monocyte IFNg_24h	1	FALSE	FALSE	TRUE	FALSE	FALSE	FALSE	FALSE	FALSE	TRUE	NA	NA
chr6_20640874_G_A	rs35889049	chr6:20641105	6	20640874	23	rs13220465; rs13190734; rs13194407; rs35889049; rs71535526; rs7745175; rs9969037; rs7749464; rs16884072; ; rs16884074; rs61613763; rs13190727; rs35260725; rs7749083; rs13203361; rs736425; rs371534184; rs5874781; rs11970425	1	CDKAL1; CDKAL1 E2F3 MBOAT1 ID4 SOX4	https://biit.cs.ut.ee/gplink/l/o9mGtkpMQG	CL_0000775_naive	neutrophil naive	24	FALSE	FALSE	FALSE	TRUE	FALSE	FALSE	FALSE	TRUE	FALSE	NA	NA
chr6_32543752_G_A		chr6:32511529	6	32543752	492	; rs72853984; rs73728000; rs34523106; rs34673795; rs115729463; rs62405632; rs79138148; rs111739306; rs115707905; rs77498463; rs62405645; rs77993032; rs112532723; rs72844134; rs111485252; rs68109409; rs72844151; rs72492326; rs72844167; rs73397417; rs35882239; rs34041546; rs35767951; rs72844197; rs75999763; rs34720636; rs9270206; rs9270607; rs9270608; rs9270610; rs9270615; rs9270619; rs9270624; rs9…	1	; HLA-DRB5 HLA-DRB1 HLA-DRA HLA-DQB1 BTNL2	https://biit.cs.ut.ee/gplink/l/Vo-rWg36Qs	CL_0002057_IFNg_24h	monocyte IFNg_24h	9	FALSE	FALSE	FALSE	TRUE	FALSE	FALSE	TRUE	FALSE	FALSE	NA	NA
chr6_32589544_C_T		chr6:32557321	6	32589544	428	rs9268846; rs9268849; rs9268853; rs9268858; ; rs9268864; rs7747529; rs9268884; rs9268889; rs9268905; rs9268906; rs9268923; rs34335527; rs33936419; rs2395185; rs2395186; rs9268947; rs9268954; rs9268960; rs9268961; rs9268963; rs9268965; rs9268969; rs9268970; rs28654725; rs373214970; rs28895224; rs28895225; rs9391782; rs9405036; rs9391874; rs9391785; rs28789995; rs28895234; rs28895236; rs9405038; rs…	1	HLA-DRB1; HLA-DRB1 HLA-DRB5 HLA-DQB1 HLA-DRA BTNL2	https://biit.cs.ut.ee/gplink/l/XxdnONkYQl	CL_0002057_IFNg_24h	monocyte IFNg_24h	16	FALSE	FALSE	FALSE	TRUE	FALSE	FALSE	TRUE	FALSE	FALSE	NA	NA
chr6_39302702_A_C		chr6:39270478	6	39302702	9	rs34625110; rs72855524; rs34102522; ; rs9471058; rs1078911; rs10807205; rs9394583	1	KCNK17; KCNK17 KCNK16 KIF6 KCNK5 SAYSD1	https://biit.cs.ut.ee/gplink/l/D8NgPjhQSV	CL_0000625_naive	CD8+ T cell naive	537	FALSE	FALSE	FALSE	TRUE	FALSE	FALSE	FALSE	FALSE	TRUE	NA	NA
chr6_44900099_C_T	rs3957282	chr6:44867836	6	44900099	91	rs113429567; rs489448; ; rs2817118; rs6911254; rs56078331; rs546936; rs1680902; rs35111847; rs1283926; rs1283925; rs1283924; rs1298942; rs1283922; rs1296351; rs1283921; rs545441; rs67871559; rs761133030; rs78121766; rs631320; rs558762897; rs767453907; rs70993468; rs17335164; rs11372998; rs552972; rs227804; rs227805; rs112748697; rs227807; rs227809; rs227810; rs201303659; rs190137; rs227811; rs227…	23	SUPT3H; SUPT3H RUNX2 CDC5L SPATS1 AARS2	https://biit.cs.ut.ee/gplink/l/8hqwRp_ySs	CL_0000624_naive, CL_0000625_naive	CD8+ T cell naive, CD4+ T cell naive	20;19;24;318;28;73;431;153;70;8;163;175;165;222;13	FALSE	TRUE	TRUE	TRUE	TRUE	TRUE	TRUE	TRUE	TRUE	NA	NA
chr6_65318497_T_C	rs9354223	chr6:66028390	6	65318497	22	rs9342464; rs9345601; rs9342465; rs1466909; rs11306770; rs9345602; rs9363343; rs11969480; rs28557239; rs6937429; rs9354222; rs9345603; rs9354223; rs9345605; ; rs6455036; rs17412215; rs2017746; rs9354228; rs4710517	1	EYS; EYS PHF3 PTP4A1 LGSN FKBP1C	https://biit.cs.ut.ee/gplink/l/H-O5IOr5RX	CL_0000236_naive	B cell naive	2	FALSE	TRUE	FALSE	TRUE	FALSE	FALSE	FALSE	FALSE	TRUE	NA	NA
chr6_76618975_A_G	rs2446103	chr6:77328692	6	76618975	10	rs4708276; rs34119634; rs397795098; ; rs71309321; rs5877500; rs4128345; rs7748294; rs3002657; rs2446103	1	; IMPG1 MYO6 HTR1B SENP6 FILIP1	https://biit.cs.ut.ee/gplink/l/ihg1p4vSQ_	CL_0000775_naive	neutrophil naive	10	FALSE	FALSE	TRUE	FALSE	FALSE	FALSE	TRUE	FALSE	FALSE	NA	NA
chr6_94283151_T_C		chr6:94992869	6	94283151	22	; rs220976; rs452854; rs446092; rs380842; rs436889; rs398110432; rs402892; rs371345; rs524391; rs869144605; rs417343; rs476421; rs409327; rs71542064; rs547737589	1	; EPHA7 MANEA FUT9 UFL1 FHL5	https://biit.cs.ut.ee/gplink/l/ES1KalejSG	CL_0002057_naive	monocyte naive	12	FALSE	FALSE	TRUE	FALSE	TRUE	FALSE	FALSE	FALSE	FALSE	NA	NA
chr7_100876212_C_T	rs7794216	chr7:100473833	7	100876212	16	; rs7384255; rs6955197; rs7782299; rs7784933; rs7800241; rs7794216; rs3808355; rs72449099; rs398067118; rs56134000; rs74818172	1	SRRT; SRRT TRIP6 SLC12A9 UFSP1 ACHE	https://biit.cs.ut.ee/gplink/l/v5IevI1rR8	CL_0002057_LPS_2h	monocyte LPS_2h	7	FALSE	FALSE	FALSE	TRUE	FALSE	FALSE	FALSE	FALSE	TRUE	NA	NA
chr7_129150955_A_G	rs12668381	chr7:128790796	7	129150955	23	rs12668381; rs12666384; rs12673144; rs12673188; rs13239893; rs2566890; rs58496468; rs35423524; rs35952546; rs2701317; rs2566891; ; rs28783746; rs13235509; rs6949483; rs2566892; rs74993349; rs6976529; rs3173902; rs2293426	1	TSPAN33; TSPAN33 SMO AHCYL2 TNPO3	https://biit.cs.ut.ee/gplink/l/ht3gYb0URM	CL_0000775_naive	neutrophil naive	118	FALSE	FALSE	TRUE	FALSE	FALSE	FALSE	TRUE	FALSE	FALSE	NA	NA
chr7_134453628_C_A	rs1790998	chr7:134138380	7	134453628	94	rs1790998; rs1424426; rs5887682; rs397795357; rs397763327; rs1732043; ; rs59743852; rs796345021; rs810649; rs782527; rs1732032; rs782525; rs12386571; rs60920667; rs397701584; rs6947015; rs782518; rs782516; rs12668321; rs782513; rs1524978; rs6953021; rs6953277; rs782512; rs6964009; rs782511; rs1404553; rs12667578; rs1852054; rs10247315; rs7789833; rs7809138; rs782505; rs10225802; rs34480261; rs603…	1	AKR1B1; AKR1B1 AKR1B10 AKR1B15 SLC35B4 LRGUK	https://biit.cs.ut.ee/gplink/l/BuuWZebVR5	CL_0002057_LPS_2h	monocyte LPS_2h	2	FALSE	TRUE	FALSE	TRUE	FALSE	FALSE	FALSE	FALSE	TRUE	NA	NA
chr7_136803947_CA_C	rs34637878; rs750687534	chr7:136488694	7	136803947	125	rs10585339; rs6467684; rs6969678; ; rs11981487; rs569737322; rs778793090; rs6977293; rs2081330; rs2098789; rs2098790; rs10954545; rs12707331; rs4732232; rs7809426; rs4732233; rs397769822; rs397694936; rs36198756; rs36199474; rs36200533; rs143208639; rs75713201; rs56244951; rs10954546; rs1593217; rs11979564; rs6467686; rs6943818; rs4732234; rs71176334; rs541161380; rs2081332; rs62485187; rs2005127…	1	; CHRM2 PTN DGKI MTPN FAM180A	https://biit.cs.ut.ee/gplink/l/1mGE0qeYTH	CL_0000624_naive	CD4+ T cell naive	38	FALSE	FALSE	TRUE	FALSE	FALSE	FALSE	FALSE	FALSE	TRUE	NA	NA
chr7_142971391_T_A	rs185894911	chr7:142668475	7	142971391	1	rs185894911	1	; KEL LLCFC1 TRPV5 OR9A2 TRPV6	https://biit.cs.ut.ee/gplink/l/u4MCy7PqQC	CL_0000233_naive	platelet naive	3	FALSE	FALSE	FALSE	TRUE	FALSE	FALSE	FALSE	FALSE	TRUE	NA	NA
chr7_150783182_C_CA		chr7:150480270	7	150783182	16	; rs35688368; rs746538547; rs4725361; rs4725938; rs6464098; rs6464099; rs6464100; rs10696167; rs6464101; rs6464102; rs6464104; rs1985881	1	; TMEM176B TMEM176A GIMAP5 AOC1 GIMAP1	https://biit.cs.ut.ee/gplink/l/DCTakJgXSh	CL_0002057_IFNg_24h	monocyte IFNg_24h	4	FALSE	FALSE	FALSE	TRUE	FALSE	TRUE	FALSE	FALSE	FALSE	NA	NA
chr7_151407734_A_G		chr7:151104820	7	151407734	16	; rs35791656; rs12533730; rs917613; rs6966840; rs10717500; rs397890490; rs9655606; rs397764856; rs397805451; rs7781279; rs28665356; rs7806340	1	WDR86; WDR86 CRYGN NUB1 RHEB SMARCD3	https://biit.cs.ut.ee/gplink/l/9gEQYFsxQk	CL_0000233_naive	platelet naive	21	FALSE	FALSE	TRUE	FALSE	FALSE	FALSE	TRUE	FALSE	FALSE	NA	NA
chr7_153860444_T_G	rs73163412	chr7:153557529	7	153860444	2	rs73163412; rs150643489	2	; DPP6 ACTR3B PAXIP1 XRCC2 HTR5A	https://biit.cs.ut.ee/gplink/l/0oTMBraHR2	CL_0002057_LPS_24h	monocyte LPS_24h	980;163	FALSE	FALSE	FALSE	TRUE	FALSE	FALSE	TRUE	TRUE	FALSE	NA	NA
chr7_16464652_TTC_T	rs72323066	chr7:16504277	7	16464652	9	rs10499468; rs73072899; rs7798756; rs17619769; ; rs67149353; rs72323066; rs4719467; rs6964370	2	SOSTDC1; SOSTDC1 ISPD LRRC72 ANKMY2 BZW2	https://biit.cs.ut.ee/gplink/l/P_ODRHU0RK	CL_0000625_naive	CD8+ T cell naive	31;380	FALSE	FALSE	FALSE	TRUE	FALSE	TRUE	FALSE	FALSE	TRUE	NA	NA
chr7_33542478_C_T		chr7:33582090	7	33542478	27	rs9639677; rs397827562; rs991186; rs991185; rs1376354; ; rs10223899; rs10267428; rs59715098; rs397755041; rs28416527; rs28869282; rs66929573; rs4720123; rs4720124; rs4720125; rs4720126; rs61059309; rs7799007; rs7798741; rs1882039; rs67866443; rs7779722	1	BBS9; BBS9 BMPER RP9 NT5C3A FKBP9	https://biit.cs.ut.ee/gplink/l/HaPcKWFSQn	CL_0002057_LPS_2h	monocyte LPS_2h	150	FALSE	FALSE	TRUE	FALSE	TRUE	FALSE	FALSE	FALSE	FALSE	NA	NA
chr7_51277573_C_T	rs11761297	chr7:51345270	7	51277573	1	rs11761297	1	COBL; COBL GRB10 DDC FIGNL1 IKZF1	https://biit.cs.ut.ee/gplink/l/AKdswRuuS1	CL_0000775_naive	neutrophil naive	15	FALSE	FALSE	TRUE	FALSE	FALSE	FALSE	TRUE	FALSE	FALSE	NA	NA
chr7_5505075_A_G	rs6946389	chr7:5544706	7	5505075	15	rs7808849; rs13241226; rs6946389; rs13245207; rs1860882; ; rs2346233; rs2346232; rs12532789; rs73335636; rs12535110; rs11767088; rs11767111	1	FBXL18; FBXL18 ACTB TNRC18 FSCN1 RNF216	https://biit.cs.ut.ee/gplink/l/kHbroItxRl	CL_0002057_IFNg_24h	monocyte IFNg_24h	11	FALSE	FALSE	FALSE	TRUE	FALSE	FALSE	FALSE	FALSE	TRUE	NA	NA
chr7_6464609_T_C	rs73057397	chr7:6504240	7	6464609	1	rs73057397	2	DAGLB KDELR2; KDELR2 DAGLB RAC1 ZDHHC4 FAM220A	https://biit.cs.ut.ee/gplink/l/8RPaa260RS	CL_0000233_naive	platelet naive	214;152	FALSE	FALSE	TRUE	TRUE	TRUE	FALSE	FALSE	TRUE	FALSE	NA	NA
chr7_78044702_T_C	rs201506113	chr7:77674019	7	78044702	1	rs201506113	2	MAGI2; MAGI2 PHTF2 TMEM60 RSBN1L PTPN12	https://biit.cs.ut.ee/gplink/l/oOgqlG-1Qn	CL_0002057_naive	monocyte naive	11;15	FALSE	FALSE	TRUE	TRUE	TRUE	TRUE	FALSE	FALSE	FALSE	NA	NA
chr7_86414805_T_TA	rs397747445	chr7:86044121	7	86414805	134	rs6949132; rs397889994; rs35298742; rs397889761; rs722970; ; rs138278304; rs10223926; rs12668778; rs6955344; rs10251277; rs78357732; rs146133693; rs182592849; rs73384268; rs10266683; rs12154455; rs66462231; rs28656243; rs74545194; rs10264552; rs17324099; rs10257642; rs374599840; rs2708565; rs2536251; rs73386109; rs2708560; rs2536254; rs2708568; rs146354224; rs144926840; rs2536255; rs2536256; rs27…	1	; GRM3 KIAA1324L DMTF1 TMEM243 CROT	https://biit.cs.ut.ee/gplink/l/Ry2JfOsyQf	CL_0002057_LPS_24h	monocyte LPS_24h	10	FALSE	FALSE	TRUE	FALSE	FALSE	FALSE	FALSE	TRUE	FALSE	NA	NA
chr7_88711735_T_TA	rs386410668; rs386410669	chr7:88341049	7	88711735	2	rs62462026; rs386410668; rs386410669	1	; ZNF804B TEX47 STEAP4 SRI ADAM22	https://biit.cs.ut.ee/gplink/l/eudTnbmDRf	CL_0000625_naive	CD8+ T cell naive	40	FALSE	FALSE	FALSE	TRUE	FALSE	FALSE	FALSE	FALSE	TRUE	NA	NA
chr8_107275805_A_G	rs7013390	chr8:108288033	8	107275805	19	rs12542896; rs10086783; rs7009229; rs7013390; rs10955446; rs7842941; rs10709941; rs6469107; rs7845785; rs4357258; rs16876090; rs71524707; rs35611738; rs55736442; rs6981438; rs34397043; rs34977556; rs16876122; rs35899249	1	ANGPT1; ANGPT1 ABRA OXR1 RSPO2 EIF3E	https://biit.cs.ut.ee/gplink/l/f0_GyKcpS4	CL_0000775_naive	neutrophil naive	102	FALSE	FALSE	FALSE	TRUE	TRUE	FALSE	FALSE	FALSE	FALSE	NA	NA
chr8_109174974_G_A	rs66850941	chr8:110187203	8	109174974	23	rs66850941; rs67650612; rs73303256; rs58645331; rs72682635; ; rs67145203; rs1993593; rs6990184; rs7817013; rs113820279; rs61245151; rs16879288; rs112777917; rs113956279; rs111732799; rs67974558; rs72682688; rs16879296; rs16879302; rs16879319	1	; TRHR NUDCD1 ENY2 PKHD1L1 EBAG9	https://biit.cs.ut.ee/gplink/l/AiX7qQgIQY	CL_0000624_naive	CD4+ T cell naive	48	FALSE	FALSE	TRUE	FALSE	FALSE	TRUE	FALSE	FALSE	FALSE	NA	NA
chr8_111338453_G_T	rs55771644	chr8:112350682	8	111338453	71	rs145962429; ; rs62520578; rs55847592; rs11779289; rs55771644; rs62520630; rs55874510; rs4604474; rs4389974; rs7001996; rs11783960; rs11784006; rs12681048; rs4509362; rs62520633; rs4354336; rs62520634; rs4876603; rs531306816; rs62520636; rs62520637; rs62520640; rs4876604; rs1573937; rs34016137; rs11786810; rs1896862; rs989847; rs62520649; rs62520650; rs1835178; rs55692430; rs35987131; rs144529595…	2	; CSMD3 KCNV1 SYBU EBAG9 PKHD1L1	https://biit.cs.ut.ee/gplink/l/caum7YHkTW	CL_0002057_LPS_2h	monocyte LPS_2h	874;283	FALSE	FALSE	FALSE	TRUE	FALSE	FALSE	TRUE	FALSE	TRUE	NA	NA
chr8_128701684_C_G		chr8:129713930	8	128701684	1		5	; MYC GSDMC FAM49B POU5F1B ASAP1	https://biit.cs.ut.ee/gplink/l/DSsGeqqRS5	CL_0002057_IFNg_24h	monocyte IFNg_24h	181;170;51;144;149	FALSE	FALSE	TRUE	TRUE	TRUE	TRUE	FALSE	TRUE	FALSE	NA	NA
chr8_129342797_T_A	rs2568452	chr8:130355043	8	129342797	25	rs2568452; ; rs1835849; rs2099291; rs2568449; rs2579854; rs2579855; rs34626075; rs370065700; rs2568448; rs2568446; rs2719193; rs2568444; rs34397251; rs398009892; rs2719192; rs113004376; rs79358590; rs6999327; rs2436206; rs12056871; rs7003796; rs2568442; rs891837; rs2579859	1	; GSDMC FAM49B ASAP1 ADCY8 MYC	https://biit.cs.ut.ee/gplink/l/HUe3NCuoTa	CL_0002057_LPS_2h	monocyte LPS_2h	18	FALSE	FALSE	FALSE	TRUE	FALSE	FALSE	FALSE	FALSE	TRUE	NA	NA
chr8_133691207_GA_GAA		chr8:134703450	8	133691207	9	rs74746793; ; rs62517457; rs9969510; rs62517458; rs1868433; rs1868431; rs1868429; rs6999345	1	; ST3GAL1 NDRG1 WISP1 TG SLA	https://biit.cs.ut.ee/gplink/l/MO1u2fXwQV	CL_0000775_naive	neutrophil naive	14	FALSE	FALSE	TRUE	FALSE	FALSE	FALSE	FALSE	TRUE	FALSE	NA	NA
chr8_136779695_C_CT		chr8:137791938	8	136779695	76	rs305310; rs90190; rs305313; ; rs11322645; rs398010008; rs305275; rs60293845; rs397789478; rs2318174; rs2577049; rs2577046; rs2577045; rs2249405; rs2582424; rs2610098; rs2318175; rs35096977; rs2582488; rs2582486; rs138319960; rs71298411; rs2582485; rs34199910; rs398010010; rs2610076; rs2610078; rs2613825; rs2610079; rs2247623; rs2610082; rs2247395; rs2582479; rs11166664; rs7460967; rs2262412; rs3…	1	; KHDRBS3 FAM135B COL22A1 ZFAT KCNK9	https://biit.cs.ut.ee/gplink/l/flRFHNT8Th	CL_0002057_LPS_2h	monocyte LPS_2h	49	FALSE	FALSE	FALSE	TRUE	FALSE	FALSE	FALSE	FALSE	TRUE	NA	NA
chr8_138704718_G_T		chr8:139716961	8	138704718	12	rs6997633; rs11780480; rs4243904; rs4074052; ; rs7463922; rs13255858; rs10103039; rs10110090; rs7841761; rs34929697	2	COL22A1; COL22A1 FAM135B KCNK9 TRAPPC9 CHRAC1	https://biit.cs.ut.ee/gplink/l/o9_nDEnHRz	CL_0000775_naive	neutrophil naive	131;121	FALSE	FALSE	TRUE	TRUE	TRUE	FALSE	FALSE	TRUE	FALSE	NA	NA
chr8_17529373_A_AAATC		chr8:17386882	8	17529373	4	rs2517242; ; rs2588223; rs377149116; rs58195705	1	SLC7A2; SLC7A2 PDGFRL MTUS1 MTMR7 VPS37A	https://biit.cs.ut.ee/gplink/l/__x2yoLoS0	CL_0002057_LPS_2h	monocyte LPS_2h	8	FALSE	FALSE	FALSE	TRUE	FALSE	FALSE	FALSE	FALSE	TRUE	NA	NA
chr8_25953353_A_C	rs74408914	chr8:25810869	8	25953353	1	rs74408914	2	EBF2; EBF2 PPP2R2A BNIP3L CDCA2 KCTD9	https://biit.cs.ut.ee/gplink/l/QXmThTkZQ4	CL_0000233_naive	platelet naive	230;51	FALSE	FALSE	TRUE	TRUE	FALSE	TRUE	FALSE	TRUE	FALSE	NA	NA
chr8_28139515_GA_G	rs36105055; rs398086462; rs397891284	chr8:27997032	8	28139515	4	rs3757894; rs36105055; rs398086462; rs397891284; rs17058631; rs59061949	1	ELP3; ELP3 NUGGC SCARA5 PNOC ZNF395	https://biit.cs.ut.ee/gplink/l/rg4Onn2lQq	CL_0002057_LPS_2h	monocyte LPS_2h	6	FALSE	TRUE	FALSE	TRUE	FALSE	FALSE	FALSE	FALSE	TRUE	NA	NA
chr8_31749736_GAT_G	rs35399357; rs746649944; rs145238733; rs397768801	chr8:31607252	8	31749736	47	rs11784088; rs10954810; rs6468060; rs11776163; ; rs11776643; rs7814657; rs73239837; rs62506921; rs556276374; rs771080560; rs57363109; rs35584728; rs7819870; rs6993559; rs141147282; rs62506924; rs7016384; rs4521723; rs7003184; rs11775125; rs11782207; rs73239870; rs11774988; rs7009880; rs11985395; rs62506957; rs7002293; rs6468065; rs11779083; rs35399357; rs746649944; rs145238733; rs397768801; rs113…	1	NRG1; NRG1 WRN PURG TEX15 PPP2CB	https://biit.cs.ut.ee/gplink/l/Q_0U12xYQd	CL_0000624_naive	CD4+ T cell naive	2	FALSE	FALSE	TRUE	FALSE	FALSE	FALSE	TRUE	FALSE	FALSE	NA	NA
chr8_3947927_T_C	rs73509608	chr8:3805449	8	3947927	5	rs73509608; ; rs11779218; rs11785867	1	CSMD1; CSMD1 MYOM2 KBTBD11 ARHGEF10 CLN8	https://biit.cs.ut.ee/gplink/l/O2cI5njgR7	CL_0000236_naive	B cell naive	2	FALSE	FALSE	FALSE	TRUE	FALSE	FALSE	FALSE	FALSE	TRUE	NA	NA
chr8_71835579_G_A	rs11987567	chr8:72747814	8	71835579	1	rs11987567	1	; MSC TRPA1 EYA1 KCNB2 XKR9	https://biit.cs.ut.ee/gplink/l/xzzkNjo1Rv	CL_0002057_LPS_24h	monocyte LPS_24h	114	FALSE	FALSE	FALSE	TRUE	FALSE	FALSE	FALSE	TRUE	FALSE	NA	NA
chr8_77786056_C_T		chr8:78698291	8	77786056	1		1	; PKIA PEX2 ZC2HC1A IL7 ZFHX4	https://biit.cs.ut.ee/gplink/l/OBP7t6rmQa	CL_0002057_IFNg_24h	monocyte IFNg_24h	42	FALSE	FALSE	TRUE	FALSE	FALSE	TRUE	FALSE	FALSE	FALSE	NA	NA
chr9_109832578_C_T		chr9:112594858	9	109832578	5	rs913359; rs2094453; rs7046319; rs6477729;	1	PALM2-AKAP2 PALM2; PALM2-AKAP2 PALM2 AKAP2 PTPN3 C9orf152	https://biit.cs.ut.ee/gplink/l/aoTF9cDOQ1	CL_0002057_naive	monocyte naive	5	FALSE	FALSE	FALSE	TRUE	FALSE	FALSE	FALSE	FALSE	TRUE	NA	NA
chr9_117417308_A_C		chr9:120179586	9	117417308	1		1	; ASTN2 TLR4 TRIM32 PAPPA BRINP1	https://biit.cs.ut.ee/gplink/l/qk_4aVbrRZ	CL_0002057_naive	monocyte naive	1	FALSE	FALSE	FALSE	TRUE	FALSE	FALSE	FALSE	FALSE	TRUE	NA	NA
chr9_123465308_AT_A	rs1465391254; rs60428558	chr9:126227587	9	123465308	17	rs76274475; rs78861713; rs113083622; rs112830034; rs75339791; rs1465391254; rs60428558; rs149353078; rs113925093; rs199500294; ; rs76438231; rs60485679; rs7849651; rs111447646; rs10581266; rs10513428; rs372556098	1	DENND1A; CRB2 DENND1A STRBP RABGAP1 ZBTB26	https://biit.cs.ut.ee/gplink/l/VrjjASWkRW	CL_0002057_IFNg_24h	monocyte IFNg_24h	55	FALSE	FALSE	TRUE	FALSE	FALSE	FALSE	TRUE	FALSE	FALSE	NA	NA
chr9_126717256_T_C	rs62580166	chr9:129479535	9	126717256	2	rs62580166;	1	; LMX1B ZBTB43 ZBTB34 RALGPS1 MVB12B	https://biit.cs.ut.ee/gplink/l/WXX0JzelTx	CL_0000236_naive	B cell naive	10	FALSE	FALSE	TRUE	FALSE	FALSE	TRUE	FALSE	FALSE	FALSE	NA	NA
chr9_19754478_G_A	rs10514825	chr9:19754476	9	19754478	22	rs11794285; rs11790307; rs1327407; rs10514825; rs2383119; rs138187424; rs1394934507; rs74931470; ; rs13291772; rs79568241; rs9802201; rs4977321; rs10811241; rs1359824; rs12115467; rs35736933; rs10811242; rs10964294	7	SLC24A2; SLC24A2 ACER2 RPS6 DENND4C MLLT3	https://biit.cs.ut.ee/gplink/l/xVhwQJ6qTE	CL_0000775_naive	neutrophil naive	20;25;28;27;25;71;5	FALSE	FALSE	TRUE	TRUE	TRUE	TRUE	FALSE	TRUE	TRUE	NA	NA
chr9_20086858_A_G	rs7866455	chr9:20086856	9	20086858	11	rs4490926; rs7872055; rs62550911; rs61625138; rs796369431; rs10964422; rs12346550; rs16937879; rs10811312; rs10811313; rs12342499; rs7866455	1	; MLLT3 SLC24A2 FOCAD ACER2 RPS6	https://biit.cs.ut.ee/gplink/l/I6P_ECyRQb	CL_0002057_LPS_24h	monocyte LPS_24h	28	FALSE	FALSE	FALSE	TRUE	FALSE	FALSE	FALSE	FALSE	TRUE	NA	NA
chr9_20818520_A_G		chr9:20818519	9	20818520	134	rs2151002; rs2183931; ; rs7027599; rs7859871; rs6475474; rs7871361; rs2151003; rs10964729; rs3898946; rs66509579; rs55700678; rs7388989; rs11323627; rs33946145; rs4977760; rs35689918; rs386414625; rs386414626; rs4977579; rs4977779; rs10122724; rs10811421; rs3955234; rs7038206; rs7023980; rs4288451; rs2383164; rs4565546; rs2383165; rs2891153; rs2383166; rs10964755; rs4977811; rs4977812; rs10811427…	12	FOCAD; FOCAD MLLT3 IFNB1 IFNW1 IFNA21	https://biit.cs.ut.ee/gplink/l/Tnz7Ql3-S7	CL_0002057_LPS_24h	monocyte LPS_24h	130;19;9;84;236;187;203;5;55;197;6;165	TRUE	TRUE	TRUE	TRUE	TRUE	TRUE	TRUE	TRUE	TRUE	NA	NA
chr9_24477130_G_A	rs1984582	chr9:24477128	9	24477130	1	rs1984582	1	; ELAVL2 TUSC1 DMRTA1 CAAP1 PLAA	https://biit.cs.ut.ee/gplink/l/bkMOWXFeRL	CL_0000233_naive	platelet naive	2	FALSE	FALSE	TRUE	FALSE	FALSE	FALSE	TRUE	FALSE	FALSE	NA	NA
chr9_27119890_C_CGTGT		chr9:27119888	9	27119890	9	rs618987; rs36203622; rs1355976355; rs374716491; ; rs590310; rs666812; rs679504; rs71480372	1	TEK; TEK IFT74 EQTN PLAA MOB3B	https://biit.cs.ut.ee/gplink/l/PCQcE_cbTZ	CL_0000775_naive	neutrophil naive	12	FALSE	FALSE	FALSE	TRUE	FALSE	FALSE	FALSE	FALSE	TRUE	NA	NA
chr9_27482969_C_T		chr9:27482967	9	27482969	1		2	MOB3B; IFNK MOB3B C9orf72 EQTN TEK	https://biit.cs.ut.ee/gplink/l/AziuZ43zSU	CL_0002057_LPS_24h	monocyte LPS_24h	12;329	FALSE	FALSE	TRUE	TRUE	TRUE	FALSE	FALSE	FALSE	TRUE	NA	NA
chr9_6644925_C_G		chr9:6644925	9	6644925	1		1	GLDC; GLDC KDM4C UHRF2 TPD52L3 IL33	https://biit.cs.ut.ee/gplink/l/0IzUqkwrQL	CL_0002057_LPS_24h	monocyte LPS_24h	22	FALSE	FALSE	TRUE	FALSE	FALSE	FALSE	TRUE	FALSE	FALSE	NA	NA
chr9_68747480_A_G		chr9:71362396	9	68747480	3	; rs13299226; rs34755669; rs779525561	1	PIP5K1B; FAM122A PIP5K1B TMEM252 PGM5 PRKACG	https://biit.cs.ut.ee/gplink/l/grRpftBQQe	CL_0002057_LPS_2h	monocyte LPS_2h	42	FALSE	FALSE	FALSE	TRUE	FALSE	FALSE	FALSE	TRUE	FALSE	NA	NA
chr9_75599109_T_C		chr9:78214025	9	75599109	10	rs1332517; ; rs1002041; rs11144504; rs10869594; rs10869595; rs998974	1	; PCSK5 OSTF1 NMRK1 CARNMT1 C9orf40	https://biit.cs.ut.ee/gplink/l/kniWkhkITa	CL_0000236_naive	B cell naive	94	FALSE	FALSE	TRUE	FALSE	FALSE	TRUE	FALSE	FALSE	FALSE	NA	NA
chr9_85107718_A_T	rs11140861	chr9:87722633	9	85107718	13	; rs35894650; rs761090194; rs145512108; rs374138754; rs10868254; rs7858310; rs10868255; rs11140861; rs72742012; rs11140871	1	; NTRK2 AGTPBP1 SLC28A3 NAA35 GOLM1	https://biit.cs.ut.ee/gplink/l/BoEzyIeYSa	CL_0002057_naive	monocyte naive	2	FALSE	FALSE	FALSE	TRUE	TRUE	FALSE	FALSE	FALSE	FALSE	NA	NA
chr9_86035878_C_A	rs12343086	chr9:88650793	9	86035878	6	rs12343086; rs10651419; rs7023263;	1	GOLM1; GOLM1 NAA35 C9orf153 ISCA1 TUT7	https://biit.cs.ut.ee/gplink/l/coIR0pgSQA	CL_0002057_naive	monocyte naive	4	FALSE	FALSE	FALSE	TRUE	FALSE	FALSE	FALSE	FALSE	TRUE	NA	NA
chr9_90792585_A_G	rs10821502	chr9:93554867	9	90792585	11	rs7023824; rs10821497; rs10993688; rs10821498; rs10993689; rs10821499; rs10821500; rs10821502; rs10821503; rs10821504; rs7041684	1	; SYK DIRAS2 AUH NFIL3 ROR2	https://biit.cs.ut.ee/gplink/l/NYWvt_X3To	CL_0000624_naive	CD4+ T cell naive	33	FALSE	FALSE	FALSE	TRUE	FALSE	FALSE	FALSE	TRUE	FALSE	27863252-GCST004612-EFO_0007986; 27863252-GCST004619-EFO_0007986; 27863252-GCST004622-EFO_0007986	High light scatter reticulocyte percentage of red cells;Reticulocyte fraction of red cells;Reticulocyte count

## Sheet: Field_descriptions
Field	Description
trans_lead	Unique identifier for lead trans-eQTL we use as represenative for the locus (of form "chromosome_position_ref_alt")
rs_id	Rs-identifier for trans_lead (if it was accessible). In case of multiple matches, the rs-ids are separated by a semicolon and a space
GRCh37	Trans lead coordinates in GRCh37 (results of LiftOver).
chr	Chromosomal location of trans_lead
position	Position of trans_lead
nr_snps	Number of variants included in the aggregated credible set for this trans lead
cs_rs_ids	Rs-identifiers of variants in the aggregated credible set, separated by a semicolon and a space. Includes empty space if rs-id was not available
nr_modules	Number of nominally associated modules
closest_genes	Genes closest to the trans lead. If there is a name before semicolon then the trans lead is inside the gene region. The closest 5 genes are shown after semicolon, separated by a space
gp_link	Link to the g:Profiler functional enrichment analysis results showing enrichments for the associated modules.
qtl_group	Cell type/condition identifier of the association. If multiple contexts apply, then these are separated by a comma and a space
qtl_label	Cell type/condition name of the association. If multiple contexts apply, then these are separated by a comma and a space
nr_trans_in_module	Number of genes from the gene-level analysis (FDR 5%) that are included in the module. For multiple modules, the number are separated by a semicolon and a space.
bonferroni	Indicator if the trans-eQTL remains after additional filtering according to the Bonferroni threshold.
byfdr10	Indicator if the trans-eQTL remains after additional filtering according to the Benjamini-Yekutieli FDR 10% threshold.
separate	Indicator if the association was detected from separate co-expression analysis.
integrated	Indicator if the association was detected from integrated co-expression analysis.
funcExplorer	Indicator if the association was detected by funcExplorer co-expression analysis.
ICA	Indicator if the association was detected by ICA co-expression analysis.
PEER	Indicator if the association was detected by PEER co-expression analysis.
PLIER	Indicator if the association was detected by PLIER co-expression analysis.
WGCNA	Indicator if the association was detected by WGCNA co-expression analysis.
trait	Identifiers of GWAS traits that colocalised with the trans-eQTL results (NA if no colocalisation)
trait_name	Names of GWAS traits that colocalised with the trans-eQTL results (NA if no colocalisation).
