# Supplementary material for: Co-expression analysis reveals interpretable gene modules controlled by trans-acting genetic variants
Source: eLife. 2020 Sep 3;9:e58705. doi: 10.7554/eLife.58705 (PMC7470823; doi:10.7554/eLife.58705)
Supplement: Supplementary file 2. [file elife-58705-supp2.xlsx]

## Sheet: Supplementary_file2
meta_id	cl_id2	snp_id	trans_lead	cs_id	position	PIP	Z-score	cs	cl_id	cl_method	approach	qtl_group	chr	lead_pval	lead_FDR	lead_BYFDR	pval_thr	nr_trans_in_cl	nr_gene_trans	cl_size	cis_in_cl	sign_cis_in_cl	fisher_pval	fisher_pval_adj	snp_pos	rs_id
chr1_14348601_G_A	X15.PID_TCPTP_PATHWAY_PLIER_integrated	chr1_14348601_G_A	chr1_14348601_G_A	X15.PID_TCPTP_PATHWAY_PLIER_integrated_CL_0002057_LPS_24h_chr1_14348601_G_A_cs_1	1862	0.961205472850412	5.99289860995599	1	X15.PID_TCPTP_PATHWAY	PLIER	integrated	CL_0002057_LPS_24h	chr1	6.22173024220643e-09	0.0165161549136877	0.343468709028533	5.68181818181818e-10	180	427	602	FALSE	FALSE	2.79648632925442e-158	2.79648632925442e-158	14348601	rs6429651
chr1_165264420_G_A	Cluster_10282_funcExplorer_separate_CL_0000624_naive	chr1_165259233_T_G	chr1_165264420_G_A	Cluster_10282_funcExplorer_separate_CL_0000624_naive_chr1_165264420_G_A_cs_1	1263	0.031056002297239	-4.98266665428326	1	Cluster_10282	funcExplorer	separate	CL_0000624_naive	chr1	3.233097826723e-08	0.314088003435395	1	3.125e-10	5	627	7	FALSE	FALSE	9.01422147492738e-07	1.80284429498548e-06	165259233	rs16841801
chr1_165264420_G_A	Cluster_15712_funcExplorer_separate_CL_0000624_naive	chr1_165259233_T_G	chr1_165264420_G_A	Cluster_15712_funcExplorer_separate_CL_0000624_naive_chr1_165264420_G_A_cs_1	1263	0.00923742747779954	-4.6082834373789	1	Cluster_15712	funcExplorer	separate	CL_0000624_naive	chr1	3.233097826723e-08	0.314088003435395	1	3.125e-10	4	627	5	FALSE	FALSE	6.52248222784295e-06	1.30449644556859e-05	165259233	rs16841801
chr1_165264420_G_A	Cluster_10282_funcExplorer_separate_CL_0000624_naive	chr1_165259290_C_T	chr1_165264420_G_A	Cluster_10282_funcExplorer_separate_CL_0000624_naive_chr1_165264420_G_A_cs_1	1264	0.031056002297239	-4.98266665428326	1	Cluster_10282	funcExplorer	separate	CL_0000624_naive	chr1	3.233097826723e-08	0.314088003435395	1	3.125e-10	5	627	7	FALSE	FALSE	9.01422147492738e-07	1.80284429498548e-06	165259290	rs16841803
chr1_165264420_G_A	Cluster_15712_funcExplorer_separate_CL_0000624_naive	chr1_165259290_C_T	chr1_165264420_G_A	Cluster_15712_funcExplorer_separate_CL_0000624_naive_chr1_165264420_G_A_cs_1	1264	0.00923742747779954	-4.6082834373789	1	Cluster_15712	funcExplorer	separate	CL_0000624_naive	chr1	3.233097826723e-08	0.314088003435395	1	3.125e-10	4	627	5	FALSE	FALSE	6.52248222784295e-06	1.30449644556859e-05	165259290	rs16841803
chr1_165264420_G_A	Cluster_15712_funcExplorer_separate_CL_0000624_naive	chr1_165263103_G_A	chr1_165264420_G_A	Cluster_15712_funcExplorer_separate_CL_0000624_naive_chr1_165264420_G_A_cs_1	1267	0.00923742747779954	-4.6082834373789	1	Cluster_15712	funcExplorer	separate	CL_0000624_naive	chr1	3.233097826723e-08	0.314088003435395	1	3.125e-10	4	627	5	FALSE	FALSE	6.52248222784295e-06	1.30449644556859e-05	165263103	rs35043164
chr1_165264420_G_A	Cluster_10282_funcExplorer_separate_CL_0000624_naive	chr1_165263103_G_A	chr1_165264420_G_A	Cluster_10282_funcExplorer_separate_CL_0000624_naive_chr1_165264420_G_A_cs_1	1267	0.031056002297239	-4.98266665428326	1	Cluster_10282	funcExplorer	separate	CL_0000624_naive	chr1	3.233097826723e-08	0.314088003435395	1	3.125e-10	5	627	7	FALSE	FALSE	9.01422147492738e-07	1.80284429498548e-06	165263103	rs35043164
chr1_165264420_G_A	Cluster_10282_funcExplorer_separate_CL_0000624_naive	chr1_165264420_G_A	chr1_165264420_G_A	Cluster_10282_funcExplorer_separate_CL_0000624_naive_chr1_165264420_G_A_cs_1	1271	0.652956373625394	-5.70433709045551	1	Cluster_10282	funcExplorer	separate	CL_0000624_naive	chr1	3.233097826723e-08	0.314088003435395	1	3.125e-10	5	627	7	FALSE	FALSE	9.01422147492738e-07	1.80284429498548e-06	165264420	rs34745858
chr1_165264420_G_A	Cluster_15712_funcExplorer_separate_CL_0000624_naive	chr1_165264420_G_A	chr1_165264420_G_A	Cluster_15712_funcExplorer_separate_CL_0000624_naive_chr1_165264420_G_A_cs_1	1271	0.869553890766102	-5.70134770508704	1	Cluster_15712	funcExplorer	separate	CL_0000624_naive	chr1	3.233097826723e-08	0.314088003435395	1	3.125e-10	4	627	5	FALSE	FALSE	6.52248222784295e-06	1.30449644556859e-05	165264420	rs34745858
chr1_165264420_G_A	Cluster_10282_funcExplorer_separate_CL_0000624_naive	chr1_165271810_GT_G	chr1_165264420_G_A	Cluster_10282_funcExplorer_separate_CL_0000624_naive_chr1_165264420_G_A_cs_1	1286	0.031056002297239	-4.98266665428326	1	Cluster_10282	funcExplorer	separate	CL_0000624_naive	chr1	3.233097826723e-08	0.314088003435395	1	3.125e-10	5	627	7	FALSE	FALSE	9.01422147492738e-07	1.80284429498548e-06	165271810	rs34732875
chr1_165264420_G_A	Cluster_15712_funcExplorer_separate_CL_0000624_naive	chr1_165271810_GT_G	chr1_165264420_G_A	Cluster_15712_funcExplorer_separate_CL_0000624_naive_chr1_165264420_G_A_cs_1	1286	0.00923742747779954	-4.6082834373789	1	Cluster_15712	funcExplorer	separate	CL_0000624_naive	chr1	3.233097826723e-08	0.314088003435395	1	3.125e-10	4	627	5	FALSE	FALSE	6.52248222784295e-06	1.30449644556859e-05	165271810	rs34732875
chr1_165264420_G_A	Cluster_15712_funcExplorer_separate_CL_0000624_naive	chr1_165272035_A_G	chr1_165264420_G_A	Cluster_15712_funcExplorer_separate_CL_0000624_naive_chr1_165264420_G_A_cs_1	1287	0.00923742747779954	-4.6082834373789	1	Cluster_15712	funcExplorer	separate	CL_0000624_naive	chr1	3.233097826723e-08	0.314088003435395	1	3.125e-10	4	627	5	FALSE	FALSE	6.52248222784295e-06	1.30449644556859e-05	165272035	rs59911715
chr1_165264420_G_A	Cluster_10282_funcExplorer_separate_CL_0000624_naive	chr1_165272035_A_G	chr1_165264420_G_A	Cluster_10282_funcExplorer_separate_CL_0000624_naive_chr1_165264420_G_A_cs_1	1287	0.031056002297239	-4.98266665428326	1	Cluster_10282	funcExplorer	separate	CL_0000624_naive	chr1	3.233097826723e-08	0.314088003435395	1	3.125e-10	5	627	7	FALSE	FALSE	9.01422147492738e-07	1.80284429498548e-06	165272035	rs59911715
chr1_165264420_G_A	Cluster_10282_funcExplorer_separate_CL_0000624_naive	chr1_165272632_A_G	chr1_165264420_G_A	Cluster_10282_funcExplorer_separate_CL_0000624_naive_chr1_165264420_G_A_cs_1	1289	0.031056002297239	-4.98266665428326	1	Cluster_10282	funcExplorer	separate	CL_0000624_naive	chr1	3.233097826723e-08	0.314088003435395	1	3.125e-10	5	627	7	FALSE	FALSE	9.01422147492738e-07	1.80284429498548e-06	165272632	rs12562556
chr1_165264420_G_A	Cluster_15712_funcExplorer_separate_CL_0000624_naive	chr1_165272632_A_G	chr1_165264420_G_A	Cluster_15712_funcExplorer_separate_CL_0000624_naive_chr1_165264420_G_A_cs_1	1289	0.00923742747779954	-4.6082834373789	1	Cluster_15712	funcExplorer	separate	CL_0000624_naive	chr1	3.233097826723e-08	0.314088003435395	1	3.125e-10	4	627	5	FALSE	FALSE	6.52248222784295e-06	1.30449644556859e-05	165272632	rs12562556
chr1_165264420_G_A	Cluster_10282_funcExplorer_separate_CL_0000624_naive	chr1_165272895_G_A	chr1_165264420_G_A	Cluster_10282_funcExplorer_separate_CL_0000624_naive_chr1_165264420_G_A_cs_1	1290	0.031056002297239	-4.98266665428326	1	Cluster_10282	funcExplorer	separate	CL_0000624_naive	chr1	3.233097826723e-08	0.314088003435395	1	3.125e-10	5	627	7	FALSE	FALSE	9.01422147492738e-07	1.80284429498548e-06	165272895	rs12563462
chr1_165264420_G_A	Cluster_15712_funcExplorer_separate_CL_0000624_naive	chr1_165272895_G_A	chr1_165264420_G_A	Cluster_15712_funcExplorer_separate_CL_0000624_naive_chr1_165264420_G_A_cs_1	1290	0.00923742747779954	-4.6082834373789	1	Cluster_15712	funcExplorer	separate	CL_0000624_naive	chr1	3.233097826723e-08	0.314088003435395	1	3.125e-10	4	627	5	FALSE	FALSE	6.52248222784295e-06	1.30449644556859e-05	165272895	rs12563462
chr1_165264420_G_A	Cluster_10282_funcExplorer_separate_CL_0000624_naive	chr1_165291933_G_A	chr1_165264420_G_A	Cluster_10282_funcExplorer_separate_CL_0000624_naive_chr1_165264420_G_A_cs_1	1344	0.0164798217555897	-4.81662972668672	1	Cluster_10282	funcExplorer	separate	CL_0000624_naive	chr1	3.233097826723e-08	0.314088003435395	1	3.125e-10	5	627	7	FALSE	FALSE	9.01422147492738e-07	1.80284429498548e-06	165291933	rs78989175
chr1_165264420_G_A	Cluster_10282_funcExplorer_separate_CL_0000624_naive	chr1_165293842_T_C	chr1_165264420_G_A	Cluster_10282_funcExplorer_separate_CL_0000624_naive_chr1_165264420_G_A_cs_1	1349	0.0164798217555899	-4.81662972668672	1	Cluster_10282	funcExplorer	separate	CL_0000624_naive	chr1	3.233097826723e-08	0.314088003435395	1	3.125e-10	5	627	7	FALSE	FALSE	9.01422147492738e-07	1.80284429498548e-06	165293842	rs35695490
chr1_165264420_G_A	Cluster_10282_funcExplorer_separate_CL_0000624_naive	chr1_165294453_G_A	chr1_165264420_G_A	Cluster_10282_funcExplorer_separate_CL_0000624_naive_chr1_165264420_G_A_cs_1	1351	0.0164798217555899	-4.81662972668672	1	Cluster_10282	funcExplorer	separate	CL_0000624_naive	chr1	3.233097826723e-08	0.314088003435395	1	3.125e-10	5	627	7	FALSE	FALSE	9.01422147492738e-07	1.80284429498548e-06	165294453	rs59094364
chr1_165264420_G_A	Cluster_10282_funcExplorer_separate_CL_0000624_naive	chr1_165294680_C_T	chr1_165264420_G_A	Cluster_10282_funcExplorer_separate_CL_0000624_naive_chr1_165264420_G_A_cs_1	1353	0.0164798217555899	-4.81662972668672	1	Cluster_10282	funcExplorer	separate	CL_0000624_naive	chr1	3.233097826723e-08	0.314088003435395	1	3.125e-10	5	627	7	FALSE	FALSE	9.01422147492738e-07	1.80284429498548e-06	165294680
chr1_165264420_G_A	Cluster_15712_funcExplorer_separate_CL_0000624_naive	chr1_165305347_A_G	chr1_165264420_G_A	Cluster_15712_funcExplorer_separate_CL_0000624_naive_chr1_165264420_G_A_cs_1	1379	0.0208016415036394	-4.84316483393817	1	Cluster_15712	funcExplorer	separate	CL_0000624_naive	chr1	3.233097826723e-08	0.314088003435395	1	3.125e-10	4	627	5	FALSE	FALSE	6.52248222784295e-06	1.30449644556859e-05	165305347	rs35980722
chr1_165264420_G_A	Cluster_10282_funcExplorer_separate_CL_0000624_naive	chr1_165305347_A_G	chr1_165264420_G_A	Cluster_10282_funcExplorer_separate_CL_0000624_naive_chr1_165264420_G_A_cs_1	1379	0.0224845126803502	-4.90370422789216	1	Cluster_10282	funcExplorer	separate	CL_0000624_naive	chr1	3.233097826723e-08	0.314088003435395	1	3.125e-10	5	627	7	FALSE	FALSE	9.01422147492738e-07	1.80284429498548e-06	165305347	rs35980722
chr1_165264420_G_A	Cluster_10282_funcExplorer_separate_CL_0000624_naive	chr1_165307652_C_T	chr1_165264420_G_A	Cluster_10282_funcExplorer_separate_CL_0000624_naive_chr1_165264420_G_A_cs_1	1383	0.0224845126803502	-4.90370422789216	1	Cluster_10282	funcExplorer	separate	CL_0000624_naive	chr1	3.233097826723e-08	0.314088003435395	1	3.125e-10	5	627	7	FALSE	FALSE	9.01422147492738e-07	1.80284429498548e-06	165307652
chr1_165264420_G_A	Cluster_15712_funcExplorer_separate_CL_0000624_naive	chr1_165307652_C_T	chr1_165264420_G_A	Cluster_15712_funcExplorer_separate_CL_0000624_naive_chr1_165264420_G_A_cs_1	1383	0.0208016415036394	-4.84316483393817	1	Cluster_15712	funcExplorer	separate	CL_0000624_naive	chr1	3.233097826723e-08	0.314088003435395	1	3.125e-10	4	627	5	FALSE	FALSE	6.52248222784295e-06	1.30449644556859e-05	165307652
chr1_1993370_C_G	IC82_ICA_integrated	chr1_1993346_G_A	chr1_1993370_C_G	IC82_ICA_integrated_CL_0000624_naive_chr1_1993370_C_G_cs_1	852	0.149601209473696	5.98601455161183	1	IC82	ICA	integrated	CL_0000624_naive	chr1	3.72727381588222e-10	0.434741584427727	1	2.94117647058824e-10	29	1036	965	FALSE	FALSE	0.999971641817439	0.999971641817439	1993346
chr1_1993370_C_G	IC82_ICA_integrated	chr1_1993370_C_G	chr1_1993370_C_G	IC82_ICA_integrated_CL_0000624_naive_chr1_1993370_C_G_cs_1	853	0.852719843024412	6.36362132157286	1	IC82	ICA	integrated	CL_0000624_naive	chr1	3.72727381588222e-10	0.434741584427727	1	2.94117647058824e-10	29	1036	965	FALSE	FALSE	0.999971641817439	0.999971641817439	1993370
chr1_20695138_G_A	MEdarkolivegreen_WGCNA_integrated	chr1_20695138_G_A	chr1_20695138_G_A	MEdarkolivegreen_WGCNA_integrated_CL_0000236_naive_chr1_20695138_G_A_cs_1	1672	0.995089248041163	5.80981052100958	1	MEdarkolivegreen	WGCNA	integrated	CL_0000236_naive	chr1	1.41263538176539e-08	0.991539355101149	1	1e-09	8	577	72	FALSE	FALSE	0.00183792209342653	0.00183792209342653	20695138
chr1_225949764_A_G	Cluster_8817_funcExplorer_separate_CL_0000775_naive	chr1_225947432_A_C	chr1_225949764_A_G	Cluster_8817_funcExplorer_separate_CL_0000775_naive_chr1_225949764_A_G_cs_1	1255	0.225006704799849	-5.63634166190616	1	Cluster_8817	funcExplorer	separate	CL_0000775_naive	chr1	3.97419290035633e-08	0.115296543238198	1	3.54609929078014e-10	3	100	26	FALSE	FALSE	0.000370799231036761	0.000370799231036761	225947432	rs2038393
chr1_225949764_A_G	Cluster_8817_funcExplorer_separate_CL_0000775_naive	chr1_225947864_C_T	chr1_225949764_A_G	Cluster_8817_funcExplorer_separate_CL_0000775_naive_chr1_225949764_A_G_cs_1	1256	0.0722155731516292	-5.35419463169906	1	Cluster_8817	funcExplorer	separate	CL_0000775_naive	chr1	3.97419290035633e-08	0.115296543238198	1	3.54609929078014e-10	3	100	26	FALSE	FALSE	0.000370799231036761	0.000370799231036761	225947864	rs72755002
chr1_225949764_A_G	Cluster_8817_funcExplorer_separate_CL_0000775_naive	chr1_225948903_G_A	chr1_225949764_A_G	Cluster_8817_funcExplorer_separate_CL_0000775_naive_chr1_225949764_A_G_cs_1	1257	0.0722155731516292	-5.35419463169906	1	Cluster_8817	funcExplorer	separate	CL_0000775_naive	chr1	3.97419290035633e-08	0.115296543238198	1	3.54609929078014e-10	3	100	26	FALSE	FALSE	0.000370799231036761	0.000370799231036761	225948903
chr1_225949764_A_G	Cluster_8817_funcExplorer_separate_CL_0000775_naive	chr1_225949764_A_G	chr1_225949764_A_G	Cluster_8817_funcExplorer_separate_CL_0000775_naive_chr1_225949764_A_G_cs_1	1258	0.492084532155222	-5.7656716922505	1	Cluster_8817	funcExplorer	separate	CL_0000775_naive	chr1	3.97419290035633e-08	0.115296543238198	1	3.54609929078014e-10	3	100	26	FALSE	FALSE	0.000370799231036761	0.000370799231036761	225949764
chr1_225949764_A_G	Cluster_8817_funcExplorer_separate_CL_0000775_naive	chr1_225952506_C_T	chr1_225949764_A_G	Cluster_8817_funcExplorer_separate_CL_0000775_naive_chr1_225949764_A_G_cs_1	1260	0.0722155731516292	-5.35419463169906	1	Cluster_8817	funcExplorer	separate	CL_0000775_naive	chr1	3.97419290035633e-08	0.115296543238198	1	3.54609929078014e-10	3	100	26	FALSE	FALSE	0.000370799231036761	0.000370799231036761	225952506	rs56150046
chr1_225949764_A_G	Cluster_8817_funcExplorer_separate_CL_0000775_naive	chr1_225955648_G_C	chr1_225949764_A_G	Cluster_8817_funcExplorer_separate_CL_0000775_naive_chr1_225949764_A_G_cs_1	1261	0.0769032325329253	-5.35445537368196	1	Cluster_8817	funcExplorer	separate	CL_0000775_naive	chr1	3.97419290035633e-08	0.115296543238198	1	3.54609929078014e-10	3	100	26	FALSE	FALSE	0.000370799231036761	0.000370799231036761	225955648
chr1_233677336_C_T	IC91_ICA_separate_CL_0000625_naive	chr1_233660541_T_C	chr1_233677336_C_T	IC91_ICA_separate_CL_0000625_naive_chr1_233677336_C_T_cs_1	1480	0.206203224322635	5.28470574545526	1	IC91	ICA	separate	CL_0000625_naive	chr1	3.27291805015859e-08	0.967721164431214	1	4.31034482758621e-10	26	727	740	FALSE	FALSE	0.761765733211162	0.761765733211162	233660541	rs12117994
chr1_233677336_C_T	IC91_ICA_separate_CL_0000625_naive	chr1_233677336_C_T	chr1_233677336_C_T	IC91_ICA_separate_CL_0000625_naive_chr1_233677336_C_T_cs_1	1522	0.765031039493718	5.55055615900795	1	IC91	ICA	separate	CL_0000625_naive	chr1	3.27291805015859e-08	0.967721164431214	1	4.31034482758621e-10	26	727	740	FALSE	FALSE	0.761765733211162	0.761765733211162	233677336	rs12140434
chr1_240734551_T_A	Cluster_13921_funcExplorer_separate_CL_0002057_LPS_2h	chr1_240734551_T_A	chr1_240734551_T_A	Cluster_13921_funcExplorer_separate_CL_0002057_LPS_2h_chr1_240734551_T_A_cs_1	1593	0.999109290714145	-5.7580752063011	1	Cluster_13921	funcExplorer	separate	CL_0002057_LPS_2h	chr1	4.45482943635692e-08	0.0169581647584588	0.363726964562289	2.9585798816568e-10	5	172	6	FALSE	FALSE	4.02878279849909e-10	4.02878279849909e-10	240734551	rs79875984
chr1_243466843_G_A	IC41_ICA_integrated	chr1_243425299_C_T	chr1_243466843_G_A	IC41_ICA_integrated_CL_0000233_naive_chr1_243466843_G_A_cs_1	683	0.0252216875039781	5.02635051128545	1	IC41	ICA	integrated	CL_0000233_naive	chr1	4.55182193537784e-08	0.779177621445833	1	2.94117647058824e-10	21	732	965	FALSE	FALSE	0.999476347034476	0.999476347034476	243425299	rs7513566
chr1_243466843_G_A	IC41_ICA_integrated	chr1_243426211_G_A	chr1_243466843_G_A	IC41_ICA_integrated_CL_0000233_naive_chr1_243466843_G_A_cs_1	685	0.0252216875039781	5.02635051128545	1	IC41	ICA	integrated	CL_0000233_naive	chr1	4.55182193537784e-08	0.779177621445833	1	2.94117647058824e-10	21	732	965	FALSE	FALSE	0.999476347034476	0.999476347034476	243426211	rs7538558
chr1_243466843_G_A	IC41_ICA_integrated	chr1_243429078_G_A	chr1_243466843_G_A	IC41_ICA_integrated_CL_0000233_naive_chr1_243466843_G_A_cs_1	687	0.0252216875039781	5.02635051128545	1	IC41	ICA	integrated	CL_0000233_naive	chr1	4.55182193537784e-08	0.779177621445833	1	2.94117647058824e-10	21	732	965	FALSE	FALSE	0.999476347034476	0.999476347034476	243429078	rs12136239
chr1_243466843_G_A	IC41_ICA_integrated	chr1_243429421_AT_A	chr1_243466843_G_A	IC41_ICA_integrated_CL_0000233_naive_chr1_243466843_G_A_cs_1	690	0.0252216875039781	5.02635051128545	1	IC41	ICA	integrated	CL_0000233_naive	chr1	4.55182193537784e-08	0.779177621445833	1	2.94117647058824e-10	21	732	965	FALSE	FALSE	0.999476347034476	0.999476347034476	243429421	rs71668525
chr1_243466843_G_A	IC41_ICA_integrated	chr1_243429841_A_G	chr1_243466843_G_A	IC41_ICA_integrated_CL_0000233_naive_chr1_243466843_G_A_cs_1	691	0.0252216875039781	5.02635051128545	1	IC41	ICA	integrated	CL_0000233_naive	chr1	4.55182193537784e-08	0.779177621445833	1	2.94117647058824e-10	21	732	965	FALSE	FALSE	0.999476347034476	0.999476347034476	243429841	rs6669127
chr1_243466843_G_A	IC41_ICA_integrated	chr1_243430358_C_A	chr1_243466843_G_A	IC41_ICA_integrated_CL_0000233_naive_chr1_243466843_G_A_cs_1	692	0.0252216875039781	5.02635051128545	1	IC41	ICA	integrated	CL_0000233_naive	chr1	4.55182193537784e-08	0.779177621445833	1	2.94117647058824e-10	21	732	965	FALSE	FALSE	0.999476347034476	0.999476347034476	243430358	rs12049318
chr1_243466843_G_A	IC41_ICA_integrated	chr1_243430900_G_A	chr1_243466843_G_A	IC41_ICA_integrated_CL_0000233_naive_chr1_243466843_G_A_cs_1	693	0.0252216875039781	5.02635051128545	1	IC41	ICA	integrated	CL_0000233_naive	chr1	4.55182193537784e-08	0.779177621445833	1	2.94117647058824e-10	21	732	965	FALSE	FALSE	0.999476347034476	0.999476347034476	243430900	rs12138272
chr1_243466843_G_A	IC41_ICA_integrated	chr1_243431362_G_C	chr1_243466843_G_A	IC41_ICA_integrated_CL_0000233_naive_chr1_243466843_G_A_cs_1	695	0.0252216875039781	5.02635051128545	1	IC41	ICA	integrated	CL_0000233_naive	chr1	4.55182193537784e-08	0.779177621445833	1	2.94117647058824e-10	21	732	965	FALSE	FALSE	0.999476347034476	0.999476347034476	243431362	rs7537757
chr1_243466843_G_A	IC41_ICA_integrated	chr1_243432511_G_A	chr1_243466843_G_A	IC41_ICA_integrated_CL_0000233_naive_chr1_243466843_G_A_cs_1	698	0.0252216875039781	5.02635051128545	1	IC41	ICA	integrated	CL_0000233_naive	chr1	4.55182193537784e-08	0.779177621445833	1	2.94117647058824e-10	21	732	965	FALSE	FALSE	0.999476347034476	0.999476347034476	243432511	rs10927017
chr1_243466843_G_A	IC41_ICA_integrated	chr1_243432929_G_A	chr1_243466843_G_A	IC41_ICA_integrated_CL_0000233_naive_chr1_243466843_G_A_cs_1	699	0.0252216875039781	5.02635051128545	1	IC41	ICA	integrated	CL_0000233_naive	chr1	4.55182193537784e-08	0.779177621445833	1	2.94117647058824e-10	21	732	965	FALSE	FALSE	0.999476347034476	0.999476347034476	243432929	rs12140393
chr1_243466843_G_A	IC41_ICA_integrated	chr1_243432982_G_A	chr1_243466843_G_A	IC41_ICA_integrated_CL_0000233_naive_chr1_243466843_G_A_cs_1	700	0.0252216875039781	5.02635051128545	1	IC41	ICA	integrated	CL_0000233_naive	chr1	4.55182193537784e-08	0.779177621445833	1	2.94117647058824e-10	21	732	965	FALSE	FALSE	0.999476347034476	0.999476347034476	243432982	rs12140431
chr1_243466843_G_A	IC41_ICA_integrated	chr1_243433069_C_T	chr1_243466843_G_A	IC41_ICA_integrated_CL_0000233_naive_chr1_243466843_G_A_cs_1	702	0.0252216875039781	5.02635051128545	1	IC41	ICA	integrated	CL_0000233_naive	chr1	4.55182193537784e-08	0.779177621445833	1	2.94117647058824e-10	21	732	965	FALSE	FALSE	0.999476347034476	0.999476347034476	243433069	rs12118439
chr1_243466843_G_A	IC41_ICA_integrated	chr1_243433926_G_A	chr1_243466843_G_A	IC41_ICA_integrated_CL_0000233_naive_chr1_243466843_G_A_cs_1	703	0.0252216875039781	5.02635051128545	1	IC41	ICA	integrated	CL_0000233_naive	chr1	4.55182193537784e-08	0.779177621445833	1	2.94117647058824e-10	21	732	965	FALSE	FALSE	0.999476347034476	0.999476347034476	243433926	rs12039979
chr1_243466843_G_A	IC41_ICA_integrated	chr1_243435691_C_T	chr1_243466843_G_A	IC41_ICA_integrated_CL_0000233_naive_chr1_243466843_G_A_cs_1	706	0.0204717955638176	4.97622421355432	1	IC41	ICA	integrated	CL_0000233_naive	chr1	4.55182193537784e-08	0.779177621445833	1	2.94117647058824e-10	21	732	965	FALSE	FALSE	0.999476347034476	0.999476347034476	243435691	rs12049124
chr1_243466843_G_A	IC41_ICA_integrated	chr1_243436167_CT_C	chr1_243466843_G_A	IC41_ICA_integrated_CL_0000233_naive_chr1_243466843_G_A_cs_1	708	0.0134303370396202	4.80781682309871	1	IC41	ICA	integrated	CL_0000233_naive	chr1	4.55182193537784e-08	0.779177621445833	1	2.94117647058824e-10	21	732	965	FALSE	FALSE	0.999476347034476	0.999476347034476	243436167	rs113227267
chr1_243466843_G_A	IC41_ICA_integrated	chr1_243436899_G_A	chr1_243466843_G_A	IC41_ICA_integrated_CL_0000233_naive_chr1_243466843_G_A_cs_1	709	0.0204717955638176	4.97622421355432	1	IC41	ICA	integrated	CL_0000233_naive	chr1	4.55182193537784e-08	0.779177621445833	1	2.94117647058824e-10	21	732	965	FALSE	FALSE	0.999476347034476	0.999476347034476	243436899
chr1_243466843_G_A	IC41_ICA_integrated	chr1_243437432_T_C	chr1_243466843_G_A	IC41_ICA_integrated_CL_0000233_naive_chr1_243466843_G_A_cs_1	710	0.0204717955638176	4.97622421355432	1	IC41	ICA	integrated	CL_0000233_naive	chr1	4.55182193537784e-08	0.779177621445833	1	2.94117647058824e-10	21	732	965	FALSE	FALSE	0.999476347034476	0.999476347034476	243437432	rs10927019
chr1_243466843_G_A	IC41_ICA_integrated	chr1_243437661_C_T	chr1_243466843_G_A	IC41_ICA_integrated_CL_0000233_naive_chr1_243466843_G_A_cs_1	711	0.0204717955638176	4.97622421355432	1	IC41	ICA	integrated	CL_0000233_naive	chr1	4.55182193537784e-08	0.779177621445833	1	2.94117647058824e-10	21	732	965	FALSE	FALSE	0.999476347034476	0.999476347034476	243437661	rs12117986
chr1_243466843_G_A	IC41_ICA_integrated	chr1_243437754_G_A	chr1_243466843_G_A	IC41_ICA_integrated_CL_0000233_naive_chr1_243466843_G_A_cs_1	712	0.0204717955638176	4.97622421355432	1	IC41	ICA	integrated	CL_0000233_naive	chr1	4.55182193537784e-08	0.779177621445833	1	2.94117647058824e-10	21	732	965	FALSE	FALSE	0.999476347034476	0.999476347034476	243437754	rs12140016
chr1_243466843_G_A	IC41_ICA_integrated	chr1_243438288_A_G	chr1_243466843_G_A	IC41_ICA_integrated_CL_0000233_naive_chr1_243466843_G_A_cs_1	713	0.0204717955638176	4.97622421355432	1	IC41	ICA	integrated	CL_0000233_naive	chr1	4.55182193537784e-08	0.779177621445833	1	2.94117647058824e-10	21	732	965	FALSE	FALSE	0.999476347034476	0.999476347034476	243438288	rs59653451
chr1_243466843_G_A	IC41_ICA_integrated	chr1_243438633_C_T	chr1_243466843_G_A	IC41_ICA_integrated_CL_0000233_naive_chr1_243466843_G_A_cs_1	715	0.0204717955638176	4.97622421355432	1	IC41	ICA	integrated	CL_0000233_naive	chr1	4.55182193537784e-08	0.779177621445833	1	2.94117647058824e-10	21	732	965	FALSE	FALSE	0.999476347034476	0.999476347034476	243438633
chr1_243466843_G_A	IC41_ICA_integrated	chr1_243439348_C_G	chr1_243466843_G_A	IC41_ICA_integrated_CL_0000233_naive_chr1_243466843_G_A_cs_1	717	0.0204717955638176	4.97622421355432	1	IC41	ICA	integrated	CL_0000233_naive	chr1	4.55182193537784e-08	0.779177621445833	1	2.94117647058824e-10	21	732	965	FALSE	FALSE	0.999476347034476	0.999476347034476	243439348	rs7524530
chr1_243466843_G_A	IC41_ICA_integrated	chr1_243439830_A_G	chr1_243466843_G_A	IC41_ICA_integrated_CL_0000233_naive_chr1_243466843_G_A_cs_1	718	0.0204717955638176	4.97622421355432	1	IC41	ICA	integrated	CL_0000233_naive	chr1	4.55182193537784e-08	0.779177621445833	1	2.94117647058824e-10	21	732	965	FALSE	FALSE	0.999476347034476	0.999476347034476	243439830	rs6685276
chr1_243466843_G_A	IC41_ICA_integrated	chr1_243440572_T_C	chr1_243466843_G_A	IC41_ICA_integrated_CL_0000233_naive_chr1_243466843_G_A_cs_1	719	0.0204717955638176	4.97622421355432	1	IC41	ICA	integrated	CL_0000233_naive	chr1	4.55182193537784e-08	0.779177621445833	1	2.94117647058824e-10	21	732	965	FALSE	FALSE	0.999476347034476	0.999476347034476	243440572	rs11809721
chr1_243466843_G_A	IC41_ICA_integrated	chr1_243441431_C_G	chr1_243466843_G_A	IC41_ICA_integrated_CL_0000233_naive_chr1_243466843_G_A_cs_1	720	0.0204717955638176	4.97622421355432	1	IC41	ICA	integrated	CL_0000233_naive	chr1	4.55182193537784e-08	0.779177621445833	1	2.94117647058824e-10	21	732	965	FALSE	FALSE	0.999476347034476	0.999476347034476	243441431	rs61833161
chr1_243466843_G_A	IC41_ICA_integrated	chr1_243445365_A_G	chr1_243466843_G_A	IC41_ICA_integrated_CL_0000233_naive_chr1_243466843_G_A_cs_1	726	0.0204717955638176	4.97622421355432	1	IC41	ICA	integrated	CL_0000233_naive	chr1	4.55182193537784e-08	0.779177621445833	1	2.94117647058824e-10	21	732	965	FALSE	FALSE	0.999476347034476	0.999476347034476	243445365	rs6702982
chr1_243466843_G_A	IC41_ICA_integrated	chr1_243445531_G_C	chr1_243466843_G_A	IC41_ICA_integrated_CL_0000233_naive_chr1_243466843_G_A_cs_1	727	0.0204717955638176	4.97622421355432	1	IC41	ICA	integrated	CL_0000233_naive	chr1	4.55182193537784e-08	0.779177621445833	1	2.94117647058824e-10	21	732	965	FALSE	FALSE	0.999476347034476	0.999476347034476	243445531
chr1_243466843_G_A	IC41_ICA_integrated	chr1_243447964_G_A	chr1_243466843_G_A	IC41_ICA_integrated_CL_0000233_naive_chr1_243466843_G_A_cs_1	730	0.0239735124855502	5.05149643933353	1	IC41	ICA	integrated	CL_0000233_naive	chr1	4.55182193537784e-08	0.779177621445833	1	2.94117647058824e-10	21	732	965	FALSE	FALSE	0.999476347034476	0.999476347034476	243447964	rs4403617
chr1_243466843_G_A	IC41_ICA_integrated	chr1_243450446_G_A	chr1_243466843_G_A	IC41_ICA_integrated_CL_0000233_naive_chr1_243466843_G_A_cs_1	733	0.0133025416143193	4.8439124200287	1	IC41	ICA	integrated	CL_0000233_naive	chr1	4.55182193537784e-08	0.779177621445833	1	2.94117647058824e-10	21	732	965	FALSE	FALSE	0.999476347034476	0.999476347034476	243450446	rs11800122
chr1_243466843_G_A	IC41_ICA_integrated	chr1_243450532_T_C	chr1_243466843_G_A	IC41_ICA_integrated_CL_0000233_naive_chr1_243466843_G_A_cs_1	734	0.0133025416143193	4.8439124200287	1	IC41	ICA	integrated	CL_0000233_naive	chr1	4.55182193537784e-08	0.779177621445833	1	2.94117647058824e-10	21	732	965	FALSE	FALSE	0.999476347034476	0.999476347034476	243450532	rs57753663
chr1_243466843_G_A	IC41_ICA_integrated	chr1_243451403_C_G	chr1_243466843_G_A	IC41_ICA_integrated_CL_0000233_naive_chr1_243466843_G_A_cs_1	737	0.00875417518202393	4.35282536706597	1	IC41	ICA	integrated	CL_0000233_naive	chr1	4.55182193537784e-08	0.779177621445833	1	2.94117647058824e-10	21	732	965	FALSE	FALSE	0.999476347034476	0.999476347034476	243451403	rs12127073
chr1_243466843_G_A	IC41_ICA_integrated	chr1_243452404_GATCTC_G	chr1_243466843_G_A	IC41_ICA_integrated_CL_0000233_naive_chr1_243466843_G_A_cs_1	742	0.0262417750603521	5.03180744710008	1	IC41	ICA	integrated	CL_0000233_naive	chr1	4.55182193537784e-08	0.779177621445833	1	2.94117647058824e-10	21	732	965	FALSE	FALSE	0.999476347034476	0.999476347034476	243452404	rs111541523; rs772424109; rs778278394
chr1_243466843_G_A	IC41_ICA_integrated	chr1_243458965_TGTG_T	chr1_243466843_G_A	IC41_ICA_integrated_CL_0000233_naive_chr1_243466843_G_A_cs_1	759	0.021575619948299	4.95333813024939	1	IC41	ICA	integrated	CL_0000233_naive	chr1	4.55182193537784e-08	0.779177621445833	1	2.94117647058824e-10	21	732	965	FALSE	FALSE	0.999476347034476	0.999476347034476	243458965	rs67486440; rs71777064
chr1_243466843_G_A	IC41_ICA_integrated	chr1_243466843_G_A	chr1_243466843_G_A	IC41_ICA_integrated_CL_0000233_naive_chr1_243466843_G_A_cs_1	764	0.447795135256948	5.74358411987026	1	IC41	ICA	integrated	CL_0000233_naive	chr1	4.55182193537784e-08	0.779177621445833	1	2.94117647058824e-10	21	732	965	FALSE	FALSE	0.999476347034476	0.999476347034476	243466843	rs10927024
chr1_34258327_T_C	X59.KEGG_PROPANOATE_METABOLISM_PLIER_integrated	chr1_34242474_T_C	chr1_34258327_T_C	X59.KEGG_PROPANOATE_METABOLISM_PLIER_integrated_CL_0000775_naive_chr1_34258327_T_C_cs_1	1211	0.128952971912445	-5.60207572625968	1	X59.KEGG_PROPANOATE_METABOLISM	PLIER	integrated	CL_0000775_naive	chr1	1.65144956757756e-08	0.831705982628507	1	5.68181818181818e-10	5	81	874	FALSE	FALSE	0.341249753199135	0.341249753199135	34242474	rs6693301
chr1_34258327_T_C	X59.KEGG_PROPANOATE_METABOLISM_PLIER_integrated	chr1_34246511_A_C	chr1_34258327_T_C	X59.KEGG_PROPANOATE_METABOLISM_PLIER_integrated_CL_0000775_naive_chr1_34258327_T_C_cs_1	1217	0.201069257251302	-5.69351184975441	1	X59.KEGG_PROPANOATE_METABOLISM	PLIER	integrated	CL_0000775_naive	chr1	1.65144956757756e-08	0.831705982628507	1	5.68181818181818e-10	5	81	874	FALSE	FALSE	0.341249753199135	0.341249753199135	34246511	rs12121008
chr1_34258327_T_C	X59.KEGG_PROPANOATE_METABOLISM_PLIER_integrated	chr1_34258327_T_C	chr1_34258327_T_C	X59.KEGG_PROPANOATE_METABOLISM_PLIER_integrated_CL_0000775_naive_chr1_34258327_T_C_cs_1	1272	0.67423451497916	-5.90251796988819	1	X59.KEGG_PROPANOATE_METABOLISM	PLIER	integrated	CL_0000775_naive	chr1	1.65144956757756e-08	0.831705982628507	1	5.68181818181818e-10	5	81	874	FALSE	FALSE	0.341249753199135	0.341249753199135	34258327	rs12128858
chr1_36586360_A_G	Cluster_16995_funcExplorer_integrated	chr1_36583114_A_T	chr1_36586360_A_G	Cluster_16995_funcExplorer_integrated_CL_0000233_naive_chr1_36586360_A_G_cs_1	962	0.0170932243782278	-5.05551144812375	1	Cluster_16995	funcExplorer	integrated	CL_0000233_naive	chr1	1.67345528419931e-08	0.793606071180257	1	4e-10	12	1920	30	FALSE	FALSE	2.32690391176817e-05	2.32690391176817e-05	36583114	rs6696336
chr1_36586360_A_G	Cluster_16995_funcExplorer_integrated	chr1_36583840_C_G	chr1_36586360_A_G	Cluster_16995_funcExplorer_integrated_CL_0000233_naive_chr1_36586360_A_G_cs_1	964	0.116020377248825	-5.44923792633679	1	Cluster_16995	funcExplorer	integrated	CL_0000233_naive	chr1	1.67345528419931e-08	0.793606071180257	1	4e-10	12	1920	30	FALSE	FALSE	2.32690391176817e-05	2.32690391176817e-05	36583840	rs1997965
chr1_36586360_A_G	Cluster_16995_funcExplorer_integrated	chr1_36585548_G_A	chr1_36586360_A_G	Cluster_16995_funcExplorer_integrated_CL_0000233_naive_chr1_36586360_A_G_cs_1	972	0.256616075888968	-5.68051219343329	1	Cluster_16995	funcExplorer	integrated	CL_0000233_naive	chr1	1.67345528419931e-08	0.793606071180257	1	4e-10	12	1920	30	FALSE	FALSE	2.32690391176817e-05	2.32690391176817e-05	36585548	rs1076774
chr1_36586360_A_G	Cluster_16995_funcExplorer_integrated	chr1_36585786_G_A	chr1_36586360_A_G	Cluster_16995_funcExplorer_integrated_CL_0000233_naive_chr1_36586360_A_G_cs_1	973	0.142341804692802	-5.54701079846781	1	Cluster_16995	funcExplorer	integrated	CL_0000233_naive	chr1	1.67345528419931e-08	0.793606071180257	1	4e-10	12	1920	30	FALSE	FALSE	2.32690391176817e-05	2.32690391176817e-05	36585786	rs743013
chr1_36586360_A_G	Cluster_16995_funcExplorer_integrated	chr1_36586360_A_G	chr1_36586360_A_G	Cluster_16995_funcExplorer_integrated_CL_0000233_naive_chr1_36586360_A_G_cs_1	976	0.43100053803393	-5.79112107624799	1	Cluster_16995	funcExplorer	integrated	CL_0000233_naive	chr1	1.67345528419931e-08	0.793606071180257	1	4e-10	12	1920	30	FALSE	FALSE	2.32690391176817e-05	2.32690391176817e-05	36586360	rs11589597
chr1_36592753_T_C	Cluster_15755_funcExplorer_integrated	chr1_36588481_C_T	chr1_36592753_T_C	Cluster_15755_funcExplorer_integrated_CL_0000233_naive_chr1_36592753_T_C_cs_1	974	0.113047603023761	-5.90566412601534	1	Cluster_15755	funcExplorer	integrated	CL_0000233_naive	chr1	1.29927725870792e-08	0.7157654731383	1	4e-10	39	2095	96	FALSE	FALSE	1.96812210038116e-13	1.18087326022869e-12	36588481	rs4653202
chr1_36592753_T_C	IC165_ICA_integrated	chr1_36588481_C_T	chr1_36588481_C_T	IC165_ICA_integrated_CL_0000233_naive_chr1_36588481_C_T_cs_1	977	0.331761167092987	-5.85254763076483	1	IC165	ICA	integrated	CL_0000233_naive	chr1	1.37430033214249e-08	0.779177621445833	1	2.94117647058824e-10	130	2095	1010	FALSE	FALSE	0.0729779710401445	0.437867826240867	36588481	rs4653202
chr1_36592753_T_C	IC1_ICA_integrated	chr1_36588481_C_T	chr1_36592753_T_C	IC1_ICA_integrated_CL_0000233_naive_chr1_36592753_T_C_cs_1	974	0.0906850470970261	-5.69000841739824	1	IC1	ICA	integrated	CL_0000233_naive	chr1	6.0009695533212e-09	0.779177621445833	1	2.94117647058824e-10	119	2095	1022	FALSE	FALSE	0.414271008996296	1	36588481	rs4653202
chr1_36592753_T_C	IC54_ICA_integrated	chr1_36588481_C_T	chr1_36592753_T_C	IC54_ICA_integrated_CL_0000233_naive_chr1_36592753_T_C_cs_1	974	0.0825329415728332	5.88045775424343	1	IC54	ICA	integrated	CL_0000233_naive	chr1	6.0009695533212e-09	0.779177621445833	1	2.94117647058824e-10	136	2095	1010	FALSE	FALSE	0.0205745239598096	0.123447143758858	36588481	rs4653202
chr1_36592753_T_C	F9_PEER_integrated	chr1_36588481_C_T	chr1_36592753_T_C	F9_PEER_integrated_CL_0000233_naive_chr1_36592753_T_C_cs_1	974	0.181032651627201	5.6463707724566	1	F9	PEER	integrated	CL_0000233_naive	chr1	4.59026592416274e-08	0.634464415554796	1	1.02040816326531e-09	178	2095	857	FALSE	FALSE	3.8651602040937e-16	2.31909612245622e-15	36588481	rs4653202
chr1_36592753_T_C	X1.NIELSEN_SCHWANNOMA_DN_PLIER_integrated	chr1_36588481_C_T	chr1_36592753_T_C	X1.NIELSEN_SCHWANNOMA_DN_PLIER_integrated_CL_0000233_naive_chr1_36592753_T_C_cs_1	974	0.0905748508725785	-5.40329712356626	1	X1.NIELSEN_SCHWANNOMA_DN	PLIER	integrated	CL_0000233_naive	chr1	4.68717801505997e-08	0.405414441999968	1	5.68181818181818e-10	148	2095	890	FALSE	FALSE	1.11204645516726e-06	6.67227873100358e-06	36588481	rs4653202
chr1_36592753_T_C	X1.NIELSEN_SCHWANNOMA_DN_PLIER_integrated	chr1_36592753_T_C	chr1_36592753_T_C	X1.NIELSEN_SCHWANNOMA_DN_PLIER_integrated_CL_0000233_naive_chr1_36592753_T_C_cs_1	981	0.280516303535477	-5.68600979403616	1	X1.NIELSEN_SCHWANNOMA_DN	PLIER	integrated	CL_0000233_naive	chr1	4.68717801505997e-08	0.405414441999968	1	5.68181818181818e-10	148	2095	890	FALSE	FALSE	1.11204645516726e-06	6.67227873100358e-06	36592753	rs4653204
chr1_36592753_T_C	IC165_ICA_integrated	chr1_36592753_T_C	chr1_36588481_C_T	IC165_ICA_integrated_CL_0000233_naive_chr1_36588481_C_T_cs_1	984	0.202027113146544	-5.74118278009694	1	IC165	ICA	integrated	CL_0000233_naive	chr1	1.37430033214249e-08	0.779177621445833	1	2.94117647058824e-10	130	2095	1010	FALSE	FALSE	0.0729779710401445	0.437867826240867	36592753	rs4653204
chr1_36592753_T_C	IC54_ICA_integrated	chr1_36592753_T_C	chr1_36592753_T_C	IC54_ICA_integrated_CL_0000233_naive_chr1_36592753_T_C_cs_1	981	0.276060520877736	6.13721847134427	1	IC54	ICA	integrated	CL_0000233_naive	chr1	6.0009695533212e-09	0.779177621445833	1	2.94117647058824e-10	136	2095	1010	FALSE	FALSE	0.0205745239598096	0.123447143758858	36592753	rs4653204
chr1_36592753_T_C	F9_PEER_integrated	chr1_36592753_T_C	chr1_36592753_T_C	F9_PEER_integrated_CL_0000233_naive_chr1_36592753_T_C_cs_1	981	0.24372555110788	5.73117804176984	1	F9	PEER	integrated	CL_0000233_naive	chr1	4.59026592416274e-08	0.634464415554796	1	1.02040816326531e-09	178	2095	857	FALSE	FALSE	3.8651602040937e-16	2.31909612245622e-15	36592753	rs4653204
chr1_36592753_T_C	Cluster_15755_funcExplorer_integrated	chr1_36592753_T_C	chr1_36592753_T_C	Cluster_15755_funcExplorer_integrated_CL_0000233_naive_chr1_36592753_T_C_cs_1	981	0.261083091242656	-6.09722815703981	1	Cluster_15755	funcExplorer	integrated	CL_0000233_naive	chr1	1.29927725870792e-08	0.7157654731383	1	4e-10	39	2095	96	FALSE	FALSE	1.96812210038116e-13	1.18087326022869e-12	36592753	rs4653204
chr1_36592753_T_C	IC1_ICA_integrated	chr1_36592753_T_C	chr1_36592753_T_C	IC1_ICA_integrated_CL_0000233_naive_chr1_36592753_T_C_cs_1	981	0.275601888945877	-5.94545772263412	1	IC1	ICA	integrated	CL_0000233_naive	chr1	6.0009695533212e-09	0.779177621445833	1	2.94117647058824e-10	119	2095	1022	FALSE	FALSE	0.414271008996296	1	36592753	rs4653204
chr1_36592753_T_C	IC1_ICA_integrated	chr1_36594959_A_G	chr1_36592753_T_C	IC1_ICA_integrated_CL_0000233_naive_chr1_36592753_T_C_cs_1	984	0.275601888945877	-5.94545772263412	1	IC1	ICA	integrated	CL_0000233_naive	chr1	6.0009695533212e-09	0.779177621445833	1	2.94117647058824e-10	119	2095	1022	FALSE	FALSE	0.414271008996296	1	36594959
chr1_36592753_T_C	Cluster_15755_funcExplorer_integrated	chr1_36594959_A_G	chr1_36592753_T_C	Cluster_15755_funcExplorer_integrated_CL_0000233_naive_chr1_36592753_T_C_cs_1	984	0.261083091242656	-6.09722815703981	1	Cluster_15755	funcExplorer	integrated	CL_0000233_naive	chr1	1.29927725870792e-08	0.7157654731383	1	4e-10	39	2095	96	FALSE	FALSE	1.96812210038116e-13	1.18087326022869e-12	36594959
chr1_36592753_T_C	X1.NIELSEN_SCHWANNOMA_DN_PLIER_integrated	chr1_36594959_A_G	chr1_36592753_T_C	X1.NIELSEN_SCHWANNOMA_DN_PLIER_integrated_CL_0000233_naive_chr1_36592753_T_C_cs_1	984	0.280516303535477	-5.68600979403616	1	X1.NIELSEN_SCHWANNOMA_DN	PLIER	integrated	CL_0000233_naive	chr1	4.68717801505997e-08	0.405414441999968	1	5.68181818181818e-10	148	2095	890	FALSE	FALSE	1.11204645516726e-06	6.67227873100358e-06	36594959
chr1_36592753_T_C	IC54_ICA_integrated	chr1_36594959_A_G	chr1_36592753_T_C	IC54_ICA_integrated_CL_0000233_naive_chr1_36592753_T_C_cs_1	984	0.276060520877736	6.13721847134427	1	IC54	ICA	integrated	CL_0000233_naive	chr1	6.0009695533212e-09	0.779177621445833	1	2.94117647058824e-10	136	2095	1010	FALSE	FALSE	0.0205745239598096	0.123447143758858	36594959
chr1_36592753_T_C	IC165_ICA_integrated	chr1_36594959_A_G	chr1_36588481_C_T	IC165_ICA_integrated_CL_0000233_naive_chr1_36588481_C_T_cs_1	987	0.202027113146544	-5.74118278009694	1	IC165	ICA	integrated	CL_0000233_naive	chr1	1.37430033214249e-08	0.779177621445833	1	2.94117647058824e-10	130	2095	1010	FALSE	FALSE	0.0729779710401445	0.437867826240867	36594959
chr1_36592753_T_C	F9_PEER_integrated	chr1_36594959_A_G	chr1_36592753_T_C	F9_PEER_integrated_CL_0000233_naive_chr1_36592753_T_C_cs_1	984	0.24372555110788	5.73117804176984	1	F9	PEER	integrated	CL_0000233_naive	chr1	4.59026592416274e-08	0.634464415554796	1	1.02040816326531e-09	178	2095	857	FALSE	FALSE	3.8651602040937e-16	2.31909612245622e-15	36594959
chr1_36592753_T_C	IC54_ICA_integrated	chr1_36595541_A_G	chr1_36592753_T_C	IC54_ICA_integrated_CL_0000233_naive_chr1_36592753_T_C_cs_1	985	0.276060520877736	6.13721847134427	1	IC54	ICA	integrated	CL_0000233_naive	chr1	6.0009695533212e-09	0.779177621445833	1	2.94117647058824e-10	136	2095	1010	FALSE	FALSE	0.0205745239598096	0.123447143758858	36595541	rs1076775
chr1_36592753_T_C	Cluster_15755_funcExplorer_integrated	chr1_36595541_A_G	chr1_36592753_T_C	Cluster_15755_funcExplorer_integrated_CL_0000233_naive_chr1_36592753_T_C_cs_1	985	0.261083091242656	-6.09722815703981	1	Cluster_15755	funcExplorer	integrated	CL_0000233_naive	chr1	1.29927725870792e-08	0.7157654731383	1	4e-10	39	2095	96	FALSE	FALSE	1.96812210038116e-13	1.18087326022869e-12	36595541	rs1076775
chr1_36592753_T_C	X1.NIELSEN_SCHWANNOMA_DN_PLIER_integrated	chr1_36595541_A_G	chr1_36592753_T_C	X1.NIELSEN_SCHWANNOMA_DN_PLIER_integrated_CL_0000233_naive_chr1_36592753_T_C_cs_1	985	0.280516303535477	-5.68600979403616	1	X1.NIELSEN_SCHWANNOMA_DN	PLIER	integrated	CL_0000233_naive	chr1	4.68717801505997e-08	0.405414441999968	1	5.68181818181818e-10	148	2095	890	FALSE	FALSE	1.11204645516726e-06	6.67227873100358e-06	36595541	rs1076775
chr1_36592753_T_C	IC1_ICA_integrated	chr1_36595541_A_G	chr1_36592753_T_C	IC1_ICA_integrated_CL_0000233_naive_chr1_36592753_T_C_cs_1	985	0.275601888945877	-5.94545772263412	1	IC1	ICA	integrated	CL_0000233_naive	chr1	6.0009695533212e-09	0.779177621445833	1	2.94117647058824e-10	119	2095	1022	FALSE	FALSE	0.414271008996296	1	36595541	rs1076775
chr1_36592753_T_C	IC165_ICA_integrated	chr1_36595541_A_G	chr1_36588481_C_T	IC165_ICA_integrated_CL_0000233_naive_chr1_36588481_C_T_cs_1	988	0.202027113146544	-5.74118278009694	1	IC165	ICA	integrated	CL_0000233_naive	chr1	1.37430033214249e-08	0.779177621445833	1	2.94117647058824e-10	130	2095	1010	FALSE	FALSE	0.0729779710401445	0.437867826240867	36595541	rs1076775
chr1_36592753_T_C	F9_PEER_integrated	chr1_36595541_A_G	chr1_36592753_T_C	F9_PEER_integrated_CL_0000233_naive_chr1_36592753_T_C_cs_1	985	0.24372555110788	5.73117804176984	1	F9	PEER	integrated	CL_0000233_naive	chr1	4.59026592416274e-08	0.634464415554796	1	1.02040816326531e-09	178	2095	857	FALSE	FALSE	3.8651602040937e-16	2.31909612245622e-15	36595541	rs1076775
chr1_36592753_T_C	Cluster_15755_funcExplorer_integrated	chr1_36596172_G_A	chr1_36592753_T_C	Cluster_15755_funcExplorer_integrated_CL_0000233_naive_chr1_36592753_T_C_cs_1	988	0.0745797112367288	-5.79155766049153	1	Cluster_15755	funcExplorer	integrated	CL_0000233_naive	chr1	1.29927725870792e-08	0.7157654731383	1	4e-10	39	2095	96	FALSE	FALSE	1.96812210038116e-13	1.18087326022869e-12	36596172	rs910524
chr1_36592753_T_C	IC165_ICA_integrated	chr1_36596172_G_A	chr1_36588481_C_T	IC165_ICA_integrated_CL_0000233_naive_chr1_36588481_C_T_cs_1	991	0.0653864872157143	-5.46750827222131	1	IC165	ICA	integrated	CL_0000233_naive	chr1	1.37430033214249e-08	0.779177621445833	1	2.94117647058824e-10	130	2095	1010	FALSE	FALSE	0.0729779710401445	0.437867826240867	36596172	rs910524
chr1_36592753_T_C	F9_PEER_integrated	chr1_36596172_G_A	chr1_36592753_T_C	F9_PEER_integrated_CL_0000233_naive_chr1_36592753_T_C_cs_1	988	0.0725856211899932	5.44777884033559	1	F9	PEER	integrated	CL_0000233_naive	chr1	4.59026592416274e-08	0.634464415554796	1	1.02040816326531e-09	178	2095	857	FALSE	FALSE	3.8651602040937e-16	2.31909612245622e-15	36596172	rs910524
chr1_36592753_T_C	X1.NIELSEN_SCHWANNOMA_DN_PLIER_integrated	chr1_36596172_G_A	chr1_36592753_T_C	X1.NIELSEN_SCHWANNOMA_DN_PLIER_integrated_CL_0000233_naive_chr1_36592753_T_C_cs_1	988	0.0705923748110712	-5.3516960344607	1	X1.NIELSEN_SCHWANNOMA_DN	PLIER	integrated	CL_0000233_naive	chr1	4.68717801505997e-08	0.405414441999968	1	5.68181818181818e-10	148	2095	890	FALSE	FALSE	1.11204645516726e-06	6.67227873100358e-06	36596172	rs910524
chr1_36592753_T_C	IC1_ICA_integrated	chr1_36596172_G_A	chr1_36592753_T_C	IC1_ICA_integrated_CL_0000233_naive_chr1_36592753_T_C_cs_1	988	0.0790617270041105	-5.66581006422589	1	IC1	ICA	integrated	CL_0000233_naive	chr1	6.0009695533212e-09	0.779177621445833	1	2.94117647058824e-10	119	2095	1022	FALSE	FALSE	0.414271008996296	1	36596172	rs910524
chr1_36592753_T_C	IC54_ICA_integrated	chr1_36596172_G_A	chr1_36592753_T_C	IC54_ICA_integrated_CL_0000233_naive_chr1_36592753_T_C_cs_1	988	0.0966938666598148	5.88691162206682	1	IC54	ICA	integrated	CL_0000233_naive	chr1	6.0009695533212e-09	0.779177621445833	1	2.94117647058824e-10	136	2095	1010	FALSE	FALSE	0.0205745239598096	0.123447143758858	36596172	rs910524
chr1_37990219_G_C	Cluster_15146_funcExplorer_integrated	chr1_37931669_G_A	chr1_37995647_C_A	Cluster_15146_funcExplorer_integrated_CL_0002057_LPS_24h_chr1_37995647_C_A_cs_1	1058	0.0401675040010875	5.51198652663558	1	Cluster_15146	funcExplorer	integrated	CL_0002057_LPS_24h	chr1	1.11795902297178e-08	0.0027161400362304	0.0574379453351261	4e-10	5	1506	6	FALSE	FALSE	2.05083669524856e-05	8.20334678099425e-05	37931669
chr1_37990219_G_C	Cluster_3573_funcExplorer_integrated	chr1_37931669_G_A	chr1_37990219_G_C	Cluster_3573_funcExplorer_integrated_CL_0002057_LPS_24h_chr1_37990219_G_C_cs_1	1075	0.00480895759760325	-4.48838127163936	1	Cluster_3573	funcExplorer	integrated	CL_0002057_LPS_24h	chr1	1.21934427352093e-08	0.00294660092417104	0.0623114789920247	4e-10	9	1506	15	FALSE	FALSE	5.15804048528119e-07	2.06321619411248e-06	37931669
chr1_37990219_G_C	Cluster_3573_funcExplorer_integrated	chr1_37931697_C_T	chr1_37990219_G_C	Cluster_3573_funcExplorer_integrated_CL_0002057_LPS_24h_chr1_37990219_G_C_cs_1	1076	0.00480895759760325	-4.48838127163936	1	Cluster_3573	funcExplorer	integrated	CL_0002057_LPS_24h	chr1	1.21934427352093e-08	0.00294660092417104	0.0623114789920247	4e-10	9	1506	15	FALSE	FALSE	5.15804048528119e-07	2.06321619411248e-06	37931697
chr1_37990219_G_C	Cluster_15146_funcExplorer_integrated	chr1_37931697_C_T	chr1_37995647_C_A	Cluster_15146_funcExplorer_integrated_CL_0002057_LPS_24h_chr1_37995647_C_A_cs_1	1059	0.0401675040010875	5.51198652663558	1	Cluster_15146	funcExplorer	integrated	CL_0002057_LPS_24h	chr1	1.11795902297178e-08	0.0027161400362304	0.0574379453351261	4e-10	5	1506	6	FALSE	FALSE	2.05083669524856e-05	8.20334678099425e-05	37931697
chr1_37990219_G_C	Cluster_15146_funcExplorer_integrated	chr1_37932916_T_C	chr1_37995647_C_A	Cluster_15146_funcExplorer_integrated_CL_0002057_LPS_24h_chr1_37995647_C_A_cs_1	1064	0.0401675040010872	5.51198652663558	1	Cluster_15146	funcExplorer	integrated	CL_0002057_LPS_24h	chr1	1.11795902297178e-08	0.0027161400362304	0.0574379453351261	4e-10	5	1506	6	FALSE	FALSE	2.05083669524856e-05	8.20334678099425e-05	37932916	rs17465420
chr1_37990219_G_C	Cluster_3573_funcExplorer_integrated	chr1_37932916_T_C	chr1_37990219_G_C	Cluster_3573_funcExplorer_integrated_CL_0002057_LPS_24h_chr1_37990219_G_C_cs_1	1081	0.00480895759760325	-4.48838127163936	1	Cluster_3573	funcExplorer	integrated	CL_0002057_LPS_24h	chr1	1.21934427352093e-08	0.00294660092417104	0.0623114789920247	4e-10	9	1506	15	FALSE	FALSE	5.15804048528119e-07	2.06321619411248e-06	37932916	rs17465420
chr1_37990219_G_C	F3_PEER_separate_CL_0002057_LPS_24h	chr1_37934144_G_A	chr1_37990219_G_C	F3_PEER_separate_CL_0002057_LPS_24h_chr1_37990219_G_C_cs_1	1084	0.015296292125397	5.17917707574813	1	F3	PEER	separate	CL_0002057_LPS_24h	chr1	2.36456122177859e-08	0.535595193703594	1	9.43396226415094e-10	689	1506	1276	FALSE	FALSE	0	0	37934144	rs28605759
chr1_37990219_G_C	Cluster_3573_funcExplorer_integrated	chr1_37934144_G_A	chr1_37990219_G_C	Cluster_3573_funcExplorer_integrated_CL_0002057_LPS_24h_chr1_37990219_G_C_cs_1	1084	0.00486448745485157	-4.43671469644828	1	Cluster_3573	funcExplorer	integrated	CL_0002057_LPS_24h	chr1	1.21934427352093e-08	0.00294660092417104	0.0623114789920247	4e-10	9	1506	15	FALSE	FALSE	5.15804048528119e-07	2.06321619411248e-06	37934144	rs28605759
chr1_37990219_G_C	Cluster_15146_funcExplorer_integrated	chr1_37934886_C_T	chr1_37995647_C_A	Cluster_15146_funcExplorer_integrated_CL_0002057_LPS_24h_chr1_37995647_C_A_cs_1	1068	0.0401675040010875	5.51198652663558	1	Cluster_15146	funcExplorer	integrated	CL_0002057_LPS_24h	chr1	1.11795902297178e-08	0.0027161400362304	0.0574379453351261	4e-10	5	1506	6	FALSE	FALSE	2.05083669524856e-05	8.20334678099425e-05	37934886
chr1_37990219_G_C	Cluster_3573_funcExplorer_integrated	chr1_37934886_C_T	chr1_37990219_G_C	Cluster_3573_funcExplorer_integrated_CL_0002057_LPS_24h_chr1_37990219_G_C_cs_1	1085	0.00480895759760325	-4.48838127163936	1	Cluster_3573	funcExplorer	integrated	CL_0002057_LPS_24h	chr1	1.21934427352093e-08	0.00294660092417104	0.0623114789920247	4e-10	9	1506	15	FALSE	FALSE	5.15804048528119e-07	2.06321619411248e-06	37934886
chr1_37990219_G_C	Cluster_3573_funcExplorer_integrated	chr1_37936787_G_A	chr1_37990219_G_C	Cluster_3573_funcExplorer_integrated_CL_0002057_LPS_24h_chr1_37990219_G_C_cs_1	1088	0.00480895759760325	-4.48838127163936	1	Cluster_3573	funcExplorer	integrated	CL_0002057_LPS_24h	chr1	1.21934427352093e-08	0.00294660092417104	0.0623114789920247	4e-10	9	1506	15	FALSE	FALSE	5.15804048528119e-07	2.06321619411248e-06	37936787
chr1_37990219_G_C	Cluster_15146_funcExplorer_integrated	chr1_37936787_G_A	chr1_37995647_C_A	Cluster_15146_funcExplorer_integrated_CL_0002057_LPS_24h_chr1_37995647_C_A_cs_1	1071	0.0401675040010875	5.51198652663558	1	Cluster_15146	funcExplorer	integrated	CL_0002057_LPS_24h	chr1	1.11795902297178e-08	0.0027161400362304	0.0574379453351261	4e-10	5	1506	6	FALSE	FALSE	2.05083669524856e-05	8.20334678099425e-05	37936787
chr1_37990219_G_C	Cluster_15146_funcExplorer_integrated	chr1_37938295_A_AAATAAATC	chr1_37995647_C_A	Cluster_15146_funcExplorer_integrated_CL_0002057_LPS_24h_chr1_37995647_C_A_cs_1	1073	0.0100733455010675	5.15316432461932	1	Cluster_15146	funcExplorer	integrated	CL_0002057_LPS_24h	chr1	1.11795902297178e-08	0.0027161400362304	0.0574379453351261	4e-10	5	1506	6	FALSE	FALSE	2.05083669524856e-05	8.20334678099425e-05	37938295
chr1_37990219_G_C	Cluster_3573_funcExplorer_integrated	chr1_37938295_A_AAATAAATC	chr1_37990219_G_C	Cluster_3573_funcExplorer_integrated_CL_0002057_LPS_24h_chr1_37990219_G_C_cs_1	1090	0.00519444528695934	-4.47061388097558	1	Cluster_3573	funcExplorer	integrated	CL_0002057_LPS_24h	chr1	1.21934427352093e-08	0.00294660092417104	0.0623114789920247	4e-10	9	1506	15	FALSE	FALSE	5.15804048528119e-07	2.06321619411248e-06	37938295
chr1_37990219_G_C	F3_PEER_separate_CL_0002057_LPS_24h	chr1_37938295_A_AAATAAATC	chr1_37990219_G_C	F3_PEER_separate_CL_0002057_LPS_24h_chr1_37990219_G_C_cs_1	1090	0.0195177652299624	5.26065240966465	1	F3	PEER	separate	CL_0002057_LPS_24h	chr1	2.36456122177859e-08	0.535595193703594	1	9.43396226415094e-10	689	1506	1276	FALSE	FALSE	0	0	37938295
chr1_37990219_G_C	Cluster_15146_funcExplorer_integrated	chr1_37939585_T_C	chr1_37995647_C_A	Cluster_15146_funcExplorer_integrated_CL_0002057_LPS_24h_chr1_37995647_C_A_cs_1	1076	0.0281342727175058	5.43148388270765	1	Cluster_15146	funcExplorer	integrated	CL_0002057_LPS_24h	chr1	1.11795902297178e-08	0.0027161400362304	0.0574379453351261	4e-10	5	1506	6	FALSE	FALSE	2.05083669524856e-05	8.20334678099425e-05	37939585	rs28730330
chr1_37990219_G_C	Cluster_15146_funcExplorer_integrated	chr1_37939686_A_G	chr1_37995647_C_A	Cluster_15146_funcExplorer_integrated_CL_0002057_LPS_24h_chr1_37995647_C_A_cs_1	1078	0.0281342727175058	5.43148388270765	1	Cluster_15146	funcExplorer	integrated	CL_0002057_LPS_24h	chr1	1.11795902297178e-08	0.0027161400362304	0.0574379453351261	4e-10	5	1506	6	FALSE	FALSE	2.05083669524856e-05	8.20334678099425e-05	37939686
chr1_37990219_G_C	Cluster_15146_funcExplorer_integrated	chr1_37941342_C_T	chr1_37995647_C_A	Cluster_15146_funcExplorer_integrated_CL_0002057_LPS_24h_chr1_37995647_C_A_cs_1	1079	0.0281342727175058	5.43148388270765	1	Cluster_15146	funcExplorer	integrated	CL_0002057_LPS_24h	chr1	1.11795902297178e-08	0.0027161400362304	0.0574379453351261	4e-10	5	1506	6	FALSE	FALSE	2.05083669524856e-05	8.20334678099425e-05	37941342	rs28435150
chr1_37990219_G_C	Cluster_15146_funcExplorer_integrated	chr1_37941474_A_G	chr1_37995647_C_A	Cluster_15146_funcExplorer_integrated_CL_0002057_LPS_24h_chr1_37995647_C_A_cs_1	1080	0.0281342727175058	5.43148388270765	1	Cluster_15146	funcExplorer	integrated	CL_0002057_LPS_24h	chr1	1.11795902297178e-08	0.0027161400362304	0.0574379453351261	4e-10	5	1506	6	FALSE	FALSE	2.05083669524856e-05	8.20334678099425e-05	37941474	rs28570969
chr1_37990219_G_C	Cluster_15146_funcExplorer_integrated	chr1_37942291_G_A	chr1_37995647_C_A	Cluster_15146_funcExplorer_integrated_CL_0002057_LPS_24h_chr1_37995647_C_A_cs_1	1083	0.0281342727175058	5.43148388270765	1	Cluster_15146	funcExplorer	integrated	CL_0002057_LPS_24h	chr1	1.11795902297178e-08	0.0027161400362304	0.0574379453351261	4e-10	5	1506	6	FALSE	FALSE	2.05083669524856e-05	8.20334678099425e-05	37942291	rs2127645
chr1_37990219_G_C	Cluster_3573_funcExplorer_integrated	chr1_37942492_G_A	chr1_37990219_G_C	Cluster_3573_funcExplorer_integrated_CL_0002057_LPS_24h_chr1_37990219_G_C_cs_1	1101	0.00477316502157388	-4.50113516420172	1	Cluster_3573	funcExplorer	integrated	CL_0002057_LPS_24h	chr1	1.21934427352093e-08	0.00294660092417104	0.0623114789920247	4e-10	9	1506	15	FALSE	FALSE	5.15804048528119e-07	2.06321619411248e-06	37942492	rs2170169
chr1_37990219_G_C	Cluster_15146_funcExplorer_integrated	chr1_37942492_G_A	chr1_37995647_C_A	Cluster_15146_funcExplorer_integrated_CL_0002057_LPS_24h_chr1_37995647_C_A_cs_1	1084	0.0265582152743826	5.40381830502069	1	Cluster_15146	funcExplorer	integrated	CL_0002057_LPS_24h	chr1	1.11795902297178e-08	0.0027161400362304	0.0574379453351261	4e-10	5	1506	6	FALSE	FALSE	2.05083669524856e-05	8.20334678099425e-05	37942492	rs2170169
chr1_37990219_G_C	Cluster_15146_funcExplorer_integrated	chr1_37943174_A_G	chr1_37995647_C_A	Cluster_15146_funcExplorer_integrated_CL_0002057_LPS_24h_chr1_37995647_C_A_cs_1	1085	0.0281342727175058	5.43148388270765	1	Cluster_15146	funcExplorer	integrated	CL_0002057_LPS_24h	chr1	1.11795902297178e-08	0.0027161400362304	0.0574379453351261	4e-10	5	1506	6	FALSE	FALSE	2.05083669524856e-05	8.20334678099425e-05	37943174	rs28760325
chr1_37990219_G_C	Cluster_15146_funcExplorer_integrated	chr1_37943196_C_G	chr1_37995647_C_A	Cluster_15146_funcExplorer_integrated_CL_0002057_LPS_24h_chr1_37995647_C_A_cs_1	1086	0.0281342727175058	5.43148388270765	1	Cluster_15146	funcExplorer	integrated	CL_0002057_LPS_24h	chr1	1.11795902297178e-08	0.0027161400362304	0.0574379453351261	4e-10	5	1506	6	FALSE	FALSE	2.05083669524856e-05	8.20334678099425e-05	37943196	rs28645205
chr1_37990219_G_C	Cluster_15146_funcExplorer_integrated	chr1_37943302_T_C	chr1_37995647_C_A	Cluster_15146_funcExplorer_integrated_CL_0002057_LPS_24h_chr1_37995647_C_A_cs_1	1088	0.00787430319954308	5.06319773986087	1	Cluster_15146	funcExplorer	integrated	CL_0002057_LPS_24h	chr1	1.11795902297178e-08	0.0027161400362304	0.0574379453351261	4e-10	5	1506	6	FALSE	FALSE	2.05083669524856e-05	8.20334678099425e-05	37943302	rs28391281
chr1_37990219_G_C	F3_PEER_separate_CL_0002057_LPS_24h	chr1_37943302_T_C	chr1_37990219_G_C	F3_PEER_separate_CL_0002057_LPS_24h_chr1_37990219_G_C_cs_1	1105	0.0139810238780007	5.17072493680682	1	F3	PEER	separate	CL_0002057_LPS_24h	chr1	2.36456122177859e-08	0.535595193703594	1	9.43396226415094e-10	689	1506	1276	FALSE	FALSE	0	0	37943302	rs28391281
chr1_37990219_G_C	Cluster_3573_funcExplorer_integrated	chr1_37943401_A_G	chr1_37990219_G_C	Cluster_3573_funcExplorer_integrated_CL_0002057_LPS_24h_chr1_37990219_G_C_cs_1	1106	0.00543655395881637	-4.49252261846314	1	Cluster_3573	funcExplorer	integrated	CL_0002057_LPS_24h	chr1	1.21934427352093e-08	0.00294660092417104	0.0623114789920247	4e-10	9	1506	15	FALSE	FALSE	5.15804048528119e-07	2.06321619411248e-06	37943401	rs28673728
chr1_37990219_G_C	F3_PEER_separate_CL_0002057_LPS_24h	chr1_37943401_A_G	chr1_37990219_G_C	F3_PEER_separate_CL_0002057_LPS_24h_chr1_37990219_G_C_cs_1	1106	0.0114235372715449	5.10888009600516	1	F3	PEER	separate	CL_0002057_LPS_24h	chr1	2.36456122177859e-08	0.535595193703594	1	9.43396226415094e-10	689	1506	1276	FALSE	FALSE	0	0	37943401	rs28673728
chr1_37990219_G_C	Cluster_3573_funcExplorer_integrated	chr1_37943431_G_C	chr1_37990219_G_C	Cluster_3573_funcExplorer_integrated_CL_0002057_LPS_24h_chr1_37990219_G_C_cs_1	1107	0.00542569158999229	-4.49425219222819	1	Cluster_3573	funcExplorer	integrated	CL_0002057_LPS_24h	chr1	1.21934427352093e-08	0.00294660092417104	0.0623114789920247	4e-10	9	1506	15	FALSE	FALSE	5.15804048528119e-07	2.06321619411248e-06	37943431	rs28380108
chr1_37990219_G_C	F3_PEER_separate_CL_0002057_LPS_24h	chr1_37943431_G_C	chr1_37990219_G_C	F3_PEER_separate_CL_0002057_LPS_24h_chr1_37990219_G_C_cs_1	1107	0.0192993377707208	5.2616220906023	1	F3	PEER	separate	CL_0002057_LPS_24h	chr1	2.36456122177859e-08	0.535595193703594	1	9.43396226415094e-10	689	1506	1276	FALSE	FALSE	0	0	37943431	rs28380108
chr1_37990219_G_C	Cluster_15146_funcExplorer_integrated	chr1_37943431_G_C	chr1_37995647_C_A	Cluster_15146_funcExplorer_integrated_CL_0002057_LPS_24h_chr1_37995647_C_A_cs_1	1090	0.00808299474611607	5.05626803170726	1	Cluster_15146	funcExplorer	integrated	CL_0002057_LPS_24h	chr1	1.11795902297178e-08	0.0027161400362304	0.0574379453351261	4e-10	5	1506	6	FALSE	FALSE	2.05083669524856e-05	8.20334678099425e-05	37943431	rs28380108
chr1_37990219_G_C	Cluster_14369_funcExplorer_separate_CL_0002057_LPS_24h	chr1_37943431_G_C	chr1_37992347_TC_T	Cluster_14369_funcExplorer_separate_CL_0002057_LPS_24h_chr1_37992347_TC_T_cs_1	1099	0.00691533056690852	-5.14326748010172	1	Cluster_14369	funcExplorer	separate	CL_0002057_LPS_24h	chr1	7.56574770544501e-09	0.0569076649330489	1	3.37837837837838e-10	17	1506	18	FALSE	FALSE	5.15790520347694e-18	2.06316208139078e-17	37943431	rs28380108
chr1_37990219_G_C	Cluster_15146_funcExplorer_integrated	chr1_37944649_G_A	chr1_37995647_C_A	Cluster_15146_funcExplorer_integrated_CL_0002057_LPS_24h_chr1_37995647_C_A_cs_1	1093	0.0202776847757808	5.30928569650863	1	Cluster_15146	funcExplorer	integrated	CL_0002057_LPS_24h	chr1	1.11795902297178e-08	0.0027161400362304	0.0574379453351261	4e-10	5	1506	6	FALSE	FALSE	2.05083669524856e-05	8.20334678099425e-05	37944649
chr1_37990219_G_C	Cluster_3573_funcExplorer_integrated	chr1_37944649_G_A	chr1_37990219_G_C	Cluster_3573_funcExplorer_integrated_CL_0002057_LPS_24h_chr1_37990219_G_C_cs_1	1110	0.00541285698329208	-4.55507033544649	1	Cluster_3573	funcExplorer	integrated	CL_0002057_LPS_24h	chr1	1.21934427352093e-08	0.00294660092417104	0.0623114789920247	4e-10	9	1506	15	FALSE	FALSE	5.15804048528119e-07	2.06321619411248e-06	37944649
chr1_37990219_G_C	Cluster_3573_funcExplorer_integrated	chr1_37945678_C_T	chr1_37990219_G_C	Cluster_3573_funcExplorer_integrated_CL_0002057_LPS_24h_chr1_37990219_G_C_cs_1	1114	0.00542569158999229	-4.49425219222819	1	Cluster_3573	funcExplorer	integrated	CL_0002057_LPS_24h	chr1	1.21934427352093e-08	0.00294660092417104	0.0623114789920247	4e-10	9	1506	15	FALSE	FALSE	5.15804048528119e-07	2.06321619411248e-06	37945678	rs11485595
chr1_37990219_G_C	F3_PEER_separate_CL_0002057_LPS_24h	chr1_37945678_C_T	chr1_37990219_G_C	F3_PEER_separate_CL_0002057_LPS_24h_chr1_37990219_G_C_cs_1	1114	0.0192993377707208	5.2616220906023	1	F3	PEER	separate	CL_0002057_LPS_24h	chr1	2.36456122177859e-08	0.535595193703594	1	9.43396226415094e-10	689	1506	1276	FALSE	FALSE	0	0	37945678	rs11485595
chr1_37990219_G_C	Cluster_15146_funcExplorer_integrated	chr1_37945678_C_T	chr1_37995647_C_A	Cluster_15146_funcExplorer_integrated_CL_0002057_LPS_24h_chr1_37995647_C_A_cs_1	1097	0.00808299474611607	5.05626803170726	1	Cluster_15146	funcExplorer	integrated	CL_0002057_LPS_24h	chr1	1.11795902297178e-08	0.0027161400362304	0.0574379453351261	4e-10	5	1506	6	FALSE	FALSE	2.05083669524856e-05	8.20334678099425e-05	37945678	rs11485595
chr1_37990219_G_C	Cluster_14369_funcExplorer_separate_CL_0002057_LPS_24h	chr1_37945678_C_T	chr1_37992347_TC_T	Cluster_14369_funcExplorer_separate_CL_0002057_LPS_24h_chr1_37992347_TC_T_cs_1	1106	0.00691533056690852	-5.14326748010172	1	Cluster_14369	funcExplorer	separate	CL_0002057_LPS_24h	chr1	7.56574770544501e-09	0.0569076649330489	1	3.37837837837838e-10	17	1506	18	FALSE	FALSE	5.15790520347694e-18	2.06316208139078e-17	37945678	rs11485595
chr1_37990219_G_C	Cluster_15146_funcExplorer_integrated	chr1_37949835_A_G	chr1_37995647_C_A	Cluster_15146_funcExplorer_integrated_CL_0002057_LPS_24h_chr1_37995647_C_A_cs_1	1104	0.0202776847757808	5.30928569650863	1	Cluster_15146	funcExplorer	integrated	CL_0002057_LPS_24h	chr1	1.11795902297178e-08	0.0027161400362304	0.0574379453351261	4e-10	5	1506	6	FALSE	FALSE	2.05083669524856e-05	8.20334678099425e-05	37949835	rs17531077
chr1_37990219_G_C	Cluster_3573_funcExplorer_integrated	chr1_37949835_A_G	chr1_37990219_G_C	Cluster_3573_funcExplorer_integrated_CL_0002057_LPS_24h_chr1_37990219_G_C_cs_1	1121	0.00541285698329208	-4.55507033544649	1	Cluster_3573	funcExplorer	integrated	CL_0002057_LPS_24h	chr1	1.21934427352093e-08	0.00294660092417104	0.0623114789920247	4e-10	9	1506	15	FALSE	FALSE	5.15804048528119e-07	2.06321619411248e-06	37949835	rs17531077
chr1_37990219_G_C	F3_PEER_separate_CL_0002057_LPS_24h	chr1_37950638_C_T	chr1_37990219_G_C	F3_PEER_separate_CL_0002057_LPS_24h_chr1_37990219_G_C_cs_1	1124	0.0192993377707208	5.2616220906023	1	F3	PEER	separate	CL_0002057_LPS_24h	chr1	2.36456122177859e-08	0.535595193703594	1	9.43396226415094e-10	689	1506	1276	FALSE	FALSE	0	0	37950638
chr1_37990219_G_C	Cluster_14369_funcExplorer_separate_CL_0002057_LPS_24h	chr1_37950638_C_T	chr1_37992347_TC_T	Cluster_14369_funcExplorer_separate_CL_0002057_LPS_24h_chr1_37992347_TC_T_cs_1	1116	0.00691533056690852	-5.14326748010172	1	Cluster_14369	funcExplorer	separate	CL_0002057_LPS_24h	chr1	7.56574770544501e-09	0.0569076649330489	1	3.37837837837838e-10	17	1506	18	FALSE	FALSE	5.15790520347694e-18	2.06316208139078e-17	37950638
chr1_37990219_G_C	Cluster_15146_funcExplorer_integrated	chr1_37950638_C_T	chr1_37995647_C_A	Cluster_15146_funcExplorer_integrated_CL_0002057_LPS_24h_chr1_37995647_C_A_cs_1	1107	0.00808299474611607	5.05626803170726	1	Cluster_15146	funcExplorer	integrated	CL_0002057_LPS_24h	chr1	1.11795902297178e-08	0.0027161400362304	0.0574379453351261	4e-10	5	1506	6	FALSE	FALSE	2.05083669524856e-05	8.20334678099425e-05	37950638
chr1_37990219_G_C	Cluster_3573_funcExplorer_integrated	chr1_37950638_C_T	chr1_37990219_G_C	Cluster_3573_funcExplorer_integrated_CL_0002057_LPS_24h_chr1_37990219_G_C_cs_1	1124	0.00542569158999229	-4.49425219222819	1	Cluster_3573	funcExplorer	integrated	CL_0002057_LPS_24h	chr1	1.21934427352093e-08	0.00294660092417104	0.0623114789920247	4e-10	9	1506	15	FALSE	FALSE	5.15804048528119e-07	2.06321619411248e-06	37950638
chr1_37990219_G_C	Cluster_15146_funcExplorer_integrated	chr1_37952824_C_T	chr1_37995647_C_A	Cluster_15146_funcExplorer_integrated_CL_0002057_LPS_24h_chr1_37995647_C_A_cs_1	1113	0.00846054439322275	5.07454309768209	1	Cluster_15146	funcExplorer	integrated	CL_0002057_LPS_24h	chr1	1.11795902297178e-08	0.0027161400362304	0.0574379453351261	4e-10	5	1506	6	FALSE	FALSE	2.05083669524856e-05	8.20334678099425e-05	37952824	rs17465651
chr1_37990219_G_C	Cluster_3573_funcExplorer_integrated	chr1_37952824_C_T	chr1_37990219_G_C	Cluster_3573_funcExplorer_integrated_CL_0002057_LPS_24h_chr1_37990219_G_C_cs_1	1130	0.0053280976973592	-4.48721396551748	1	Cluster_3573	funcExplorer	integrated	CL_0002057_LPS_24h	chr1	1.21934427352093e-08	0.00294660092417104	0.0623114789920247	4e-10	9	1506	15	FALSE	FALSE	5.15804048528119e-07	2.06321619411248e-06	37952824	rs17465651
chr1_37990219_G_C	F3_PEER_separate_CL_0002057_LPS_24h	chr1_37952824_C_T	chr1_37990219_G_C	F3_PEER_separate_CL_0002057_LPS_24h_chr1_37990219_G_C_cs_1	1130	0.0120775546200466	5.1262328258914	1	F3	PEER	separate	CL_0002057_LPS_24h	chr1	2.36456122177859e-08	0.535595193703594	1	9.43396226415094e-10	689	1506	1276	FALSE	FALSE	0	0	37952824	rs17465651
chr1_37990219_G_C	F3_PEER_separate_CL_0002057_LPS_24h	chr1_37953546_C_T	chr1_37990219_G_C	F3_PEER_separate_CL_0002057_LPS_24h_chr1_37990219_G_C_cs_1	1131	0.0120775546200466	5.1262328258914	1	F3	PEER	separate	CL_0002057_LPS_24h	chr1	2.36456122177859e-08	0.535595193703594	1	9.43396226415094e-10	689	1506	1276	FALSE	FALSE	0	0	37953546
chr1_37990219_G_C	Cluster_3573_funcExplorer_integrated	chr1_37953546_C_T	chr1_37990219_G_C	Cluster_3573_funcExplorer_integrated_CL_0002057_LPS_24h_chr1_37990219_G_C_cs_1	1131	0.0053280976973592	-4.48721396551748	1	Cluster_3573	funcExplorer	integrated	CL_0002057_LPS_24h	chr1	1.21934427352093e-08	0.00294660092417104	0.0623114789920247	4e-10	9	1506	15	FALSE	FALSE	5.15804048528119e-07	2.06321619411248e-06	37953546
chr1_37990219_G_C	Cluster_15146_funcExplorer_integrated	chr1_37953546_C_T	chr1_37995647_C_A	Cluster_15146_funcExplorer_integrated_CL_0002057_LPS_24h_chr1_37995647_C_A_cs_1	1114	0.00846054439322275	5.07454309768209	1	Cluster_15146	funcExplorer	integrated	CL_0002057_LPS_24h	chr1	1.11795902297178e-08	0.0027161400362304	0.0574379453351261	4e-10	5	1506	6	FALSE	FALSE	2.05083669524856e-05	8.20334678099425e-05	37953546
chr1_37990219_G_C	Cluster_15146_funcExplorer_integrated	chr1_37962603_CAA_C	chr1_37995647_C_A	Cluster_15146_funcExplorer_integrated_CL_0002057_LPS_24h_chr1_37995647_C_A_cs_1	1142	0.0226405855584993	-5.30946791202421	1	Cluster_15146	funcExplorer	integrated	CL_0002057_LPS_24h	chr1	1.11795902297178e-08	0.0027161400362304	0.0574379453351261	4e-10	5	1506	6	FALSE	FALSE	2.05083669524856e-05	8.20334678099425e-05	37962603	rs58893352; rs10562404
chr1_37990219_G_C	F3_PEER_separate_CL_0002057_LPS_24h	chr1_37966241_TA_T	chr1_37990219_G_C	F3_PEER_separate_CL_0002057_LPS_24h_chr1_37990219_G_C_cs_1	1172	0.0120775546200466	5.1262328258914	1	F3	PEER	separate	CL_0002057_LPS_24h	chr1	2.36456122177859e-08	0.535595193703594	1	9.43396226415094e-10	689	1506	1276	FALSE	FALSE	0	0	37966241	rs67524417
chr1_37990219_G_C	Cluster_15146_funcExplorer_integrated	chr1_37966241_TA_T	chr1_37995647_C_A	Cluster_15146_funcExplorer_integrated_CL_0002057_LPS_24h_chr1_37995647_C_A_cs_1	1155	0.00846054439322275	5.07454309768209	1	Cluster_15146	funcExplorer	integrated	CL_0002057_LPS_24h	chr1	1.11795902297178e-08	0.0027161400362304	0.0574379453351261	4e-10	5	1506	6	FALSE	FALSE	2.05083669524856e-05	8.20334678099425e-05	37966241	rs67524417
chr1_37990219_G_C	Cluster_3573_funcExplorer_integrated	chr1_37966241_TA_T	chr1_37990219_G_C	Cluster_3573_funcExplorer_integrated_CL_0002057_LPS_24h_chr1_37990219_G_C_cs_1	1172	0.0053280976973592	-4.48721396551748	1	Cluster_3573	funcExplorer	integrated	CL_0002057_LPS_24h	chr1	1.21934427352093e-08	0.00294660092417104	0.0623114789920247	4e-10	9	1506	15	FALSE	FALSE	5.15804048528119e-07	2.06321619411248e-06	37966241	rs67524417
chr1_37990219_G_C	Cluster_15146_funcExplorer_integrated	chr1_37968634_G_A	chr1_37995647_C_A	Cluster_15146_funcExplorer_integrated_CL_0002057_LPS_24h_chr1_37995647_C_A_cs_1	1159	0.01894285143969	-5.29960046239666	1	Cluster_15146	funcExplorer	integrated	CL_0002057_LPS_24h	chr1	1.11795902297178e-08	0.0027161400362304	0.0574379453351261	4e-10	5	1506	6	FALSE	FALSE	2.05083669524856e-05	8.20334678099425e-05	37968634	rs28428561
chr1_37990219_G_C	Cluster_3573_funcExplorer_integrated	chr1_37968634_G_A	chr1_37990219_G_C	Cluster_3573_funcExplorer_integrated_CL_0002057_LPS_24h_chr1_37990219_G_C_cs_1	1176	0.00561167211760349	4.56658663519185	1	Cluster_3573	funcExplorer	integrated	CL_0002057_LPS_24h	chr1	1.21934427352093e-08	0.00294660092417104	0.0623114789920247	4e-10	9	1506	15	FALSE	FALSE	5.15804048528119e-07	2.06321619411248e-06	37968634	rs28428561
chr1_37990219_G_C	Cluster_3573_funcExplorer_integrated	chr1_37975515_C_CA	chr1_37990219_G_C	Cluster_3573_funcExplorer_integrated_CL_0002057_LPS_24h_chr1_37990219_G_C_cs_1	1188	0.00757168859456347	4.70533076734953	1	Cluster_3573	funcExplorer	integrated	CL_0002057_LPS_24h	chr1	1.21934427352093e-08	0.00294660092417104	0.0623114789920247	4e-10	9	1506	15	FALSE	FALSE	5.15804048528119e-07	2.06321619411248e-06	37975515	rs35993262
chr1_37990219_G_C	Cluster_15146_funcExplorer_integrated	chr1_37975515_C_CA	chr1_37995647_C_A	Cluster_15146_funcExplorer_integrated_CL_0002057_LPS_24h_chr1_37995647_C_A_cs_1	1171	0.0179310059458982	-5.27151046461492	1	Cluster_15146	funcExplorer	integrated	CL_0002057_LPS_24h	chr1	1.11795902297178e-08	0.0027161400362304	0.0574379453351261	4e-10	5	1506	6	FALSE	FALSE	2.05083669524856e-05	8.20334678099425e-05	37975515	rs35993262
chr1_37990219_G_C	Cluster_15146_funcExplorer_integrated	chr1_37979077_T_C	chr1_37995647_C_A	Cluster_15146_funcExplorer_integrated_CL_0002057_LPS_24h_chr1_37995647_C_A_cs_1	1181	0.0179310059458982	-5.27151046461492	1	Cluster_15146	funcExplorer	integrated	CL_0002057_LPS_24h	chr1	1.11795902297178e-08	0.0027161400362304	0.0574379453351261	4e-10	5	1506	6	FALSE	FALSE	2.05083669524856e-05	8.20334678099425e-05	37979077	rs7555461
chr1_37990219_G_C	Cluster_3573_funcExplorer_integrated	chr1_37979077_T_C	chr1_37990219_G_C	Cluster_3573_funcExplorer_integrated_CL_0002057_LPS_24h_chr1_37990219_G_C_cs_1	1198	0.00757168859456347	4.70533076734953	1	Cluster_3573	funcExplorer	integrated	CL_0002057_LPS_24h	chr1	1.21934427352093e-08	0.00294660092417104	0.0623114789920247	4e-10	9	1506	15	FALSE	FALSE	5.15804048528119e-07	2.06321619411248e-06	37979077	rs7555461
chr1_37990219_G_C	Cluster_14369_funcExplorer_separate_CL_0002057_LPS_24h	chr1_37979863_AAAAACAAAAC_A	chr1_37992347_TC_T	Cluster_14369_funcExplorer_separate_CL_0002057_LPS_24h_chr1_37992347_TC_T_cs_1	1191	0.0131576489404636	-5.3495434662209	1	Cluster_14369	funcExplorer	separate	CL_0002057_LPS_24h	chr1	7.56574770544501e-09	0.0569076649330489	1	3.37837837837838e-10	17	1506	18	FALSE	FALSE	5.15790520347694e-18	2.06316208139078e-17	37979863	rs141707261; rs565082621
chr1_37990219_G_C	F3_PEER_separate_CL_0002057_LPS_24h	chr1_37979863_AAAAACAAAAC_A	chr1_37990219_G_C	F3_PEER_separate_CL_0002057_LPS_24h_chr1_37990219_G_C_cs_1	1199	0.0332289018511104	5.40278689608081	1	F3	PEER	separate	CL_0002057_LPS_24h	chr1	2.36456122177859e-08	0.535595193703594	1	9.43396226415094e-10	689	1506	1276	FALSE	FALSE	0	0	37979863	rs141707261; rs565082621
chr1_37990219_G_C	Cluster_3573_funcExplorer_integrated	chr1_37979863_AAAAACAAAAC_A	chr1_37990219_G_C	Cluster_3573_funcExplorer_integrated_CL_0002057_LPS_24h_chr1_37990219_G_C_cs_1	1199	0.0135949914842864	-4.83666101728767	1	Cluster_3573	funcExplorer	integrated	CL_0002057_LPS_24h	chr1	1.21934427352093e-08	0.00294660092417104	0.0623114789920247	4e-10	9	1506	15	FALSE	FALSE	5.15804048528119e-07	2.06321619411248e-06	37979863	rs141707261; rs565082621
chr1_37990219_G_C	Cluster_15146_funcExplorer_integrated	chr1_37979863_AAAAACAAAAC_A	chr1_37995647_C_A	Cluster_15146_funcExplorer_integrated_CL_0002057_LPS_24h_chr1_37995647_C_A_cs_1	1182	0.0143505621987621	5.23236721373784	1	Cluster_15146	funcExplorer	integrated	CL_0002057_LPS_24h	chr1	1.11795902297178e-08	0.0027161400362304	0.0574379453351261	4e-10	5	1506	6	FALSE	FALSE	2.05083669524856e-05	8.20334678099425e-05	37979863	rs141707261; rs565082621
chr1_37990219_G_C	Cluster_15146_funcExplorer_integrated	chr1_37979982_T_A	chr1_37995647_C_A	Cluster_15146_funcExplorer_integrated_CL_0002057_LPS_24h_chr1_37995647_C_A_cs_1	1183	0.01894285143969	-5.29960046239666	1	Cluster_15146	funcExplorer	integrated	CL_0002057_LPS_24h	chr1	1.11795902297178e-08	0.0027161400362304	0.0574379453351261	4e-10	5	1506	6	FALSE	FALSE	2.05083669524856e-05	8.20334678099425e-05	37979982	rs10890238
chr1_37990219_G_C	Cluster_3573_funcExplorer_integrated	chr1_37979982_T_A	chr1_37990219_G_C	Cluster_3573_funcExplorer_integrated_CL_0002057_LPS_24h_chr1_37990219_G_C_cs_1	1200	0.00561167211760349	4.56658663519185	1	Cluster_3573	funcExplorer	integrated	CL_0002057_LPS_24h	chr1	1.21934427352093e-08	0.00294660092417104	0.0623114789920247	4e-10	9	1506	15	FALSE	FALSE	5.15804048528119e-07	2.06321619411248e-06	37979982	rs10890238
chr1_37990219_G_C	Cluster_14369_funcExplorer_separate_CL_0002057_LPS_24h	chr1_37981314_G_A	chr1_37992347_TC_T	Cluster_14369_funcExplorer_separate_CL_0002057_LPS_24h_chr1_37992347_TC_T_cs_1	1195	0.00875757208562811	-5.24394586846979	1	Cluster_14369	funcExplorer	separate	CL_0002057_LPS_24h	chr1	7.56574770544501e-09	0.0569076649330489	1	3.37837837837838e-10	17	1506	18	FALSE	FALSE	5.15790520347694e-18	2.06316208139078e-17	37981314	rs11210825
chr1_37990219_G_C	F3_PEER_separate_CL_0002057_LPS_24h	chr1_37981314_G_A	chr1_37990219_G_C	F3_PEER_separate_CL_0002057_LPS_24h_chr1_37990219_G_C_cs_1	1203	0.0195316879612205	5.27598011793734	1	F3	PEER	separate	CL_0002057_LPS_24h	chr1	2.36456122177859e-08	0.535595193703594	1	9.43396226415094e-10	689	1506	1276	FALSE	FALSE	0	0	37981314	rs11210825
chr1_37990219_G_C	Cluster_3573_funcExplorer_integrated	chr1_37981314_G_A	chr1_37990219_G_C	Cluster_3573_funcExplorer_integrated_CL_0002057_LPS_24h_chr1_37990219_G_C_cs_1	1203	0.00709745897551206	-4.62131843425806	1	Cluster_3573	funcExplorer	integrated	CL_0002057_LPS_24h	chr1	1.21934427352093e-08	0.00294660092417104	0.0623114789920247	4e-10	9	1506	15	FALSE	FALSE	5.15804048528119e-07	2.06321619411248e-06	37981314	rs11210825
chr1_37990219_G_C	Cluster_15146_funcExplorer_integrated	chr1_37981314_G_A	chr1_37995647_C_A	Cluster_15146_funcExplorer_integrated_CL_0002057_LPS_24h_chr1_37995647_C_A_cs_1	1186	0.00764287428357502	5.02746885236318	1	Cluster_15146	funcExplorer	integrated	CL_0002057_LPS_24h	chr1	1.11795902297178e-08	0.0027161400362304	0.0574379453351261	4e-10	5	1506	6	FALSE	FALSE	2.05083669524856e-05	8.20334678099425e-05	37981314	rs11210825
chr1_37990219_G_C	Cluster_15146_funcExplorer_integrated	chr1_37983126_C_G	chr1_37995647_C_A	Cluster_15146_funcExplorer_integrated_CL_0002057_LPS_24h_chr1_37995647_C_A_cs_1	1196	0.00764287428357502	5.02746885236318	1	Cluster_15146	funcExplorer	integrated	CL_0002057_LPS_24h	chr1	1.11795902297178e-08	0.0027161400362304	0.0574379453351261	4e-10	5	1506	6	FALSE	FALSE	2.05083669524856e-05	8.20334678099425e-05	37983126
chr1_37990219_G_C	F3_PEER_separate_CL_0002057_LPS_24h	chr1_37983126_C_G	chr1_37990219_G_C	F3_PEER_separate_CL_0002057_LPS_24h_chr1_37990219_G_C_cs_1	1213	0.0195316879612205	5.27598011793734	1	F3	PEER	separate	CL_0002057_LPS_24h	chr1	2.36456122177859e-08	0.535595193703594	1	9.43396226415094e-10	689	1506	1276	FALSE	FALSE	0	0	37983126
chr1_37990219_G_C	Cluster_3573_funcExplorer_integrated	chr1_37983126_C_G	chr1_37990219_G_C	Cluster_3573_funcExplorer_integrated_CL_0002057_LPS_24h_chr1_37990219_G_C_cs_1	1213	0.00709745897551206	-4.62131843425806	1	Cluster_3573	funcExplorer	integrated	CL_0002057_LPS_24h	chr1	1.21934427352093e-08	0.00294660092417104	0.0623114789920247	4e-10	9	1506	15	FALSE	FALSE	5.15804048528119e-07	2.06321619411248e-06	37983126
chr1_37990219_G_C	Cluster_14369_funcExplorer_separate_CL_0002057_LPS_24h	chr1_37983126_C_G	chr1_37992347_TC_T	Cluster_14369_funcExplorer_separate_CL_0002057_LPS_24h_chr1_37992347_TC_T_cs_1	1205	0.00875757208562811	-5.24394586846979	1	Cluster_14369	funcExplorer	separate	CL_0002057_LPS_24h	chr1	7.56574770544501e-09	0.0569076649330489	1	3.37837837837838e-10	17	1506	18	FALSE	FALSE	5.15790520347694e-18	2.06316208139078e-17	37983126
chr1_37990219_G_C	F3_PEER_separate_CL_0002057_LPS_24h	chr1_37983491_C_T	chr1_37990219_G_C	F3_PEER_separate_CL_0002057_LPS_24h_chr1_37990219_G_C_cs_1	1216	0.0195316879612206	5.27598011793734	1	F3	PEER	separate	CL_0002057_LPS_24h	chr1	2.36456122177859e-08	0.535595193703594	1	9.43396226415094e-10	689	1506	1276	FALSE	FALSE	0	0	37983491
chr1_37990219_G_C	Cluster_3573_funcExplorer_integrated	chr1_37983491_C_T	chr1_37990219_G_C	Cluster_3573_funcExplorer_integrated_CL_0002057_LPS_24h_chr1_37990219_G_C_cs_1	1216	0.00709745897551206	-4.62131843425806	1	Cluster_3573	funcExplorer	integrated	CL_0002057_LPS_24h	chr1	1.21934427352093e-08	0.00294660092417104	0.0623114789920247	4e-10	9	1506	15	FALSE	FALSE	5.15804048528119e-07	2.06321619411248e-06	37983491
chr1_37990219_G_C	Cluster_14369_funcExplorer_separate_CL_0002057_LPS_24h	chr1_37983491_C_T	chr1_37992347_TC_T	Cluster_14369_funcExplorer_separate_CL_0002057_LPS_24h_chr1_37992347_TC_T_cs_1	1208	0.00875757208562811	-5.24394586846979	1	Cluster_14369	funcExplorer	separate	CL_0002057_LPS_24h	chr1	7.56574770544501e-09	0.0569076649330489	1	3.37837837837838e-10	17	1506	18	FALSE	FALSE	5.15790520347694e-18	2.06316208139078e-17	37983491
chr1_37990219_G_C	F3_PEER_separate_CL_0002057_LPS_24h	chr1_37983893_T_C	chr1_37990219_G_C	F3_PEER_separate_CL_0002057_LPS_24h_chr1_37990219_G_C_cs_1	1217	0.0195316879612205	5.27598011793734	1	F3	PEER	separate	CL_0002057_LPS_24h	chr1	2.36456122177859e-08	0.535595193703594	1	9.43396226415094e-10	689	1506	1276	FALSE	FALSE	0	0	37983893	rs11210866
chr1_37990219_G_C	Cluster_3573_funcExplorer_integrated	chr1_37983893_T_C	chr1_37990219_G_C	Cluster_3573_funcExplorer_integrated_CL_0002057_LPS_24h_chr1_37990219_G_C_cs_1	1217	0.00709745897551206	-4.62131843425806	1	Cluster_3573	funcExplorer	integrated	CL_0002057_LPS_24h	chr1	1.21934427352093e-08	0.00294660092417104	0.0623114789920247	4e-10	9	1506	15	FALSE	FALSE	5.15804048528119e-07	2.06321619411248e-06	37983893	rs11210866
chr1_37990219_G_C	Cluster_14369_funcExplorer_separate_CL_0002057_LPS_24h	chr1_37983893_T_C	chr1_37992347_TC_T	Cluster_14369_funcExplorer_separate_CL_0002057_LPS_24h_chr1_37992347_TC_T_cs_1	1209	0.00875757208562811	-5.24394586846979	1	Cluster_14369	funcExplorer	separate	CL_0002057_LPS_24h	chr1	7.56574770544501e-09	0.0569076649330489	1	3.37837837837838e-10	17	1506	18	FALSE	FALSE	5.15790520347694e-18	2.06316208139078e-17	37983893	rs11210866
chr1_37990219_G_C	Cluster_3573_funcExplorer_integrated	chr1_37985412_GT_G	chr1_37990219_G_C	Cluster_3573_funcExplorer_integrated_CL_0002057_LPS_24h_chr1_37990219_G_C_cs_1	1220	0.00837873258850341	-4.67201035144424	1	Cluster_3573	funcExplorer	integrated	CL_0002057_LPS_24h	chr1	1.21934427352093e-08	0.00294660092417104	0.0623114789920247	4e-10	9	1506	15	FALSE	FALSE	5.15804048528119e-07	2.06321619411248e-06	37985412	rs11363172; rs397863386
chr1_37990219_G_C	Cluster_14369_funcExplorer_separate_CL_0002057_LPS_24h	chr1_37985412_GT_G	chr1_37992347_TC_T	Cluster_14369_funcExplorer_separate_CL_0002057_LPS_24h_chr1_37992347_TC_T_cs_1	1212	0.00901015489391888	-5.24032446625125	1	Cluster_14369	funcExplorer	separate	CL_0002057_LPS_24h	chr1	7.56574770544501e-09	0.0569076649330489	1	3.37837837837838e-10	17	1506	18	FALSE	FALSE	5.15790520347694e-18	2.06316208139078e-17	37985412	rs11363172; rs397863386
chr1_37990219_G_C	F3_PEER_separate_CL_0002057_LPS_24h	chr1_37985412_GT_G	chr1_37990219_G_C	F3_PEER_separate_CL_0002057_LPS_24h_chr1_37990219_G_C_cs_1	1220	0.019840086902124	5.27328150506533	1	F3	PEER	separate	CL_0002057_LPS_24h	chr1	2.36456122177859e-08	0.535595193703594	1	9.43396226415094e-10	689	1506	1276	FALSE	FALSE	0	0	37985412	rs11363172; rs397863386
chr1_37990219_G_C	Cluster_15146_funcExplorer_integrated	chr1_37985412_GT_G	chr1_37995647_C_A	Cluster_15146_funcExplorer_integrated_CL_0002057_LPS_24h_chr1_37995647_C_A_cs_1	1203	0.0136116324637683	5.21478228622868	1	Cluster_15146	funcExplorer	integrated	CL_0002057_LPS_24h	chr1	1.11795902297178e-08	0.0027161400362304	0.0574379453351261	4e-10	5	1506	6	FALSE	FALSE	2.05083669524856e-05	8.20334678099425e-05	37985412	rs11363172; rs397863386
chr1_37990219_G_C	Cluster_15146_funcExplorer_integrated	chr1_37986909_A_G	chr1_37995647_C_A	Cluster_15146_funcExplorer_integrated_CL_0002057_LPS_24h_chr1_37995647_C_A_cs_1	1208	0.0179310059458982	-5.27151046461492	1	Cluster_15146	funcExplorer	integrated	CL_0002057_LPS_24h	chr1	1.11795902297178e-08	0.0027161400362304	0.0574379453351261	4e-10	5	1506	6	FALSE	FALSE	2.05083669524856e-05	8.20334678099425e-05	37986909	rs12138115
chr1_37990219_G_C	Cluster_3573_funcExplorer_integrated	chr1_37986909_A_G	chr1_37990219_G_C	Cluster_3573_funcExplorer_integrated_CL_0002057_LPS_24h_chr1_37990219_G_C_cs_1	1225	0.00757168859456347	4.70533076734953	1	Cluster_3573	funcExplorer	integrated	CL_0002057_LPS_24h	chr1	1.21934427352093e-08	0.00294660092417104	0.0623114789920247	4e-10	9	1506	15	FALSE	FALSE	5.15804048528119e-07	2.06321619411248e-06	37986909	rs12138115
chr1_37990219_G_C	Cluster_3573_funcExplorer_integrated	chr1_37987358_C_T	chr1_37990219_G_C	Cluster_3573_funcExplorer_integrated_CL_0002057_LPS_24h_chr1_37990219_G_C_cs_1	1226	0.00709745897551206	-4.62131843425806	1	Cluster_3573	funcExplorer	integrated	CL_0002057_LPS_24h	chr1	1.21934427352093e-08	0.00294660092417104	0.0623114789920247	4e-10	9	1506	15	FALSE	FALSE	5.15804048528119e-07	2.06321619411248e-06	37987358	rs12024166
chr1_37990219_G_C	F3_PEER_separate_CL_0002057_LPS_24h	chr1_37987358_C_T	chr1_37990219_G_C	F3_PEER_separate_CL_0002057_LPS_24h_chr1_37990219_G_C_cs_1	1226	0.0195316879612205	5.27598011793734	1	F3	PEER	separate	CL_0002057_LPS_24h	chr1	2.36456122177859e-08	0.535595193703594	1	9.43396226415094e-10	689	1506	1276	FALSE	FALSE	0	0	37987358	rs12024166
chr1_37990219_G_C	Cluster_14369_funcExplorer_separate_CL_0002057_LPS_24h	chr1_37987358_C_T	chr1_37992347_TC_T	Cluster_14369_funcExplorer_separate_CL_0002057_LPS_24h_chr1_37992347_TC_T_cs_1	1218	0.00875757208562811	-5.24394586846979	1	Cluster_14369	funcExplorer	separate	CL_0002057_LPS_24h	chr1	7.56574770544501e-09	0.0569076649330489	1	3.37837837837838e-10	17	1506	18	FALSE	FALSE	5.15790520347694e-18	2.06316208139078e-17	37987358	rs12024166
chr1_37990219_G_C	Cluster_3573_funcExplorer_integrated	chr1_37987369_G_A	chr1_37990219_G_C	Cluster_3573_funcExplorer_integrated_CL_0002057_LPS_24h_chr1_37990219_G_C_cs_1	1227	0.00709745897551206	-4.62131843425806	1	Cluster_3573	funcExplorer	integrated	CL_0002057_LPS_24h	chr1	1.21934427352093e-08	0.00294660092417104	0.0623114789920247	4e-10	9	1506	15	FALSE	FALSE	5.15804048528119e-07	2.06321619411248e-06	37987369	rs12044531
chr1_37990219_G_C	F3_PEER_separate_CL_0002057_LPS_24h	chr1_37987369_G_A	chr1_37990219_G_C	F3_PEER_separate_CL_0002057_LPS_24h_chr1_37990219_G_C_cs_1	1227	0.0195316879612205	5.27598011793734	1	F3	PEER	separate	CL_0002057_LPS_24h	chr1	2.36456122177859e-08	0.535595193703594	1	9.43396226415094e-10	689	1506	1276	FALSE	FALSE	0	0	37987369	rs12044531
chr1_37990219_G_C	Cluster_14369_funcExplorer_separate_CL_0002057_LPS_24h	chr1_37987369_G_A	chr1_37992347_TC_T	Cluster_14369_funcExplorer_separate_CL_0002057_LPS_24h_chr1_37992347_TC_T_cs_1	1219	0.00875757208562811	-5.24394586846979	1	Cluster_14369	funcExplorer	separate	CL_0002057_LPS_24h	chr1	7.56574770544501e-09	0.0569076649330489	1	3.37837837837838e-10	17	1506	18	FALSE	FALSE	5.15790520347694e-18	2.06316208139078e-17	37987369	rs12044531
chr1_37990219_G_C	Cluster_15146_funcExplorer_integrated	chr1_37990219_G_C	chr1_37995647_C_A	Cluster_15146_funcExplorer_integrated_CL_0002057_LPS_24h_chr1_37995647_C_A_cs_1	1214	0.0898819547117674	5.75840932103761	1	Cluster_15146	funcExplorer	integrated	CL_0002057_LPS_24h	chr1	1.11795902297178e-08	0.0027161400362304	0.0574379453351261	4e-10	5	1506	6	FALSE	FALSE	2.05083669524856e-05	8.20334678099425e-05	37990219	rs4360494
chr1_37990219_G_C	Cluster_14369_funcExplorer_separate_CL_0002057_LPS_24h	chr1_37990219_G_C	chr1_37992347_TC_T	Cluster_14369_funcExplorer_separate_CL_0002057_LPS_24h_chr1_37992347_TC_T_cs_1	1223	0.223118860971681	-5.81234996118035	1	Cluster_14369	funcExplorer	separate	CL_0002057_LPS_24h	chr1	7.56574770544501e-09	0.0569076649330489	1	3.37837837837838e-10	17	1506	18	FALSE	FALSE	5.15790520347694e-18	2.06316208139078e-17	37990219	rs4360494
chr1_37990219_G_C	F3_PEER_separate_CL_0002057_LPS_24h	chr1_37990219_G_C	chr1_37990219_G_C	F3_PEER_separate_CL_0002057_LPS_24h_chr1_37990219_G_C_cs_1	1231	0.237507032556192	5.7792089557355	1	F3	PEER	separate	CL_0002057_LPS_24h	chr1	2.36456122177859e-08	0.535595193703594	1	9.43396226415094e-10	689	1506	1276	FALSE	FALSE	0	0	37990219	rs4360494
chr1_37990219_G_C	Cluster_3573_funcExplorer_integrated	chr1_37990219_G_C	chr1_37990219_G_C	Cluster_3573_funcExplorer_integrated_CL_0002057_LPS_24h_chr1_37990219_G_C_cs_1	1231	0.331703894901676	-5.65140800212572	1	Cluster_3573	funcExplorer	integrated	CL_0002057_LPS_24h	chr1	1.21934427352093e-08	0.00294660092417104	0.0623114789920247	4e-10	9	1506	15	FALSE	FALSE	5.15804048528119e-07	2.06321619411248e-06	37990219	rs4360494
chr1_37990219_G_C	Cluster_14369_funcExplorer_separate_CL_0002057_LPS_24h	chr1_37990434_G_A	chr1_37992347_TC_T	Cluster_14369_funcExplorer_separate_CL_0002057_LPS_24h_chr1_37992347_TC_T_cs_1	1225	0.00651481069681203	4.93905436171177	1	Cluster_14369	funcExplorer	separate	CL_0002057_LPS_24h	chr1	7.56574770544501e-09	0.0569076649330489	1	3.37837837837838e-10	17	1506	18	FALSE	FALSE	5.15790520347694e-18	2.06316208139078e-17	37990434
chr1_37990219_G_C	Cluster_15146_funcExplorer_integrated	chr1_37990434_G_A	chr1_37995647_C_A	Cluster_15146_funcExplorer_integrated_CL_0002057_LPS_24h_chr1_37995647_C_A_cs_1	1216	0.0232434285454869	-5.38590582830278	1	Cluster_15146	funcExplorer	integrated	CL_0002057_LPS_24h	chr1	1.11795902297178e-08	0.0027161400362304	0.0574379453351261	4e-10	5	1506	6	FALSE	FALSE	2.05083669524856e-05	8.20334678099425e-05	37990434
chr1_37990219_G_C	Cluster_3573_funcExplorer_integrated	chr1_37990434_G_A	chr1_37990219_G_C	Cluster_3573_funcExplorer_integrated_CL_0002057_LPS_24h_chr1_37990219_G_C_cs_1	1233	0.0229872464078054	5.05602433712632	1	Cluster_3573	funcExplorer	integrated	CL_0002057_LPS_24h	chr1	1.21934427352093e-08	0.00294660092417104	0.0623114789920247	4e-10	9	1506	15	FALSE	FALSE	5.15804048528119e-07	2.06321619411248e-06	37990434
chr1_37990219_G_C	Cluster_3573_funcExplorer_integrated	chr1_37990772_CAA_C	chr1_37990219_G_C	Cluster_3573_funcExplorer_integrated_CL_0002057_LPS_24h_chr1_37990219_G_C_cs_1	1234	0.0138276605422976	4.89959594587072	1	Cluster_3573	funcExplorer	integrated	CL_0002057_LPS_24h	chr1	1.21934427352093e-08	0.00294660092417104	0.0623114789920247	4e-10	9	1506	15	FALSE	FALSE	5.15804048528119e-07	2.06321619411248e-06	37990772	rs150361750
chr1_37990219_G_C	Cluster_15146_funcExplorer_integrated	chr1_37990772_CAA_C	chr1_37995647_C_A	Cluster_15146_funcExplorer_integrated_CL_0002057_LPS_24h_chr1_37995647_C_A_cs_1	1217	0.0145712938272564	-5.24536844044063	1	Cluster_15146	funcExplorer	integrated	CL_0002057_LPS_24h	chr1	1.11795902297178e-08	0.0027161400362304	0.0574379453351261	4e-10	5	1506	6	FALSE	FALSE	2.05083669524856e-05	8.20334678099425e-05	37990772	rs150361750
chr1_37990219_G_C	Cluster_3573_funcExplorer_integrated	chr1_37992347_TC_T	chr1_37990219_G_C	Cluster_3573_funcExplorer_integrated_CL_0002057_LPS_24h_chr1_37990219_G_C_cs_1	1236	0.126696057829636	-5.42704004399104	1	Cluster_3573	funcExplorer	integrated	CL_0002057_LPS_24h	chr1	1.21934427352093e-08	0.00294660092417104	0.0623114789920247	4e-10	9	1506	15	FALSE	FALSE	5.15804048528119e-07	2.06321619411248e-06	37992347	rs67963450
chr1_37990219_G_C	Cluster_15146_funcExplorer_integrated	chr1_37992347_TC_T	chr1_37995647_C_A	Cluster_15146_funcExplorer_integrated_CL_0002057_LPS_24h_chr1_37995647_C_A_cs_1	1219	0.0605880292540251	5.6332466184315	1	Cluster_15146	funcExplorer	integrated	CL_0002057_LPS_24h	chr1	1.11795902297178e-08	0.0027161400362304	0.0574379453351261	4e-10	5	1506	6	FALSE	FALSE	2.05083669524856e-05	8.20334678099425e-05	37992347	rs67963450
chr1_37990219_G_C	F3_PEER_separate_CL_0002057_LPS_24h	chr1_37992347_TC_T	chr1_37990219_G_C	F3_PEER_separate_CL_0002057_LPS_24h_chr1_37990219_G_C_cs_1	1236	0.141480392891804	5.63175681623484	1	F3	PEER	separate	CL_0002057_LPS_24h	chr1	2.36456122177859e-08	0.535595193703594	1	9.43396226415094e-10	689	1506	1276	FALSE	FALSE	0	0	37992347	rs67963450
chr1_37990219_G_C	Cluster_14369_funcExplorer_separate_CL_0002057_LPS_24h	chr1_37992347_TC_T	chr1_37992347_TC_T	Cluster_14369_funcExplorer_separate_CL_0002057_LPS_24h_chr1_37992347_TC_T_cs_1	1228	0.41889707726409	-5.97479158575089	1	Cluster_14369	funcExplorer	separate	CL_0002057_LPS_24h	chr1	7.56574770544501e-09	0.0569076649330489	1	3.37837837837838e-10	17	1506	18	FALSE	FALSE	5.15790520347694e-18	2.06316208139078e-17	37992347	rs67963450
chr1_37990219_G_C	Cluster_15146_funcExplorer_integrated	chr1_37995647_C_A	chr1_37995647_C_A	Cluster_15146_funcExplorer_integrated_CL_0002057_LPS_24h_chr1_37995647_C_A_cs_1	1221	0.0966839648368012	5.78081772344345	1	Cluster_15146	funcExplorer	integrated	CL_0002057_LPS_24h	chr1	1.11795902297178e-08	0.0027161400362304	0.0574379453351261	4e-10	5	1506	6	FALSE	FALSE	2.05083669524856e-05	8.20334678099425e-05	37995647	rs61776719
chr1_37990219_G_C	F3_PEER_separate_CL_0002057_LPS_24h	chr1_37995647_C_A	chr1_37990219_G_C	F3_PEER_separate_CL_0002057_LPS_24h_chr1_37990219_G_C_cs_1	1238	0.160452856693372	5.69894120447701	1	F3	PEER	separate	CL_0002057_LPS_24h	chr1	2.36456122177859e-08	0.535595193703594	1	9.43396226415094e-10	689	1506	1276	FALSE	FALSE	0	0	37995647	rs61776719
chr1_37990219_G_C	Cluster_3573_funcExplorer_integrated	chr1_37995647_C_A	chr1_37990219_G_C	Cluster_3573_funcExplorer_integrated_CL_0002057_LPS_24h_chr1_37990219_G_C_cs_1	1238	0.182563382024211	-5.52449247370498	1	Cluster_3573	funcExplorer	integrated	CL_0002057_LPS_24h	chr1	1.21934427352093e-08	0.00294660092417104	0.0623114789920247	4e-10	9	1506	15	FALSE	FALSE	5.15804048528119e-07	2.06321619411248e-06	37995647	rs61776719
chr1_37990219_G_C	Cluster_14369_funcExplorer_separate_CL_0002057_LPS_24h	chr1_37995647_C_A	chr1_37992347_TC_T	Cluster_14369_funcExplorer_separate_CL_0002057_LPS_24h_chr1_37992347_TC_T_cs_1	1230	0.126299433987127	-5.69932875482891	1	Cluster_14369	funcExplorer	separate	CL_0002057_LPS_24h	chr1	7.56574770544501e-09	0.0569076649330489	1	3.37837837837838e-10	17	1506	18	FALSE	FALSE	5.15790520347694e-18	2.06316208139078e-17	37995647	rs61776719
chr1_37990219_G_C	Cluster_14369_funcExplorer_separate_CL_0002057_LPS_24h	chr1_37996149_C_T	chr1_37992347_TC_T	Cluster_14369_funcExplorer_separate_CL_0002057_LPS_24h_chr1_37992347_TC_T_cs_1	1232	0.126299433987127	-5.69932875482891	1	Cluster_14369	funcExplorer	separate	CL_0002057_LPS_24h	chr1	7.56574770544501e-09	0.0569076649330489	1	3.37837837837838e-10	17	1506	18	FALSE	FALSE	5.15790520347694e-18	2.06316208139078e-17	37996149	rs67631072
chr1_37990219_G_C	F3_PEER_separate_CL_0002057_LPS_24h	chr1_37996149_C_T	chr1_37990219_G_C	F3_PEER_separate_CL_0002057_LPS_24h_chr1_37990219_G_C_cs_1	1240	0.160452856693372	5.69894120447701	1	F3	PEER	separate	CL_0002057_LPS_24h	chr1	2.36456122177859e-08	0.535595193703594	1	9.43396226415094e-10	689	1506	1276	FALSE	FALSE	0	0	37996149	rs67631072
chr1_37990219_G_C	Cluster_3573_funcExplorer_integrated	chr1_37996149_C_T	chr1_37990219_G_C	Cluster_3573_funcExplorer_integrated_CL_0002057_LPS_24h_chr1_37990219_G_C_cs_1	1240	0.182563382024211	-5.52449247370498	1	Cluster_3573	funcExplorer	integrated	CL_0002057_LPS_24h	chr1	1.21934427352093e-08	0.00294660092417104	0.0623114789920247	4e-10	9	1506	15	FALSE	FALSE	5.15804048528119e-07	2.06321619411248e-06	37996149	rs67631072
chr1_37990219_G_C	Cluster_15146_funcExplorer_integrated	chr1_37996149_C_T	chr1_37995647_C_A	Cluster_15146_funcExplorer_integrated_CL_0002057_LPS_24h_chr1_37995647_C_A_cs_1	1223	0.0966839648368012	5.78081772344345	1	Cluster_15146	funcExplorer	integrated	CL_0002057_LPS_24h	chr1	1.11795902297178e-08	0.0027161400362304	0.0574379453351261	4e-10	5	1506	6	FALSE	FALSE	2.05083669524856e-05	8.20334678099425e-05	37996149	rs67631072
chr1_37990219_G_C	Cluster_15146_funcExplorer_integrated	chr1_37997832_C_T	chr1_37995647_C_A	Cluster_15146_funcExplorer_integrated_CL_0002057_LPS_24h_chr1_37995647_C_A_cs_1	1225	0.0132946117925221	-5.22332248651001	1	Cluster_15146	funcExplorer	integrated	CL_0002057_LPS_24h	chr1	1.11795902297178e-08	0.0027161400362304	0.0574379453351261	4e-10	5	1506	6	FALSE	FALSE	2.05083669524856e-05	8.20334678099425e-05	37997832	rs7366048
chr1_37990219_G_C	Cluster_3573_funcExplorer_integrated	chr1_37997832_C_T	chr1_37990219_G_C	Cluster_3573_funcExplorer_integrated_CL_0002057_LPS_24h_chr1_37990219_G_C_cs_1	1242	0.0126456547406566	4.87278981103749	1	Cluster_3573	funcExplorer	integrated	CL_0002057_LPS_24h	chr1	1.21934427352093e-08	0.00294660092417104	0.0623114789920247	4e-10	9	1506	15	FALSE	FALSE	5.15804048528119e-07	2.06321619411248e-06	37997832	rs7366048
chr1_4825595_C_G	LV.61_PLIER_integrated	chr1_4825595_C_G	chr1_4825595_C_G	LV.61_PLIER_integrated_CL_0000624_naive_chr1_4825595_C_G_cs_1	2198	0.969528087333327	5.73549741699405	1	LV.61	PLIER	integrated	CL_0000624_naive	chr1	1.00872470596047e-08	0.65387083817918	1	5.68181818181818e-10	15	409	839	FALSE	FALSE	0.841355361453804	1	4825595	rs10799264
chr1_4825595_C_G	IC157_ICA_integrated	chr1_4825595_C_G	chr1_4825595_C_G	IC157_ICA_integrated_CL_0000624_naive_chr1_4825595_C_G_cs_1	2198	0.978385959010811	-5.66400332090148	1	IC157	ICA	integrated	CL_0000624_naive	chr1	1.87913400883736e-08	0.942369413171463	1	2.94117647058824e-10	10	409	963	FALSE	FALSE	0.998408675152435	1	4825595	rs10799264
chr1_50554388_T_G	MEgreen_WGCNA_integrated	chr1_50554388_T_G	chr1_50554388_T_G	MEgreen_WGCNA_integrated_CL_0000625_naive_chr1_50554388_T_G_cs_1	691	0.502360644164542	-5.52146161067349	1	MEgreen	WGCNA	integrated	CL_0000625_naive	chr1	3.95470643099684e-08	0.772059600104871	1	1e-09	41	315	681	FALSE	FALSE	2.43662169087879e-12	2.43662169087879e-12	50554388	rs1278638
chr1_50554388_T_G	MEgreen_WGCNA_integrated	chr1_50554390_T_G	chr1_50554388_T_G	MEgreen_WGCNA_integrated_CL_0000625_naive_chr1_50554388_T_G_cs_1	692	0.502360644164542	-5.52146161067349	1	MEgreen	WGCNA	integrated	CL_0000625_naive	chr1	3.95470643099684e-08	0.772059600104871	1	1e-09	41	315	681	FALSE	FALSE	2.43662169087879e-12	2.43662169087879e-12	50554390	rs34024738
chr1_57325505_C_T	F3_PEER_integrated	chr1_57325505_C_T	chr1_57325505_C_T	F3_PEER_integrated_CL_0000775_naive_chr1_57325505_C_T_cs_1	1270	0.981719035979541	5.59954619004061	1	F3	PEER	integrated	CL_0000775_naive	chr1	4.89030568636502e-08	0.239871887186063	1	1.02040816326531e-09	50	302	1349	FALSE	FALSE	4.62341460792375e-08	9.2468292158475e-08	57325505
chr1_57325505_C_T	IC165_ICA_integrated	chr1_57325505_C_T	chr1_57325505_C_T	IC165_ICA_integrated_CL_0000775_naive_chr1_57325505_C_T_cs_1	1270	0.997109129341618	5.67703812311827	1	IC165	ICA	integrated	CL_0000775_naive	chr1	2.89351523019987e-08	0.985124797038257	1	2.94117647058824e-10	16	302	1010	FALSE	FALSE	0.596300742665256	1	57325505
chr1_77003531_A_G	Cluster_2643_funcExplorer_integrated	chr1_77003531_A_G	chr1_77003531_A_G	Cluster_2643_funcExplorer_integrated_CL_0000624_naive_chr1_77003531_A_G_cs_1	1285	0.999630285512521	-5.58665035779976	1	Cluster_2643	funcExplorer	integrated	CL_0000624_naive	chr1	2.01267687265459e-08	0.00253619760747649	0.053632720549816	4e-10	5	10	19	FALSE	FALSE	1.67056022612628e-13	5.01168067837884e-13	77003531
chr1_77003531_A_G	Cluster_4284_funcExplorer_separate_CL_0000624_naive	chr1_77003531_A_G	chr1_77003531_A_G	Cluster_4284_funcExplorer_separate_CL_0000624_naive_chr1_77003531_A_G_cs_1	1285	0.999557303901209	-5.6196141160273	1	Cluster_4284	funcExplorer	separate	CL_0000624_naive	chr1	3.57907243085727e-08	0.332965645778548	1	3.125e-10	9	10	52	FALSE	FALSE	5.56787104537788e-23	1.67036131361336e-22	77003531
chr1_77003531_A_G	MEsalmon4_WGCNA_separate_CL_0000624_naive	chr1_77003531_A_G	chr1_77003531_A_G	MEsalmon4_WGCNA_separate_CL_0000624_naive_chr1_77003531_A_G_cs_1	1285	0.999584618511506	-5.62909234006128	1	MEsalmon4	WGCNA	separate	CL_0000624_naive	chr1	3.60979105224707e-08	0.222048773276523	1	9.61538461538462e-10	8	10	20	FALSE	FALSE	1.75317908584102e-23	5.25953725752305e-23	77003531
chr1_78994360_G_A	F45_PEER_integrated	chr1_78994360_G_A	chr1_78994360_G_A	F45_PEER_integrated_CL_0000236_naive_chr1_78994360_G_A_cs_1	1409	0.154138821396485	5.57234567869912	1	F45	PEER	integrated	CL_0000236_naive	chr1	4.2048147844134e-08	0.415771769284978	1	1.02040816326531e-09	5	45	991	FALSE	FALSE	0.0932622887586085	0.0932622887586085	78994360	rs12029674
chr1_78994360_G_A	F45_PEER_integrated	chr1_78994949_C_G	chr1_78994360_G_A	F45_PEER_integrated_CL_0000236_naive_chr1_78994360_G_A_cs_1	1410	0.154138821396485	5.57234567869912	1	F45	PEER	integrated	CL_0000236_naive	chr1	4.2048147844134e-08	0.415771769284978	1	1.02040816326531e-09	5	45	991	FALSE	FALSE	0.0932622887586085	0.0932622887586085	78994949
chr1_78994360_G_A	F45_PEER_integrated	chr1_78996338_C_CAGCTAATAT	chr1_78994360_G_A	F45_PEER_integrated_CL_0000236_naive_chr1_78994360_G_A_cs_1	1411	0.154138821396485	5.57234567869912	1	F45	PEER	integrated	CL_0000236_naive	chr1	4.2048147844134e-08	0.415771769284978	1	1.02040816326531e-09	5	45	991	FALSE	FALSE	0.0932622887586085	0.0932622887586085	78996338	rs112588621; rs202051996
chr1_78994360_G_A	F45_PEER_integrated	chr1_78996352_C_A	chr1_78994360_G_A	F45_PEER_integrated_CL_0000236_naive_chr1_78994360_G_A_cs_1	1412	0.154138821396485	5.57234567869912	1	F45	PEER	integrated	CL_0000236_naive	chr1	4.2048147844134e-08	0.415771769284978	1	1.02040816326531e-09	5	45	991	FALSE	FALSE	0.0932622887586085	0.0932622887586085	78996352	rs77517135
chr1_78994360_G_A	F45_PEER_integrated	chr1_78996581_T_C	chr1_78994360_G_A	F45_PEER_integrated_CL_0000236_naive_chr1_78994360_G_A_cs_1	1413	0.154138821396485	5.57234567869912	1	F45	PEER	integrated	CL_0000236_naive	chr1	4.2048147844134e-08	0.415771769284978	1	1.02040816326531e-09	5	45	991	FALSE	FALSE	0.0932622887586085	0.0932622887586085	78996581	rs2069069
chr1_78994360_G_A	F45_PEER_integrated	chr1_78998257_T_TG	chr1_78994360_G_A	F45_PEER_integrated_CL_0000236_naive_chr1_78994360_G_A_cs_1	1418	0.154138821396485	5.57234567869912	1	F45	PEER	integrated	CL_0000236_naive	chr1	4.2048147844134e-08	0.415771769284978	1	1.02040816326531e-09	5	45	991	FALSE	FALSE	0.0932622887586085	0.0932622887586085	78998257	rs35100942
chr1_78994360_G_A	F45_PEER_integrated	chr1_78999489_C_A	chr1_78994360_G_A	F45_PEER_integrated_CL_0000236_naive_chr1_78994360_G_A_cs_1	1420	0.0717254230955914	5.42093434505338	1	F45	PEER	integrated	CL_0000236_naive	chr1	4.2048147844134e-08	0.415771769284978	1	1.02040816326531e-09	5	45	991	FALSE	FALSE	0.0932622887586085	0.0932622887586085	78999489	rs1412732
chr1_80742792_T_C	MEplum1_WGCNA_separate_CL_0002057_LPS_2h	chr1_80742195_G_A	chr1_80742792_T_C	MEplum1_WGCNA_separate_CL_0002057_LPS_2h_chr1_80742792_T_C_cs_1	1266	0.123345893781906	5.49325820016429	1	MEplum1	WGCNA	separate	CL_0002057_LPS_2h	chr1	1.70298986030233e-08	0.0137255434686655	0.274265857944519	1.28205128205128e-09	16	296	24	FALSE	FALSE	8.91197110829671e-24	8.91197110829671e-24	80742195	rs1774870
chr1_80742792_T_C	MEplum1_WGCNA_separate_CL_0002057_LPS_2h	chr1_80742792_T_C	chr1_80742792_T_C	MEplum1_WGCNA_separate_CL_0002057_LPS_2h_chr1_80742792_T_C_cs_1	1268	0.866632313841212	5.9328581776083	1	MEplum1	WGCNA	separate	CL_0002057_LPS_2h	chr1	1.70298986030233e-08	0.0137255434686655	0.274265857944519	1.28205128205128e-09	16	296	24	FALSE	FALSE	8.91197110829671e-24	8.91197110829671e-24	80742792
chr1_8216449_T_C	X48.NIKOLSKY_BREAST_CANCER_7P15_AMPLICON_PLIER_integrated	chr1_8216449_T_C	chr1_8216449_T_C	X48.NIKOLSKY_BREAST_CANCER_7P15_AMPLICON_PLIER_integrated_CL_0000236_naive_chr1_8216449_T_C_cs_1	1276	0.310325449816493	5.64521978578716	1	X48.NIKOLSKY_BREAST_CANCER_7P15_AMPLICON	PLIER	integrated	CL_0000236_naive	chr1	2.72629999052867e-08	0.874978757203078	1	5.68181818181818e-10	2	2	670	FALSE	FALSE	0.0013264527104531	0.0013264527104531	8216449	rs402660
chr1_8216449_T_C	X48.NIKOLSKY_BREAST_CANCER_7P15_AMPLICON_PLIER_integrated	chr1_8216596_C_T	chr1_8216449_T_C	X48.NIKOLSKY_BREAST_CANCER_7P15_AMPLICON_PLIER_integrated_CL_0000236_naive_chr1_8216449_T_C_cs_1	1277	0.310325449816493	5.64521978578716	1	X48.NIKOLSKY_BREAST_CANCER_7P15_AMPLICON	PLIER	integrated	CL_0000236_naive	chr1	2.72629999052867e-08	0.874978757203078	1	5.68181818181818e-10	2	2	670	FALSE	FALSE	0.0013264527104531	0.0013264527104531	8216596	rs384055
chr1_8216449_T_C	X48.NIKOLSKY_BREAST_CANCER_7P15_AMPLICON_PLIER_integrated	chr1_8216849_A_G	chr1_8216449_T_C	X48.NIKOLSKY_BREAST_CANCER_7P15_AMPLICON_PLIER_integrated_CL_0000236_naive_chr1_8216449_T_C_cs_1	1278	0.310325449816493	5.64521978578716	1	X48.NIKOLSKY_BREAST_CANCER_7P15_AMPLICON	PLIER	integrated	CL_0000236_naive	chr1	2.72629999052867e-08	0.874978757203078	1	5.68181818181818e-10	2	2	670	FALSE	FALSE	0.0013264527104531	0.0013264527104531	8216849	rs478128
chr1_8216449_T_C	X48.NIKOLSKY_BREAST_CANCER_7P15_AMPLICON_PLIER_integrated	chr1_8218994_C_A	chr1_8216449_T_C	X48.NIKOLSKY_BREAST_CANCER_7P15_AMPLICON_PLIER_integrated_CL_0000236_naive_chr1_8216449_T_C_cs_1	1286	0.0050881260692095	4.46478137240804	1	X48.NIKOLSKY_BREAST_CANCER_7P15_AMPLICON	PLIER	integrated	CL_0000236_naive	chr1	2.72629999052867e-08	0.874978757203078	1	5.68181818181818e-10	2	2	670	FALSE	FALSE	0.0013264527104531	0.0013264527104531	8218994	rs72635726
chr1_8216449_T_C	X48.NIKOLSKY_BREAST_CANCER_7P15_AMPLICON_PLIER_integrated	chr1_8219030_G_A	chr1_8216449_T_C	X48.NIKOLSKY_BREAST_CANCER_7P15_AMPLICON_PLIER_integrated_CL_0000236_naive_chr1_8216449_T_C_cs_1	1287	0.0050881260692095	4.46478137240804	1	X48.NIKOLSKY_BREAST_CANCER_7P15_AMPLICON	PLIER	integrated	CL_0000236_naive	chr1	2.72629999052867e-08	0.874978757203078	1	5.68181818181818e-10	2	2	670	FALSE	FALSE	0.0013264527104531	0.0013264527104531	8219030	rs12143970
chr1_8216449_T_C	X48.NIKOLSKY_BREAST_CANCER_7P15_AMPLICON_PLIER_integrated	chr1_8219062_G_T	chr1_8216449_T_C	X48.NIKOLSKY_BREAST_CANCER_7P15_AMPLICON_PLIER_integrated_CL_0000236_naive_chr1_8216449_T_C_cs_1	1288	0.0050881260692095	4.46478137240804	1	X48.NIKOLSKY_BREAST_CANCER_7P15_AMPLICON	PLIER	integrated	CL_0000236_naive	chr1	2.72629999052867e-08	0.874978757203078	1	5.68181818181818e-10	2	2	670	FALSE	FALSE	0.0013264527104531	0.0013264527104531	8219062	rs12143975
chr1_8216449_T_C	X48.NIKOLSKY_BREAST_CANCER_7P15_AMPLICON_PLIER_integrated	chr1_8219076_G_A	chr1_8216449_T_C	X48.NIKOLSKY_BREAST_CANCER_7P15_AMPLICON_PLIER_integrated_CL_0000236_naive_chr1_8216449_T_C_cs_1	1289	0.0050881260692095	4.46478137240804	1	X48.NIKOLSKY_BREAST_CANCER_7P15_AMPLICON	PLIER	integrated	CL_0000236_naive	chr1	2.72629999052867e-08	0.874978757203078	1	5.68181818181818e-10	2	2	670	FALSE	FALSE	0.0013264527104531	0.0013264527104531	8219076	rs12143976
chr1_8216449_T_C	X48.NIKOLSKY_BREAST_CANCER_7P15_AMPLICON_PLIER_integrated	chr1_8219557_A_T	chr1_8216449_T_C	X48.NIKOLSKY_BREAST_CANCER_7P15_AMPLICON_PLIER_integrated_CL_0000236_naive_chr1_8216449_T_C_cs_1	1294	0.0050881260692095	4.46478137240804	1	X48.NIKOLSKY_BREAST_CANCER_7P15_AMPLICON	PLIER	integrated	CL_0000236_naive	chr1	2.72629999052867e-08	0.874978757203078	1	5.68181818181818e-10	2	2	670	FALSE	FALSE	0.0013264527104531	0.0013264527104531	8219557	rs653660
chr1_8216449_T_C	X48.NIKOLSKY_BREAST_CANCER_7P15_AMPLICON_PLIER_integrated	chr1_8219671_G_C	chr1_8216449_T_C	X48.NIKOLSKY_BREAST_CANCER_7P15_AMPLICON_PLIER_integrated_CL_0000236_naive_chr1_8216449_T_C_cs_1	1295	0.0050881260692095	4.46478137240804	1	X48.NIKOLSKY_BREAST_CANCER_7P15_AMPLICON	PLIER	integrated	CL_0000236_naive	chr1	2.72629999052867e-08	0.874978757203078	1	5.68181818181818e-10	2	2	670	FALSE	FALSE	0.0013264527104531	0.0013264527104531	8219671
chr1_8216449_T_C	X48.NIKOLSKY_BREAST_CANCER_7P15_AMPLICON_PLIER_integrated	chr1_8219676_G_A	chr1_8216449_T_C	X48.NIKOLSKY_BREAST_CANCER_7P15_AMPLICON_PLIER_integrated_CL_0000236_naive_chr1_8216449_T_C_cs_1	1296	0.0050881260692095	4.46478137240804	1	X48.NIKOLSKY_BREAST_CANCER_7P15_AMPLICON	PLIER	integrated	CL_0000236_naive	chr1	2.72629999052867e-08	0.874978757203078	1	5.68181818181818e-10	2	2	670	FALSE	FALSE	0.0013264527104531	0.0013264527104531	8219676	rs497887
chr1_8216449_T_C	X48.NIKOLSKY_BREAST_CANCER_7P15_AMPLICON_PLIER_integrated	chr1_8219712_G_A	chr1_8216449_T_C	X48.NIKOLSKY_BREAST_CANCER_7P15_AMPLICON_PLIER_integrated_CL_0000236_naive_chr1_8216449_T_C_cs_1	1297	0.0050881260692095	4.46478137240804	1	X48.NIKOLSKY_BREAST_CANCER_7P15_AMPLICON	PLIER	integrated	CL_0000236_naive	chr1	2.72629999052867e-08	0.874978757203078	1	5.68181818181818e-10	2	2	670	FALSE	FALSE	0.0013264527104531	0.0013264527104531	8219712	rs653837
chr1_8216449_T_C	X48.NIKOLSKY_BREAST_CANCER_7P15_AMPLICON_PLIER_integrated	chr1_8220035_C_T	chr1_8216449_T_C	X48.NIKOLSKY_BREAST_CANCER_7P15_AMPLICON_PLIER_integrated_CL_0000236_naive_chr1_8216449_T_C_cs_1	1300	0.0050881260692095	4.46478137240804	1	X48.NIKOLSKY_BREAST_CANCER_7P15_AMPLICON	PLIER	integrated	CL_0000236_naive	chr1	2.72629999052867e-08	0.874978757203078	1	5.68181818181818e-10	2	2	670	FALSE	FALSE	0.0013264527104531	0.0013264527104531	8220035	rs2004504
chr1_8216449_T_C	X48.NIKOLSKY_BREAST_CANCER_7P15_AMPLICON_PLIER_integrated	chr1_8220364_C_G	chr1_8216449_T_C	X48.NIKOLSKY_BREAST_CANCER_7P15_AMPLICON_PLIER_integrated_CL_0000236_naive_chr1_8216449_T_C_cs_1	1305	0.0050881260692095	4.46478137240804	1	X48.NIKOLSKY_BREAST_CANCER_7P15_AMPLICON	PLIER	integrated	CL_0000236_naive	chr1	2.72629999052867e-08	0.874978757203078	1	5.68181818181818e-10	2	2	670	FALSE	FALSE	0.0013264527104531	0.0013264527104531	8220364	rs10864338
chr1_8216449_T_C	X48.NIKOLSKY_BREAST_CANCER_7P15_AMPLICON_PLIER_integrated	chr1_8220436_C_T	chr1_8216449_T_C	X48.NIKOLSKY_BREAST_CANCER_7P15_AMPLICON_PLIER_integrated_CL_0000236_naive_chr1_8216449_T_C_cs_1	1306	0.0050881260692095	4.46478137240804	1	X48.NIKOLSKY_BREAST_CANCER_7P15_AMPLICON	PLIER	integrated	CL_0000236_naive	chr1	2.72629999052867e-08	0.874978757203078	1	5.68181818181818e-10	2	2	670	FALSE	FALSE	0.0013264527104531	0.0013264527104531	8220436	rs10864339
chr1_8216449_T_C	X48.NIKOLSKY_BREAST_CANCER_7P15_AMPLICON_PLIER_integrated	chr1_8220457_C_T	chr1_8216449_T_C	X48.NIKOLSKY_BREAST_CANCER_7P15_AMPLICON_PLIER_integrated_CL_0000236_naive_chr1_8216449_T_C_cs_1	1307	0.0050881260692095	4.46478137240804	1	X48.NIKOLSKY_BREAST_CANCER_7P15_AMPLICON	PLIER	integrated	CL_0000236_naive	chr1	2.72629999052867e-08	0.874978757203078	1	5.68181818181818e-10	2	2	670	FALSE	FALSE	0.0013264527104531	0.0013264527104531	8220457	rs10864340
chr1_8216449_T_C	X48.NIKOLSKY_BREAST_CANCER_7P15_AMPLICON_PLIER_integrated	chr1_8220650_G_A	chr1_8216449_T_C	X48.NIKOLSKY_BREAST_CANCER_7P15_AMPLICON_PLIER_integrated_CL_0000236_naive_chr1_8216449_T_C_cs_1	1308	0.0050881260692095	4.46478137240804	1	X48.NIKOLSKY_BREAST_CANCER_7P15_AMPLICON	PLIER	integrated	CL_0000236_naive	chr1	2.72629999052867e-08	0.874978757203078	1	5.68181818181818e-10	2	2	670	FALSE	FALSE	0.0013264527104531	0.0013264527104531	8220650	rs373906
chr1_8216449_T_C	X48.NIKOLSKY_BREAST_CANCER_7P15_AMPLICON_PLIER_integrated	chr1_8220706_G_A	chr1_8216449_T_C	X48.NIKOLSKY_BREAST_CANCER_7P15_AMPLICON_PLIER_integrated_CL_0000236_naive_chr1_8216449_T_C_cs_1	1309	0.0050881260692095	4.46478137240804	1	X48.NIKOLSKY_BREAST_CANCER_7P15_AMPLICON	PLIER	integrated	CL_0000236_naive	chr1	2.72629999052867e-08	0.874978757203078	1	5.68181818181818e-10	2	2	670	FALSE	FALSE	0.0013264527104531	0.0013264527104531	8220706	rs412616
chr1_8216449_T_C	X48.NIKOLSKY_BREAST_CANCER_7P15_AMPLICON_PLIER_integrated	chr1_8220992_G_A	chr1_8216449_T_C	X48.NIKOLSKY_BREAST_CANCER_7P15_AMPLICON_PLIER_integrated_CL_0000236_naive_chr1_8216449_T_C_cs_1	1312	0.0050881260692095	4.46478137240804	1	X48.NIKOLSKY_BREAST_CANCER_7P15_AMPLICON	PLIER	integrated	CL_0000236_naive	chr1	2.72629999052867e-08	0.874978757203078	1	5.68181818181818e-10	2	2	670	FALSE	FALSE	0.0013264527104531	0.0013264527104531	8220992	rs67812240
chr1_8216449_T_C	X48.NIKOLSKY_BREAST_CANCER_7P15_AMPLICON_PLIER_integrated	chr1_8221011_G_A	chr1_8216449_T_C	X48.NIKOLSKY_BREAST_CANCER_7P15_AMPLICON_PLIER_integrated_CL_0000236_naive_chr1_8216449_T_C_cs_1	1313	0.0050881260692095	4.46478137240804	1	X48.NIKOLSKY_BREAST_CANCER_7P15_AMPLICON	PLIER	integrated	CL_0000236_naive	chr1	2.72629999052867e-08	0.874978757203078	1	5.68181818181818e-10	2	2	670	FALSE	FALSE	0.0013264527104531	0.0013264527104531	8221011	rs637566
chr1_8216449_T_C	X48.NIKOLSKY_BREAST_CANCER_7P15_AMPLICON_PLIER_integrated	chr1_8221147_C_G	chr1_8216449_T_C	X48.NIKOLSKY_BREAST_CANCER_7P15_AMPLICON_PLIER_integrated_CL_0000236_naive_chr1_8216449_T_C_cs_1	1314	0.0050881260692095	4.46478137240804	1	X48.NIKOLSKY_BREAST_CANCER_7P15_AMPLICON	PLIER	integrated	CL_0000236_naive	chr1	2.72629999052867e-08	0.874978757203078	1	5.68181818181818e-10	2	2	670	FALSE	FALSE	0.0013264527104531	0.0013264527104531	8221147
chr1_8216449_T_C	X48.NIKOLSKY_BREAST_CANCER_7P15_AMPLICON_PLIER_integrated	chr1_8221266_T_C	chr1_8216449_T_C	X48.NIKOLSKY_BREAST_CANCER_7P15_AMPLICON_PLIER_integrated_CL_0000236_naive_chr1_8216449_T_C_cs_1	1315	0.0050881260692095	4.46478137240804	1	X48.NIKOLSKY_BREAST_CANCER_7P15_AMPLICON	PLIER	integrated	CL_0000236_naive	chr1	2.72629999052867e-08	0.874978757203078	1	5.68181818181818e-10	2	2	670	FALSE	FALSE	0.0013264527104531	0.0013264527104531	8221266	rs411619
chr1_8216449_T_C	X48.NIKOLSKY_BREAST_CANCER_7P15_AMPLICON_PLIER_integrated	chr1_8221318_G_GCC	chr1_8216449_T_C	X48.NIKOLSKY_BREAST_CANCER_7P15_AMPLICON_PLIER_integrated_CL_0000236_naive_chr1_8216449_T_C_cs_1	1316	0.0050881260692095	4.46478137240804	1	X48.NIKOLSKY_BREAST_CANCER_7P15_AMPLICON	PLIER	integrated	CL_0000236_naive	chr1	2.72629999052867e-08	0.874978757203078	1	5.68181818181818e-10	2	2	670	FALSE	FALSE	0.0013264527104531	0.0013264527104531	8221318	rs35833327
chr1_8216449_T_C	X48.NIKOLSKY_BREAST_CANCER_7P15_AMPLICON_PLIER_integrated	chr1_8221359_A_C	chr1_8216449_T_C	X48.NIKOLSKY_BREAST_CANCER_7P15_AMPLICON_PLIER_integrated_CL_0000236_naive_chr1_8216449_T_C_cs_1	1317	0.0050881260692095	4.46478137240804	1	X48.NIKOLSKY_BREAST_CANCER_7P15_AMPLICON	PLIER	integrated	CL_0000236_naive	chr1	2.72629999052867e-08	0.874978757203078	1	5.68181818181818e-10	2	2	670	FALSE	FALSE	0.0013264527104531	0.0013264527104531	8221359	rs405488
chr1_8216449_T_C	X48.NIKOLSKY_BREAST_CANCER_7P15_AMPLICON_PLIER_integrated	chr1_8221370_A_ATTTTTTT	chr1_8216449_T_C	X48.NIKOLSKY_BREAST_CANCER_7P15_AMPLICON_PLIER_integrated_CL_0000236_naive_chr1_8216449_T_C_cs_1	1318	0.0050881260692095	4.46478137240804	1	X48.NIKOLSKY_BREAST_CANCER_7P15_AMPLICON	PLIER	integrated	CL_0000236_naive	chr1	2.72629999052867e-08	0.874978757203078	1	5.68181818181818e-10	2	2	670	FALSE	FALSE	0.0013264527104531	0.0013264527104531	8221370
chr1_8216449_T_C	X48.NIKOLSKY_BREAST_CANCER_7P15_AMPLICON_PLIER_integrated	chr1_8221445_TC_T	chr1_8216449_T_C	X48.NIKOLSKY_BREAST_CANCER_7P15_AMPLICON_PLIER_integrated_CL_0000236_naive_chr1_8216449_T_C_cs_1	1319	0.0050881260692095	4.46478137240804	1	X48.NIKOLSKY_BREAST_CANCER_7P15_AMPLICON	PLIER	integrated	CL_0000236_naive	chr1	2.72629999052867e-08	0.874978757203078	1	5.68181818181818e-10	2	2	670	FALSE	FALSE	0.0013264527104531	0.0013264527104531	8221445	rs139289571
chr1_9273214_G_T	MEcyan_WGCNA_separate_CL_0000624_naive	chr1_9271893_A_G	chr1_9273214_G_T	MEcyan_WGCNA_separate_CL_0000624_naive_chr1_9273214_G_T_cs_1	1359	0.0946631390797292	-5.5603532920784	1	MEcyan	WGCNA	separate	CL_0000624_naive	chr1	1.25489445969923e-08	0.173459031736471	1	9.61538461538462e-10	117	1232	150	FALSE	FALSE	4.76395977597813e-108	4.76395977597813e-108	9271893
chr1_9273214_G_T	MEcyan_WGCNA_separate_CL_0000624_naive	chr1_9273214_G_T	chr1_9273214_G_T	MEcyan_WGCNA_separate_CL_0000624_naive_chr1_9273214_G_T_cs_1	1366	0.234886615351159	-5.74499931355394	1	MEcyan	WGCNA	separate	CL_0000624_naive	chr1	1.25489445969923e-08	0.173459031736471	1	9.61538461538462e-10	117	1232	150	FALSE	FALSE	4.76395977597813e-108	4.76395977597813e-108	9273214	rs916383
chr1_9273214_G_T	MEcyan_WGCNA_separate_CL_0000624_naive	chr1_9273289_C_T	chr1_9273214_G_T	MEcyan_WGCNA_separate_CL_0000624_naive_chr1_9273214_G_T_cs_1	1367	0.234886615351159	-5.74499931355394	1	MEcyan	WGCNA	separate	CL_0000624_naive	chr1	1.25489445969923e-08	0.173459031736471	1	9.61538461538462e-10	117	1232	150	FALSE	FALSE	4.76395977597813e-108	4.76395977597813e-108	9273289	rs916382
chr1_9273214_G_T	MEcyan_WGCNA_separate_CL_0000624_naive	chr1_9274272_C_A	chr1_9273214_G_T	MEcyan_WGCNA_separate_CL_0000624_naive_chr1_9273214_G_T_cs_1	1378	0.0946631390797292	-5.5603532920784	1	MEcyan	WGCNA	separate	CL_0000624_naive	chr1	1.25489445969923e-08	0.173459031736471	1	9.61538461538462e-10	117	1232	150	FALSE	FALSE	4.76395977597813e-108	4.76395977597813e-108	9274272
chr1_9273214_G_T	MEcyan_WGCNA_separate_CL_0000624_naive	chr1_9274302_G_A	chr1_9273214_G_T	MEcyan_WGCNA_separate_CL_0000624_naive_chr1_9273214_G_T_cs_1	1379	0.0946631390797292	-5.5603532920784	1	MEcyan	WGCNA	separate	CL_0000624_naive	chr1	1.25489445969923e-08	0.173459031736471	1	9.61538461538462e-10	117	1232	150	FALSE	FALSE	4.76395977597813e-108	4.76395977597813e-108	9274302	rs2311048
chr1_9273214_G_T	MEcyan_WGCNA_separate_CL_0000624_naive	chr1_9274769_T_C	chr1_9273214_G_T	MEcyan_WGCNA_separate_CL_0000624_naive_chr1_9273214_G_T_cs_1	1385	0.0697575750802831	-5.49718827581144	1	MEcyan	WGCNA	separate	CL_0000624_naive	chr1	1.25489445969923e-08	0.173459031736471	1	9.61538461538462e-10	117	1232	150	FALSE	FALSE	4.76395977597813e-108	4.76395977597813e-108	9274769	rs72641828
chr1_9273214_G_T	MEcyan_WGCNA_separate_CL_0000624_naive	chr1_9276592_T_C	chr1_9273214_G_T	MEcyan_WGCNA_separate_CL_0000624_naive_chr1_9273214_G_T_cs_1	1399	0.0697575750802831	-5.49718827581144	1	MEcyan	WGCNA	separate	CL_0000624_naive	chr1	1.25489445969923e-08	0.173459031736471	1	9.61538461538462e-10	117	1232	150	FALSE	FALSE	4.76395977597813e-108	4.76395977597813e-108	9276592
chr1_9273214_G_T	MEcyan_WGCNA_separate_CL_0000624_naive	chr1_9276713_A_G	chr1_9273214_G_T	MEcyan_WGCNA_separate_CL_0000624_naive_chr1_9273214_G_T_cs_1	1404	0.0331775843445564	-5.29977187534002	1	MEcyan	WGCNA	separate	CL_0000624_naive	chr1	1.25489445969923e-08	0.173459031736471	1	9.61538461538462e-10	117	1232	150	FALSE	FALSE	4.76395977597813e-108	4.76395977597813e-108	9276713	rs763181
chr1_9273214_G_T	MEcyan_WGCNA_separate_CL_0000624_naive	chr1_9277136_ATTTTG_A	chr1_9273214_G_T	MEcyan_WGCNA_separate_CL_0000624_naive_chr1_9273214_G_T_cs_1	1406	0.0480581694533122	-5.41435381810856	1	MEcyan	WGCNA	separate	CL_0000624_naive	chr1	1.25489445969923e-08	0.173459031736471	1	9.61538461538462e-10	117	1232	150	FALSE	FALSE	4.76395977597813e-108	4.76395977597813e-108	9277136	rs113111563; rs139415304; rs528604238
chr1_97406289_T_A	MEtan_WGCNA_integrated	chr1_97336616_G_A	chr1_97406289_T_A	MEtan_WGCNA_integrated_CL_0002057_LPS_2h_chr1_97406289_T_A_cs_1	847	0.0125171919126755	4.9598498140765	1	MEtan	WGCNA	integrated	CL_0002057_LPS_2h	chr1	3.74699599803286e-08	0.0569670197852625	1	1e-09	17	185	268	FALSE	FALSE	1.88166136129568e-09	1.88166136129568e-09	97336616	rs117967363
chr1_97406289_T_A	MEtan_WGCNA_integrated	chr1_97340556_C_A	chr1_97406289_T_A	MEtan_WGCNA_integrated_CL_0002057_LPS_2h_chr1_97406289_T_A_cs_1	854	0.0125171919126755	4.9598498140765	1	MEtan	WGCNA	integrated	CL_0002057_LPS_2h	chr1	3.74699599803286e-08	0.0569670197852625	1	1e-09	17	185	268	FALSE	FALSE	1.88166136129568e-09	1.88166136129568e-09	97340556	rs115262804
chr1_97406289_T_A	MEtan_WGCNA_integrated	chr1_97340662_T_C	chr1_97406289_T_A	MEtan_WGCNA_integrated_CL_0002057_LPS_2h_chr1_97406289_T_A_cs_1	856	0.0125171919126755	4.9598498140765	1	MEtan	WGCNA	integrated	CL_0002057_LPS_2h	chr1	3.74699599803286e-08	0.0569670197852625	1	1e-09	17	185	268	FALSE	FALSE	1.88166136129568e-09	1.88166136129568e-09	97340662
chr1_97406289_T_A	MEtan_WGCNA_integrated	chr1_97340919_C_T	chr1_97406289_T_A	MEtan_WGCNA_integrated_CL_0002057_LPS_2h_chr1_97406289_T_A_cs_1	857	0.0125171919126755	4.9598498140765	1	MEtan	WGCNA	integrated	CL_0002057_LPS_2h	chr1	3.74699599803286e-08	0.0569670197852625	1	1e-09	17	185	268	FALSE	FALSE	1.88166136129568e-09	1.88166136129568e-09	97340919	rs74682146
chr1_97406289_T_A	MEtan_WGCNA_integrated	chr1_97346845_C_T	chr1_97406289_T_A	MEtan_WGCNA_integrated_CL_0002057_LPS_2h_chr1_97406289_T_A_cs_1	866	0.0125171919126755	4.9598498140765	1	MEtan	WGCNA	integrated	CL_0002057_LPS_2h	chr1	3.74699599803286e-08	0.0569670197852625	1	1e-09	17	185	268	FALSE	FALSE	1.88166136129568e-09	1.88166136129568e-09	97346845	rs78987067
chr1_97406289_T_A	MEtan_WGCNA_integrated	chr1_97347542_T_G	chr1_97406289_T_A	MEtan_WGCNA_integrated_CL_0002057_LPS_2h_chr1_97406289_T_A_cs_1	868	0.0125171919126755	4.9598498140765	1	MEtan	WGCNA	integrated	CL_0002057_LPS_2h	chr1	3.74699599803286e-08	0.0569670197852625	1	1e-09	17	185	268	FALSE	FALSE	1.88166136129568e-09	1.88166136129568e-09	97347542	rs75932131
chr1_97406289_T_A	MEtan_WGCNA_integrated	chr1_97377834_G_A	chr1_97406289_T_A	MEtan_WGCNA_integrated_CL_0002057_LPS_2h_chr1_97406289_T_A_cs_1	947	0.0236786896536113	5.14620318661221	1	MEtan	WGCNA	integrated	CL_0002057_LPS_2h	chr1	3.74699599803286e-08	0.0569670197852625	1	1e-09	17	185	268	FALSE	FALSE	1.88166136129568e-09	1.88166136129568e-09	97377834	rs74105139
chr1_97406289_T_A	MEtan_WGCNA_integrated	chr1_97383769_C_T	chr1_97406289_T_A	MEtan_WGCNA_integrated_CL_0002057_LPS_2h_chr1_97406289_T_A_cs_1	970	0.0236786896536113	5.14620318661221	1	MEtan	WGCNA	integrated	CL_0002057_LPS_2h	chr1	3.74699599803286e-08	0.0569670197852625	1	1e-09	17	185	268	FALSE	FALSE	1.88166136129568e-09	1.88166136129568e-09	97383769	rs11165854
chr1_97406289_T_A	MEtan_WGCNA_integrated	chr1_97385538_A_C	chr1_97406289_T_A	MEtan_WGCNA_integrated_CL_0002057_LPS_2h_chr1_97406289_T_A_cs_1	984	0.0236786896536113	5.14620318661221	1	MEtan	WGCNA	integrated	CL_0002057_LPS_2h	chr1	3.74699599803286e-08	0.0569670197852625	1	1e-09	17	185	268	FALSE	FALSE	1.88166136129568e-09	1.88166136129568e-09	97385538	rs4638160
chr1_97406289_T_A	MEtan_WGCNA_integrated	chr1_97389310_G_GA	chr1_97406289_T_A	MEtan_WGCNA_integrated_CL_0002057_LPS_2h_chr1_97406289_T_A_cs_1	1002	0.0236786896536113	5.14620318661221	1	MEtan	WGCNA	integrated	CL_0002057_LPS_2h	chr1	3.74699599803286e-08	0.0569670197852625	1	1e-09	17	185	268	FALSE	FALSE	1.88166136129568e-09	1.88166136129568e-09	97389310
chr1_97406289_T_A	MEtan_WGCNA_integrated	chr1_97393818_C_G	chr1_97406289_T_A	MEtan_WGCNA_integrated_CL_0002057_LPS_2h_chr1_97406289_T_A_cs_1	1037	0.0236786896536113	5.14620318661221	1	MEtan	WGCNA	integrated	CL_0002057_LPS_2h	chr1	3.74699599803286e-08	0.0569670197852625	1	1e-09	17	185	268	FALSE	FALSE	1.88166136129568e-09	1.88166136129568e-09	97393818	rs149216568
chr1_97406289_T_A	MEtan_WGCNA_integrated	chr1_97393819_A_G	chr1_97406289_T_A	MEtan_WGCNA_integrated_CL_0002057_LPS_2h_chr1_97406289_T_A_cs_1	1038	0.0236786896536113	5.14620318661221	1	MEtan	WGCNA	integrated	CL_0002057_LPS_2h	chr1	3.74699599803286e-08	0.0569670197852625	1	1e-09	17	185	268	FALSE	FALSE	1.88166136129568e-09	1.88166136129568e-09	97393819	rs183554993
chr1_97406289_T_A	MEtan_WGCNA_integrated	chr1_97397702_C_T	chr1_97406289_T_A	MEtan_WGCNA_integrated_CL_0002057_LPS_2h_chr1_97406289_T_A_cs_1	1061	0.0236786896536113	5.14620318661221	1	MEtan	WGCNA	integrated	CL_0002057_LPS_2h	chr1	3.74699599803286e-08	0.0569670197852625	1	1e-09	17	185	268	FALSE	FALSE	1.88166136129568e-09	1.88166136129568e-09	97397702	rs76012985
chr1_97406289_T_A	MEtan_WGCNA_integrated	chr1_97398460_T_C	chr1_97406289_T_A	MEtan_WGCNA_integrated_CL_0002057_LPS_2h_chr1_97406289_T_A_cs_1	1066	0.0236786896536113	5.14620318661221	1	MEtan	WGCNA	integrated	CL_0002057_LPS_2h	chr1	3.74699599803286e-08	0.0569670197852625	1	1e-09	17	185	268	FALSE	FALSE	1.88166136129568e-09	1.88166136129568e-09	97398460	rs148185926
chr1_97406289_T_A	MEtan_WGCNA_integrated	chr1_97406289_T_A	chr1_97406289_T_A	MEtan_WGCNA_integrated_CL_0002057_LPS_2h_chr1_97406289_T_A_cs_1	1102	0.740455384684554	5.84486490982908	1	MEtan	WGCNA	integrated	CL_0002057_LPS_2h	chr1	3.74699599803286e-08	0.0569670197852625	1	1e-09	17	185	268	FALSE	FALSE	1.88166136129568e-09	1.88166136129568e-09	97406289	rs201629458
chr1_97406289_T_A	MEtan_WGCNA_integrated	chr1_97411609_T_C	chr1_97406289_T_A	MEtan_WGCNA_integrated_CL_0002057_LPS_2h_chr1_97406289_T_A_cs_1	1129	0.0236786896536113	5.14620318661221	1	MEtan	WGCNA	integrated	CL_0002057_LPS_2h	chr1	3.74699599803286e-08	0.0569670197852625	1	1e-09	17	185	268	FALSE	FALSE	1.88166136129568e-09	1.88166136129568e-09	97411609	rs79593470
chr10_113154982_AT_A	X35.GSE34205_RSV_VS_FLU_INF_INFANT_PBMC_UP_PLIER_integrated	chr10_113154982_AT_A	chr10_113154982_AT_A	X35.GSE34205_RSV_VS_FLU_INF_INFANT_PBMC_UP_PLIER_integrated_CL_0000624_naive_chr10_113154982_AT_A_cs_1	906	0.998711695854892	5.4743785298926	1	X35.GSE34205_RSV_VS_FLU_INF_INFANT_PBMC_UP	PLIER	integrated	CL_0000624_naive	chr10	4.93599306797062e-08	0.677322497099164	1	5.68181818181818e-10	9	168	400	FALSE	FALSE	0.0114291523143924	0.0114291523143924	113154982	rs67268457; rs547862468; rs59885014
chr10_114375651_G_T	X80.NIKOLSKY_BREAST_CANCER_19Q13.1_AMPLICON_PLIER_integrated	chr10_114370571_C_T	chr10_114375651_G_T	X80.NIKOLSKY_BREAST_CANCER_19Q13.1_AMPLICON_PLIER_integrated_CL_0002057_IFNg_24h_chr10_114375651_G_T_cs_1	1112	0.0798640390248172	5.52950715733901	1	X80.NIKOLSKY_BREAST_CANCER_19Q13.1_AMPLICON	PLIER	integrated	CL_0002057_IFNg_24h	chr10	1.80382165268821e-08	0.0145019797714162	0.301582075033594	5.68181818181818e-10	69	618	743	FALSE	FALSE	1.60357637336608e-14	1.60357637336608e-14	114370571
chr10_114375651_G_T	X80.NIKOLSKY_BREAST_CANCER_19Q13.1_AMPLICON_PLIER_integrated	chr10_114371469_T_C	chr10_114375651_G_T	X80.NIKOLSKY_BREAST_CANCER_19Q13.1_AMPLICON_PLIER_integrated_CL_0002057_IFNg_24h_chr10_114375651_G_T_cs_1	1114	0.126825019944533	5.62137320047292	1	X80.NIKOLSKY_BREAST_CANCER_19Q13.1_AMPLICON	PLIER	integrated	CL_0002057_IFNg_24h	chr10	1.80382165268821e-08	0.0145019797714162	0.301582075033594	5.68181818181818e-10	69	618	743	FALSE	FALSE	1.60357637336608e-14	1.60357637336608e-14	114371469	rs12263086
chr10_114375651_G_T	X80.NIKOLSKY_BREAST_CANCER_19Q13.1_AMPLICON_PLIER_integrated	chr10_114372082_C_T	chr10_114375651_G_T	X80.NIKOLSKY_BREAST_CANCER_19Q13.1_AMPLICON_PLIER_integrated_CL_0002057_IFNg_24h_chr10_114375651_G_T_cs_1	1120	0.0798640390248172	5.52950715733901	1	X80.NIKOLSKY_BREAST_CANCER_19Q13.1_AMPLICON	PLIER	integrated	CL_0002057_IFNg_24h	chr10	1.80382165268821e-08	0.0145019797714162	0.301582075033594	5.68181818181818e-10	69	618	743	FALSE	FALSE	1.60357637336608e-14	1.60357637336608e-14	114372082
chr10_114375651_G_T	X80.NIKOLSKY_BREAST_CANCER_19Q13.1_AMPLICON_PLIER_integrated	chr10_114372414_G_T	chr10_114375651_G_T	X80.NIKOLSKY_BREAST_CANCER_19Q13.1_AMPLICON_PLIER_integrated_CL_0002057_IFNg_24h_chr10_114375651_G_T_cs_1	1122	0.0798640390248172	5.52950715733901	1	X80.NIKOLSKY_BREAST_CANCER_19Q13.1_AMPLICON	PLIER	integrated	CL_0002057_IFNg_24h	chr10	1.80382165268821e-08	0.0145019797714162	0.301582075033594	5.68181818181818e-10	69	618	743	FALSE	FALSE	1.60357637336608e-14	1.60357637336608e-14	114372414
chr10_114375651_G_T	X80.NIKOLSKY_BREAST_CANCER_19Q13.1_AMPLICON_PLIER_integrated	chr10_114372922_T_C	chr10_114375651_G_T	X80.NIKOLSKY_BREAST_CANCER_19Q13.1_AMPLICON_PLIER_integrated_CL_0002057_IFNg_24h_chr10_114375651_G_T_cs_1	1125	0.126825019944533	5.62137320047292	1	X80.NIKOLSKY_BREAST_CANCER_19Q13.1_AMPLICON	PLIER	integrated	CL_0002057_IFNg_24h	chr10	1.80382165268821e-08	0.0145019797714162	0.301582075033594	5.68181818181818e-10	69	618	743	FALSE	FALSE	1.60357637336608e-14	1.60357637336608e-14	114372922	rs7896823
chr10_114375651_G_T	X80.NIKOLSKY_BREAST_CANCER_19Q13.1_AMPLICON_PLIER_integrated	chr10_114373790_C_T	chr10_114375651_G_T	X80.NIKOLSKY_BREAST_CANCER_19Q13.1_AMPLICON_PLIER_integrated_CL_0002057_IFNg_24h_chr10_114375651_G_T_cs_1	1126	0.0798640390248172	5.52950715733901	1	X80.NIKOLSKY_BREAST_CANCER_19Q13.1_AMPLICON	PLIER	integrated	CL_0002057_IFNg_24h	chr10	1.80382165268821e-08	0.0145019797714162	0.301582075033594	5.68181818181818e-10	69	618	743	FALSE	FALSE	1.60357637336608e-14	1.60357637336608e-14	114373790	rs11196715
chr10_114375651_G_T	X80.NIKOLSKY_BREAST_CANCER_19Q13.1_AMPLICON_PLIER_integrated	chr10_114374306_A_G	chr10_114375651_G_T	X80.NIKOLSKY_BREAST_CANCER_19Q13.1_AMPLICON_PLIER_integrated_CL_0002057_IFNg_24h_chr10_114375651_G_T_cs_1	1127	0.0963676841767602	5.55972174568228	1	X80.NIKOLSKY_BREAST_CANCER_19Q13.1_AMPLICON	PLIER	integrated	CL_0002057_IFNg_24h	chr10	1.80382165268821e-08	0.0145019797714162	0.301582075033594	5.68181818181818e-10	69	618	743	FALSE	FALSE	1.60357637336608e-14	1.60357637336608e-14	114374306	rs11196716
chr10_114375651_G_T	X80.NIKOLSKY_BREAST_CANCER_19Q13.1_AMPLICON_PLIER_integrated	chr10_114375651_G_T	chr10_114375651_G_T	X80.NIKOLSKY_BREAST_CANCER_19Q13.1_AMPLICON_PLIER_integrated_CL_0002057_IFNg_24h_chr10_114375651_G_T_cs_1	1130	0.326279927757652	-5.80865965074669	1	X80.NIKOLSKY_BREAST_CANCER_19Q13.1_AMPLICON	PLIER	integrated	CL_0002057_IFNg_24h	chr10	1.80382165268821e-08	0.0145019797714162	0.301582075033594	5.68181818181818e-10	69	618	743	FALSE	FALSE	1.60357637336608e-14	1.60357637336608e-14	114375651	rs2475245
chr10_17991125_CTT_CTTTTT	IC22_ICA_separate_CL_0000624_naive	chr10_17991125_CTT_CTTTTT	chr10_17991125_CTT_CTTTTT	IC22_ICA_separate_CL_0000624_naive_chr10_17991125_CTT_CTTTTT_cs_1	1256	0.999621914931148	5.78745536482203	1	IC22	ICA	separate	CL_0000624_naive	chr10	1.03395766811154e-08	0.981685310263041	1	1.06382978723404e-09	22	310	965	FALSE	FALSE	0.0936367233033552	0.0936367233033552	17991125
chr10_1805351_CAAAA_C	F3_PEER_integrated	chr10_1805351_CAAAA_C	chr10_1805351_CAAAA_C	F3_PEER_integrated_CL_0002057_LPS_24h_chr10_1805351_CAAAA_C_cs_1	1948	0.998500663855171	-5.66487257485093	1	F3	PEER	integrated	CL_0002057_LPS_24h	chr10	2.95157997741986e-08	0.758452466439159	1	1.02040816326531e-09	1	8	1349	FALSE	FALSE	0.456562449371033	0.456562449371033	1805351	rs552966824; rs750981800; rs567752036
chr10_20391413_GA_G	IC31_ICA_integrated	chr10_20390544_C_T	chr10_20391413_GA_G	IC31_ICA_integrated_CL_0000233_naive_chr10_20391413_GA_G_cs_1	1955	0.00814324105081954	-5.413519292989	1	IC31	ICA	integrated	CL_0000233_naive	chr10	1.8937876619481e-08	0.779177621445833	1	2.94117647058824e-10	7	284	865	FALSE	FALSE	0.981887836784458	0.981887836784458	20390544
chr10_20391413_GA_G	IC31_ICA_integrated	chr10_20390835_T_C	chr10_20391413_GA_G	IC31_ICA_integrated_CL_0000233_naive_chr10_20391413_GA_G_cs_1	1958	0.00814324105081954	-5.413519292989	1	IC31	ICA	integrated	CL_0000233_naive	chr10	1.8937876619481e-08	0.779177621445833	1	2.94117647058824e-10	7	284	865	FALSE	FALSE	0.981887836784458	0.981887836784458	20390835	rs16920469
chr10_20391413_GA_G	IC31_ICA_integrated	chr10_20391310_G_T	chr10_20391413_GA_G	IC31_ICA_integrated_CL_0000233_naive_chr10_20391413_GA_G_cs_1	1963	0.00814324105081954	-5.413519292989	1	IC31	ICA	integrated	CL_0000233_naive	chr10	1.8937876619481e-08	0.779177621445833	1	2.94117647058824e-10	7	284	865	FALSE	FALSE	0.981887836784458	0.981887836784458	20391310	rs60931247
chr10_20391413_GA_G	IC31_ICA_integrated	chr10_20391413_GA_G	chr10_20391413_GA_G	IC31_ICA_integrated_CL_0000233_naive_chr10_20391413_GA_G_cs_1	1964	0.0790819816433236	-5.94730161947439	1	IC31	ICA	integrated	CL_0000233_naive	chr10	1.8937876619481e-08	0.779177621445833	1	2.94117647058824e-10	7	284	865	FALSE	FALSE	0.981887836784458	0.981887836784458	20391413	rs59926780; rs531051668; rs796885772
chr10_20391413_GA_G	IC31_ICA_integrated	chr10_20391988_G_C	chr10_20391413_GA_G	IC31_ICA_integrated_CL_0000233_naive_chr10_20391413_GA_G_cs_1	1967	0.00814324105081954	-5.413519292989	1	IC31	ICA	integrated	CL_0000233_naive	chr10	1.8937876619481e-08	0.779177621445833	1	2.94117647058824e-10	7	284	865	FALSE	FALSE	0.981887836784458	0.981887836784458	20391988	rs67133300
chr10_20391413_GA_G	IC31_ICA_integrated	chr10_20392195_T_C	chr10_20391413_GA_G	IC31_ICA_integrated_CL_0000233_naive_chr10_20391413_GA_G_cs_1	1968	0.00860567185476524	-5.37967834588685	1	IC31	ICA	integrated	CL_0000233_naive	chr10	1.8937876619481e-08	0.779177621445833	1	2.94117647058824e-10	7	284	865	FALSE	FALSE	0.981887836784458	0.981887836784458	20392195	rs58865541
chr10_20391413_GA_G	IC31_ICA_integrated	chr10_20392433_T_C	chr10_20391413_GA_G	IC31_ICA_integrated_CL_0000233_naive_chr10_20391413_GA_G_cs_1	1969	0.00814324105081954	-5.413519292989	1	IC31	ICA	integrated	CL_0000233_naive	chr10	1.8937876619481e-08	0.779177621445833	1	2.94117647058824e-10	7	284	865	FALSE	FALSE	0.981887836784458	0.981887836784458	20392433	rs57235654
chr10_20391413_GA_G	IC31_ICA_integrated	chr10_20392672_A_T	chr10_20391413_GA_G	IC31_ICA_integrated_CL_0000233_naive_chr10_20391413_GA_G_cs_1	1971	0.00814324105081954	-5.413519292989	1	IC31	ICA	integrated	CL_0000233_naive	chr10	1.8937876619481e-08	0.779177621445833	1	2.94117647058824e-10	7	284	865	FALSE	FALSE	0.981887836784458	0.981887836784458	20392672
chr10_20391413_GA_G	IC31_ICA_integrated	chr10_20392941_T_C	chr10_20391413_GA_G	IC31_ICA_integrated_CL_0000233_naive_chr10_20391413_GA_G_cs_1	1972	0.00692008683392065	-5.29990525163004	1	IC31	ICA	integrated	CL_0000233_naive	chr10	1.8937876619481e-08	0.779177621445833	1	2.94117647058824e-10	7	284	865	FALSE	FALSE	0.981887836784458	0.981887836784458	20392941	rs68132210
chr10_20391413_GA_G	IC31_ICA_integrated	chr10_20394509_G_C	chr10_20391413_GA_G	IC31_ICA_integrated_CL_0000233_naive_chr10_20391413_GA_G_cs_1	1974	0.00648283657198412	-5.32923027570805	1	IC31	ICA	integrated	CL_0000233_naive	chr10	1.8937876619481e-08	0.779177621445833	1	2.94117647058824e-10	7	284	865	FALSE	FALSE	0.981887836784458	0.981887836784458	20394509
chr10_20391413_GA_G	IC31_ICA_integrated	chr10_20395395_C_T	chr10_20391413_GA_G	IC31_ICA_integrated_CL_0000233_naive_chr10_20391413_GA_G_cs_1	1976	0.00648283657198412	-5.32923027570805	1	IC31	ICA	integrated	CL_0000233_naive	chr10	1.8937876619481e-08	0.779177621445833	1	2.94117647058824e-10	7	284	865	FALSE	FALSE	0.981887836784458	0.981887836784458	20395395	rs7918915
chr10_20391413_GA_G	IC31_ICA_integrated	chr10_20398451_AAATT_A	chr10_20391413_GA_G	IC31_ICA_integrated_CL_0000233_naive_chr10_20391413_GA_G_cs_1	1980	0.00814324105081954	-5.413519292989	1	IC31	ICA	integrated	CL_0000233_naive	chr10	1.8937876619481e-08	0.779177621445833	1	2.94117647058824e-10	7	284	865	FALSE	FALSE	0.981887836784458	0.981887836784458	20398451	rs72227041; rs564964194
chr10_20391413_GA_G	IC31_ICA_integrated	chr10_20400975_A_T	chr10_20391413_GA_G	IC31_ICA_integrated_CL_0000233_naive_chr10_20391413_GA_G_cs_1	1987	0.00814324105081954	-5.413519292989	1	IC31	ICA	integrated	CL_0000233_naive	chr10	1.8937876619481e-08	0.779177621445833	1	2.94117647058824e-10	7	284	865	FALSE	FALSE	0.981887836784458	0.981887836784458	20400975	rs72798156
chr10_20391413_GA_G	IC31_ICA_integrated	chr10_20408196_G_A	chr10_20391413_GA_G	IC31_ICA_integrated_CL_0000233_naive_chr10_20391413_GA_G_cs_1	2000	0.00814324105081954	-5.413519292989	1	IC31	ICA	integrated	CL_0000233_naive	chr10	1.8937876619481e-08	0.779177621445833	1	2.94117647058824e-10	7	284	865	FALSE	FALSE	0.981887836784458	0.981887836784458	20408196	rs17710772
chr10_20391413_GA_G	IC31_ICA_integrated	chr10_20408522_T_C	chr10_20391413_GA_G	IC31_ICA_integrated_CL_0000233_naive_chr10_20391413_GA_G_cs_1	2001	0.00814324105081954	-5.413519292989	1	IC31	ICA	integrated	CL_0000233_naive	chr10	1.8937876619481e-08	0.779177621445833	1	2.94117647058824e-10	7	284	865	FALSE	FALSE	0.981887836784458	0.981887836784458	20408522	rs72798159
chr10_20391413_GA_G	IC31_ICA_integrated	chr10_20409017_CTGTT_C	chr10_20391413_GA_G	IC31_ICA_integrated_CL_0000233_naive_chr10_20391413_GA_G_cs_1	2003	0.00814324105081954	-5.413519292989	1	IC31	ICA	integrated	CL_0000233_naive	chr10	1.8937876619481e-08	0.779177621445833	1	2.94117647058824e-10	7	284	865	FALSE	FALSE	0.981887836784458	0.981887836784458	20409017	rs147944861; rs61444040
chr10_20391413_GA_G	IC31_ICA_integrated	chr10_20409341_T_A	chr10_20391413_GA_G	IC31_ICA_integrated_CL_0000233_naive_chr10_20391413_GA_G_cs_1	2004	0.00814324105081954	-5.413519292989	1	IC31	ICA	integrated	CL_0000233_naive	chr10	1.8937876619481e-08	0.779177621445833	1	2.94117647058824e-10	7	284	865	FALSE	FALSE	0.981887836784458	0.981887836784458	20409341
chr10_20391413_GA_G	IC31_ICA_integrated	chr10_20409352_A_G	chr10_20391413_GA_G	IC31_ICA_integrated_CL_0000233_naive_chr10_20391413_GA_G_cs_1	2005	0.00814324105081954	-5.413519292989	1	IC31	ICA	integrated	CL_0000233_naive	chr10	1.8937876619481e-08	0.779177621445833	1	2.94117647058824e-10	7	284	865	FALSE	FALSE	0.981887836784458	0.981887836784458	20409352	rs12570227
chr10_20391413_GA_G	IC31_ICA_integrated	chr10_20409435_C_T	chr10_20391413_GA_G	IC31_ICA_integrated_CL_0000233_naive_chr10_20391413_GA_G_cs_1	2006	0.00814324105081954	-5.413519292989	1	IC31	ICA	integrated	CL_0000233_naive	chr10	1.8937876619481e-08	0.779177621445833	1	2.94117647058824e-10	7	284	865	FALSE	FALSE	0.981887836784458	0.981887836784458	20409435	rs56060891
chr10_20391413_GA_G	IC31_ICA_integrated	chr10_20409589_C_T	chr10_20391413_GA_G	IC31_ICA_integrated_CL_0000233_naive_chr10_20391413_GA_G_cs_1	2007	0.00814324105081954	-5.413519292989	1	IC31	ICA	integrated	CL_0000233_naive	chr10	1.8937876619481e-08	0.779177621445833	1	2.94117647058824e-10	7	284	865	FALSE	FALSE	0.981887836784458	0.981887836784458	20409589
chr10_20391413_GA_G	IC31_ICA_integrated	chr10_20409644_C_CTCTT	chr10_20391413_GA_G	IC31_ICA_integrated_CL_0000233_naive_chr10_20391413_GA_G_cs_1	2008	0.00814324105081954	-5.413519292989	1	IC31	ICA	integrated	CL_0000233_naive	chr10	1.8937876619481e-08	0.779177621445833	1	2.94117647058824e-10	7	284	865	FALSE	FALSE	0.981887836784458	0.981887836784458	20409644	rs571417930; rs148099452
chr10_20391413_GA_G	IC31_ICA_integrated	chr10_20409675_G_A	chr10_20391413_GA_G	IC31_ICA_integrated_CL_0000233_naive_chr10_20391413_GA_G_cs_1	2009	0.00814324105081954	-5.413519292989	1	IC31	ICA	integrated	CL_0000233_naive	chr10	1.8937876619481e-08	0.779177621445833	1	2.94117647058824e-10	7	284	865	FALSE	FALSE	0.981887836784458	0.981887836784458	20409675
chr10_20391413_GA_G	IC31_ICA_integrated	chr10_20409799_T_C	chr10_20391413_GA_G	IC31_ICA_integrated_CL_0000233_naive_chr10_20391413_GA_G_cs_1	2011	0.00814324105081954	-5.413519292989	1	IC31	ICA	integrated	CL_0000233_naive	chr10	1.8937876619481e-08	0.779177621445833	1	2.94117647058824e-10	7	284	865	FALSE	FALSE	0.981887836784458	0.981887836784458	20409799	rs72789265
chr10_20391413_GA_G	IC31_ICA_integrated	chr10_20409875_T_C	chr10_20391413_GA_G	IC31_ICA_integrated_CL_0000233_naive_chr10_20391413_GA_G_cs_1	2012	0.00814324105081954	-5.413519292989	1	IC31	ICA	integrated	CL_0000233_naive	chr10	1.8937876619481e-08	0.779177621445833	1	2.94117647058824e-10	7	284	865	FALSE	FALSE	0.981887836784458	0.981887836784458	20409875	rs72789266
chr10_20391413_GA_G	IC31_ICA_integrated	chr10_20409955_AT_A	chr10_20391413_GA_G	IC31_ICA_integrated_CL_0000233_naive_chr10_20391413_GA_G_cs_1	2014	0.00814324105081954	-5.413519292989	1	IC31	ICA	integrated	CL_0000233_naive	chr10	1.8937876619481e-08	0.779177621445833	1	2.94117647058824e-10	7	284	865	FALSE	FALSE	0.981887836784458	0.981887836784458	20409955	rs138661715
chr10_20391413_GA_G	IC31_ICA_integrated	chr10_20410217_G_A	chr10_20391413_GA_G	IC31_ICA_integrated_CL_0000233_naive_chr10_20391413_GA_G_cs_1	2016	0.00814324105081954	-5.413519292989	1	IC31	ICA	integrated	CL_0000233_naive	chr10	1.8937876619481e-08	0.779177621445833	1	2.94117647058824e-10	7	284	865	FALSE	FALSE	0.981887836784458	0.981887836784458	20410217	rs10508624
chr10_20391413_GA_G	IC31_ICA_integrated	chr10_20410744_G_A	chr10_20391413_GA_G	IC31_ICA_integrated_CL_0000233_naive_chr10_20391413_GA_G_cs_1	2017	0.00814324105081954	-5.413519292989	1	IC31	ICA	integrated	CL_0000233_naive	chr10	1.8937876619481e-08	0.779177621445833	1	2.94117647058824e-10	7	284	865	FALSE	FALSE	0.981887836784458	0.981887836784458	20410744	rs16920489
chr10_20391413_GA_G	IC31_ICA_integrated	chr10_20411617_TAA_T	chr10_20391413_GA_G	IC31_ICA_integrated_CL_0000233_naive_chr10_20391413_GA_G_cs_1	2019	0.00814324105081954	-5.413519292989	1	IC31	ICA	integrated	CL_0000233_naive	chr10	1.8937876619481e-08	0.779177621445833	1	2.94117647058824e-10	7	284	865	FALSE	FALSE	0.981887836784458	0.981887836784458	20411617	rs144946193; rs75560949
chr10_20391413_GA_G	IC31_ICA_integrated	chr10_20413631_G_A	chr10_20391413_GA_G	IC31_ICA_integrated_CL_0000233_naive_chr10_20391413_GA_G_cs_1	2021	0.00814324105081954	-5.413519292989	1	IC31	ICA	integrated	CL_0000233_naive	chr10	1.8937876619481e-08	0.779177621445833	1	2.94117647058824e-10	7	284	865	FALSE	FALSE	0.981887836784458	0.981887836784458	20413631
chr10_20391413_GA_G	IC31_ICA_integrated	chr10_20413866_G_A	chr10_20391413_GA_G	IC31_ICA_integrated_CL_0000233_naive_chr10_20391413_GA_G_cs_1	2022	0.00814324105081954	-5.413519292989	1	IC31	ICA	integrated	CL_0000233_naive	chr10	1.8937876619481e-08	0.779177621445833	1	2.94117647058824e-10	7	284	865	FALSE	FALSE	0.981887836784458	0.981887836784458	20413866	rs16920490
chr10_20391413_GA_G	IC31_ICA_integrated	chr10_20414092_G_C	chr10_20391413_GA_G	IC31_ICA_integrated_CL_0000233_naive_chr10_20391413_GA_G_cs_1	2023	0.00814324105081954	-5.413519292989	1	IC31	ICA	integrated	CL_0000233_naive	chr10	1.8937876619481e-08	0.779177621445833	1	2.94117647058824e-10	7	284	865	FALSE	FALSE	0.981887836784458	0.981887836784458	20414092	rs56113716
chr10_20391413_GA_G	IC31_ICA_integrated	chr10_20414546_G_A	chr10_20391413_GA_G	IC31_ICA_integrated_CL_0000233_naive_chr10_20391413_GA_G_cs_1	2024	0.00814324105081954	-5.413519292989	1	IC31	ICA	integrated	CL_0000233_naive	chr10	1.8937876619481e-08	0.779177621445833	1	2.94117647058824e-10	7	284	865	FALSE	FALSE	0.981887836784458	0.981887836784458	20414546	rs55707145
chr10_20391413_GA_G	IC31_ICA_integrated	chr10_20415034_C_T	chr10_20391413_GA_G	IC31_ICA_integrated_CL_0000233_naive_chr10_20391413_GA_G_cs_1	2026	0.00814324105081954	-5.413519292989	1	IC31	ICA	integrated	CL_0000233_naive	chr10	1.8937876619481e-08	0.779177621445833	1	2.94117647058824e-10	7	284	865	FALSE	FALSE	0.981887836784458	0.981887836784458	20415034	rs55782255
chr10_20391413_GA_G	IC31_ICA_integrated	chr10_20415051_TTAAAA_TTAAAATAAAA	chr10_20391413_GA_G	IC31_ICA_integrated_CL_0000233_naive_chr10_20391413_GA_G_cs_1	2027	0.00814324105081954	-5.413519292989	1	IC31	ICA	integrated	CL_0000233_naive	chr10	1.8937876619481e-08	0.779177621445833	1	2.94117647058824e-10	7	284	865	FALSE	FALSE	0.981887836784458	0.981887836784458	20415051
chr10_20391413_GA_G	IC31_ICA_integrated	chr10_20415604_G_A	chr10_20391413_GA_G	IC31_ICA_integrated_CL_0000233_naive_chr10_20391413_GA_G_cs_1	2028	0.0171856293403866	-5.67737239870817	1	IC31	ICA	integrated	CL_0000233_naive	chr10	1.8937876619481e-08	0.779177621445833	1	2.94117647058824e-10	7	284	865	FALSE	FALSE	0.981887836784458	0.981887836784458	20415604	rs150637921
chr10_20391413_GA_G	IC31_ICA_integrated	chr10_20416204_G_C	chr10_20391413_GA_G	IC31_ICA_integrated_CL_0000233_naive_chr10_20391413_GA_G_cs_1	2029	0.00648283657198412	-5.32923027570805	1	IC31	ICA	integrated	CL_0000233_naive	chr10	1.8937876619481e-08	0.779177621445833	1	2.94117647058824e-10	7	284	865	FALSE	FALSE	0.981887836784458	0.981887836784458	20416204
chr10_20391413_GA_G	IC31_ICA_integrated	chr10_20416250_T_C	chr10_20391413_GA_G	IC31_ICA_integrated_CL_0000233_naive_chr10_20391413_GA_G_cs_1	2030	0.00814324105081954	-5.413519292989	1	IC31	ICA	integrated	CL_0000233_naive	chr10	1.8937876619481e-08	0.779177621445833	1	2.94117647058824e-10	7	284	865	FALSE	FALSE	0.981887836784458	0.981887836784458	20416250	rs72789274
chr10_20391413_GA_G	IC31_ICA_integrated	chr10_20416484_G_C	chr10_20391413_GA_G	IC31_ICA_integrated_CL_0000233_naive_chr10_20391413_GA_G_cs_1	2031	0.00814324105081954	-5.413519292989	1	IC31	ICA	integrated	CL_0000233_naive	chr10	1.8937876619481e-08	0.779177621445833	1	2.94117647058824e-10	7	284	865	FALSE	FALSE	0.981887836784458	0.981887836784458	20416484	rs72789275
chr10_20391413_GA_G	IC31_ICA_integrated	chr10_20417120_T_C	chr10_20391413_GA_G	IC31_ICA_integrated_CL_0000233_naive_chr10_20391413_GA_G_cs_1	2034	0.00814324105081954	-5.413519292989	1	IC31	ICA	integrated	CL_0000233_naive	chr10	1.8937876619481e-08	0.779177621445833	1	2.94117647058824e-10	7	284	865	FALSE	FALSE	0.981887836784458	0.981887836784458	20417120	rs72789276
chr10_20391413_GA_G	IC31_ICA_integrated	chr10_20417255_GA_G	chr10_20391413_GA_G	IC31_ICA_integrated_CL_0000233_naive_chr10_20391413_GA_G_cs_1	2035	0.00814324105081954	-5.413519292989	1	IC31	ICA	integrated	CL_0000233_naive	chr10	1.8937876619481e-08	0.779177621445833	1	2.94117647058824e-10	7	284	865	FALSE	FALSE	0.981887836784458	0.981887836784458	20417255	rs58525686; rs796992654
chr10_20391413_GA_G	IC31_ICA_integrated	chr10_20417406_T_G	chr10_20391413_GA_G	IC31_ICA_integrated_CL_0000233_naive_chr10_20391413_GA_G_cs_1	2036	0.00814324105081954	-5.413519292989	1	IC31	ICA	integrated	CL_0000233_naive	chr10	1.8937876619481e-08	0.779177621445833	1	2.94117647058824e-10	7	284	865	FALSE	FALSE	0.981887836784458	0.981887836784458	20417406	rs58046463
chr10_20391413_GA_G	IC31_ICA_integrated	chr10_20417843_C_G	chr10_20391413_GA_G	IC31_ICA_integrated_CL_0000233_naive_chr10_20391413_GA_G_cs_1	2037	0.00814324105081954	-5.413519292989	1	IC31	ICA	integrated	CL_0000233_naive	chr10	1.8937876619481e-08	0.779177621445833	1	2.94117647058824e-10	7	284	865	FALSE	FALSE	0.981887836784458	0.981887836784458	20417843	rs61199965
chr10_20391413_GA_G	IC31_ICA_integrated	chr10_20418062_G_A	chr10_20391413_GA_G	IC31_ICA_integrated_CL_0000233_naive_chr10_20391413_GA_G_cs_1	2041	0.00814324105081954	-5.413519292989	1	IC31	ICA	integrated	CL_0000233_naive	chr10	1.8937876619481e-08	0.779177621445833	1	2.94117647058824e-10	7	284	865	FALSE	FALSE	0.981887836784458	0.981887836784458	20418062	rs72789281
chr10_20391413_GA_G	IC31_ICA_integrated	chr10_20418098_G_T	chr10_20391413_GA_G	IC31_ICA_integrated_CL_0000233_naive_chr10_20391413_GA_G_cs_1	2042	0.00814324105081954	-5.413519292989	1	IC31	ICA	integrated	CL_0000233_naive	chr10	1.8937876619481e-08	0.779177621445833	1	2.94117647058824e-10	7	284	865	FALSE	FALSE	0.981887836784458	0.981887836784458	20418098
chr10_20391413_GA_G	IC31_ICA_integrated	chr10_20418122_C_G	chr10_20391413_GA_G	IC31_ICA_integrated_CL_0000233_naive_chr10_20391413_GA_G_cs_1	2043	0.00814324105081954	-5.413519292989	1	IC31	ICA	integrated	CL_0000233_naive	chr10	1.8937876619481e-08	0.779177621445833	1	2.94117647058824e-10	7	284	865	FALSE	FALSE	0.981887836784458	0.981887836784458	20418122	rs72789283
chr10_20391413_GA_G	IC31_ICA_integrated	chr10_20418133_T_C	chr10_20391413_GA_G	IC31_ICA_integrated_CL_0000233_naive_chr10_20391413_GA_G_cs_1	2044	0.00814324105081954	-5.413519292989	1	IC31	ICA	integrated	CL_0000233_naive	chr10	1.8937876619481e-08	0.779177621445833	1	2.94117647058824e-10	7	284	865	FALSE	FALSE	0.981887836784458	0.981887836784458	20418133	rs16920492
chr10_20391413_GA_G	IC31_ICA_integrated	chr10_20418247_C_CTT	chr10_20391413_GA_G	IC31_ICA_integrated_CL_0000233_naive_chr10_20391413_GA_G_cs_1	2045	0.00814324105081954	-5.413519292989	1	IC31	ICA	integrated	CL_0000233_naive	chr10	1.8937876619481e-08	0.779177621445833	1	2.94117647058824e-10	7	284	865	FALSE	FALSE	0.981887836784458	0.981887836784458	20418247	rs140895858
chr10_20391413_GA_G	IC31_ICA_integrated	chr10_20418661_T_C	chr10_20391413_GA_G	IC31_ICA_integrated_CL_0000233_naive_chr10_20391413_GA_G_cs_1	2046	0.00814324105081954	-5.413519292989	1	IC31	ICA	integrated	CL_0000233_naive	chr10	1.8937876619481e-08	0.779177621445833	1	2.94117647058824e-10	7	284	865	FALSE	FALSE	0.981887836784458	0.981887836784458	20418661	rs56064023
chr10_20391413_GA_G	IC31_ICA_integrated	chr10_20418694_C_A	chr10_20391413_GA_G	IC31_ICA_integrated_CL_0000233_naive_chr10_20391413_GA_G_cs_1	2047	0.00814324105081954	-5.413519292989	1	IC31	ICA	integrated	CL_0000233_naive	chr10	1.8937876619481e-08	0.779177621445833	1	2.94117647058824e-10	7	284	865	FALSE	FALSE	0.981887836784458	0.981887836784458	20418694	rs56136827
chr10_20391413_GA_G	IC31_ICA_integrated	chr10_20419680_C_T	chr10_20391413_GA_G	IC31_ICA_integrated_CL_0000233_naive_chr10_20391413_GA_G_cs_1	2048	0.00814324105081954	-5.413519292989	1	IC31	ICA	integrated	CL_0000233_naive	chr10	1.8937876619481e-08	0.779177621445833	1	2.94117647058824e-10	7	284	865	FALSE	FALSE	0.981887836784458	0.981887836784458	20419680	rs2211148
chr10_20391413_GA_G	IC31_ICA_integrated	chr10_20420049_A_G	chr10_20391413_GA_G	IC31_ICA_integrated_CL_0000233_naive_chr10_20391413_GA_G_cs_1	2050	0.00814324105081954	-5.413519292989	1	IC31	ICA	integrated	CL_0000233_naive	chr10	1.8937876619481e-08	0.779177621445833	1	2.94117647058824e-10	7	284	865	FALSE	FALSE	0.981887836784458	0.981887836784458	20420049	rs112730388
chr10_20391413_GA_G	IC31_ICA_integrated	chr10_20420328_G_C	chr10_20391413_GA_G	IC31_ICA_integrated_CL_0000233_naive_chr10_20391413_GA_G_cs_1	2051	0.00814324105081954	-5.413519292989	1	IC31	ICA	integrated	CL_0000233_naive	chr10	1.8937876619481e-08	0.779177621445833	1	2.94117647058824e-10	7	284	865	FALSE	FALSE	0.981887836784458	0.981887836784458	20420328	rs142107401
chr10_20391413_GA_G	IC31_ICA_integrated	chr10_20420349_A_G	chr10_20391413_GA_G	IC31_ICA_integrated_CL_0000233_naive_chr10_20391413_GA_G_cs_1	2052	0.00814324105081954	-5.413519292989	1	IC31	ICA	integrated	CL_0000233_naive	chr10	1.8937876619481e-08	0.779177621445833	1	2.94117647058824e-10	7	284	865	FALSE	FALSE	0.981887836784458	0.981887836784458	20420349	rs113046895
chr10_20391413_GA_G	IC31_ICA_integrated	chr10_20420412_G_A	chr10_20391413_GA_G	IC31_ICA_integrated_CL_0000233_naive_chr10_20391413_GA_G_cs_1	2053	0.00814324105081954	-5.413519292989	1	IC31	ICA	integrated	CL_0000233_naive	chr10	1.8937876619481e-08	0.779177621445833	1	2.94117647058824e-10	7	284	865	FALSE	FALSE	0.981887836784458	0.981887836784458	20420412	rs147806082
chr10_20391413_GA_G	IC31_ICA_integrated	chr10_20420566_C_G	chr10_20391413_GA_G	IC31_ICA_integrated_CL_0000233_naive_chr10_20391413_GA_G_cs_1	2054	0.00814324105081954	-5.413519292989	1	IC31	ICA	integrated	CL_0000233_naive	chr10	1.8937876619481e-08	0.779177621445833	1	2.94117647058824e-10	7	284	865	FALSE	FALSE	0.981887836784458	0.981887836784458	20420566	rs141321582
chr10_20391413_GA_G	IC31_ICA_integrated	chr10_20420815_C_A	chr10_20391413_GA_G	IC31_ICA_integrated_CL_0000233_naive_chr10_20391413_GA_G_cs_1	2056	0.00814324105081954	-5.413519292989	1	IC31	ICA	integrated	CL_0000233_naive	chr10	1.8937876619481e-08	0.779177621445833	1	2.94117647058824e-10	7	284	865	FALSE	FALSE	0.981887836784458	0.981887836784458	20420815	rs111439558
chr10_20391413_GA_G	IC31_ICA_integrated	chr10_20420878_C_T	chr10_20391413_GA_G	IC31_ICA_integrated_CL_0000233_naive_chr10_20391413_GA_G_cs_1	2057	0.00814324105081954	-5.413519292989	1	IC31	ICA	integrated	CL_0000233_naive	chr10	1.8937876619481e-08	0.779177621445833	1	2.94117647058824e-10	7	284	865	FALSE	FALSE	0.981887836784458	0.981887836784458	20420878	rs183469813
chr10_20391413_GA_G	IC31_ICA_integrated	chr10_20420955_C_T	chr10_20391413_GA_G	IC31_ICA_integrated_CL_0000233_naive_chr10_20391413_GA_G_cs_1	2058	0.00814324105081954	-5.413519292989	1	IC31	ICA	integrated	CL_0000233_naive	chr10	1.8937876619481e-08	0.779177621445833	1	2.94117647058824e-10	7	284	865	FALSE	FALSE	0.981887836784458	0.981887836784458	20420955
chr10_20391413_GA_G	IC31_ICA_integrated	chr10_20421124_C_G	chr10_20391413_GA_G	IC31_ICA_integrated_CL_0000233_naive_chr10_20391413_GA_G_cs_1	2059	0.00814324105081954	-5.413519292989	1	IC31	ICA	integrated	CL_0000233_naive	chr10	1.8937876619481e-08	0.779177621445833	1	2.94117647058824e-10	7	284	865	FALSE	FALSE	0.981887836784458	0.981887836784458	20421124
chr10_20391413_GA_G	IC31_ICA_integrated	chr10_20421286_G_A	chr10_20391413_GA_G	IC31_ICA_integrated_CL_0000233_naive_chr10_20391413_GA_G_cs_1	2060	0.00814324105081954	-5.413519292989	1	IC31	ICA	integrated	CL_0000233_naive	chr10	1.8937876619481e-08	0.779177621445833	1	2.94117647058824e-10	7	284	865	FALSE	FALSE	0.981887836784458	0.981887836784458	20421286	rs56379385
chr10_20391413_GA_G	IC31_ICA_integrated	chr10_20421361_T_C	chr10_20391413_GA_G	IC31_ICA_integrated_CL_0000233_naive_chr10_20391413_GA_G_cs_1	2061	0.00814324105081954	-5.413519292989	1	IC31	ICA	integrated	CL_0000233_naive	chr10	1.8937876619481e-08	0.779177621445833	1	2.94117647058824e-10	7	284	865	FALSE	FALSE	0.981887836784458	0.981887836784458	20421361	rs56055257
chr10_20391413_GA_G	IC31_ICA_integrated	chr10_20421469_T_G	chr10_20391413_GA_G	IC31_ICA_integrated_CL_0000233_naive_chr10_20391413_GA_G_cs_1	2063	0.00814324105081954	-5.413519292989	1	IC31	ICA	integrated	CL_0000233_naive	chr10	1.8937876619481e-08	0.779177621445833	1	2.94117647058824e-10	7	284	865	FALSE	FALSE	0.981887836784458	0.981887836784458	20421469	rs56252028
chr10_20391413_GA_G	IC31_ICA_integrated	chr10_20421583_C_T	chr10_20391413_GA_G	IC31_ICA_integrated_CL_0000233_naive_chr10_20391413_GA_G_cs_1	2064	0.00814324105081954	-5.413519292989	1	IC31	ICA	integrated	CL_0000233_naive	chr10	1.8937876619481e-08	0.779177621445833	1	2.94117647058824e-10	7	284	865	FALSE	FALSE	0.981887836784458	0.981887836784458	20421583	rs56395276
chr10_20391413_GA_G	IC31_ICA_integrated	chr10_20421893_T_A	chr10_20391413_GA_G	IC31_ICA_integrated_CL_0000233_naive_chr10_20391413_GA_G_cs_1	2065	0.00814324105081954	-5.413519292989	1	IC31	ICA	integrated	CL_0000233_naive	chr10	1.8937876619481e-08	0.779177621445833	1	2.94117647058824e-10	7	284	865	FALSE	FALSE	0.981887836784458	0.981887836784458	20421893	rs72789288
chr10_20391413_GA_G	IC31_ICA_integrated	chr10_20422313_G_T	chr10_20391413_GA_G	IC31_ICA_integrated_CL_0000233_naive_chr10_20391413_GA_G_cs_1	2067	0.00814324105081954	-5.413519292989	1	IC31	ICA	integrated	CL_0000233_naive	chr10	1.8937876619481e-08	0.779177621445833	1	2.94117647058824e-10	7	284	865	FALSE	FALSE	0.981887836784458	0.981887836784458	20422313	rs72789289
chr10_20391413_GA_G	IC31_ICA_integrated	chr10_20422582_G_T	chr10_20391413_GA_G	IC31_ICA_integrated_CL_0000233_naive_chr10_20391413_GA_G_cs_1	2068	0.00814324105081954	-5.413519292989	1	IC31	ICA	integrated	CL_0000233_naive	chr10	1.8937876619481e-08	0.779177621445833	1	2.94117647058824e-10	7	284	865	FALSE	FALSE	0.981887836784458	0.981887836784458	20422582
chr10_20391413_GA_G	IC31_ICA_integrated	chr10_20422764_A_G	chr10_20391413_GA_G	IC31_ICA_integrated_CL_0000233_naive_chr10_20391413_GA_G_cs_1	2069	0.00814324105081954	-5.413519292989	1	IC31	ICA	integrated	CL_0000233_naive	chr10	1.8937876619481e-08	0.779177621445833	1	2.94117647058824e-10	7	284	865	FALSE	FALSE	0.981887836784458	0.981887836784458	20422764	rs55878076
chr10_20391413_GA_G	IC31_ICA_integrated	chr10_20422879_T_C	chr10_20391413_GA_G	IC31_ICA_integrated_CL_0000233_naive_chr10_20391413_GA_G_cs_1	2070	0.00641596739262751	-5.28273197159761	1	IC31	ICA	integrated	CL_0000233_naive	chr10	1.8937876619481e-08	0.779177621445833	1	2.94117647058824e-10	7	284	865	FALSE	FALSE	0.981887836784458	0.981887836784458	20422879	rs56054969
chr10_20391413_GA_G	IC31_ICA_integrated	chr10_20423048_G_A	chr10_20391413_GA_G	IC31_ICA_integrated_CL_0000233_naive_chr10_20391413_GA_G_cs_1	2072	0.00814324105081954	-5.413519292989	1	IC31	ICA	integrated	CL_0000233_naive	chr10	1.8937876619481e-08	0.779177621445833	1	2.94117647058824e-10	7	284	865	FALSE	FALSE	0.981887836784458	0.981887836784458	20423048	rs72789290
chr10_20391413_GA_G	IC31_ICA_integrated	chr10_20423353_GT_G	chr10_20391413_GA_G	IC31_ICA_integrated_CL_0000233_naive_chr10_20391413_GA_G_cs_1	2073	0.00814324105081954	-5.413519292989	1	IC31	ICA	integrated	CL_0000233_naive	chr10	1.8937876619481e-08	0.779177621445833	1	2.94117647058824e-10	7	284	865	FALSE	FALSE	0.981887836784458	0.981887836784458	20423353	rs140905920; rs754170420
chr10_20391413_GA_G	IC31_ICA_integrated	chr10_20423363_GT_G	chr10_20391413_GA_G	IC31_ICA_integrated_CL_0000233_naive_chr10_20391413_GA_G_cs_1	2074	0.00814324105081954	-5.413519292989	1	IC31	ICA	integrated	CL_0000233_naive	chr10	1.8937876619481e-08	0.779177621445833	1	2.94117647058824e-10	7	284	865	FALSE	FALSE	0.981887836784458	0.981887836784458	20423363	rs372623444
chr10_20391413_GA_G	IC31_ICA_integrated	chr10_20423592_C_T	chr10_20391413_GA_G	IC31_ICA_integrated_CL_0000233_naive_chr10_20391413_GA_G_cs_1	2076	0.00814324105081954	-5.413519292989	1	IC31	ICA	integrated	CL_0000233_naive	chr10	1.8937876619481e-08	0.779177621445833	1	2.94117647058824e-10	7	284	865	FALSE	FALSE	0.981887836784458	0.981887836784458	20423592	rs112201387
chr10_20391413_GA_G	IC31_ICA_integrated	chr10_20424163_T_TC	chr10_20391413_GA_G	IC31_ICA_integrated_CL_0000233_naive_chr10_20391413_GA_G_cs_1	2077	0.00814324105081954	-5.413519292989	1	IC31	ICA	integrated	CL_0000233_naive	chr10	1.8937876619481e-08	0.779177621445833	1	2.94117647058824e-10	7	284	865	FALSE	FALSE	0.981887836784458	0.981887836784458	20424163	rs144439006
chr10_20391413_GA_G	IC31_ICA_integrated	chr10_20424188_G_C	chr10_20391413_GA_G	IC31_ICA_integrated_CL_0000233_naive_chr10_20391413_GA_G_cs_1	2078	0.00814324105081954	-5.413519292989	1	IC31	ICA	integrated	CL_0000233_naive	chr10	1.8937876619481e-08	0.779177621445833	1	2.94117647058824e-10	7	284	865	FALSE	FALSE	0.981887836784458	0.981887836784458	20424188	rs72789293
chr10_20391413_GA_G	IC31_ICA_integrated	chr10_20424284_A_G	chr10_20391413_GA_G	IC31_ICA_integrated_CL_0000233_naive_chr10_20391413_GA_G_cs_1	2079	0.00814324105081954	-5.413519292989	1	IC31	ICA	integrated	CL_0000233_naive	chr10	1.8937876619481e-08	0.779177621445833	1	2.94117647058824e-10	7	284	865	FALSE	FALSE	0.981887836784458	0.981887836784458	20424284	rs72789294
chr10_20391413_GA_G	IC31_ICA_integrated	chr10_20424352_C_T	chr10_20391413_GA_G	IC31_ICA_integrated_CL_0000233_naive_chr10_20391413_GA_G_cs_1	2080	0.00814324105081954	-5.413519292989	1	IC31	ICA	integrated	CL_0000233_naive	chr10	1.8937876619481e-08	0.779177621445833	1	2.94117647058824e-10	7	284	865	FALSE	FALSE	0.981887836784458	0.981887836784458	20424352	rs72789295
chr10_20391413_GA_G	IC31_ICA_integrated	chr10_20424598_C_T	chr10_20391413_GA_G	IC31_ICA_integrated_CL_0000233_naive_chr10_20391413_GA_G_cs_1	2081	0.00814324105081954	-5.413519292989	1	IC31	ICA	integrated	CL_0000233_naive	chr10	1.8937876619481e-08	0.779177621445833	1	2.94117647058824e-10	7	284	865	FALSE	FALSE	0.981887836784458	0.981887836784458	20424598	rs72789296
chr10_20391413_GA_G	IC31_ICA_integrated	chr10_20424864_C_A	chr10_20391413_GA_G	IC31_ICA_integrated_CL_0000233_naive_chr10_20391413_GA_G_cs_1	2082	0.00814324105081954	-5.413519292989	1	IC31	ICA	integrated	CL_0000233_naive	chr10	1.8937876619481e-08	0.779177621445833	1	2.94117647058824e-10	7	284	865	FALSE	FALSE	0.981887836784458	0.981887836784458	20424864	rs56119932
chr10_20391413_GA_G	IC31_ICA_integrated	chr10_20425109_A_T	chr10_20391413_GA_G	IC31_ICA_integrated_CL_0000233_naive_chr10_20391413_GA_G_cs_1	2084	0.00814324105081954	-5.413519292989	1	IC31	ICA	integrated	CL_0000233_naive	chr10	1.8937876619481e-08	0.779177621445833	1	2.94117647058824e-10	7	284	865	FALSE	FALSE	0.981887836784458	0.981887836784458	20425109	rs56080367
chr10_20391413_GA_G	IC31_ICA_integrated	chr10_20425446_CT_C	chr10_20391413_GA_G	IC31_ICA_integrated_CL_0000233_naive_chr10_20391413_GA_G_cs_1	2085	0.00814324105081954	-5.413519292989	1	IC31	ICA	integrated	CL_0000233_naive	chr10	1.8937876619481e-08	0.779177621445833	1	2.94117647058824e-10	7	284	865	FALSE	FALSE	0.981887836784458	0.981887836784458	20425446	rs140407996
chr10_20391413_GA_G	IC31_ICA_integrated	chr10_20425639_T_C	chr10_20391413_GA_G	IC31_ICA_integrated_CL_0000233_naive_chr10_20391413_GA_G_cs_1	2086	0.00814324105081954	-5.413519292989	1	IC31	ICA	integrated	CL_0000233_naive	chr10	1.8937876619481e-08	0.779177621445833	1	2.94117647058824e-10	7	284	865	FALSE	FALSE	0.981887836784458	0.981887836784458	20425639	rs72789299
chr10_20391413_GA_G	IC31_ICA_integrated	chr10_20425679_T_C	chr10_20391413_GA_G	IC31_ICA_integrated_CL_0000233_naive_chr10_20391413_GA_G_cs_1	2087	0.00814324105081954	-5.413519292989	1	IC31	ICA	integrated	CL_0000233_naive	chr10	1.8937876619481e-08	0.779177621445833	1	2.94117647058824e-10	7	284	865	FALSE	FALSE	0.981887836784458	0.981887836784458	20425679	rs72789300
chr10_20391413_GA_G	IC31_ICA_integrated	chr10_20425705_C_T	chr10_20391413_GA_G	IC31_ICA_integrated_CL_0000233_naive_chr10_20391413_GA_G_cs_1	2088	0.00814324105081954	-5.413519292989	1	IC31	ICA	integrated	CL_0000233_naive	chr10	1.8937876619481e-08	0.779177621445833	1	2.94117647058824e-10	7	284	865	FALSE	FALSE	0.981887836784458	0.981887836784458	20425705	rs72789302
chr10_20391413_GA_G	IC31_ICA_integrated	chr10_20425770_C_T	chr10_20391413_GA_G	IC31_ICA_integrated_CL_0000233_naive_chr10_20391413_GA_G_cs_1	2089	0.00814324105081954	-5.413519292989	1	IC31	ICA	integrated	CL_0000233_naive	chr10	1.8937876619481e-08	0.779177621445833	1	2.94117647058824e-10	7	284	865	FALSE	FALSE	0.981887836784458	0.981887836784458	20425770	rs72791203
chr10_20391413_GA_G	IC31_ICA_integrated	chr10_20426390_C_T	chr10_20391413_GA_G	IC31_ICA_integrated_CL_0000233_naive_chr10_20391413_GA_G_cs_1	2090	0.00814324105081954	-5.413519292989	1	IC31	ICA	integrated	CL_0000233_naive	chr10	1.8937876619481e-08	0.779177621445833	1	2.94117647058824e-10	7	284	865	FALSE	FALSE	0.981887836784458	0.981887836784458	20426390	rs1582161
chr10_20391413_GA_G	IC31_ICA_integrated	chr10_20426398_G_GT	chr10_20391413_GA_G	IC31_ICA_integrated_CL_0000233_naive_chr10_20391413_GA_G_cs_1	2091	0.00814324105081954	-5.413519292989	1	IC31	ICA	integrated	CL_0000233_naive	chr10	1.8937876619481e-08	0.779177621445833	1	2.94117647058824e-10	7	284	865	FALSE	FALSE	0.981887836784458	0.981887836784458	20426398	rs147941776
chr10_20391413_GA_G	IC31_ICA_integrated	chr10_20426883_T_G	chr10_20391413_GA_G	IC31_ICA_integrated_CL_0000233_naive_chr10_20391413_GA_G_cs_1	2092	0.00814324105081954	-5.413519292989	1	IC31	ICA	integrated	CL_0000233_naive	chr10	1.8937876619481e-08	0.779177621445833	1	2.94117647058824e-10	7	284	865	FALSE	FALSE	0.981887836784458	0.981887836784458	20426883	rs56001148
chr10_20391413_GA_G	IC31_ICA_integrated	chr10_20426923_T_G	chr10_20391413_GA_G	IC31_ICA_integrated_CL_0000233_naive_chr10_20391413_GA_G_cs_1	2093	0.00814324105081954	-5.413519292989	1	IC31	ICA	integrated	CL_0000233_naive	chr10	1.8937876619481e-08	0.779177621445833	1	2.94117647058824e-10	7	284	865	FALSE	FALSE	0.981887836784458	0.981887836784458	20426923	rs55829750
chr10_20391413_GA_G	IC31_ICA_integrated	chr10_20429057_A_T	chr10_20391413_GA_G	IC31_ICA_integrated_CL_0000233_naive_chr10_20391413_GA_G_cs_1	2099	0.00814324105081954	-5.413519292989	1	IC31	ICA	integrated	CL_0000233_naive	chr10	1.8937876619481e-08	0.779177621445833	1	2.94117647058824e-10	7	284	865	FALSE	FALSE	0.981887836784458	0.981887836784458	20429057	rs56394272
chr10_20391413_GA_G	IC31_ICA_integrated	chr10_20430592_G_T	chr10_20391413_GA_G	IC31_ICA_integrated_CL_0000233_naive_chr10_20391413_GA_G_cs_1	2102	0.00814324105081954	-5.413519292989	1	IC31	ICA	integrated	CL_0000233_naive	chr10	1.8937876619481e-08	0.779177621445833	1	2.94117647058824e-10	7	284	865	FALSE	FALSE	0.981887836784458	0.981887836784458	20430592	rs72791204
chr10_20391413_GA_G	IC31_ICA_integrated	chr10_20430673_C_T	chr10_20391413_GA_G	IC31_ICA_integrated_CL_0000233_naive_chr10_20391413_GA_G_cs_1	2103	0.00814324105081954	-5.413519292989	1	IC31	ICA	integrated	CL_0000233_naive	chr10	1.8937876619481e-08	0.779177621445833	1	2.94117647058824e-10	7	284	865	FALSE	FALSE	0.981887836784458	0.981887836784458	20430673	rs72791206
chr10_20391413_GA_G	IC31_ICA_integrated	chr10_20430801_T_G	chr10_20391413_GA_G	IC31_ICA_integrated_CL_0000233_naive_chr10_20391413_GA_G_cs_1	2104	0.00814324105081954	-5.413519292989	1	IC31	ICA	integrated	CL_0000233_naive	chr10	1.8937876619481e-08	0.779177621445833	1	2.94117647058824e-10	7	284	865	FALSE	FALSE	0.981887836784458	0.981887836784458	20430801	rs72791207
chr10_20391413_GA_G	IC31_ICA_integrated	chr10_20431349_G_C	chr10_20391413_GA_G	IC31_ICA_integrated_CL_0000233_naive_chr10_20391413_GA_G_cs_1	2106	0.00406052560201997	-5.11891929094114	1	IC31	ICA	integrated	CL_0000233_naive	chr10	1.8937876619481e-08	0.779177621445833	1	2.94117647058824e-10	7	284	865	FALSE	FALSE	0.981887836784458	0.981887836784458	20431349
chr10_20391413_GA_G	IC31_ICA_integrated	chr10_20431686_C_T	chr10_20391413_GA_G	IC31_ICA_integrated_CL_0000233_naive_chr10_20391413_GA_G_cs_1	2108	0.00814324105081954	-5.413519292989	1	IC31	ICA	integrated	CL_0000233_naive	chr10	1.8937876619481e-08	0.779177621445833	1	2.94117647058824e-10	7	284	865	FALSE	FALSE	0.981887836784458	0.981887836784458	20431686
chr10_20391413_GA_G	IC31_ICA_integrated	chr10_20431991_C_T	chr10_20391413_GA_G	IC31_ICA_integrated_CL_0000233_naive_chr10_20391413_GA_G_cs_1	2109	0.00814324105081954	-5.413519292989	1	IC31	ICA	integrated	CL_0000233_naive	chr10	1.8937876619481e-08	0.779177621445833	1	2.94117647058824e-10	7	284	865	FALSE	FALSE	0.981887836784458	0.981887836784458	20431991
chr10_20391413_GA_G	IC31_ICA_integrated	chr10_20432909_A_C	chr10_20391413_GA_G	IC31_ICA_integrated_CL_0000233_naive_chr10_20391413_GA_G_cs_1	2110	0.00814324105081954	-5.413519292989	1	IC31	ICA	integrated	CL_0000233_naive	chr10	1.8937876619481e-08	0.779177621445833	1	2.94117647058824e-10	7	284	865	FALSE	FALSE	0.981887836784458	0.981887836784458	20432909	rs72791211
chr10_20391413_GA_G	IC31_ICA_integrated	chr10_20433296_A_G	chr10_20391413_GA_G	IC31_ICA_integrated_CL_0000233_naive_chr10_20391413_GA_G_cs_1	2112	0.00814324105081954	-5.413519292989	1	IC31	ICA	integrated	CL_0000233_naive	chr10	1.8937876619481e-08	0.779177621445833	1	2.94117647058824e-10	7	284	865	FALSE	FALSE	0.981887836784458	0.981887836784458	20433296	rs67920369
chr10_20391413_GA_G	IC31_ICA_integrated	chr10_20433405_A_G	chr10_20391413_GA_G	IC31_ICA_integrated_CL_0000233_naive_chr10_20391413_GA_G_cs_1	2113	0.00814324105081954	-5.413519292989	1	IC31	ICA	integrated	CL_0000233_naive	chr10	1.8937876619481e-08	0.779177621445833	1	2.94117647058824e-10	7	284	865	FALSE	FALSE	0.981887836784458	0.981887836784458	20433405	rs72791213
chr10_20391413_GA_G	IC31_ICA_integrated	chr10_20433761_C_T	chr10_20391413_GA_G	IC31_ICA_integrated_CL_0000233_naive_chr10_20391413_GA_G_cs_1	2114	0.00814324105081954	-5.413519292989	1	IC31	ICA	integrated	CL_0000233_naive	chr10	1.8937876619481e-08	0.779177621445833	1	2.94117647058824e-10	7	284	865	FALSE	FALSE	0.981887836784458	0.981887836784458	20433761
chr10_20391413_GA_G	IC31_ICA_integrated	chr10_20433835_T_G	chr10_20391413_GA_G	IC31_ICA_integrated_CL_0000233_naive_chr10_20391413_GA_G_cs_1	2115	0.00814324105081954	-5.413519292989	1	IC31	ICA	integrated	CL_0000233_naive	chr10	1.8937876619481e-08	0.779177621445833	1	2.94117647058824e-10	7	284	865	FALSE	FALSE	0.981887836784458	0.981887836784458	20433835	rs55931204
chr10_20391413_GA_G	IC31_ICA_integrated	chr10_20434760_T_C	chr10_20391413_GA_G	IC31_ICA_integrated_CL_0000233_naive_chr10_20391413_GA_G_cs_1	2117	0.00814324105081954	-5.413519292989	1	IC31	ICA	integrated	CL_0000233_naive	chr10	1.8937876619481e-08	0.779177621445833	1	2.94117647058824e-10	7	284	865	FALSE	FALSE	0.981887836784458	0.981887836784458	20434760	rs72791214
chr10_20391413_GA_G	IC31_ICA_integrated	chr10_20435259_T_C	chr10_20391413_GA_G	IC31_ICA_integrated_CL_0000233_naive_chr10_20391413_GA_G_cs_1	2119	0.00814324105081954	-5.413519292989	1	IC31	ICA	integrated	CL_0000233_naive	chr10	1.8937876619481e-08	0.779177621445833	1	2.94117647058824e-10	7	284	865	FALSE	FALSE	0.981887836784458	0.981887836784458	20435259	rs56306290
chr10_20391413_GA_G	IC31_ICA_integrated	chr10_20435491_GT_G	chr10_20391413_GA_G	IC31_ICA_integrated_CL_0000233_naive_chr10_20391413_GA_G_cs_1	2121	0.00814324105081954	-5.413519292989	1	IC31	ICA	integrated	CL_0000233_naive	chr10	1.8937876619481e-08	0.779177621445833	1	2.94117647058824e-10	7	284	865	FALSE	FALSE	0.981887836784458	0.981887836784458	20435491	rs61494778; rs796382980
chr10_20391413_GA_G	IC31_ICA_integrated	chr10_20436021_C_T	chr10_20391413_GA_G	IC31_ICA_integrated_CL_0000233_naive_chr10_20391413_GA_G_cs_1	2123	0.00814324105081954	-5.413519292989	1	IC31	ICA	integrated	CL_0000233_naive	chr10	1.8937876619481e-08	0.779177621445833	1	2.94117647058824e-10	7	284	865	FALSE	FALSE	0.981887836784458	0.981887836784458	20436021	rs1953837
chr10_20391413_GA_G	IC31_ICA_integrated	chr10_20436572_C_T	chr10_20391413_GA_G	IC31_ICA_integrated_CL_0000233_naive_chr10_20391413_GA_G_cs_1	2125	0.00814324105081954	-5.413519292989	1	IC31	ICA	integrated	CL_0000233_naive	chr10	1.8937876619481e-08	0.779177621445833	1	2.94117647058824e-10	7	284	865	FALSE	FALSE	0.981887836784458	0.981887836784458	20436572	rs56191865
chr10_20391413_GA_G	IC31_ICA_integrated	chr10_20436696_T_A	chr10_20391413_GA_G	IC31_ICA_integrated_CL_0000233_naive_chr10_20391413_GA_G_cs_1	2126	0.00814324105081954	-5.413519292989	1	IC31	ICA	integrated	CL_0000233_naive	chr10	1.8937876619481e-08	0.779177621445833	1	2.94117647058824e-10	7	284	865	FALSE	FALSE	0.981887836784458	0.981887836784458	20436696	rs56361418
chr10_20391413_GA_G	IC31_ICA_integrated	chr10_20436701_TTTTATTTTAC_T	chr10_20391413_GA_G	IC31_ICA_integrated_CL_0000233_naive_chr10_20391413_GA_G_cs_1	2127	0.00814324105081954	-5.413519292989	1	IC31	ICA	integrated	CL_0000233_naive	chr10	1.8937876619481e-08	0.779177621445833	1	2.94117647058824e-10	7	284	865	FALSE	FALSE	0.981887836784458	0.981887836784458	20436701	rs143909390; rs55825773
chr10_20391413_GA_G	IC31_ICA_integrated	chr10_20436966_C_A	chr10_20391413_GA_G	IC31_ICA_integrated_CL_0000233_naive_chr10_20391413_GA_G_cs_1	2129	0.00814324105081954	-5.413519292989	1	IC31	ICA	integrated	CL_0000233_naive	chr10	1.8937876619481e-08	0.779177621445833	1	2.94117647058824e-10	7	284	865	FALSE	FALSE	0.981887836784458	0.981887836784458	20436966
chr10_20391413_GA_G	IC31_ICA_integrated	chr10_20437309_G_A	chr10_20391413_GA_G	IC31_ICA_integrated_CL_0000233_naive_chr10_20391413_GA_G_cs_1	2130	0.00814324105081954	-5.413519292989	1	IC31	ICA	integrated	CL_0000233_naive	chr10	1.8937876619481e-08	0.779177621445833	1	2.94117647058824e-10	7	284	865	FALSE	FALSE	0.981887836784458	0.981887836784458	20437309	rs55682577
chr10_20391413_GA_G	IC31_ICA_integrated	chr10_20437342_G_T	chr10_20391413_GA_G	IC31_ICA_integrated_CL_0000233_naive_chr10_20391413_GA_G_cs_1	2131	0.00814324105081954	-5.413519292989	1	IC31	ICA	integrated	CL_0000233_naive	chr10	1.8937876619481e-08	0.779177621445833	1	2.94117647058824e-10	7	284	865	FALSE	FALSE	0.981887836784458	0.981887836784458	20437342	rs55902231
chr10_20391413_GA_G	IC31_ICA_integrated	chr10_20438148_T_G	chr10_20391413_GA_G	IC31_ICA_integrated_CL_0000233_naive_chr10_20391413_GA_G_cs_1	2135	0.00814324105081954	-5.413519292989	1	IC31	ICA	integrated	CL_0000233_naive	chr10	1.8937876619481e-08	0.779177621445833	1	2.94117647058824e-10	7	284	865	FALSE	FALSE	0.981887836784458	0.981887836784458	20438148
chr10_20391413_GA_G	IC31_ICA_integrated	chr10_20438149_A_C	chr10_20391413_GA_G	IC31_ICA_integrated_CL_0000233_naive_chr10_20391413_GA_G_cs_1	2136	0.00814324105081954	-5.413519292989	1	IC31	ICA	integrated	CL_0000233_naive	chr10	1.8937876619481e-08	0.779177621445833	1	2.94117647058824e-10	7	284	865	FALSE	FALSE	0.981887836784458	0.981887836784458	20438149	rs55801339
chr10_20391413_GA_G	IC31_ICA_integrated	chr10_20438249_A_G	chr10_20391413_GA_G	IC31_ICA_integrated_CL_0000233_naive_chr10_20391413_GA_G_cs_1	2137	0.00814324105081954	-5.413519292989	1	IC31	ICA	integrated	CL_0000233_naive	chr10	1.8937876619481e-08	0.779177621445833	1	2.94117647058824e-10	7	284	865	FALSE	FALSE	0.981887836784458	0.981887836784458	20438249	rs55656232
chr10_20391413_GA_G	IC31_ICA_integrated	chr10_20438288_G_C	chr10_20391413_GA_G	IC31_ICA_integrated_CL_0000233_naive_chr10_20391413_GA_G_cs_1	2138	0.00814324105081954	-5.413519292989	1	IC31	ICA	integrated	CL_0000233_naive	chr10	1.8937876619481e-08	0.779177621445833	1	2.94117647058824e-10	7	284	865	FALSE	FALSE	0.981887836784458	0.981887836784458	20438288	rs117935725
chr10_20391413_GA_G	IC31_ICA_integrated	chr10_20438631_G_A	chr10_20391413_GA_G	IC31_ICA_integrated_CL_0000233_naive_chr10_20391413_GA_G_cs_1	2139	0.00814324105081954	-5.413519292989	1	IC31	ICA	integrated	CL_0000233_naive	chr10	1.8937876619481e-08	0.779177621445833	1	2.94117647058824e-10	7	284	865	FALSE	FALSE	0.981887836784458	0.981887836784458	20438631	rs56276199
chr10_20391413_GA_G	IC31_ICA_integrated	chr10_20438661_G_T	chr10_20391413_GA_G	IC31_ICA_integrated_CL_0000233_naive_chr10_20391413_GA_G_cs_1	2140	0.00814324105081954	-5.413519292989	1	IC31	ICA	integrated	CL_0000233_naive	chr10	1.8937876619481e-08	0.779177621445833	1	2.94117647058824e-10	7	284	865	FALSE	FALSE	0.981887836784458	0.981887836784458	20438661	rs56204849
chr10_20391413_GA_G	IC31_ICA_integrated	chr10_20439028_T_C	chr10_20391413_GA_G	IC31_ICA_integrated_CL_0000233_naive_chr10_20391413_GA_G_cs_1	2141	0.00814324105081954	-5.413519292989	1	IC31	ICA	integrated	CL_0000233_naive	chr10	1.8937876619481e-08	0.779177621445833	1	2.94117647058824e-10	7	284	865	FALSE	FALSE	0.981887836784458	0.981887836784458	20439028	rs56110930
chr10_20391413_GA_G	IC31_ICA_integrated	chr10_20439478_G_C	chr10_20391413_GA_G	IC31_ICA_integrated_CL_0000233_naive_chr10_20391413_GA_G_cs_1	2142	0.00814324105081954	-5.413519292989	1	IC31	ICA	integrated	CL_0000233_naive	chr10	1.8937876619481e-08	0.779177621445833	1	2.94117647058824e-10	7	284	865	FALSE	FALSE	0.981887836784458	0.981887836784458	20439478	rs4495790
chr10_20391413_GA_G	IC31_ICA_integrated	chr10_20439585_G_A	chr10_20391413_GA_G	IC31_ICA_integrated_CL_0000233_naive_chr10_20391413_GA_G_cs_1	2143	0.00814324105081954	-5.413519292989	1	IC31	ICA	integrated	CL_0000233_naive	chr10	1.8937876619481e-08	0.779177621445833	1	2.94117647058824e-10	7	284	865	FALSE	FALSE	0.981887836784458	0.981887836784458	20439585	rs2211145
chr10_20391413_GA_G	IC31_ICA_integrated	chr10_20439598_T_A	chr10_20391413_GA_G	IC31_ICA_integrated_CL_0000233_naive_chr10_20391413_GA_G_cs_1	2144	0.00814324105081954	-5.413519292989	1	IC31	ICA	integrated	CL_0000233_naive	chr10	1.8937876619481e-08	0.779177621445833	1	2.94117647058824e-10	7	284	865	FALSE	FALSE	0.981887836784458	0.981887836784458	20439598	rs144704541
chr10_20391413_GA_G	IC31_ICA_integrated	chr10_20439640_G_C	chr10_20391413_GA_G	IC31_ICA_integrated_CL_0000233_naive_chr10_20391413_GA_G_cs_1	2145	0.00814324105081954	-5.413519292989	1	IC31	ICA	integrated	CL_0000233_naive	chr10	1.8937876619481e-08	0.779177621445833	1	2.94117647058824e-10	7	284	865	FALSE	FALSE	0.981887836784458	0.981887836784458	20439640
chr10_20391413_GA_G	IC31_ICA_integrated	chr10_20439870_G_C	chr10_20391413_GA_G	IC31_ICA_integrated_CL_0000233_naive_chr10_20391413_GA_G_cs_1	2147	0.00814324105081954	-5.413519292989	1	IC31	ICA	integrated	CL_0000233_naive	chr10	1.8937876619481e-08	0.779177621445833	1	2.94117647058824e-10	7	284	865	FALSE	FALSE	0.981887836784458	0.981887836784458	20439870
chr10_20391413_GA_G	IC31_ICA_integrated	chr10_20440263_G_C	chr10_20391413_GA_G	IC31_ICA_integrated_CL_0000233_naive_chr10_20391413_GA_G_cs_1	2149	0.00814324105081954	-5.413519292989	1	IC31	ICA	integrated	CL_0000233_naive	chr10	1.8937876619481e-08	0.779177621445833	1	2.94117647058824e-10	7	284	865	FALSE	FALSE	0.981887836784458	0.981887836784458	20440263
chr10_20391413_GA_G	IC31_ICA_integrated	chr10_20440288_A_G	chr10_20391413_GA_G	IC31_ICA_integrated_CL_0000233_naive_chr10_20391413_GA_G_cs_1	2150	0.00814324105081954	-5.413519292989	1	IC31	ICA	integrated	CL_0000233_naive	chr10	1.8937876619481e-08	0.779177621445833	1	2.94117647058824e-10	7	284	865	FALSE	FALSE	0.981887836784458	0.981887836784458	20440288
chr10_20391413_GA_G	IC31_ICA_integrated	chr10_20440525_T_C	chr10_20391413_GA_G	IC31_ICA_integrated_CL_0000233_naive_chr10_20391413_GA_G_cs_1	2152	0.00814324105081954	-5.413519292989	1	IC31	ICA	integrated	CL_0000233_naive	chr10	1.8937876619481e-08	0.779177621445833	1	2.94117647058824e-10	7	284	865	FALSE	FALSE	0.981887836784458	0.981887836784458	20440525	rs55860970
chr10_20391413_GA_G	IC31_ICA_integrated	chr10_20440827_A_G	chr10_20391413_GA_G	IC31_ICA_integrated_CL_0000233_naive_chr10_20391413_GA_G_cs_1	2154	0.00814324105081954	-5.413519292989	1	IC31	ICA	integrated	CL_0000233_naive	chr10	1.8937876619481e-08	0.779177621445833	1	2.94117647058824e-10	7	284	865	FALSE	FALSE	0.981887836784458	0.981887836784458	20440827	rs531933253
chr10_20391413_GA_G	IC31_ICA_integrated	chr10_20440830_CTTT_C	chr10_20391413_GA_G	IC31_ICA_integrated_CL_0000233_naive_chr10_20391413_GA_G_cs_1	2155	0.00814324105081954	-5.413519292989	1	IC31	ICA	integrated	CL_0000233_naive	chr10	1.8937876619481e-08	0.779177621445833	1	2.94117647058824e-10	7	284	865	FALSE	FALSE	0.981887836784458	0.981887836784458	20440830	rs374136720
chr10_20391413_GA_G	IC31_ICA_integrated	chr10_20440834_C_CA	chr10_20391413_GA_G	IC31_ICA_integrated_CL_0000233_naive_chr10_20391413_GA_G_cs_1	2156	0.00814324105081954	-5.413519292989	1	IC31	ICA	integrated	CL_0000233_naive	chr10	1.8937876619481e-08	0.779177621445833	1	2.94117647058824e-10	7	284	865	FALSE	FALSE	0.981887836784458	0.981887836784458	20440834	rs569631808
chr10_20391413_GA_G	IC31_ICA_integrated	chr10_20440837_GT_G	chr10_20391413_GA_G	IC31_ICA_integrated_CL_0000233_naive_chr10_20391413_GA_G_cs_1	2157	0.00814324105081954	-5.413519292989	1	IC31	ICA	integrated	CL_0000233_naive	chr10	1.8937876619481e-08	0.779177621445833	1	2.94117647058824e-10	7	284	865	FALSE	FALSE	0.981887836784458	0.981887836784458	20440837	rs536623991
chr10_20391413_GA_G	IC31_ICA_integrated	chr10_20440840_C_G	chr10_20391413_GA_G	IC31_ICA_integrated_CL_0000233_naive_chr10_20391413_GA_G_cs_1	2158	0.00814324105081954	-5.413519292989	1	IC31	ICA	integrated	CL_0000233_naive	chr10	1.8937876619481e-08	0.779177621445833	1	2.94117647058824e-10	7	284	865	FALSE	FALSE	0.981887836784458	0.981887836784458	20440840
chr10_20391413_GA_G	IC31_ICA_integrated	chr10_20441055_C_G	chr10_20391413_GA_G	IC31_ICA_integrated_CL_0000233_naive_chr10_20391413_GA_G_cs_1	2161	0.00814324105081954	-5.413519292989	1	IC31	ICA	integrated	CL_0000233_naive	chr10	1.8937876619481e-08	0.779177621445833	1	2.94117647058824e-10	7	284	865	FALSE	FALSE	0.981887836784458	0.981887836784458	20441055	rs146417303
chr10_20391413_GA_G	IC31_ICA_integrated	chr10_20441298_G_A	chr10_20391413_GA_G	IC31_ICA_integrated_CL_0000233_naive_chr10_20391413_GA_G_cs_1	2163	0.00814324105081954	-5.413519292989	1	IC31	ICA	integrated	CL_0000233_naive	chr10	1.8937876619481e-08	0.779177621445833	1	2.94117647058824e-10	7	284	865	FALSE	FALSE	0.981887836784458	0.981887836784458	20441298	rs112162193
chr10_20391413_GA_G	IC31_ICA_integrated	chr10_20441904_C_T	chr10_20391413_GA_G	IC31_ICA_integrated_CL_0000233_naive_chr10_20391413_GA_G_cs_1	2164	0.00345941685302675	-5.06617422623113	1	IC31	ICA	integrated	CL_0000233_naive	chr10	1.8937876619481e-08	0.779177621445833	1	2.94117647058824e-10	7	284	865	FALSE	FALSE	0.981887836784458	0.981887836784458	20441904	rs57254409
chr10_20391413_GA_G	IC31_ICA_integrated	chr10_20441926_G_A	chr10_20391413_GA_G	IC31_ICA_integrated_CL_0000233_naive_chr10_20391413_GA_G_cs_1	2165	0.00345941685302675	-5.06617422623113	1	IC31	ICA	integrated	CL_0000233_naive	chr10	1.8937876619481e-08	0.779177621445833	1	2.94117647058824e-10	7	284	865	FALSE	FALSE	0.981887836784458	0.981887836784458	20441926	rs57307966
chr10_20391413_GA_G	IC31_ICA_integrated	chr10_20441932_G_A	chr10_20391413_GA_G	IC31_ICA_integrated_CL_0000233_naive_chr10_20391413_GA_G_cs_1	2166	0.00345941685302675	-5.06617422623113	1	IC31	ICA	integrated	CL_0000233_naive	chr10	1.8937876619481e-08	0.779177621445833	1	2.94117647058824e-10	7	284	865	FALSE	FALSE	0.981887836784458	0.981887836784458	20441932
chr10_20391413_GA_G	IC31_ICA_integrated	chr10_20462860_G_T	chr10_20391413_GA_G	IC31_ICA_integrated_CL_0000233_naive_chr10_20391413_GA_G_cs_1	2216	0.00532552705689127	-5.29634517356774	1	IC31	ICA	integrated	CL_0000233_naive	chr10	1.8937876619481e-08	0.779177621445833	1	2.94117647058824e-10	7	284	865	FALSE	FALSE	0.981887836784458	0.981887836784458	20462860	rs146050786
chr10_20391413_GA_G	IC31_ICA_integrated	chr10_20464970_G_A	chr10_20391413_GA_G	IC31_ICA_integrated_CL_0000233_naive_chr10_20391413_GA_G_cs_1	2227	0.00496972348407343	-5.18292313690809	1	IC31	ICA	integrated	CL_0000233_naive	chr10	1.8937876619481e-08	0.779177621445833	1	2.94117647058824e-10	7	284	865	FALSE	FALSE	0.981887836784458	0.981887836784458	20464970	rs57283115
chr10_20391413_GA_G	IC31_ICA_integrated	chr10_20465402_G_A	chr10_20391413_GA_G	IC31_ICA_integrated_CL_0000233_naive_chr10_20391413_GA_G_cs_1	2232	0.00602853774894518	-5.31000736485724	1	IC31	ICA	integrated	CL_0000233_naive	chr10	1.8937876619481e-08	0.779177621445833	1	2.94117647058824e-10	7	284	865	FALSE	FALSE	0.981887836784458	0.981887836784458	20465402	rs55799429
chr10_20391413_GA_G	IC31_ICA_integrated	chr10_20467206_CCTAT_C	chr10_20391413_GA_G	IC31_ICA_integrated_CL_0000233_naive_chr10_20391413_GA_G_cs_1	2246	0.00602853774894518	-5.31000736485724	1	IC31	ICA	integrated	CL_0000233_naive	chr10	1.8937876619481e-08	0.779177621445833	1	2.94117647058824e-10	7	284	865	FALSE	FALSE	0.981887836784458	0.981887836784458	20467206	rs60115033; rs796303544
chr10_20391413_GA_G	IC31_ICA_integrated	chr10_20470400_T_G	chr10_20391413_GA_G	IC31_ICA_integrated_CL_0000233_naive_chr10_20391413_GA_G_cs_1	2257	0.00602853774894518	-5.31000736485724	1	IC31	ICA	integrated	CL_0000233_naive	chr10	1.8937876619481e-08	0.779177621445833	1	2.94117647058824e-10	7	284	865	FALSE	FALSE	0.981887836784458	0.981887836784458	20470400
chr10_20391413_GA_G	IC31_ICA_integrated	chr10_20473253_AT_A	chr10_20391413_GA_G	IC31_ICA_integrated_CL_0000233_naive_chr10_20391413_GA_G_cs_1	2276	0.00602853774894518	-5.31000736485724	1	IC31	ICA	integrated	CL_0000233_naive	chr10	1.8937876619481e-08	0.779177621445833	1	2.94117647058824e-10	7	284	865	FALSE	FALSE	0.981887836784458	0.981887836784458	20473253	rs143787414
chr10_20391413_GA_G	IC31_ICA_integrated	chr10_20473385_T_C	chr10_20391413_GA_G	IC31_ICA_integrated_CL_0000233_naive_chr10_20391413_GA_G_cs_1	2277	0.0109026029568928	-5.47181491196427	1	IC31	ICA	integrated	CL_0000233_naive	chr10	1.8937876619481e-08	0.779177621445833	1	2.94117647058824e-10	7	284	865	FALSE	FALSE	0.981887836784458	0.981887836784458	20473385	rs11012067
chr10_20391413_GA_G	IC31_ICA_integrated	chr10_20474260_TA_TAA	chr10_20391413_GA_G	IC31_ICA_integrated_CL_0000233_naive_chr10_20391413_GA_G_cs_1	2281	0.00763083221610539	-5.40547269482653	1	IC31	ICA	integrated	CL_0000233_naive	chr10	1.8937876619481e-08	0.779177621445833	1	2.94117647058824e-10	7	284	865	FALSE	FALSE	0.981887836784458	0.981887836784458	20474260
chr10_20391413_GA_G	IC31_ICA_integrated	chr10_20476128_G_T	chr10_20391413_GA_G	IC31_ICA_integrated_CL_0000233_naive_chr10_20391413_GA_G_cs_1	2290	0.00602853774894518	-5.31000736485724	1	IC31	ICA	integrated	CL_0000233_naive	chr10	1.8937876619481e-08	0.779177621445833	1	2.94117647058824e-10	7	284	865	FALSE	FALSE	0.981887836784458	0.981887836784458	20476128	rs55854865
chr10_20391413_GA_G	IC31_ICA_integrated	chr10_20476903_G_A	chr10_20391413_GA_G	IC31_ICA_integrated_CL_0000233_naive_chr10_20391413_GA_G_cs_1	2296	0.0109026029568928	-5.47181491196427	1	IC31	ICA	integrated	CL_0000233_naive	chr10	1.8937876619481e-08	0.779177621445833	1	2.94117647058824e-10	7	284	865	FALSE	FALSE	0.981887836784458	0.981887836784458	20476903	rs67708827
chr10_20391413_GA_G	IC31_ICA_integrated	chr10_20477100_T_C	chr10_20391413_GA_G	IC31_ICA_integrated_CL_0000233_naive_chr10_20391413_GA_G_cs_1	2299	0.00433621729838474	-5.19492827219569	1	IC31	ICA	integrated	CL_0000233_naive	chr10	1.8937876619481e-08	0.779177621445833	1	2.94117647058824e-10	7	284	865	FALSE	FALSE	0.981887836784458	0.981887836784458	20477100	rs112699190
chr10_20391413_GA_G	IC31_ICA_integrated	chr10_20478853_G_A	chr10_20391413_GA_G	IC31_ICA_integrated_CL_0000233_naive_chr10_20391413_GA_G_cs_1	2307	0.00602853774894518	-5.31000736485724	1	IC31	ICA	integrated	CL_0000233_naive	chr10	1.8937876619481e-08	0.779177621445833	1	2.94117647058824e-10	7	284	865	FALSE	FALSE	0.981887836784458	0.981887836784458	20478853	rs35381385
chr10_20391413_GA_G	IC31_ICA_integrated	chr10_20482233_T_G	chr10_20391413_GA_G	IC31_ICA_integrated_CL_0000233_naive_chr10_20391413_GA_G_cs_1	2332	0.00357535644188656	-5.07838250224352	1	IC31	ICA	integrated	CL_0000233_naive	chr10	1.8937876619481e-08	0.779177621445833	1	2.94117647058824e-10	7	284	865	FALSE	FALSE	0.981887836784458	0.981887836784458	20482233	rs72791237
chr10_3140399_A_G	IC32_ICA_integrated	chr10_3123616_G_A	chr10_3140399_A_G	IC32_ICA_integrated_CL_0000236_naive_chr10_3140399_A_G_cs_1	1924	0.0446773878978249	5.09167142948404	1	IC32	ICA	integrated	CL_0000236_naive	chr10	4.25490697377425e-08	0.70788681748242	1	2.94117647058824e-10	3	84	1027	FALSE	FALSE	0.85529691159172	0.85529691159172	3123616	rs9423471
chr10_3140399_A_G	IC32_ICA_integrated	chr10_3124842_A_AC	chr10_3140399_A_G	IC32_ICA_integrated_CL_0000236_naive_chr10_3140399_A_G_cs_1	1942	0.0156854232862451	4.86259112725469	1	IC32	ICA	integrated	CL_0000236_naive	chr10	4.25490697377425e-08	0.70788681748242	1	2.94117647058824e-10	3	84	1027	FALSE	FALSE	0.85529691159172	0.85529691159172	3124842	rs5782685; rs397777261
chr10_3140399_A_G	IC32_ICA_integrated	chr10_3125271_T_C	chr10_3140399_A_G	IC32_ICA_integrated_CL_0000236_naive_chr10_3140399_A_G_cs_1	1944	0.00733292265138341	4.70598325532495	1	IC32	ICA	integrated	CL_0000236_naive	chr10	4.25490697377425e-08	0.70788681748242	1	2.94117647058824e-10	3	84	1027	FALSE	FALSE	0.85529691159172	0.85529691159172	3125271	rs2306309
chr10_3140399_A_G	IC32_ICA_integrated	chr10_3125710_G_A	chr10_3140399_A_G	IC32_ICA_integrated_CL_0000236_naive_chr10_3140399_A_G_cs_1	1949	0.00733292265138341	4.70598325532495	1	IC32	ICA	integrated	CL_0000236_naive	chr10	4.25490697377425e-08	0.70788681748242	1	2.94117647058824e-10	3	84	1027	FALSE	FALSE	0.85529691159172	0.85529691159172	3125710	rs7091322
chr10_3140399_A_G	IC32_ICA_integrated	chr10_3126239_A_C	chr10_3140399_A_G	IC32_ICA_integrated_CL_0000236_naive_chr10_3140399_A_G_cs_1	1953	0.00733292265138341	4.70598325532495	1	IC32	ICA	integrated	CL_0000236_naive	chr10	4.25490697377425e-08	0.70788681748242	1	2.94117647058824e-10	3	84	1027	FALSE	FALSE	0.85529691159172	0.85529691159172	3126239	rs9423691
chr10_3140399_A_G	IC32_ICA_integrated	chr10_3128018_AC_A	chr10_3140399_A_G	IC32_ICA_integrated_CL_0000236_naive_chr10_3140399_A_G_cs_1	1967	0.00733292265138341	4.70598325532495	1	IC32	ICA	integrated	CL_0000236_naive	chr10	4.25490697377425e-08	0.70788681748242	1	2.94117647058824e-10	3	84	1027	FALSE	FALSE	0.85529691159172	0.85529691159172	3128018	rs5782686; rs796106606
chr10_3140399_A_G	IC32_ICA_integrated	chr10_3128579_C_T	chr10_3140399_A_G	IC32_ICA_integrated_CL_0000236_naive_chr10_3140399_A_G_cs_1	1975	0.00733292265138341	4.70598325532495	1	IC32	ICA	integrated	CL_0000236_naive	chr10	4.25490697377425e-08	0.70788681748242	1	2.94117647058824e-10	3	84	1027	FALSE	FALSE	0.85529691159172	0.85529691159172	3128579	rs2279203
chr10_3140399_A_G	IC32_ICA_integrated	chr10_3128790_C_T	chr10_3140399_A_G	IC32_ICA_integrated_CL_0000236_naive_chr10_3140399_A_G_cs_1	1978	0.00733292265138341	4.70598325532495	1	IC32	ICA	integrated	CL_0000236_naive	chr10	4.25490697377425e-08	0.70788681748242	1	2.94117647058824e-10	3	84	1027	FALSE	FALSE	0.85529691159172	0.85529691159172	3128790	rs2279206
chr10_3140399_A_G	IC32_ICA_integrated	chr10_3128825_G_A	chr10_3140399_A_G	IC32_ICA_integrated_CL_0000236_naive_chr10_3140399_A_G_cs_1	1979	0.00733292265138341	4.70598325532495	1	IC32	ICA	integrated	CL_0000236_naive	chr10	4.25490697377425e-08	0.70788681748242	1	2.94117647058824e-10	3	84	1027	FALSE	FALSE	0.85529691159172	0.85529691159172	3128825	rs2279207
chr10_3140399_A_G	IC32_ICA_integrated	chr10_3130037_G_A	chr10_3140399_A_G	IC32_ICA_integrated_CL_0000236_naive_chr10_3140399_A_G_cs_1	1987	0.00733292265138341	4.70598325532495	1	IC32	ICA	integrated	CL_0000236_naive	chr10	4.25490697377425e-08	0.70788681748242	1	2.94117647058824e-10	3	84	1027	FALSE	FALSE	0.85529691159172	0.85529691159172	3130037	rs4598574
chr10_3140399_A_G	IC32_ICA_integrated	chr10_3130215_CTTGT_C	chr10_3140399_A_G	IC32_ICA_integrated_CL_0000236_naive_chr10_3140399_A_G_cs_1	1991	0.00733292265138341	4.70598325532495	1	IC32	ICA	integrated	CL_0000236_naive	chr10	4.25490697377425e-08	0.70788681748242	1	2.94117647058824e-10	3	84	1027	FALSE	FALSE	0.85529691159172	0.85529691159172	3130215	rs113576293; rs10578594
chr10_3140399_A_G	IC32_ICA_integrated	chr10_3130853_A_G	chr10_3140399_A_G	IC32_ICA_integrated_CL_0000236_naive_chr10_3140399_A_G_cs_1	2003	0.00733292265138341	4.70598325532495	1	IC32	ICA	integrated	CL_0000236_naive	chr10	4.25490697377425e-08	0.70788681748242	1	2.94117647058824e-10	3	84	1027	FALSE	FALSE	0.85529691159172	0.85529691159172	3130853	rs4589191
chr10_3140399_A_G	IC32_ICA_integrated	chr10_3130880_A_C	chr10_3140399_A_G	IC32_ICA_integrated_CL_0000236_naive_chr10_3140399_A_G_cs_1	2005	0.00733292265138341	4.70598325532495	1	IC32	ICA	integrated	CL_0000236_naive	chr10	4.25490697377425e-08	0.70788681748242	1	2.94117647058824e-10	3	84	1027	FALSE	FALSE	0.85529691159172	0.85529691159172	3130880	rs71502283
chr10_3140399_A_G	IC32_ICA_integrated	chr10_3130881_T_TCA	chr10_3140399_A_G	IC32_ICA_integrated_CL_0000236_naive_chr10_3140399_A_G_cs_1	2006	0.00733292265138341	4.70598325532495	1	IC32	ICA	integrated	CL_0000236_naive	chr10	4.25490697377425e-08	0.70788681748242	1	2.94117647058824e-10	3	84	1027	FALSE	FALSE	0.85529691159172	0.85529691159172	3130881	rs559301713
chr10_3140399_A_G	IC32_ICA_integrated	chr10_3130883_T_A	chr10_3140399_A_G	IC32_ICA_integrated_CL_0000236_naive_chr10_3140399_A_G_cs_1	2007	0.00733292265138341	4.70598325532495	1	IC32	ICA	integrated	CL_0000236_naive	chr10	4.25490697377425e-08	0.70788681748242	1	2.94117647058824e-10	3	84	1027	FALSE	FALSE	0.85529691159172	0.85529691159172	3130883
chr10_3140399_A_G	IC32_ICA_integrated	chr10_3130884_T_A	chr10_3140399_A_G	IC32_ICA_integrated_CL_0000236_naive_chr10_3140399_A_G_cs_1	2008	0.00733292265138341	4.70598325532495	1	IC32	ICA	integrated	CL_0000236_naive	chr10	4.25490697377425e-08	0.70788681748242	1	2.94117647058824e-10	3	84	1027	FALSE	FALSE	0.85529691159172	0.85529691159172	3130884	rs556398577
chr10_3140399_A_G	IC32_ICA_integrated	chr10_3130888_T_A	chr10_3140399_A_G	IC32_ICA_integrated_CL_0000236_naive_chr10_3140399_A_G_cs_1	2010	0.00733292265138341	4.70598325532495	1	IC32	ICA	integrated	CL_0000236_naive	chr10	4.25490697377425e-08	0.70788681748242	1	2.94117647058824e-10	3	84	1027	FALSE	FALSE	0.85529691159172	0.85529691159172	3130888	rs542181217
chr10_3140399_A_G	IC32_ICA_integrated	chr10_3130891_T_A	chr10_3140399_A_G	IC32_ICA_integrated_CL_0000236_naive_chr10_3140399_A_G_cs_1	2011	0.00733292265138341	4.70598325532495	1	IC32	ICA	integrated	CL_0000236_naive	chr10	4.25490697377425e-08	0.70788681748242	1	2.94117647058824e-10	3	84	1027	FALSE	FALSE	0.85529691159172	0.85529691159172	3130891	rs561857197
chr10_3140399_A_G	IC32_ICA_integrated	chr10_3130892_T_A	chr10_3140399_A_G	IC32_ICA_integrated_CL_0000236_naive_chr10_3140399_A_G_cs_1	2012	0.00733292265138341	4.70598325532495	1	IC32	ICA	integrated	CL_0000236_naive	chr10	4.25490697377425e-08	0.70788681748242	1	2.94117647058824e-10	3	84	1027	FALSE	FALSE	0.85529691159172	0.85529691159172	3130892	rs527528589
chr10_3140399_A_G	IC32_ICA_integrated	chr10_3130893_CTG_C	chr10_3140399_A_G	IC32_ICA_integrated_CL_0000236_naive_chr10_3140399_A_G_cs_1	2013	0.00733292265138341	4.70598325532495	1	IC32	ICA	integrated	CL_0000236_naive	chr10	4.25490697377425e-08	0.70788681748242	1	2.94117647058824e-10	3	84	1027	FALSE	FALSE	0.85529691159172	0.85529691159172	3130893	rs571356269
chr10_3140399_A_G	IC32_ICA_integrated	chr10_3130897_G_T	chr10_3140399_A_G	IC32_ICA_integrated_CL_0000236_naive_chr10_3140399_A_G_cs_1	2014	0.00733292265138341	4.70598325532495	1	IC32	ICA	integrated	CL_0000236_naive	chr10	4.25490697377425e-08	0.70788681748242	1	2.94117647058824e-10	3	84	1027	FALSE	FALSE	0.85529691159172	0.85529691159172	3130897	rs59342418
chr10_3140399_A_G	IC32_ICA_integrated	chr10_3130900_A_T	chr10_3140399_A_G	IC32_ICA_integrated_CL_0000236_naive_chr10_3140399_A_G_cs_1	2015	0.00767000053380373	4.70968426116833	1	IC32	ICA	integrated	CL_0000236_naive	chr10	4.25490697377425e-08	0.70788681748242	1	2.94117647058824e-10	3	84	1027	FALSE	FALSE	0.85529691159172	0.85529691159172	3130900	rs71502284
chr10_3140399_A_G	IC32_ICA_integrated	chr10_3130903_T_C	chr10_3140399_A_G	IC32_ICA_integrated_CL_0000236_naive_chr10_3140399_A_G_cs_1	2016	0.00767000053380373	4.70968426116833	1	IC32	ICA	integrated	CL_0000236_naive	chr10	4.25490697377425e-08	0.70788681748242	1	2.94117647058824e-10	3	84	1027	FALSE	FALSE	0.85529691159172	0.85529691159172	3130903	rs4391742
chr10_3140399_A_G	IC32_ICA_integrated	chr10_3132832_T_C	chr10_3140399_A_G	IC32_ICA_integrated_CL_0000236_naive_chr10_3140399_A_G_cs_1	2027	0.0175832209091196	4.94059085824703	1	IC32	ICA	integrated	CL_0000236_naive	chr10	4.25490697377425e-08	0.70788681748242	1	2.94117647058824e-10	3	84	1027	FALSE	FALSE	0.85529691159172	0.85529691159172	3132832	rs9423485
chr10_3140399_A_G	IC32_ICA_integrated	chr10_3134051_C_T	chr10_3140399_A_G	IC32_ICA_integrated_CL_0000236_naive_chr10_3140399_A_G_cs_1	2038	0.0175832209091196	4.94059085824703	1	IC32	ICA	integrated	CL_0000236_naive	chr10	4.25490697377425e-08	0.70788681748242	1	2.94117647058824e-10	3	84	1027	FALSE	FALSE	0.85529691159172	0.85529691159172	3134051	rs9423697
chr10_3140399_A_G	IC32_ICA_integrated	chr10_3135049_C_T	chr10_3140399_A_G	IC32_ICA_integrated_CL_0000236_naive_chr10_3140399_A_G_cs_1	2050	0.0175832209091196	4.94059085824703	1	IC32	ICA	integrated	CL_0000236_naive	chr10	4.25490697377425e-08	0.70788681748242	1	2.94117647058824e-10	3	84	1027	FALSE	FALSE	0.85529691159172	0.85529691159172	3135049	rs9423489
chr10_3140399_A_G	IC32_ICA_integrated	chr10_3136191_G_T	chr10_3140399_A_G	IC32_ICA_integrated_CL_0000236_naive_chr10_3140399_A_G_cs_1	2063	0.0297355791306489	5.05703716493011	1	IC32	ICA	integrated	CL_0000236_naive	chr10	4.25490697377425e-08	0.70788681748242	1	2.94117647058824e-10	3	84	1027	FALSE	FALSE	0.85529691159172	0.85529691159172	3136191
chr10_3140399_A_G	IC32_ICA_integrated	chr10_3136250_C_A	chr10_3140399_A_G	IC32_ICA_integrated_CL_0000236_naive_chr10_3140399_A_G_cs_1	2065	0.0388761101683098	5.11675416197109	1	IC32	ICA	integrated	CL_0000236_naive	chr10	4.25490697377425e-08	0.70788681748242	1	2.94117647058824e-10	3	84	1027	FALSE	FALSE	0.85529691159172	0.85529691159172	3136250
chr10_3140399_A_G	IC32_ICA_integrated	chr10_3136716_T_C	chr10_3140399_A_G	IC32_ICA_integrated_CL_0000236_naive_chr10_3140399_A_G_cs_1	2072	0.0297355791306489	5.05703716493011	1	IC32	ICA	integrated	CL_0000236_naive	chr10	4.25490697377425e-08	0.70788681748242	1	2.94117647058824e-10	3	84	1027	FALSE	FALSE	0.85529691159172	0.85529691159172	3136716	rs542
chr10_3140399_A_G	IC32_ICA_integrated	chr10_3136887_AAAGATTAGCAAAATATTTTTATAGGGATCACTG_A	chr10_3140399_A_G	IC32_ICA_integrated_CL_0000236_naive_chr10_3140399_A_G_cs_1	2077	0.0297355791306489	5.05703716493011	1	IC32	ICA	integrated	CL_0000236_naive	chr10	4.25490697377425e-08	0.70788681748242	1	2.94117647058824e-10	3	84	1027	FALSE	FALSE	0.85529691159172	0.85529691159172	3136887	rs142295836; rs6143747
chr10_3140399_A_G	IC32_ICA_integrated	chr10_3136997_A_G	chr10_3140399_A_G	IC32_ICA_integrated_CL_0000236_naive_chr10_3140399_A_G_cs_1	2078	0.0297355791306489	5.05703716493011	1	IC32	ICA	integrated	CL_0000236_naive	chr10	4.25490697377425e-08	0.70788681748242	1	2.94117647058824e-10	3	84	1027	FALSE	FALSE	0.85529691159172	0.85529691159172	3136997	rs2388563
chr10_3140399_A_G	IC32_ICA_integrated	chr10_3138497_C_A	chr10_3140399_A_G	IC32_ICA_integrated_CL_0000236_naive_chr10_3140399_A_G_cs_1	2096	0.0227734258133133	4.99511257321526	1	IC32	ICA	integrated	CL_0000236_naive	chr10	4.25490697377425e-08	0.70788681748242	1	2.94117647058824e-10	3	84	1027	FALSE	FALSE	0.85529691159172	0.85529691159172	3138497	rs2388558
chr10_3140399_A_G	IC32_ICA_integrated	chr10_3139821_C_T	chr10_3140399_A_G	IC32_ICA_integrated_CL_0000236_naive_chr10_3140399_A_G_cs_1	2108	0.0227734258133133	4.99511257321526	1	IC32	ICA	integrated	CL_0000236_naive	chr10	4.25490697377425e-08	0.70788681748242	1	2.94117647058824e-10	3	84	1027	FALSE	FALSE	0.85529691159172	0.85529691159172	3139821	rs4880594
chr10_3140399_A_G	IC32_ICA_integrated	chr10_3139834_C_G	chr10_3140399_A_G	IC32_ICA_integrated_CL_0000236_naive_chr10_3140399_A_G_cs_1	2109	0.0227734258133133	4.99511257321526	1	IC32	ICA	integrated	CL_0000236_naive	chr10	4.25490697377425e-08	0.70788681748242	1	2.94117647058824e-10	3	84	1027	FALSE	FALSE	0.85529691159172	0.85529691159172	3139834	rs4880595
chr10_3140399_A_G	IC32_ICA_integrated	chr10_3140380_G_T	chr10_3140399_A_G	IC32_ICA_integrated_CL_0000236_naive_chr10_3140399_A_G_cs_1	2110	0.0227734258133133	4.99511257321526	1	IC32	ICA	integrated	CL_0000236_naive	chr10	4.25490697377425e-08	0.70788681748242	1	2.94117647058824e-10	3	84	1027	FALSE	FALSE	0.85529691159172	0.85529691159172	3140380
chr10_3140399_A_G	IC32_ICA_integrated	chr10_3140399_A_G	chr10_3140399_A_G	IC32_ICA_integrated_CL_0000236_naive_chr10_3140399_A_G_cs_1	2111	0.408531804767355	5.56936621174196	1	IC32	ICA	integrated	CL_0000236_naive	chr10	4.25490697377425e-08	0.70788681748242	1	2.94117647058824e-10	3	84	1027	FALSE	FALSE	0.85529691159172	0.85529691159172	3140399	rs9423701
chr10_3140399_A_G	IC32_ICA_integrated	chr10_3143201_A_G	chr10_3140399_A_G	IC32_ICA_integrated_CL_0000236_naive_chr10_3140399_A_G_cs_1	2122	0.0796484839387481	5.24706121058117	1	IC32	ICA	integrated	CL_0000236_naive	chr10	4.25490697377425e-08	0.70788681748242	1	2.94117647058824e-10	3	84	1027	FALSE	FALSE	0.85529691159172	0.85529691159172	3143201	rs4881110
chr10_3420948_C_G	IC149_ICA_integrated	chr10_3420942_G_A	chr10_3420948_C_G	IC149_ICA_integrated_CL_0002057_naive_chr10_3420948_C_G_cs_1	2281	0.167457049785071	5.35632140247612	1	IC149	ICA	integrated	CL_0002057_naive	chr10	3.44965400291224e-08	0.0630659213179132	1	2.94117647058824e-10	1	25	977	FALSE	FALSE	0.744925750428065	0.744925750428065	3420942	rs74369949
chr10_3420948_C_G	IC149_ICA_integrated	chr10_3420948_C_G	chr10_3420948_C_G	IC149_ICA_integrated_CL_0002057_naive_chr10_3420948_C_G_cs_1	2282	0.645000076938579	5.59662625972707	1	IC149	ICA	integrated	CL_0002057_naive	chr10	3.44965400291224e-08	0.0630659213179132	1	2.94117647058824e-10	1	25	977	FALSE	FALSE	0.744925750428065	0.744925750428065	3420948	rs77122424
chr10_3420948_C_G	IC149_ICA_integrated	chr10_3420958_A_G	chr10_3420948_C_G	IC149_ICA_integrated_CL_0002057_naive_chr10_3420948_C_G_cs_1	2283	0.189320505757933	5.37752785348273	1	IC149	ICA	integrated	CL_0002057_naive	chr10	3.44965400291224e-08	0.0630659213179132	1	2.94117647058824e-10	1	25	977	FALSE	FALSE	0.744925750428065	0.744925750428065	3420958	rs61830480
chr10_4960010_G_A	Cluster_12095_funcExplorer_separate_CL_0002057_LPS_24h	chr10_4960010_G_A	chr10_4960010_G_A	Cluster_12095_funcExplorer_separate_CL_0002057_LPS_24h_chr10_4960010_G_A_cs_1	1914	0.0891904825296607	-6.35495886613855	1	Cluster_12095	funcExplorer	separate	CL_0002057_LPS_24h	chr10	9.3356949692247e-10	0.0249087074080177	0.530949021952176	3.37837837837838e-10	8	403	8	FALSE	FALSE	4.98204458849096e-14	4.98204458849096e-14	4960010
chr10_4960010_G_A	Cluster_12095_funcExplorer_separate_CL_0002057_LPS_24h	chr10_4960700_C_T	chr10_4960010_G_A	Cluster_12095_funcExplorer_separate_CL_0002057_LPS_24h_chr10_4960010_G_A_cs_1	1919	0.0498529714627365	-6.20657907286846	1	Cluster_12095	funcExplorer	separate	CL_0002057_LPS_24h	chr10	9.3356949692247e-10	0.0249087074080177	0.530949021952176	3.37837837837838e-10	8	403	8	FALSE	FALSE	4.98204458849096e-14	4.98204458849096e-14	4960700
chr10_4960010_G_A	Cluster_12095_funcExplorer_separate_CL_0002057_LPS_24h	chr10_4960734_C_G	chr10_4960010_G_A	Cluster_12095_funcExplorer_separate_CL_0002057_LPS_24h_chr10_4960010_G_A_cs_1	1920	0.0498529714627365	-6.20657907286846	1	Cluster_12095	funcExplorer	separate	CL_0002057_LPS_24h	chr10	9.3356949692247e-10	0.0249087074080177	0.530949021952176	3.37837837837838e-10	8	403	8	FALSE	FALSE	4.98204458849096e-14	4.98204458849096e-14	4960734
chr10_4960010_G_A	Cluster_12095_funcExplorer_separate_CL_0002057_LPS_24h	chr10_4960956_C_T	chr10_4960010_G_A	Cluster_12095_funcExplorer_separate_CL_0002057_LPS_24h_chr10_4960010_G_A_cs_1	1922	0.0498529714627365	-6.20657907286846	1	Cluster_12095	funcExplorer	separate	CL_0002057_LPS_24h	chr10	9.3356949692247e-10	0.0249087074080177	0.530949021952176	3.37837837837838e-10	8	403	8	FALSE	FALSE	4.98204458849096e-14	4.98204458849096e-14	4960956	rs2904800
chr10_4960010_G_A	Cluster_12095_funcExplorer_separate_CL_0002057_LPS_24h	chr10_4961163_C_T	chr10_4960010_G_A	Cluster_12095_funcExplorer_separate_CL_0002057_LPS_24h_chr10_4960010_G_A_cs_1	1924	0.0498529714627365	-6.20657907286846	1	Cluster_12095	funcExplorer	separate	CL_0002057_LPS_24h	chr10	9.3356949692247e-10	0.0249087074080177	0.530949021952176	3.37837837837838e-10	8	403	8	FALSE	FALSE	4.98204458849096e-14	4.98204458849096e-14	4961163	rs2904803
chr10_4960010_G_A	Cluster_12095_funcExplorer_separate_CL_0002057_LPS_24h	chr10_4961919_A_T	chr10_4960010_G_A	Cluster_12095_funcExplorer_separate_CL_0002057_LPS_24h_chr10_4960010_G_A_cs_1	1930	0.024140119494084	-6.03910969684737	1	Cluster_12095	funcExplorer	separate	CL_0002057_LPS_24h	chr10	9.3356949692247e-10	0.0249087074080177	0.530949021952176	3.37837837837838e-10	8	403	8	FALSE	FALSE	4.98204458849096e-14	4.98204458849096e-14	4961919	rs11252853
chr10_4960010_G_A	Cluster_12095_funcExplorer_separate_CL_0002057_LPS_24h	chr10_4963663_A_G	chr10_4960010_G_A	Cluster_12095_funcExplorer_separate_CL_0002057_LPS_24h_chr10_4960010_G_A_cs_1	1940	0.0120481059301644	-5.88120044887426	1	Cluster_12095	funcExplorer	separate	CL_0002057_LPS_24h	chr10	9.3356949692247e-10	0.0249087074080177	0.530949021952176	3.37837837837838e-10	8	403	8	FALSE	FALSE	4.98204458849096e-14	4.98204458849096e-14	4963663	rs12773163
chr10_4960010_G_A	Cluster_12095_funcExplorer_separate_CL_0002057_LPS_24h	chr10_4964173_G_A	chr10_4960010_G_A	Cluster_12095_funcExplorer_separate_CL_0002057_LPS_24h_chr10_4960010_G_A_cs_1	1944	0.024140119494084	-6.03910969684737	1	Cluster_12095	funcExplorer	separate	CL_0002057_LPS_24h	chr10	9.3356949692247e-10	0.0249087074080177	0.530949021952176	3.37837837837838e-10	8	403	8	FALSE	FALSE	4.98204458849096e-14	4.98204458849096e-14	4964173	rs7074155
chr10_4960010_G_A	Cluster_12095_funcExplorer_separate_CL_0002057_LPS_24h	chr10_4964970_T_G	chr10_4960010_G_A	Cluster_12095_funcExplorer_separate_CL_0002057_LPS_24h_chr10_4960010_G_A_cs_1	1946	0.024140119494084	-6.03910969684737	1	Cluster_12095	funcExplorer	separate	CL_0002057_LPS_24h	chr10	9.3356949692247e-10	0.0249087074080177	0.530949021952176	3.37837837837838e-10	8	403	8	FALSE	FALSE	4.98204458849096e-14	4.98204458849096e-14	4964970	rs3925947
chr10_4960010_G_A	Cluster_12095_funcExplorer_separate_CL_0002057_LPS_24h	chr10_4966617_A_C	chr10_4960010_G_A	Cluster_12095_funcExplorer_separate_CL_0002057_LPS_24h_chr10_4960010_G_A_cs_1	1950	0.024140119494084	-6.03910969684737	1	Cluster_12095	funcExplorer	separate	CL_0002057_LPS_24h	chr10	9.3356949692247e-10	0.0249087074080177	0.530949021952176	3.37837837837838e-10	8	403	8	FALSE	FALSE	4.98204458849096e-14	4.98204458849096e-14	4966617	rs12264914
chr10_4960010_G_A	Cluster_12095_funcExplorer_separate_CL_0002057_LPS_24h	chr10_4967155_A_G	chr10_4960010_G_A	Cluster_12095_funcExplorer_separate_CL_0002057_LPS_24h_chr10_4960010_G_A_cs_1	1952	0.024140119494084	-6.03910969684737	1	Cluster_12095	funcExplorer	separate	CL_0002057_LPS_24h	chr10	9.3356949692247e-10	0.0249087074080177	0.530949021952176	3.37837837837838e-10	8	403	8	FALSE	FALSE	4.98204458849096e-14	4.98204458849096e-14	4967155	rs4445550
chr10_4960010_G_A	Cluster_12095_funcExplorer_separate_CL_0002057_LPS_24h	chr10_4967257_T_C	chr10_4960010_G_A	Cluster_12095_funcExplorer_separate_CL_0002057_LPS_24h_chr10_4960010_G_A_cs_1	1954	0.024140119494084	-6.03910969684737	1	Cluster_12095	funcExplorer	separate	CL_0002057_LPS_24h	chr10	9.3356949692247e-10	0.0249087074080177	0.530949021952176	3.37837837837838e-10	8	403	8	FALSE	FALSE	4.98204458849096e-14	4.98204458849096e-14	4967257	rs7076886
chr10_4960010_G_A	Cluster_12095_funcExplorer_separate_CL_0002057_LPS_24h	chr10_4967902_G_T	chr10_4960010_G_A	Cluster_12095_funcExplorer_separate_CL_0002057_LPS_24h_chr10_4960010_G_A_cs_1	1957	0.0112351670992357	-5.84260063063235	1	Cluster_12095	funcExplorer	separate	CL_0002057_LPS_24h	chr10	9.3356949692247e-10	0.0249087074080177	0.530949021952176	3.37837837837838e-10	8	403	8	FALSE	FALSE	4.98204458849096e-14	4.98204458849096e-14	4967902	rs1468084
chr10_4960010_G_A	Cluster_12095_funcExplorer_separate_CL_0002057_LPS_24h	chr10_4967903_A_G	chr10_4960010_G_A	Cluster_12095_funcExplorer_separate_CL_0002057_LPS_24h_chr10_4960010_G_A_cs_1	1958	0.0112351670992357	-5.84260063063235	1	Cluster_12095	funcExplorer	separate	CL_0002057_LPS_24h	chr10	9.3356949692247e-10	0.0249087074080177	0.530949021952176	3.37837837837838e-10	8	403	8	FALSE	FALSE	4.98204458849096e-14	4.98204458849096e-14	4967903	rs1468085
chr10_4960010_G_A	Cluster_12095_funcExplorer_separate_CL_0002057_LPS_24h	chr10_4968127_G_A	chr10_4960010_G_A	Cluster_12095_funcExplorer_separate_CL_0002057_LPS_24h_chr10_4960010_G_A_cs_1	1959	0.024140119494084	-6.03910969684737	1	Cluster_12095	funcExplorer	separate	CL_0002057_LPS_24h	chr10	9.3356949692247e-10	0.0249087074080177	0.530949021952176	3.37837837837838e-10	8	403	8	FALSE	FALSE	4.98204458849096e-14	4.98204458849096e-14	4968127	rs12264439
chr10_4960010_G_A	Cluster_12095_funcExplorer_separate_CL_0002057_LPS_24h	chr10_4969500_A_G	chr10_4960010_G_A	Cluster_12095_funcExplorer_separate_CL_0002057_LPS_24h_chr10_4960010_G_A_cs_1	1966	0.024140119494084	-6.03910969684737	1	Cluster_12095	funcExplorer	separate	CL_0002057_LPS_24h	chr10	9.3356949692247e-10	0.0249087074080177	0.530949021952176	3.37837837837838e-10	8	403	8	FALSE	FALSE	4.98204458849096e-14	4.98204458849096e-14	4969500	rs7083246
chr10_4960010_G_A	Cluster_12095_funcExplorer_separate_CL_0002057_LPS_24h	chr10_4969510_TG_T	chr10_4960010_G_A	Cluster_12095_funcExplorer_separate_CL_0002057_LPS_24h_chr10_4960010_G_A_cs_1	1967	0.024140119494084	-6.03910969684737	1	Cluster_12095	funcExplorer	separate	CL_0002057_LPS_24h	chr10	9.3356949692247e-10	0.0249087074080177	0.530949021952176	3.37837837837838e-10	8	403	8	FALSE	FALSE	4.98204458849096e-14	4.98204458849096e-14	4969510	rs11330324; rs796067069
chr10_4960010_G_A	Cluster_12095_funcExplorer_separate_CL_0002057_LPS_24h	chr10_4970577_T_C	chr10_4960010_G_A	Cluster_12095_funcExplorer_separate_CL_0002057_LPS_24h_chr10_4960010_G_A_cs_1	1969	0.024140119494084	-6.03910969684737	1	Cluster_12095	funcExplorer	separate	CL_0002057_LPS_24h	chr10	9.3356949692247e-10	0.0249087074080177	0.530949021952176	3.37837837837838e-10	8	403	8	FALSE	FALSE	4.98204458849096e-14	4.98204458849096e-14	4970577	rs12263706
chr10_4960010_G_A	Cluster_12095_funcExplorer_separate_CL_0002057_LPS_24h	chr10_4970839_C_T	chr10_4960010_G_A	Cluster_12095_funcExplorer_separate_CL_0002057_LPS_24h_chr10_4960010_G_A_cs_1	1970	0.024140119494084	-6.03910969684737	1	Cluster_12095	funcExplorer	separate	CL_0002057_LPS_24h	chr10	9.3356949692247e-10	0.0249087074080177	0.530949021952176	3.37837837837838e-10	8	403	8	FALSE	FALSE	4.98204458849096e-14	4.98204458849096e-14	4970839
chr10_4960010_G_A	Cluster_12095_funcExplorer_separate_CL_0002057_LPS_24h	chr10_4970972_A_C	chr10_4960010_G_A	Cluster_12095_funcExplorer_separate_CL_0002057_LPS_24h_chr10_4960010_G_A_cs_1	1971	0.024140119494084	-6.03910969684737	1	Cluster_12095	funcExplorer	separate	CL_0002057_LPS_24h	chr10	9.3356949692247e-10	0.0249087074080177	0.530949021952176	3.37837837837838e-10	8	403	8	FALSE	FALSE	4.98204458849096e-14	4.98204458849096e-14	4970972	rs12263850
chr10_4960010_G_A	Cluster_12095_funcExplorer_separate_CL_0002057_LPS_24h	chr10_4971522_TAA_T	chr10_4960010_G_A	Cluster_12095_funcExplorer_separate_CL_0002057_LPS_24h_chr10_4960010_G_A_cs_1	1973	0.0498529714627365	-6.20657907286846	1	Cluster_12095	funcExplorer	separate	CL_0002057_LPS_24h	chr10	9.3356949692247e-10	0.0249087074080177	0.530949021952176	3.37837837837838e-10	8	403	8	FALSE	FALSE	4.98204458849096e-14	4.98204458849096e-14	4971522	rs10595294; rs530566556
chr10_4960010_G_A	Cluster_12095_funcExplorer_separate_CL_0002057_LPS_24h	chr10_4971580_A_G	chr10_4960010_G_A	Cluster_12095_funcExplorer_separate_CL_0002057_LPS_24h_chr10_4960010_G_A_cs_1	1974	0.024140119494084	-6.03910969684737	1	Cluster_12095	funcExplorer	separate	CL_0002057_LPS_24h	chr10	9.3356949692247e-10	0.0249087074080177	0.530949021952176	3.37837837837838e-10	8	403	8	FALSE	FALSE	4.98204458849096e-14	4.98204458849096e-14	4971580	rs7916500
chr10_4960010_G_A	Cluster_12095_funcExplorer_separate_CL_0002057_LPS_24h	chr10_4971668_A_T	chr10_4960010_G_A	Cluster_12095_funcExplorer_separate_CL_0002057_LPS_24h_chr10_4960010_G_A_cs_1	1976	0.024140119494084	-6.03910969684737	1	Cluster_12095	funcExplorer	separate	CL_0002057_LPS_24h	chr10	9.3356949692247e-10	0.0249087074080177	0.530949021952176	3.37837837837838e-10	8	403	8	FALSE	FALSE	4.98204458849096e-14	4.98204458849096e-14	4971668
chr10_4960010_G_A	Cluster_12095_funcExplorer_separate_CL_0002057_LPS_24h	chr10_4973662_G_A	chr10_4960010_G_A	Cluster_12095_funcExplorer_separate_CL_0002057_LPS_24h_chr10_4960010_G_A_cs_1	1980	0.0241401194940841	-6.03910969684737	1	Cluster_12095	funcExplorer	separate	CL_0002057_LPS_24h	chr10	9.3356949692247e-10	0.0249087074080177	0.530949021952176	3.37837837837838e-10	8	403	8	FALSE	FALSE	4.98204458849096e-14	4.98204458849096e-14	4973662	rs3890593
chr10_4960010_G_A	Cluster_12095_funcExplorer_separate_CL_0002057_LPS_24h	chr10_4973788_A_G	chr10_4960010_G_A	Cluster_12095_funcExplorer_separate_CL_0002057_LPS_24h_chr10_4960010_G_A_cs_1	1981	0.024140119494084	-6.03910969684737	1	Cluster_12095	funcExplorer	separate	CL_0002057_LPS_24h	chr10	9.3356949692247e-10	0.0249087074080177	0.530949021952176	3.37837837837838e-10	8	403	8	FALSE	FALSE	4.98204458849096e-14	4.98204458849096e-14	4973788
chr10_4960010_G_A	Cluster_12095_funcExplorer_separate_CL_0002057_LPS_24h	chr10_4974605_G_A	chr10_4960010_G_A	Cluster_12095_funcExplorer_separate_CL_0002057_LPS_24h_chr10_4960010_G_A_cs_1	1984	0.024140119494084	-6.03910969684737	1	Cluster_12095	funcExplorer	separate	CL_0002057_LPS_24h	chr10	9.3356949692247e-10	0.0249087074080177	0.530949021952176	3.37837837837838e-10	8	403	8	FALSE	FALSE	4.98204458849096e-14	4.98204458849096e-14	4974605	rs3923936
chr10_4960010_G_A	Cluster_12095_funcExplorer_separate_CL_0002057_LPS_24h	chr10_4974835_T_G	chr10_4960010_G_A	Cluster_12095_funcExplorer_separate_CL_0002057_LPS_24h_chr10_4960010_G_A_cs_1	1985	0.0263793733137756	-6.05466543747008	1	Cluster_12095	funcExplorer	separate	CL_0002057_LPS_24h	chr10	9.3356949692247e-10	0.0249087074080177	0.530949021952176	3.37837837837838e-10	8	403	8	FALSE	FALSE	4.98204458849096e-14	4.98204458849096e-14	4974835	rs7089378
chr10_4960010_G_A	Cluster_12095_funcExplorer_separate_CL_0002057_LPS_24h	chr10_4976418_G_A	chr10_4960010_G_A	Cluster_12095_funcExplorer_separate_CL_0002057_LPS_24h_chr10_4960010_G_A_cs_1	1997	0.0263793733137756	-6.05466543747008	1	Cluster_12095	funcExplorer	separate	CL_0002057_LPS_24h	chr10	9.3356949692247e-10	0.0249087074080177	0.530949021952176	3.37837837837838e-10	8	403	8	FALSE	FALSE	4.98204458849096e-14	4.98204458849096e-14	4976418	rs10128236
chr10_4960010_G_A	Cluster_12095_funcExplorer_separate_CL_0002057_LPS_24h	chr10_4977767_G_A	chr10_4960010_G_A	Cluster_12095_funcExplorer_separate_CL_0002057_LPS_24h_chr10_4960010_G_A_cs_1	2004	0.0464958763690863	-6.18668560671786	1	Cluster_12095	funcExplorer	separate	CL_0002057_LPS_24h	chr10	9.3356949692247e-10	0.0249087074080177	0.530949021952176	3.37837837837838e-10	8	403	8	FALSE	FALSE	4.98204458849096e-14	4.98204458849096e-14	4977767
chr10_4960010_G_A	Cluster_12095_funcExplorer_separate_CL_0002057_LPS_24h	chr10_4977971_G_C	chr10_4960010_G_A	Cluster_12095_funcExplorer_separate_CL_0002057_LPS_24h_chr10_4960010_G_A_cs_1	2005	0.0263793733137756	-6.05466543747008	1	Cluster_12095	funcExplorer	separate	CL_0002057_LPS_24h	chr10	9.3356949692247e-10	0.0249087074080177	0.530949021952176	3.37837837837838e-10	8	403	8	FALSE	FALSE	4.98204458849096e-14	4.98204458849096e-14	4977971
chr10_4960010_G_A	Cluster_12095_funcExplorer_separate_CL_0002057_LPS_24h	chr10_4978433_C_T	chr10_4960010_G_A	Cluster_12095_funcExplorer_separate_CL_0002057_LPS_24h_chr10_4960010_G_A_cs_1	2006	0.0263793733137756	-6.05466543747008	1	Cluster_12095	funcExplorer	separate	CL_0002057_LPS_24h	chr10	9.3356949692247e-10	0.0249087074080177	0.530949021952176	3.37837837837838e-10	8	403	8	FALSE	FALSE	4.98204458849096e-14	4.98204458849096e-14	4978433	rs1139139
chr10_4960010_G_A	Cluster_12095_funcExplorer_separate_CL_0002057_LPS_24h	chr10_4978618_C_G	chr10_4960010_G_A	Cluster_12095_funcExplorer_separate_CL_0002057_LPS_24h_chr10_4960010_G_A_cs_1	2010	0.0263793733137756	-6.05466543747008	1	Cluster_12095	funcExplorer	separate	CL_0002057_LPS_24h	chr10	9.3356949692247e-10	0.0249087074080177	0.530949021952176	3.37837837837838e-10	8	403	8	FALSE	FALSE	4.98204458849096e-14	4.98204458849096e-14	4978618
chr10_4960010_G_A	Cluster_12095_funcExplorer_separate_CL_0002057_LPS_24h	chr10_4979198_T_C	chr10_4960010_G_A	Cluster_12095_funcExplorer_separate_CL_0002057_LPS_24h_chr10_4960010_G_A_cs_1	2014	0.0166832257784854	-5.94878139753469	1	Cluster_12095	funcExplorer	separate	CL_0002057_LPS_24h	chr10	9.3356949692247e-10	0.0249087074080177	0.530949021952176	3.37837837837838e-10	8	403	8	FALSE	FALSE	4.98204458849096e-14	4.98204458849096e-14	4979198	rs6601884
chr10_4960010_G_A	Cluster_12095_funcExplorer_separate_CL_0002057_LPS_24h	chr10_4979610_G_A	chr10_4960010_G_A	Cluster_12095_funcExplorer_separate_CL_0002057_LPS_24h_chr10_4960010_G_A_cs_1	2016	0.0173590056420859	-5.97476936312346	1	Cluster_12095	funcExplorer	separate	CL_0002057_LPS_24h	chr10	9.3356949692247e-10	0.0249087074080177	0.530949021952176	3.37837837837838e-10	8	403	8	FALSE	FALSE	4.98204458849096e-14	4.98204458849096e-14	4979610	rs11252857
chr10_4960010_G_A	Cluster_12095_funcExplorer_separate_CL_0002057_LPS_24h	chr10_4979958_AT_A	chr10_4960010_G_A	Cluster_12095_funcExplorer_separate_CL_0002057_LPS_24h_chr10_4960010_G_A_cs_1	2018	0.0186364011521531	-5.97726433966413	1	Cluster_12095	funcExplorer	separate	CL_0002057_LPS_24h	chr10	9.3356949692247e-10	0.0249087074080177	0.530949021952176	3.37837837837838e-10	8	403	8	FALSE	FALSE	4.98204458849096e-14	4.98204458849096e-14	4979958	rs373198056; rs34246984
chr10_89980514_A_G	F4_PEER_separate_CL_0000625_naive	chr10_89889960_T_G	chr10_89980514_A_G	F4_PEER_separate_CL_0000625_naive_chr10_89980514_A_G_cs_1	1291	0.0084684002589912	-5.15267919525705	1	F4	PEER	separate	CL_0000625_naive	chr10	5.02437229976742e-09	0.58272450109941	1	6.25e-10	178	251	1167	FALSE	FALSE	5.77127399359213e-157	5.77127399359213e-157	89889960
chr10_89980514_A_G	F4_PEER_separate_CL_0000625_naive	chr10_89892907_C_A	chr10_89980514_A_G	F4_PEER_separate_CL_0000625_naive_chr10_89980514_A_G_cs_1	1297	0.00612371896793507	-5.12415621375098	1	F4	PEER	separate	CL_0000625_naive	chr10	5.02437229976742e-09	0.58272450109941	1	6.25e-10	178	251	1167	FALSE	FALSE	5.77127399359213e-157	5.77127399359213e-157	89892907	rs67801980
chr10_89980514_A_G	F4_PEER_separate_CL_0000625_naive	chr10_89895299_C_CAT	chr10_89980514_A_G	F4_PEER_separate_CL_0000625_naive_chr10_89980514_A_G_cs_1	1301	0.00612200907227145	-5.11380789340747	1	F4	PEER	separate	CL_0000625_naive	chr10	5.02437229976742e-09	0.58272450109941	1	6.25e-10	178	251	1167	FALSE	FALSE	5.77127399359213e-157	5.77127399359213e-157	89895299	rs143948108
chr10_89980514_A_G	F4_PEER_separate_CL_0000625_naive	chr10_89895364_T_C	chr10_89980514_A_G	F4_PEER_separate_CL_0000625_naive_chr10_89980514_A_G_cs_1	1302	0.00612200907227145	-5.11380789340747	1	F4	PEER	separate	CL_0000625_naive	chr10	5.02437229976742e-09	0.58272450109941	1	6.25e-10	178	251	1167	FALSE	FALSE	5.77127399359213e-157	5.77127399359213e-157	89895364	rs72820722
chr10_89980514_A_G	F4_PEER_separate_CL_0000625_naive	chr10_89895928_C_CT	chr10_89980514_A_G	F4_PEER_separate_CL_0000625_naive_chr10_89980514_A_G_cs_1	1304	0.00612200907227145	-5.11380789340747	1	F4	PEER	separate	CL_0000625_naive	chr10	5.02437229976742e-09	0.58272450109941	1	6.25e-10	178	251	1167	FALSE	FALSE	5.77127399359213e-157	5.77127399359213e-157	89895928	rs71306846; rs398038543
chr10_89980514_A_G	F4_PEER_separate_CL_0000625_naive	chr10_89898420_A_G	chr10_89980514_A_G	F4_PEER_separate_CL_0000625_naive_chr10_89980514_A_G_cs_1	1305	0.0064104410671415	5.12502207352479	1	F4	PEER	separate	CL_0000625_naive	chr10	5.02437229976742e-09	0.58272450109941	1	6.25e-10	178	251	1167	FALSE	FALSE	5.77127399359213e-157	5.77127399359213e-157	89898420	rs2763332
chr10_89980514_A_G	F4_PEER_separate_CL_0000625_naive	chr10_89898571_T_C	chr10_89980514_A_G	F4_PEER_separate_CL_0000625_naive_chr10_89980514_A_G_cs_1	1306	0.0095251434412672	5.24952859647024	1	F4	PEER	separate	CL_0000625_naive	chr10	5.02437229976742e-09	0.58272450109941	1	6.25e-10	178	251	1167	FALSE	FALSE	5.77127399359213e-157	5.77127399359213e-157	89898571
chr10_89980514_A_G	F4_PEER_separate_CL_0000625_naive	chr10_89898917_C_T	chr10_89980514_A_G	F4_PEER_separate_CL_0000625_naive_chr10_89980514_A_G_cs_1	1307	0.0095251434412672	5.24952859647024	1	F4	PEER	separate	CL_0000625_naive	chr10	5.02437229976742e-09	0.58272450109941	1	6.25e-10	178	251	1167	FALSE	FALSE	5.77127399359213e-157	5.77127399359213e-157	89898917	rs2798620
chr10_89980514_A_G	F4_PEER_separate_CL_0000625_naive	chr10_89901802_G_A	chr10_89980514_A_G	F4_PEER_separate_CL_0000625_naive_chr10_89980514_A_G_cs_1	1309	0.00827834678971906	5.20007402645387	1	F4	PEER	separate	CL_0000625_naive	chr10	5.02437229976742e-09	0.58272450109941	1	6.25e-10	178	251	1167	FALSE	FALSE	5.77127399359213e-157	5.77127399359213e-157	89901802	rs1113984
chr10_89980514_A_G	F4_PEER_separate_CL_0000625_naive	chr10_89908527_C_T	chr10_89980514_A_G	F4_PEER_separate_CL_0000625_naive_chr10_89980514_A_G_cs_1	1321	0.0100073737949506	5.25529045064834	1	F4	PEER	separate	CL_0000625_naive	chr10	5.02437229976742e-09	0.58272450109941	1	6.25e-10	178	251	1167	FALSE	FALSE	5.77127399359213e-157	5.77127399359213e-157	89908527	rs1777955
chr10_89980514_A_G	F4_PEER_separate_CL_0000625_naive	chr10_89908614_C_T	chr10_89980514_A_G	F4_PEER_separate_CL_0000625_naive_chr10_89980514_A_G_cs_1	1322	0.0100073737949506	5.25529045064834	1	F4	PEER	separate	CL_0000625_naive	chr10	5.02437229976742e-09	0.58272450109941	1	6.25e-10	178	251	1167	FALSE	FALSE	5.77127399359213e-157	5.77127399359213e-157	89908614	rs1748493
chr10_89980514_A_G	F4_PEER_separate_CL_0000625_naive	chr10_89908733_T_G	chr10_89980514_A_G	F4_PEER_separate_CL_0000625_naive_chr10_89980514_A_G_cs_1	1325	0.0143204400571273	5.3400768049856	1	F4	PEER	separate	CL_0000625_naive	chr10	5.02437229976742e-09	0.58272450109941	1	6.25e-10	178	251	1167	FALSE	FALSE	5.77127399359213e-157	5.77127399359213e-157	89908733
chr10_89980514_A_G	F4_PEER_separate_CL_0000625_naive	chr10_89909387_A_G	chr10_89980514_A_G	F4_PEER_separate_CL_0000625_naive_chr10_89980514_A_G_cs_1	1327	0.00738595910155615	5.1696222173961	1	F4	PEER	separate	CL_0000625_naive	chr10	5.02437229976742e-09	0.58272450109941	1	6.25e-10	178	251	1167	FALSE	FALSE	5.77127399359213e-157	5.77127399359213e-157	89909387	rs1748492
chr10_89980514_A_G	F4_PEER_separate_CL_0000625_naive	chr10_89910796_C_T	chr10_89980514_A_G	F4_PEER_separate_CL_0000625_naive_chr10_89980514_A_G_cs_1	1329	0.00827834678971906	5.20007402645387	1	F4	PEER	separate	CL_0000625_naive	chr10	5.02437229976742e-09	0.58272450109941	1	6.25e-10	178	251	1167	FALSE	FALSE	5.77127399359213e-157	5.77127399359213e-157	89910796	rs1748495
chr10_89980514_A_G	F4_PEER_separate_CL_0000625_naive	chr10_89911888_C_T	chr10_89980514_A_G	F4_PEER_separate_CL_0000625_naive_chr10_89980514_A_G_cs_1	1330	0.0113577847883484	5.28566979291808	1	F4	PEER	separate	CL_0000625_naive	chr10	5.02437229976742e-09	0.58272450109941	1	6.25e-10	178	251	1167	FALSE	FALSE	5.77127399359213e-157	5.77127399359213e-157	89911888	rs2798616
chr10_89980514_A_G	F4_PEER_separate_CL_0000625_naive	chr10_89912041_AT_A	chr10_89980514_A_G	F4_PEER_separate_CL_0000625_naive_chr10_89980514_A_G_cs_1	1331	0.0174188497933709	5.38650631567997	1	F4	PEER	separate	CL_0000625_naive	chr10	5.02437229976742e-09	0.58272450109941	1	6.25e-10	178	251	1167	FALSE	FALSE	5.77127399359213e-157	5.77127399359213e-157	89912041	rs34729473; rs796608733
chr10_89980514_A_G	F4_PEER_separate_CL_0000625_naive	chr10_89913999_G_A	chr10_89980514_A_G	F4_PEER_separate_CL_0000625_naive_chr10_89980514_A_G_cs_1	1333	0.0106659686655504	5.26860535093381	1	F4	PEER	separate	CL_0000625_naive	chr10	5.02437229976742e-09	0.58272450109941	1	6.25e-10	178	251	1167	FALSE	FALSE	5.77127399359213e-157	5.77127399359213e-157	89913999	rs1111716
chr10_89980514_A_G	F4_PEER_separate_CL_0000625_naive	chr10_89918551_C_T	chr10_89980514_A_G	F4_PEER_separate_CL_0000625_naive_chr10_89980514_A_G_cs_1	1339	0.00901997287631273	5.21824934895483	1	F4	PEER	separate	CL_0000625_naive	chr10	5.02437229976742e-09	0.58272450109941	1	6.25e-10	178	251	1167	FALSE	FALSE	5.77127399359213e-157	5.77127399359213e-157	89918551	rs1274142
chr10_89980514_A_G	F4_PEER_separate_CL_0000625_naive	chr10_89918634_A_G	chr10_89980514_A_G	F4_PEER_separate_CL_0000625_naive_chr10_89980514_A_G_cs_1	1340	0.0064823344944388	5.10457712700889	1	F4	PEER	separate	CL_0000625_naive	chr10	5.02437229976742e-09	0.58272450109941	1	6.25e-10	178	251	1167	FALSE	FALSE	5.77127399359213e-157	5.77127399359213e-157	89918634
chr10_89980514_A_G	F4_PEER_separate_CL_0000625_naive	chr10_89918813_G_A	chr10_89980514_A_G	F4_PEER_separate_CL_0000625_naive_chr10_89980514_A_G_cs_1	1341	0.00672191596884442	5.1322308338484	1	F4	PEER	separate	CL_0000625_naive	chr10	5.02437229976742e-09	0.58272450109941	1	6.25e-10	178	251	1167	FALSE	FALSE	5.77127399359213e-157	5.77127399359213e-157	89918813	rs1274140
chr10_89980514_A_G	F4_PEER_separate_CL_0000625_naive	chr10_89918865_C_T	chr10_89980514_A_G	F4_PEER_separate_CL_0000625_naive_chr10_89980514_A_G_cs_1	1342	0.00672191596884442	5.1322308338484	1	F4	PEER	separate	CL_0000625_naive	chr10	5.02437229976742e-09	0.58272450109941	1	6.25e-10	178	251	1167	FALSE	FALSE	5.77127399359213e-157	5.77127399359213e-157	89918865	rs1274139
chr10_89980514_A_G	F4_PEER_separate_CL_0000625_naive	chr10_89921587_G_T	chr10_89980514_A_G	F4_PEER_separate_CL_0000625_naive_chr10_89980514_A_G_cs_1	1351	0.0121922686817261	5.28297027225626	1	F4	PEER	separate	CL_0000625_naive	chr10	5.02437229976742e-09	0.58272450109941	1	6.25e-10	178	251	1167	FALSE	FALSE	5.77127399359213e-157	5.77127399359213e-157	89921587	rs1296513
chr10_89980514_A_G	F4_PEER_separate_CL_0000625_naive	chr10_89922924_T_A	chr10_89980514_A_G	F4_PEER_separate_CL_0000625_naive_chr10_89980514_A_G_cs_1	1354	0.0167597654914187	5.36699817293497	1	F4	PEER	separate	CL_0000625_naive	chr10	5.02437229976742e-09	0.58272450109941	1	6.25e-10	178	251	1167	FALSE	FALSE	5.77127399359213e-157	5.77127399359213e-157	89922924	rs1274129
chr10_89980514_A_G	F4_PEER_separate_CL_0000625_naive	chr10_89923447_T_C	chr10_89980514_A_G	F4_PEER_separate_CL_0000625_naive_chr10_89980514_A_G_cs_1	1356	0.0167597654914187	5.36699817293497	1	F4	PEER	separate	CL_0000625_naive	chr10	5.02437229976742e-09	0.58272450109941	1	6.25e-10	178	251	1167	FALSE	FALSE	5.77127399359213e-157	5.77127399359213e-157	89923447	rs1274131
chr10_89980514_A_G	F4_PEER_separate_CL_0000625_naive	chr10_89924247_G_C	chr10_89980514_A_G	F4_PEER_separate_CL_0000625_naive_chr10_89980514_A_G_cs_1	1358	0.00997212630352062	5.24394826262742	1	F4	PEER	separate	CL_0000625_naive	chr10	5.02437229976742e-09	0.58272450109941	1	6.25e-10	178	251	1167	FALSE	FALSE	5.77127399359213e-157	5.77127399359213e-157	89924247	rs1274132
chr10_89980514_A_G	F4_PEER_separate_CL_0000625_naive	chr10_89926953_C_T	chr10_89980514_A_G	F4_PEER_separate_CL_0000625_naive_chr10_89980514_A_G_cs_1	1363	0.0117166731780413	5.27975554891098	1	F4	PEER	separate	CL_0000625_naive	chr10	5.02437229976742e-09	0.58272450109941	1	6.25e-10	178	251	1167	FALSE	FALSE	5.77127399359213e-157	5.77127399359213e-157	89926953	rs1274135
chr10_89980514_A_G	F4_PEER_separate_CL_0000625_naive	chr10_89927750_T_C	chr10_89980514_A_G	F4_PEER_separate_CL_0000625_naive_chr10_89980514_A_G_cs_1	1366	0.0117166731780413	5.27975554891098	1	F4	PEER	separate	CL_0000625_naive	chr10	5.02437229976742e-09	0.58272450109941	1	6.25e-10	178	251	1167	FALSE	FALSE	5.77127399359213e-157	5.77127399359213e-157	89927750	rs2763324
chr10_89980514_A_G	F4_PEER_separate_CL_0000625_naive	chr10_89930379_G_A	chr10_89980514_A_G	F4_PEER_separate_CL_0000625_naive_chr10_89980514_A_G_cs_1	1373	0.0167597654914187	5.36699817293497	1	F4	PEER	separate	CL_0000625_naive	chr10	5.02437229976742e-09	0.58272450109941	1	6.25e-10	178	251	1167	FALSE	FALSE	5.77127399359213e-157	5.77127399359213e-157	89930379
chr10_89980514_A_G	F4_PEER_separate_CL_0000625_naive	chr10_89933478_G_A	chr10_89980514_A_G	F4_PEER_separate_CL_0000625_naive_chr10_89980514_A_G_cs_1	1378	0.0167597654914187	5.36699817293497	1	F4	PEER	separate	CL_0000625_naive	chr10	5.02437229976742e-09	0.58272450109941	1	6.25e-10	178	251	1167	FALSE	FALSE	5.77127399359213e-157	5.77127399359213e-157	89933478	rs4572053
chr10_89980514_A_G	F4_PEER_separate_CL_0000625_naive	chr10_89934627_A_G	chr10_89980514_A_G	F4_PEER_separate_CL_0000625_naive_chr10_89980514_A_G_cs_1	1381	0.0117166731780413	5.27975554891098	1	F4	PEER	separate	CL_0000625_naive	chr10	5.02437229976742e-09	0.58272450109941	1	6.25e-10	178	251	1167	FALSE	FALSE	5.77127399359213e-157	5.77127399359213e-157	89934627	rs4272711
chr10_89980514_A_G	F4_PEER_separate_CL_0000625_naive	chr10_89938407_C_T	chr10_89980514_A_G	F4_PEER_separate_CL_0000625_naive_chr10_89980514_A_G_cs_1	1390	0.020693034018305	5.41061679035938	1	F4	PEER	separate	CL_0000625_naive	chr10	5.02437229976742e-09	0.58272450109941	1	6.25e-10	178	251	1167	FALSE	FALSE	5.77127399359213e-157	5.77127399359213e-157	89938407	rs2763333
chr10_89980514_A_G	F4_PEER_separate_CL_0000625_naive	chr10_89947103_G_A	chr10_89980514_A_G	F4_PEER_separate_CL_0000625_naive_chr10_89980514_A_G_cs_1	1406	0.0166381152877597	5.27090876833066	1	F4	PEER	separate	CL_0000625_naive	chr10	5.02437229976742e-09	0.58272450109941	1	6.25e-10	178	251	1167	FALSE	FALSE	5.77127399359213e-157	5.77127399359213e-157	89947103	rs1936222
chr10_89980514_A_G	F4_PEER_separate_CL_0000625_naive	chr10_89947786_G_T	chr10_89980514_A_G	F4_PEER_separate_CL_0000625_naive_chr10_89980514_A_G_cs_1	1409	0.0167597654914187	5.36699817293497	1	F4	PEER	separate	CL_0000625_naive	chr10	5.02437229976742e-09	0.58272450109941	1	6.25e-10	178	251	1167	FALSE	FALSE	5.77127399359213e-157	5.77127399359213e-157	89947786
chr10_89980514_A_G	F4_PEER_separate_CL_0000625_naive	chr10_89949015_G_A	chr10_89980514_A_G	F4_PEER_separate_CL_0000625_naive_chr10_89980514_A_G_cs_1	1411	0.0166381152877597	5.27090876833066	1	F4	PEER	separate	CL_0000625_naive	chr10	5.02437229976742e-09	0.58272450109941	1	6.25e-10	178	251	1167	FALSE	FALSE	5.77127399359213e-157	5.77127399359213e-157	89949015	rs7912852
chr10_89980514_A_G	F4_PEER_separate_CL_0000625_naive	chr10_89949366_A_G	chr10_89980514_A_G	F4_PEER_separate_CL_0000625_naive_chr10_89980514_A_G_cs_1	1413	0.0229642985091452	5.3418935385344	1	F4	PEER	separate	CL_0000625_naive	chr10	5.02437229976742e-09	0.58272450109941	1	6.25e-10	178	251	1167	FALSE	FALSE	5.77127399359213e-157	5.77127399359213e-157	89949366
chr10_89980514_A_G	F4_PEER_separate_CL_0000625_naive	chr10_89949374_G_A	chr10_89980514_A_G	F4_PEER_separate_CL_0000625_naive_chr10_89980514_A_G_cs_1	1414	0.0229642985091452	5.3418935385344	1	F4	PEER	separate	CL_0000625_naive	chr10	5.02437229976742e-09	0.58272450109941	1	6.25e-10	178	251	1167	FALSE	FALSE	5.77127399359213e-157	5.77127399359213e-157	89949374	rs7089587
chr10_89980514_A_G	F4_PEER_separate_CL_0000625_naive	chr10_89951194_G_A	chr10_89980514_A_G	F4_PEER_separate_CL_0000625_naive_chr10_89980514_A_G_cs_1	1419	0.0504543639171706	5.59564300848047	1	F4	PEER	separate	CL_0000625_naive	chr10	5.02437229976742e-09	0.58272450109941	1	6.25e-10	178	251	1167	FALSE	FALSE	5.77127399359213e-157	5.77127399359213e-157	89951194	rs1954410
chr10_89980514_A_G	F4_PEER_separate_CL_0000625_naive	chr10_89955420_A_T	chr10_89980514_A_G	F4_PEER_separate_CL_0000625_naive_chr10_89980514_A_G_cs_1	1426	0.0166381152877596	5.27090876833066	1	F4	PEER	separate	CL_0000625_naive	chr10	5.02437229976742e-09	0.58272450109941	1	6.25e-10	178	251	1167	FALSE	FALSE	5.77127399359213e-157	5.77127399359213e-157	89955420	rs2000285
chr10_89980514_A_G	F4_PEER_separate_CL_0000625_naive	chr10_89955833_G_T	chr10_89980514_A_G	F4_PEER_separate_CL_0000625_naive_chr10_89980514_A_G_cs_1	1427	0.0167597654914187	5.36699817293497	1	F4	PEER	separate	CL_0000625_naive	chr10	5.02437229976742e-09	0.58272450109941	1	6.25e-10	178	251	1167	FALSE	FALSE	5.77127399359213e-157	5.77127399359213e-157	89955833	rs1343365
chr10_89980514_A_G	F4_PEER_separate_CL_0000625_naive	chr10_89956188_A_T	chr10_89980514_A_G	F4_PEER_separate_CL_0000625_naive_chr10_89980514_A_G_cs_1	1429	0.0166381152877597	5.27090876833066	1	F4	PEER	separate	CL_0000625_naive	chr10	5.02437229976742e-09	0.58272450109941	1	6.25e-10	178	251	1167	FALSE	FALSE	5.77127399359213e-157	5.77127399359213e-157	89956188	rs1936217
chr10_89980514_A_G	F4_PEER_separate_CL_0000625_naive	chr10_89956271_C_T	chr10_89980514_A_G	F4_PEER_separate_CL_0000625_naive_chr10_89980514_A_G_cs_1	1430	0.0166381152877597	5.27090876833066	1	F4	PEER	separate	CL_0000625_naive	chr10	5.02437229976742e-09	0.58272450109941	1	6.25e-10	178	251	1167	FALSE	FALSE	5.77127399359213e-157	5.77127399359213e-157	89956271
chr10_89980514_A_G	F4_PEER_separate_CL_0000625_naive	chr10_89956481_G_C	chr10_89980514_A_G	F4_PEER_separate_CL_0000625_naive_chr10_89980514_A_G_cs_1	1432	0.0166381152877597	5.27090876833066	1	F4	PEER	separate	CL_0000625_naive	chr10	5.02437229976742e-09	0.58272450109941	1	6.25e-10	178	251	1167	FALSE	FALSE	5.77127399359213e-157	5.77127399359213e-157	89956481
chr10_89980514_A_G	F4_PEER_separate_CL_0000625_naive	chr10_89965249_G_C	chr10_89980514_A_G	F4_PEER_separate_CL_0000625_naive_chr10_89980514_A_G_cs_1	1442	0.0210656714702777	5.40763848192604	1	F4	PEER	separate	CL_0000625_naive	chr10	5.02437229976742e-09	0.58272450109941	1	6.25e-10	178	251	1167	FALSE	FALSE	5.77127399359213e-157	5.77127399359213e-157	89965249	rs10509584
chr10_89980514_A_G	F4_PEER_separate_CL_0000625_naive	chr10_89967298_G_A	chr10_89980514_A_G	F4_PEER_separate_CL_0000625_naive_chr10_89980514_A_G_cs_1	1445	0.0170633710287627	5.36414890349741	1	F4	PEER	separate	CL_0000625_naive	chr10	5.02437229976742e-09	0.58272450109941	1	6.25e-10	178	251	1167	FALSE	FALSE	5.77127399359213e-157	5.77127399359213e-157	89967298
chr10_89980514_A_G	F4_PEER_separate_CL_0000625_naive	chr10_89971790_T_C	chr10_89980514_A_G	F4_PEER_separate_CL_0000625_naive_chr10_89980514_A_G_cs_1	1454	0.0389478749657226	5.45840193071204	1	F4	PEER	separate	CL_0000625_naive	chr10	5.02437229976742e-09	0.58272450109941	1	6.25e-10	178	251	1167	FALSE	FALSE	5.77127399359213e-157	5.77127399359213e-157	89971790	rs12414272
chr10_89980514_A_G	F4_PEER_separate_CL_0000625_naive	chr10_89977890_A_T	chr10_89980514_A_G	F4_PEER_separate_CL_0000625_naive_chr10_89980514_A_G_cs_1	1468	0.024962723426499	5.49317371943135	1	F4	PEER	separate	CL_0000625_naive	chr10	5.02437229976742e-09	0.58272450109941	1	6.25e-10	178	251	1167	FALSE	FALSE	5.77127399359213e-157	5.77127399359213e-157	89977890	rs4933167
chr10_89980514_A_G	F4_PEER_separate_CL_0000625_naive	chr10_89978998_T_C	chr10_89980514_A_G	F4_PEER_separate_CL_0000625_naive_chr10_89980514_A_G_cs_1	1475	0.0825336313181283	5.76013664664697	1	F4	PEER	separate	CL_0000625_naive	chr10	5.02437229976742e-09	0.58272450109941	1	6.25e-10	178	251	1167	FALSE	FALSE	5.77127399359213e-157	5.77127399359213e-157	89978998	rs10881718
chr10_89980514_A_G	F4_PEER_separate_CL_0000625_naive	chr10_89979758_A_C	chr10_89980514_A_G	F4_PEER_separate_CL_0000625_naive_chr10_89980514_A_G_cs_1	1478	0.0611883036007398	5.69399975926193	1	F4	PEER	separate	CL_0000625_naive	chr10	5.02437229976742e-09	0.58272450109941	1	6.25e-10	178	251	1167	FALSE	FALSE	5.77127399359213e-157	5.77127399359213e-157	89979758
chr10_89980514_A_G	F4_PEER_separate_CL_0000625_naive	chr10_89980514_A_G	chr10_89980514_A_G	F4_PEER_separate_CL_0000625_naive_chr10_89980514_A_G_cs_1	1479	0.101403418746791	5.81341941297391	1	F4	PEER	separate	CL_0000625_naive	chr10	5.02437229976742e-09	0.58272450109941	1	6.25e-10	178	251	1167	FALSE	FALSE	5.77127399359213e-157	5.77127399359213e-157	89980514	rs7094046
chr10_89980514_A_G	F4_PEER_separate_CL_0000625_naive	chr10_89982190_G_C	chr10_89980514_A_G	F4_PEER_separate_CL_0000625_naive_chr10_89980514_A_G_cs_1	1485	0.101403418746791	5.81341941297391	1	F4	PEER	separate	CL_0000625_naive	chr10	5.02437229976742e-09	0.58272450109941	1	6.25e-10	178	251	1167	FALSE	FALSE	5.77127399359213e-157	5.77127399359213e-157	89982190
chr10_89980514_A_G	F4_PEER_separate_CL_0000625_naive	chr10_89985108_G_A	chr10_89980514_A_G	F4_PEER_separate_CL_0000625_naive_chr10_89980514_A_G_cs_1	1493	0.0651100475170179	5.71724328611092	1	F4	PEER	separate	CL_0000625_naive	chr10	5.02437229976742e-09	0.58272450109941	1	6.25e-10	178	251	1167	FALSE	FALSE	5.77127399359213e-157	5.77127399359213e-157	89985108	rs4301707
chr10_89980514_A_G	F4_PEER_separate_CL_0000625_naive	chr10_89989856_G_A	chr10_89980514_A_G	F4_PEER_separate_CL_0000625_naive_chr10_89980514_A_G_cs_1	1500	0.00783091599943708	5.22874089096605	1	F4	PEER	separate	CL_0000625_naive	chr10	5.02437229976742e-09	0.58272450109941	1	6.25e-10	178	251	1167	FALSE	FALSE	5.77127399359213e-157	5.77127399359213e-157	89989856	rs1936224
chr10_95253548_C_G	X27.GSE9006_TYPE_1_VS_TYPE_2_DIABETES_PBMC_AT_DX_UP_PLIER_integrated	chr10_94925431_CTTT_CT	chr10_95253548_C_G	X27.GSE9006_TYPE_1_VS_TYPE_2_DIABETES_PBMC_AT_DX_UP_PLIER_integrated_CL_0002057_LPS_2h_chr10_95253548_C_G_cs_1	519	0.00450498875975169	-4.69293781104618	1	X27.GSE9006_TYPE_1_VS_TYPE_2_DIABETES_PBMC_AT_DX_UP	PLIER	integrated	CL_0002057_LPS_2h	chr10	2.82649942194336e-08	0.0953387615629636	1	5.68181818181818e-10	58	265	678	FALSE	FALSE	1.04033974884969e-28	2.08067949769938e-28	94925431
chr10_95253548_C_G	F20_PEER_integrated	chr10_94999426_GTAAA_G	chr10_95260180_G_T	F20_PEER_integrated_CL_0002057_LPS_24h_chr10_95260180_G_T_cs_1	767	0.00350781147187829	4.65295086495775	1	F20	PEER	integrated	CL_0002057_LPS_24h	chr10	2.85254588050849e-08	0.758452466439159	1	1.02040816326531e-09	48	574	1131	FALSE	FALSE	0.018980720760344	0.0379614415206881	94999426	rs139311383
chr10_95253548_C_G	X27.GSE9006_TYPE_1_VS_TYPE_2_DIABETES_PBMC_AT_DX_UP_PLIER_integrated	chr10_95000310_G_C	chr10_95253548_C_G	X27.GSE9006_TYPE_1_VS_TYPE_2_DIABETES_PBMC_AT_DX_UP_PLIER_integrated_CL_0002057_LPS_2h_chr10_95253548_C_G_cs_1	792	0.00361352744392773	-4.67112630104389	1	X27.GSE9006_TYPE_1_VS_TYPE_2_DIABETES_PBMC_AT_DX_UP	PLIER	integrated	CL_0002057_LPS_2h	chr10	2.82649942194336e-08	0.0953387615629636	1	5.68181818181818e-10	58	265	678	FALSE	FALSE	1.04033974884969e-28	2.08067949769938e-28	95000310	rs72818651
chr10_95253548_C_G	F20_PEER_integrated	chr10_95000310_G_C	chr10_95260180_G_T	F20_PEER_integrated_CL_0002057_LPS_24h_chr10_95260180_G_T_cs_1	771	0.0029895425337394	4.57876418479936	1	F20	PEER	integrated	CL_0002057_LPS_24h	chr10	2.85254588050849e-08	0.758452466439159	1	1.02040816326531e-09	48	574	1131	FALSE	FALSE	0.018980720760344	0.0379614415206881	95000310	rs72818651
chr10_95253548_C_G	X27.GSE9006_TYPE_1_VS_TYPE_2_DIABETES_PBMC_AT_DX_UP_PLIER_integrated	chr10_95000562_T_C	chr10_95253548_C_G	X27.GSE9006_TYPE_1_VS_TYPE_2_DIABETES_PBMC_AT_DX_UP_PLIER_integrated_CL_0002057_LPS_2h_chr10_95253548_C_G_cs_1	795	0.00361352744392773	-4.67112630104389	1	X27.GSE9006_TYPE_1_VS_TYPE_2_DIABETES_PBMC_AT_DX_UP	PLIER	integrated	CL_0002057_LPS_2h	chr10	2.82649942194336e-08	0.0953387615629636	1	5.68181818181818e-10	58	265	678	FALSE	FALSE	1.04033974884969e-28	2.08067949769938e-28	95000562	rs72818652
chr10_95253548_C_G	F20_PEER_integrated	chr10_95000562_T_C	chr10_95260180_G_T	F20_PEER_integrated_CL_0002057_LPS_24h_chr10_95260180_G_T_cs_1	774	0.0029895425337394	4.57876418479936	1	F20	PEER	integrated	CL_0002057_LPS_24h	chr10	2.85254588050849e-08	0.758452466439159	1	1.02040816326531e-09	48	574	1131	FALSE	FALSE	0.018980720760344	0.0379614415206881	95000562	rs72818652
chr10_95253548_C_G	F20_PEER_integrated	chr10_95001047_A_G	chr10_95260180_G_T	F20_PEER_integrated_CL_0002057_LPS_24h_chr10_95260180_G_T_cs_1	779	0.00342738462598757	4.66780222207267	1	F20	PEER	integrated	CL_0002057_LPS_24h	chr10	2.85254588050849e-08	0.758452466439159	1	1.02040816326531e-09	48	574	1131	FALSE	FALSE	0.018980720760344	0.0379614415206881	95001047	rs72818656
chr10_95253548_C_G	X27.GSE9006_TYPE_1_VS_TYPE_2_DIABETES_PBMC_AT_DX_UP_PLIER_integrated	chr10_95001432_A_G	chr10_95253548_C_G	X27.GSE9006_TYPE_1_VS_TYPE_2_DIABETES_PBMC_AT_DX_UP_PLIER_integrated_CL_0002057_LPS_2h_chr10_95253548_C_G_cs_1	806	0.00361352744392773	-4.67112630104389	1	X27.GSE9006_TYPE_1_VS_TYPE_2_DIABETES_PBMC_AT_DX_UP	PLIER	integrated	CL_0002057_LPS_2h	chr10	2.82649942194336e-08	0.0953387615629636	1	5.68181818181818e-10	58	265	678	FALSE	FALSE	1.04033974884969e-28	2.08067949769938e-28	95001432	rs570534055
chr10_95253548_C_G	F20_PEER_integrated	chr10_95001432_A_G	chr10_95260180_G_T	F20_PEER_integrated_CL_0002057_LPS_24h_chr10_95260180_G_T_cs_1	785	0.0029895425337394	4.57876418479936	1	F20	PEER	integrated	CL_0002057_LPS_24h	chr10	2.85254588050849e-08	0.758452466439159	1	1.02040816326531e-09	48	574	1131	FALSE	FALSE	0.018980720760344	0.0379614415206881	95001432	rs570534055
chr10_95253548_C_G	X27.GSE9006_TYPE_1_VS_TYPE_2_DIABETES_PBMC_AT_DX_UP_PLIER_integrated	chr10_95002138_G_A	chr10_95253548_C_G	X27.GSE9006_TYPE_1_VS_TYPE_2_DIABETES_PBMC_AT_DX_UP_PLIER_integrated_CL_0002057_LPS_2h_chr10_95253548_C_G_cs_1	810	0.00361352744392773	-4.67112630104389	1	X27.GSE9006_TYPE_1_VS_TYPE_2_DIABETES_PBMC_AT_DX_UP	PLIER	integrated	CL_0002057_LPS_2h	chr10	2.82649942194336e-08	0.0953387615629636	1	5.68181818181818e-10	58	265	678	FALSE	FALSE	1.04033974884969e-28	2.08067949769938e-28	95002138	rs72818659
chr10_95253548_C_G	F20_PEER_integrated	chr10_95002138_G_A	chr10_95260180_G_T	F20_PEER_integrated_CL_0002057_LPS_24h_chr10_95260180_G_T_cs_1	789	0.0029895425337394	4.57876418479936	1	F20	PEER	integrated	CL_0002057_LPS_24h	chr10	2.85254588050849e-08	0.758452466439159	1	1.02040816326531e-09	48	574	1131	FALSE	FALSE	0.018980720760344	0.0379614415206881	95002138	rs72818659
chr10_95253548_C_G	X27.GSE9006_TYPE_1_VS_TYPE_2_DIABETES_PBMC_AT_DX_UP_PLIER_integrated	chr10_95002841_T_G	chr10_95253548_C_G	X27.GSE9006_TYPE_1_VS_TYPE_2_DIABETES_PBMC_AT_DX_UP_PLIER_integrated_CL_0002057_LPS_2h_chr10_95253548_C_G_cs_1	813	0.00361352744392773	-4.67112630104389	1	X27.GSE9006_TYPE_1_VS_TYPE_2_DIABETES_PBMC_AT_DX_UP	PLIER	integrated	CL_0002057_LPS_2h	chr10	2.82649942194336e-08	0.0953387615629636	1	5.68181818181818e-10	58	265	678	FALSE	FALSE	1.04033974884969e-28	2.08067949769938e-28	95002841	rs72818661
chr10_95253548_C_G	F20_PEER_integrated	chr10_95002841_T_G	chr10_95260180_G_T	F20_PEER_integrated_CL_0002057_LPS_24h_chr10_95260180_G_T_cs_1	792	0.0029895425337394	4.57876418479936	1	F20	PEER	integrated	CL_0002057_LPS_24h	chr10	2.85254588050849e-08	0.758452466439159	1	1.02040816326531e-09	48	574	1131	FALSE	FALSE	0.018980720760344	0.0379614415206881	95002841	rs72818661
chr10_95253548_C_G	F20_PEER_integrated	chr10_95006916_G_A	chr10_95260180_G_T	F20_PEER_integrated_CL_0002057_LPS_24h_chr10_95260180_G_T_cs_1	800	0.0029895425337394	4.57876418479936	1	F20	PEER	integrated	CL_0002057_LPS_24h	chr10	2.85254588050849e-08	0.758452466439159	1	1.02040816326531e-09	48	574	1131	FALSE	FALSE	0.018980720760344	0.0379614415206881	95006916	rs11596096
chr10_95253548_C_G	X27.GSE9006_TYPE_1_VS_TYPE_2_DIABETES_PBMC_AT_DX_UP_PLIER_integrated	chr10_95006916_G_A	chr10_95253548_C_G	X27.GSE9006_TYPE_1_VS_TYPE_2_DIABETES_PBMC_AT_DX_UP_PLIER_integrated_CL_0002057_LPS_2h_chr10_95253548_C_G_cs_1	821	0.00361352744392773	-4.67112630104389	1	X27.GSE9006_TYPE_1_VS_TYPE_2_DIABETES_PBMC_AT_DX_UP	PLIER	integrated	CL_0002057_LPS_2h	chr10	2.82649942194336e-08	0.0953387615629636	1	5.68181818181818e-10	58	265	678	FALSE	FALSE	1.04033974884969e-28	2.08067949769938e-28	95006916	rs11596096
chr10_95253548_C_G	F20_PEER_integrated	chr10_95007893_C_T	chr10_95260180_G_T	F20_PEER_integrated_CL_0002057_LPS_24h_chr10_95260180_G_T_cs_1	803	0.0029895425337394	4.57876418479936	1	F20	PEER	integrated	CL_0002057_LPS_24h	chr10	2.85254588050849e-08	0.758452466439159	1	1.02040816326531e-09	48	574	1131	FALSE	FALSE	0.018980720760344	0.0379614415206881	95007893	rs56408997
chr10_95253548_C_G	X27.GSE9006_TYPE_1_VS_TYPE_2_DIABETES_PBMC_AT_DX_UP_PLIER_integrated	chr10_95007893_C_T	chr10_95253548_C_G	X27.GSE9006_TYPE_1_VS_TYPE_2_DIABETES_PBMC_AT_DX_UP_PLIER_integrated_CL_0002057_LPS_2h_chr10_95253548_C_G_cs_1	824	0.00361352744392773	-4.67112630104389	1	X27.GSE9006_TYPE_1_VS_TYPE_2_DIABETES_PBMC_AT_DX_UP	PLIER	integrated	CL_0002057_LPS_2h	chr10	2.82649942194336e-08	0.0953387615629636	1	5.68181818181818e-10	58	265	678	FALSE	FALSE	1.04033974884969e-28	2.08067949769938e-28	95007893	rs56408997
chr10_95253548_C_G	F20_PEER_integrated	chr10_95009897_A_G	chr10_95260180_G_T	F20_PEER_integrated_CL_0002057_LPS_24h_chr10_95260180_G_T_cs_1	814	0.0029895425337394	4.57876418479936	1	F20	PEER	integrated	CL_0002057_LPS_24h	chr10	2.85254588050849e-08	0.758452466439159	1	1.02040816326531e-09	48	574	1131	FALSE	FALSE	0.018980720760344	0.0379614415206881	95009897	rs55753924
chr10_95253548_C_G	X27.GSE9006_TYPE_1_VS_TYPE_2_DIABETES_PBMC_AT_DX_UP_PLIER_integrated	chr10_95009897_A_G	chr10_95253548_C_G	X27.GSE9006_TYPE_1_VS_TYPE_2_DIABETES_PBMC_AT_DX_UP_PLIER_integrated_CL_0002057_LPS_2h_chr10_95253548_C_G_cs_1	835	0.00361352744392773	-4.67112630104389	1	X27.GSE9006_TYPE_1_VS_TYPE_2_DIABETES_PBMC_AT_DX_UP	PLIER	integrated	CL_0002057_LPS_2h	chr10	2.82649942194336e-08	0.0953387615629636	1	5.68181818181818e-10	58	265	678	FALSE	FALSE	1.04033974884969e-28	2.08067949769938e-28	95009897	rs55753924
chr10_95253548_C_G	X27.GSE9006_TYPE_1_VS_TYPE_2_DIABETES_PBMC_AT_DX_UP_PLIER_integrated	chr10_95011973_C_A	chr10_95253548_C_G	X27.GSE9006_TYPE_1_VS_TYPE_2_DIABETES_PBMC_AT_DX_UP_PLIER_integrated_CL_0002057_LPS_2h_chr10_95253548_C_G_cs_1	842	0.00361352744392773	-4.67112630104389	1	X27.GSE9006_TYPE_1_VS_TYPE_2_DIABETES_PBMC_AT_DX_UP	PLIER	integrated	CL_0002057_LPS_2h	chr10	2.82649942194336e-08	0.0953387615629636	1	5.68181818181818e-10	58	265	678	FALSE	FALSE	1.04033974884969e-28	2.08067949769938e-28	95011973	rs72818668
chr10_95253548_C_G	F20_PEER_integrated	chr10_95011973_C_A	chr10_95260180_G_T	F20_PEER_integrated_CL_0002057_LPS_24h_chr10_95260180_G_T_cs_1	821	0.0029895425337394	4.57876418479936	1	F20	PEER	integrated	CL_0002057_LPS_24h	chr10	2.85254588050849e-08	0.758452466439159	1	1.02040816326531e-09	48	574	1131	FALSE	FALSE	0.018980720760344	0.0379614415206881	95011973	rs72818668
chr10_95253548_C_G	X27.GSE9006_TYPE_1_VS_TYPE_2_DIABETES_PBMC_AT_DX_UP_PLIER_integrated	chr10_95015244_G_A	chr10_95253548_C_G	X27.GSE9006_TYPE_1_VS_TYPE_2_DIABETES_PBMC_AT_DX_UP_PLIER_integrated_CL_0002057_LPS_2h_chr10_95253548_C_G_cs_1	851	0.00361352744392773	-4.67112630104389	1	X27.GSE9006_TYPE_1_VS_TYPE_2_DIABETES_PBMC_AT_DX_UP	PLIER	integrated	CL_0002057_LPS_2h	chr10	2.82649942194336e-08	0.0953387615629636	1	5.68181818181818e-10	58	265	678	FALSE	FALSE	1.04033974884969e-28	2.08067949769938e-28	95015244
chr10_95253548_C_G	F20_PEER_integrated	chr10_95015244_G_A	chr10_95260180_G_T	F20_PEER_integrated_CL_0002057_LPS_24h_chr10_95260180_G_T_cs_1	830	0.0029895425337394	4.57876418479936	1	F20	PEER	integrated	CL_0002057_LPS_24h	chr10	2.85254588050849e-08	0.758452466439159	1	1.02040816326531e-09	48	574	1131	FALSE	FALSE	0.018980720760344	0.0379614415206881	95015244
chr10_95253548_C_G	X27.GSE9006_TYPE_1_VS_TYPE_2_DIABETES_PBMC_AT_DX_UP_PLIER_integrated	chr10_95015930_C_A	chr10_95253548_C_G	X27.GSE9006_TYPE_1_VS_TYPE_2_DIABETES_PBMC_AT_DX_UP_PLIER_integrated_CL_0002057_LPS_2h_chr10_95253548_C_G_cs_1	852	0.00361352744392773	-4.67112630104389	1	X27.GSE9006_TYPE_1_VS_TYPE_2_DIABETES_PBMC_AT_DX_UP	PLIER	integrated	CL_0002057_LPS_2h	chr10	2.82649942194336e-08	0.0953387615629636	1	5.68181818181818e-10	58	265	678	FALSE	FALSE	1.04033974884969e-28	2.08067949769938e-28	95015930	rs139065552
chr10_95253548_C_G	X27.GSE9006_TYPE_1_VS_TYPE_2_DIABETES_PBMC_AT_DX_UP_PLIER_integrated	chr10_95023312_C_T	chr10_95253548_C_G	X27.GSE9006_TYPE_1_VS_TYPE_2_DIABETES_PBMC_AT_DX_UP_PLIER_integrated_CL_0002057_LPS_2h_chr10_95253548_C_G_cs_1	880	0.00309497059270802	-4.57269288829433	1	X27.GSE9006_TYPE_1_VS_TYPE_2_DIABETES_PBMC_AT_DX_UP	PLIER	integrated	CL_0002057_LPS_2h	chr10	2.82649942194336e-08	0.0953387615629636	1	5.68181818181818e-10	58	265	678	FALSE	FALSE	1.04033974884969e-28	2.08067949769938e-28	95023312	rs72818673
chr10_95253548_C_G	X27.GSE9006_TYPE_1_VS_TYPE_2_DIABETES_PBMC_AT_DX_UP_PLIER_integrated	chr10_95024832_A_C	chr10_95253548_C_G	X27.GSE9006_TYPE_1_VS_TYPE_2_DIABETES_PBMC_AT_DX_UP_PLIER_integrated_CL_0002057_LPS_2h_chr10_95253548_C_G_cs_1	884	0.00309497059270802	-4.57269288829433	1	X27.GSE9006_TYPE_1_VS_TYPE_2_DIABETES_PBMC_AT_DX_UP	PLIER	integrated	CL_0002057_LPS_2h	chr10	2.82649942194336e-08	0.0953387615629636	1	5.68181818181818e-10	58	265	678	FALSE	FALSE	1.04033974884969e-28	2.08067949769938e-28	95024832
chr10_95253548_C_G	X27.GSE9006_TYPE_1_VS_TYPE_2_DIABETES_PBMC_AT_DX_UP_PLIER_integrated	chr10_95025265_T_C	chr10_95253548_C_G	X27.GSE9006_TYPE_1_VS_TYPE_2_DIABETES_PBMC_AT_DX_UP_PLIER_integrated_CL_0002057_LPS_2h_chr10_95253548_C_G_cs_1	888	0.00309497059270802	-4.57269288829433	1	X27.GSE9006_TYPE_1_VS_TYPE_2_DIABETES_PBMC_AT_DX_UP	PLIER	integrated	CL_0002057_LPS_2h	chr10	2.82649942194336e-08	0.0953387615629636	1	5.68181818181818e-10	58	265	678	FALSE	FALSE	1.04033974884969e-28	2.08067949769938e-28	95025265	rs113526640
chr10_95253548_C_G	X27.GSE9006_TYPE_1_VS_TYPE_2_DIABETES_PBMC_AT_DX_UP_PLIER_integrated	chr10_95029378_A_G	chr10_95253548_C_G	X27.GSE9006_TYPE_1_VS_TYPE_2_DIABETES_PBMC_AT_DX_UP_PLIER_integrated_CL_0002057_LPS_2h_chr10_95253548_C_G_cs_1	896	0.00309497059270802	-4.57269288829433	1	X27.GSE9006_TYPE_1_VS_TYPE_2_DIABETES_PBMC_AT_DX_UP	PLIER	integrated	CL_0002057_LPS_2h	chr10	2.82649942194336e-08	0.0953387615629636	1	5.68181818181818e-10	58	265	678	FALSE	FALSE	1.04033974884969e-28	2.08067949769938e-28	95029378	rs72818679
chr10_95253548_C_G	X27.GSE9006_TYPE_1_VS_TYPE_2_DIABETES_PBMC_AT_DX_UP_PLIER_integrated	chr10_95032717_A_G	chr10_95253548_C_G	X27.GSE9006_TYPE_1_VS_TYPE_2_DIABETES_PBMC_AT_DX_UP_PLIER_integrated_CL_0002057_LPS_2h_chr10_95253548_C_G_cs_1	908	0.00309497059270802	-4.57269288829433	1	X27.GSE9006_TYPE_1_VS_TYPE_2_DIABETES_PBMC_AT_DX_UP	PLIER	integrated	CL_0002057_LPS_2h	chr10	2.82649942194336e-08	0.0953387615629636	1	5.68181818181818e-10	58	265	678	FALSE	FALSE	1.04033974884969e-28	2.08067949769938e-28	95032717	rs72818680
chr10_95253548_C_G	X27.GSE9006_TYPE_1_VS_TYPE_2_DIABETES_PBMC_AT_DX_UP_PLIER_integrated	chr10_95035530_A_G	chr10_95253548_C_G	X27.GSE9006_TYPE_1_VS_TYPE_2_DIABETES_PBMC_AT_DX_UP_PLIER_integrated_CL_0002057_LPS_2h_chr10_95253548_C_G_cs_1	916	0.00309497059270802	-4.57269288829433	1	X27.GSE9006_TYPE_1_VS_TYPE_2_DIABETES_PBMC_AT_DX_UP	PLIER	integrated	CL_0002057_LPS_2h	chr10	2.82649942194336e-08	0.0953387615629636	1	5.68181818181818e-10	58	265	678	FALSE	FALSE	1.04033974884969e-28	2.08067949769938e-28	95035530	rs11188148
chr10_95253548_C_G	X27.GSE9006_TYPE_1_VS_TYPE_2_DIABETES_PBMC_AT_DX_UP_PLIER_integrated	chr10_95037814_G_A	chr10_95253548_C_G	X27.GSE9006_TYPE_1_VS_TYPE_2_DIABETES_PBMC_AT_DX_UP_PLIER_integrated_CL_0002057_LPS_2h_chr10_95253548_C_G_cs_1	923	0.00309497059270802	-4.57269288829433	1	X27.GSE9006_TYPE_1_VS_TYPE_2_DIABETES_PBMC_AT_DX_UP	PLIER	integrated	CL_0002057_LPS_2h	chr10	2.82649942194336e-08	0.0953387615629636	1	5.68181818181818e-10	58	265	678	FALSE	FALSE	1.04033974884969e-28	2.08067949769938e-28	95037814	rs11572174
chr10_95253548_C_G	X27.GSE9006_TYPE_1_VS_TYPE_2_DIABETES_PBMC_AT_DX_UP_PLIER_integrated	chr10_95038992_T_C	chr10_95253548_C_G	X27.GSE9006_TYPE_1_VS_TYPE_2_DIABETES_PBMC_AT_DX_UP_PLIER_integrated_CL_0002057_LPS_2h_chr10_95253548_C_G_cs_1	926	0.00309497059270802	-4.57269288829433	1	X27.GSE9006_TYPE_1_VS_TYPE_2_DIABETES_PBMC_AT_DX_UP	PLIER	integrated	CL_0002057_LPS_2h	chr10	2.82649942194336e-08	0.0953387615629636	1	5.68181818181818e-10	58	265	678	FALSE	FALSE	1.04033974884969e-28	2.08067949769938e-28	95038992	rs10509681
chr10_95253548_C_G	X27.GSE9006_TYPE_1_VS_TYPE_2_DIABETES_PBMC_AT_DX_UP_PLIER_integrated	chr10_95040017_T_C	chr10_95253548_C_G	X27.GSE9006_TYPE_1_VS_TYPE_2_DIABETES_PBMC_AT_DX_UP_PLIER_integrated_CL_0002057_LPS_2h_chr10_95253548_C_G_cs_1	928	0.00309497059270802	-4.57269288829433	1	X27.GSE9006_TYPE_1_VS_TYPE_2_DIABETES_PBMC_AT_DX_UP	PLIER	integrated	CL_0002057_LPS_2h	chr10	2.82649942194336e-08	0.0953387615629636	1	5.68181818181818e-10	58	265	678	FALSE	FALSE	1.04033974884969e-28	2.08067949769938e-28	95040017	rs11572169
chr10_95253548_C_G	X27.GSE9006_TYPE_1_VS_TYPE_2_DIABETES_PBMC_AT_DX_UP_PLIER_integrated	chr10_95042415_A_T	chr10_95253548_C_G	X27.GSE9006_TYPE_1_VS_TYPE_2_DIABETES_PBMC_AT_DX_UP_PLIER_integrated_CL_0002057_LPS_2h_chr10_95253548_C_G_cs_1	938	0.00309497059270802	-4.57269288829433	1	X27.GSE9006_TYPE_1_VS_TYPE_2_DIABETES_PBMC_AT_DX_UP	PLIER	integrated	CL_0002057_LPS_2h	chr10	2.82649942194336e-08	0.0953387615629636	1	5.68181818181818e-10	58	265	678	FALSE	FALSE	1.04033974884969e-28	2.08067949769938e-28	95042415	rs11572168
chr10_95253548_C_G	X27.GSE9006_TYPE_1_VS_TYPE_2_DIABETES_PBMC_AT_DX_UP_PLIER_integrated	chr10_95043864_G_GCACACA	chr10_95253548_C_G	X27.GSE9006_TYPE_1_VS_TYPE_2_DIABETES_PBMC_AT_DX_UP_PLIER_integrated_CL_0002057_LPS_2h_chr10_95253548_C_G_cs_1	941	0.00445482936683372	-4.7688567916431	1	X27.GSE9006_TYPE_1_VS_TYPE_2_DIABETES_PBMC_AT_DX_UP	PLIER	integrated	CL_0002057_LPS_2h	chr10	2.82649942194336e-08	0.0953387615629636	1	5.68181818181818e-10	58	265	678	FALSE	FALSE	1.04033974884969e-28	2.08067949769938e-28	95043864
chr10_95253548_C_G	X27.GSE9006_TYPE_1_VS_TYPE_2_DIABETES_PBMC_AT_DX_UP_PLIER_integrated	chr10_95045333_G_C	chr10_95253548_C_G	X27.GSE9006_TYPE_1_VS_TYPE_2_DIABETES_PBMC_AT_DX_UP_PLIER_integrated_CL_0002057_LPS_2h_chr10_95253548_C_G_cs_1	947	0.00309497059270802	-4.57269288829433	1	X27.GSE9006_TYPE_1_VS_TYPE_2_DIABETES_PBMC_AT_DX_UP	PLIER	integrated	CL_0002057_LPS_2h	chr10	2.82649942194336e-08	0.0953387615629636	1	5.68181818181818e-10	58	265	678	FALSE	FALSE	1.04033974884969e-28	2.08067949769938e-28	95045333	rs11188153
chr10_95253548_C_G	X27.GSE9006_TYPE_1_VS_TYPE_2_DIABETES_PBMC_AT_DX_UP_PLIER_integrated	chr10_95046276_G_C	chr10_95253548_C_G	X27.GSE9006_TYPE_1_VS_TYPE_2_DIABETES_PBMC_AT_DX_UP_PLIER_integrated_CL_0002057_LPS_2h_chr10_95253548_C_G_cs_1	949	0.00309497059270802	-4.57269288829433	1	X27.GSE9006_TYPE_1_VS_TYPE_2_DIABETES_PBMC_AT_DX_UP	PLIER	integrated	CL_0002057_LPS_2h	chr10	2.82649942194336e-08	0.0953387615629636	1	5.68181818181818e-10	58	265	678	FALSE	FALSE	1.04033974884969e-28	2.08067949769938e-28	95046276	rs11188154
chr10_95253548_C_G	X27.GSE9006_TYPE_1_VS_TYPE_2_DIABETES_PBMC_AT_DX_UP_PLIER_integrated	chr10_95047371_G_T	chr10_95253548_C_G	X27.GSE9006_TYPE_1_VS_TYPE_2_DIABETES_PBMC_AT_DX_UP_PLIER_integrated_CL_0002057_LPS_2h_chr10_95253548_C_G_cs_1	952	0.00309497059270802	-4.57269288829433	1	X27.GSE9006_TYPE_1_VS_TYPE_2_DIABETES_PBMC_AT_DX_UP	PLIER	integrated	CL_0002057_LPS_2h	chr10	2.82649942194336e-08	0.0953387615629636	1	5.68181818181818e-10	58	265	678	FALSE	FALSE	1.04033974884969e-28	2.08067949769938e-28	95047371	rs11572150
chr10_95253548_C_G	X27.GSE9006_TYPE_1_VS_TYPE_2_DIABETES_PBMC_AT_DX_UP_PLIER_integrated	chr10_95050069_G_A	chr10_95253548_C_G	X27.GSE9006_TYPE_1_VS_TYPE_2_DIABETES_PBMC_AT_DX_UP_PLIER_integrated_CL_0002057_LPS_2h_chr10_95253548_C_G_cs_1	960	0.00309497059270802	-4.57269288829433	1	X27.GSE9006_TYPE_1_VS_TYPE_2_DIABETES_PBMC_AT_DX_UP	PLIER	integrated	CL_0002057_LPS_2h	chr10	2.82649942194336e-08	0.0953387615629636	1	5.68181818181818e-10	58	265	678	FALSE	FALSE	1.04033974884969e-28	2.08067949769938e-28	95050069	rs11572128
chr10_95253548_C_G	X27.GSE9006_TYPE_1_VS_TYPE_2_DIABETES_PBMC_AT_DX_UP_PLIER_integrated	chr10_95050911_C_T	chr10_95253548_C_G	X27.GSE9006_TYPE_1_VS_TYPE_2_DIABETES_PBMC_AT_DX_UP_PLIER_integrated_CL_0002057_LPS_2h_chr10_95253548_C_G_cs_1	966	0.00309497059270802	-4.57269288829433	1	X27.GSE9006_TYPE_1_VS_TYPE_2_DIABETES_PBMC_AT_DX_UP	PLIER	integrated	CL_0002057_LPS_2h	chr10	2.82649942194336e-08	0.0953387615629636	1	5.68181818181818e-10	58	265	678	FALSE	FALSE	1.04033974884969e-28	2.08067949769938e-28	95050911	rs56028148
chr10_95253548_C_G	X27.GSE9006_TYPE_1_VS_TYPE_2_DIABETES_PBMC_AT_DX_UP_PLIER_integrated	chr10_95055803_C_T	chr10_95253548_C_G	X27.GSE9006_TYPE_1_VS_TYPE_2_DIABETES_PBMC_AT_DX_UP_PLIER_integrated_CL_0002057_LPS_2h_chr10_95253548_C_G_cs_1	991	0.00309497059270802	-4.57269288829433	1	X27.GSE9006_TYPE_1_VS_TYPE_2_DIABETES_PBMC_AT_DX_UP	PLIER	integrated	CL_0002057_LPS_2h	chr10	2.82649942194336e-08	0.0953387615629636	1	5.68181818181818e-10	58	265	678	FALSE	FALSE	1.04033974884969e-28	2.08067949769938e-28	95055803	rs11572116
chr10_95253548_C_G	X27.GSE9006_TYPE_1_VS_TYPE_2_DIABETES_PBMC_AT_DX_UP_PLIER_integrated	chr10_95057476_C_T	chr10_95253548_C_G	X27.GSE9006_TYPE_1_VS_TYPE_2_DIABETES_PBMC_AT_DX_UP_PLIER_integrated_CL_0002057_LPS_2h_chr10_95253548_C_G_cs_1	997	0.00309497059270802	-4.57269288829433	1	X27.GSE9006_TYPE_1_VS_TYPE_2_DIABETES_PBMC_AT_DX_UP	PLIER	integrated	CL_0002057_LPS_2h	chr10	2.82649942194336e-08	0.0953387615629636	1	5.68181818181818e-10	58	265	678	FALSE	FALSE	1.04033974884969e-28	2.08067949769938e-28	95057476	rs11572107
chr10_95253548_C_G	X27.GSE9006_TYPE_1_VS_TYPE_2_DIABETES_PBMC_AT_DX_UP_PLIER_integrated	chr10_95061010_A_G	chr10_95253548_C_G	X27.GSE9006_TYPE_1_VS_TYPE_2_DIABETES_PBMC_AT_DX_UP_PLIER_integrated_CL_0002057_LPS_2h_chr10_95253548_C_G_cs_1	1019	0.00309497059270802	-4.57269288829433	1	X27.GSE9006_TYPE_1_VS_TYPE_2_DIABETES_PBMC_AT_DX_UP	PLIER	integrated	CL_0002057_LPS_2h	chr10	2.82649942194336e-08	0.0953387615629636	1	5.68181818181818e-10	58	265	678	FALSE	FALSE	1.04033974884969e-28	2.08067949769938e-28	95061010	rs11591385
chr10_95253548_C_G	X27.GSE9006_TYPE_1_VS_TYPE_2_DIABETES_PBMC_AT_DX_UP_PLIER_integrated	chr10_95061528_C_T	chr10_95253548_C_G	X27.GSE9006_TYPE_1_VS_TYPE_2_DIABETES_PBMC_AT_DX_UP_PLIER_integrated_CL_0002057_LPS_2h_chr10_95253548_C_G_cs_1	1022	0.00309497059270802	-4.57269288829433	1	X27.GSE9006_TYPE_1_VS_TYPE_2_DIABETES_PBMC_AT_DX_UP	PLIER	integrated	CL_0002057_LPS_2h	chr10	2.82649942194336e-08	0.0953387615629636	1	5.68181818181818e-10	58	265	678	FALSE	FALSE	1.04033974884969e-28	2.08067949769938e-28	95061528	rs117530387
chr10_95253548_C_G	X27.GSE9006_TYPE_1_VS_TYPE_2_DIABETES_PBMC_AT_DX_UP_PLIER_integrated	chr10_95062526_A_G	chr10_95253548_C_G	X27.GSE9006_TYPE_1_VS_TYPE_2_DIABETES_PBMC_AT_DX_UP_PLIER_integrated_CL_0002057_LPS_2h_chr10_95253548_C_G_cs_1	1023	0.00309497059270802	-4.57269288829433	1	X27.GSE9006_TYPE_1_VS_TYPE_2_DIABETES_PBMC_AT_DX_UP	PLIER	integrated	CL_0002057_LPS_2h	chr10	2.82649942194336e-08	0.0953387615629636	1	5.68181818181818e-10	58	265	678	FALSE	FALSE	1.04033974884969e-28	2.08067949769938e-28	95062526	rs142308077
chr10_95253548_C_G	X27.GSE9006_TYPE_1_VS_TYPE_2_DIABETES_PBMC_AT_DX_UP_PLIER_integrated	chr10_95064055_C_A	chr10_95253548_C_G	X27.GSE9006_TYPE_1_VS_TYPE_2_DIABETES_PBMC_AT_DX_UP_PLIER_integrated_CL_0002057_LPS_2h_chr10_95253548_C_G_cs_1	1032	0.00309497059270802	-4.57269288829433	1	X27.GSE9006_TYPE_1_VS_TYPE_2_DIABETES_PBMC_AT_DX_UP	PLIER	integrated	CL_0002057_LPS_2h	chr10	2.82649942194336e-08	0.0953387615629636	1	5.68181818181818e-10	58	265	678	FALSE	FALSE	1.04033974884969e-28	2.08067949769938e-28	95064055	rs111328885
chr10_95253548_C_G	X27.GSE9006_TYPE_1_VS_TYPE_2_DIABETES_PBMC_AT_DX_UP_PLIER_integrated	chr10_95064503_C_A	chr10_95253548_C_G	X27.GSE9006_TYPE_1_VS_TYPE_2_DIABETES_PBMC_AT_DX_UP_PLIER_integrated_CL_0002057_LPS_2h_chr10_95253548_C_G_cs_1	1037	0.00309497059270802	-4.57269288829433	1	X27.GSE9006_TYPE_1_VS_TYPE_2_DIABETES_PBMC_AT_DX_UP	PLIER	integrated	CL_0002057_LPS_2h	chr10	2.82649942194336e-08	0.0953387615629636	1	5.68181818181818e-10	58	265	678	FALSE	FALSE	1.04033974884969e-28	2.08067949769938e-28	95064503	rs11572094
chr10_95253548_C_G	X27.GSE9006_TYPE_1_VS_TYPE_2_DIABETES_PBMC_AT_DX_UP_PLIER_integrated	chr10_95067165_C_G	chr10_95253548_C_G	X27.GSE9006_TYPE_1_VS_TYPE_2_DIABETES_PBMC_AT_DX_UP_PLIER_integrated_CL_0002057_LPS_2h_chr10_95253548_C_G_cs_1	1045	0.00309497059270802	-4.57269288829433	1	X27.GSE9006_TYPE_1_VS_TYPE_2_DIABETES_PBMC_AT_DX_UP	PLIER	integrated	CL_0002057_LPS_2h	chr10	2.82649942194336e-08	0.0953387615629636	1	5.68181818181818e-10	58	265	678	FALSE	FALSE	1.04033974884969e-28	2.08067949769938e-28	95067165
chr10_95253548_C_G	X27.GSE9006_TYPE_1_VS_TYPE_2_DIABETES_PBMC_AT_DX_UP_PLIER_integrated	chr10_95067273_C_T	chr10_95253548_C_G	X27.GSE9006_TYPE_1_VS_TYPE_2_DIABETES_PBMC_AT_DX_UP_PLIER_integrated_CL_0002057_LPS_2h_chr10_95253548_C_G_cs_1	1046	0.00309497059270802	-4.57269288829433	1	X27.GSE9006_TYPE_1_VS_TYPE_2_DIABETES_PBMC_AT_DX_UP	PLIER	integrated	CL_0002057_LPS_2h	chr10	2.82649942194336e-08	0.0953387615629636	1	5.68181818181818e-10	58	265	678	FALSE	FALSE	1.04033974884969e-28	2.08067949769938e-28	95067273
chr10_95253548_C_G	X27.GSE9006_TYPE_1_VS_TYPE_2_DIABETES_PBMC_AT_DX_UP_PLIER_integrated	chr10_95070035_AAT_A	chr10_95253548_C_G	X27.GSE9006_TYPE_1_VS_TYPE_2_DIABETES_PBMC_AT_DX_UP_PLIER_integrated_CL_0002057_LPS_2h_chr10_95253548_C_G_cs_1	1054	0.00293986972662041	-4.51424846202483	1	X27.GSE9006_TYPE_1_VS_TYPE_2_DIABETES_PBMC_AT_DX_UP	PLIER	integrated	CL_0002057_LPS_2h	chr10	2.82649942194336e-08	0.0953387615629636	1	5.68181818181818e-10	58	265	678	FALSE	FALSE	1.04033974884969e-28	2.08067949769938e-28	95070035	rs372775254
chr10_95253548_C_G	F20_PEER_integrated	chr10_95070035_AAT_A	chr10_95260180_G_T	F20_PEER_integrated_CL_0002057_LPS_24h_chr10_95260180_G_T_cs_1	1033	0.00318636614883028	4.66761467614043	1	F20	PEER	integrated	CL_0002057_LPS_24h	chr10	2.85254588050849e-08	0.758452466439159	1	1.02040816326531e-09	48	574	1131	FALSE	FALSE	0.018980720760344	0.0379614415206881	95070035	rs372775254
chr10_95253548_C_G	F20_PEER_integrated	chr10_95070609_C_T	chr10_95260180_G_T	F20_PEER_integrated_CL_0002057_LPS_24h_chr10_95260180_G_T_cs_1	1034	0.00318636614883028	4.66761467614043	1	F20	PEER	integrated	CL_0002057_LPS_24h	chr10	2.85254588050849e-08	0.758452466439159	1	1.02040816326531e-09	48	574	1131	FALSE	FALSE	0.018980720760344	0.0379614415206881	95070609	rs11572064
chr10_95253548_C_G	X27.GSE9006_TYPE_1_VS_TYPE_2_DIABETES_PBMC_AT_DX_UP_PLIER_integrated	chr10_95070609_C_T	chr10_95253548_C_G	X27.GSE9006_TYPE_1_VS_TYPE_2_DIABETES_PBMC_AT_DX_UP_PLIER_integrated_CL_0002057_LPS_2h_chr10_95253548_C_G_cs_1	1055	0.00293986972662041	-4.51424846202483	1	X27.GSE9006_TYPE_1_VS_TYPE_2_DIABETES_PBMC_AT_DX_UP	PLIER	integrated	CL_0002057_LPS_2h	chr10	2.82649942194336e-08	0.0953387615629636	1	5.68181818181818e-10	58	265	678	FALSE	FALSE	1.04033974884969e-28	2.08067949769938e-28	95070609	rs11572064
chr10_95253548_C_G	F20_PEER_integrated	chr10_95075177_G_C	chr10_95260180_G_T	F20_PEER_integrated_CL_0002057_LPS_24h_chr10_95260180_G_T_cs_1	1045	0.00318636614883028	4.66761467614043	1	F20	PEER	integrated	CL_0002057_LPS_24h	chr10	2.85254588050849e-08	0.758452466439159	1	1.02040816326531e-09	48	574	1131	FALSE	FALSE	0.018980720760344	0.0379614415206881	95075177	rs72820608
chr10_95253548_C_G	X27.GSE9006_TYPE_1_VS_TYPE_2_DIABETES_PBMC_AT_DX_UP_PLIER_integrated	chr10_95075177_G_C	chr10_95253548_C_G	X27.GSE9006_TYPE_1_VS_TYPE_2_DIABETES_PBMC_AT_DX_UP_PLIER_integrated_CL_0002057_LPS_2h_chr10_95253548_C_G_cs_1	1066	0.00293986972662041	-4.51424846202483	1	X27.GSE9006_TYPE_1_VS_TYPE_2_DIABETES_PBMC_AT_DX_UP	PLIER	integrated	CL_0002057_LPS_2h	chr10	2.82649942194336e-08	0.0953387615629636	1	5.68181818181818e-10	58	265	678	FALSE	FALSE	1.04033974884969e-28	2.08067949769938e-28	95075177	rs72820608
chr10_95253548_C_G	F20_PEER_integrated	chr10_95076742_GAGCTTGGAA_G	chr10_95260180_G_T	F20_PEER_integrated_CL_0002057_LPS_24h_chr10_95260180_G_T_cs_1	1052	0.00318636614883028	4.66761467614043	1	F20	PEER	integrated	CL_0002057_LPS_24h	chr10	2.85254588050849e-08	0.758452466439159	1	1.02040816326531e-09	48	574	1131	FALSE	FALSE	0.018980720760344	0.0379614415206881	95076742	rs150342438
chr10_95253548_C_G	X27.GSE9006_TYPE_1_VS_TYPE_2_DIABETES_PBMC_AT_DX_UP_PLIER_integrated	chr10_95076742_GAGCTTGGAA_G	chr10_95253548_C_G	X27.GSE9006_TYPE_1_VS_TYPE_2_DIABETES_PBMC_AT_DX_UP_PLIER_integrated_CL_0002057_LPS_2h_chr10_95253548_C_G_cs_1	1073	0.00293986972662041	-4.51424846202483	1	X27.GSE9006_TYPE_1_VS_TYPE_2_DIABETES_PBMC_AT_DX_UP	PLIER	integrated	CL_0002057_LPS_2h	chr10	2.82649942194336e-08	0.0953387615629636	1	5.68181818181818e-10	58	265	678	FALSE	FALSE	1.04033974884969e-28	2.08067949769938e-28	95076742	rs150342438
chr10_95253548_C_G	X27.GSE9006_TYPE_1_VS_TYPE_2_DIABETES_PBMC_AT_DX_UP_PLIER_integrated	chr10_95079664_C_T	chr10_95253548_C_G	X27.GSE9006_TYPE_1_VS_TYPE_2_DIABETES_PBMC_AT_DX_UP_PLIER_integrated_CL_0002057_LPS_2h_chr10_95253548_C_G_cs_1	1083	0.00293986972662041	-4.51424846202483	1	X27.GSE9006_TYPE_1_VS_TYPE_2_DIABETES_PBMC_AT_DX_UP	PLIER	integrated	CL_0002057_LPS_2h	chr10	2.82649942194336e-08	0.0953387615629636	1	5.68181818181818e-10	58	265	678	FALSE	FALSE	1.04033974884969e-28	2.08067949769938e-28	95079664	rs182771228
chr10_95253548_C_G	F20_PEER_integrated	chr10_95079664_C_T	chr10_95260180_G_T	F20_PEER_integrated_CL_0002057_LPS_24h_chr10_95260180_G_T_cs_1	1062	0.00318636614883028	4.66761467614043	1	F20	PEER	integrated	CL_0002057_LPS_24h	chr10	2.85254588050849e-08	0.758452466439159	1	1.02040816326531e-09	48	574	1131	FALSE	FALSE	0.018980720760344	0.0379614415206881	95079664	rs182771228
chr10_95253548_C_G	X27.GSE9006_TYPE_1_VS_TYPE_2_DIABETES_PBMC_AT_DX_UP_PLIER_integrated	chr10_95079764_A_G	chr10_95253548_C_G	X27.GSE9006_TYPE_1_VS_TYPE_2_DIABETES_PBMC_AT_DX_UP_PLIER_integrated_CL_0002057_LPS_2h_chr10_95253548_C_G_cs_1	1084	0.00293986972662041	-4.51424846202483	1	X27.GSE9006_TYPE_1_VS_TYPE_2_DIABETES_PBMC_AT_DX_UP	PLIER	integrated	CL_0002057_LPS_2h	chr10	2.82649942194336e-08	0.0953387615629636	1	5.68181818181818e-10	58	265	678	FALSE	FALSE	1.04033974884969e-28	2.08067949769938e-28	95079764	rs145720632
chr10_95253548_C_G	F20_PEER_integrated	chr10_95079764_A_G	chr10_95260180_G_T	F20_PEER_integrated_CL_0002057_LPS_24h_chr10_95260180_G_T_cs_1	1063	0.00318636614883028	4.66761467614043	1	F20	PEER	integrated	CL_0002057_LPS_24h	chr10	2.85254588050849e-08	0.758452466439159	1	1.02040816326531e-09	48	574	1131	FALSE	FALSE	0.018980720760344	0.0379614415206881	95079764	rs145720632
chr10_95253548_C_G	F20_PEER_integrated	chr10_95080278_C_T	chr10_95260180_G_T	F20_PEER_integrated_CL_0002057_LPS_24h_chr10_95260180_G_T_cs_1	1065	0.00318636614883028	4.66761467614043	1	F20	PEER	integrated	CL_0002057_LPS_24h	chr10	2.85254588050849e-08	0.758452466439159	1	1.02040816326531e-09	48	574	1131	FALSE	FALSE	0.018980720760344	0.0379614415206881	95080278	rs182566136
chr10_95253548_C_G	F20_PEER_integrated	chr10_95080479_G_A	chr10_95260180_G_T	F20_PEER_integrated_CL_0002057_LPS_24h_chr10_95260180_G_T_cs_1	1067	0.00318636614883028	4.66761467614043	1	F20	PEER	integrated	CL_0002057_LPS_24h	chr10	2.85254588050849e-08	0.758452466439159	1	1.02040816326531e-09	48	574	1131	FALSE	FALSE	0.018980720760344	0.0379614415206881	95080479	rs147642774
chr10_95253548_C_G	F20_PEER_integrated	chr10_95081567_G_C	chr10_95260180_G_T	F20_PEER_integrated_CL_0002057_LPS_24h_chr10_95260180_G_T_cs_1	1072	0.00318636614883028	4.66761467614043	1	F20	PEER	integrated	CL_0002057_LPS_24h	chr10	2.85254588050849e-08	0.758452466439159	1	1.02040816326531e-09	48	574	1131	FALSE	FALSE	0.018980720760344	0.0379614415206881	95081567	rs542798166
chr10_95253548_C_G	F20_PEER_integrated	chr10_95082097_A_G	chr10_95260180_G_T	F20_PEER_integrated_CL_0002057_LPS_24h_chr10_95260180_G_T_cs_1	1078	0.00318636614883028	4.66761467614043	1	F20	PEER	integrated	CL_0002057_LPS_24h	chr10	2.85254588050849e-08	0.758452466439159	1	1.02040816326531e-09	48	574	1131	FALSE	FALSE	0.018980720760344	0.0379614415206881	95082097	rs28880704
chr10_95253548_C_G	F20_PEER_integrated	chr10_95083231_G_A	chr10_95260180_G_T	F20_PEER_integrated_CL_0002057_LPS_24h_chr10_95260180_G_T_cs_1	1079	0.00300480048293195	4.63553003755758	1	F20	PEER	integrated	CL_0002057_LPS_24h	chr10	2.85254588050849e-08	0.758452466439159	1	1.02040816326531e-09	48	574	1131	FALSE	FALSE	0.018980720760344	0.0379614415206881	95083231	rs28877664
chr10_95253548_C_G	F20_PEER_integrated	chr10_95083906_A_T	chr10_95260180_G_T	F20_PEER_integrated_CL_0002057_LPS_24h_chr10_95260180_G_T_cs_1	1082	0.00300480048293195	4.63553003755758	1	F20	PEER	integrated	CL_0002057_LPS_24h	chr10	2.85254588050849e-08	0.758452466439159	1	1.02040816326531e-09	48	574	1131	FALSE	FALSE	0.018980720760344	0.0379614415206881	95083906
chr10_95253548_C_G	F20_PEER_integrated	chr10_95084588_T_G	chr10_95260180_G_T	F20_PEER_integrated_CL_0002057_LPS_24h_chr10_95260180_G_T_cs_1	1084	0.00300480048293195	4.63553003755758	1	F20	PEER	integrated	CL_0002057_LPS_24h	chr10	2.85254588050849e-08	0.758452466439159	1	1.02040816326531e-09	48	574	1131	FALSE	FALSE	0.018980720760344	0.0379614415206881	95084588	rs28874702
chr10_95253548_C_G	F20_PEER_integrated	chr10_95087768_G_A	chr10_95260180_G_T	F20_PEER_integrated_CL_0002057_LPS_24h_chr10_95260180_G_T_cs_1	1097	0.00300480048293195	4.63553003755758	1	F20	PEER	integrated	CL_0002057_LPS_24h	chr10	2.85254588050849e-08	0.758452466439159	1	1.02040816326531e-09	48	574	1131	FALSE	FALSE	0.018980720760344	0.0379614415206881	95087768	rs11593816
chr10_95253548_C_G	F20_PEER_integrated	chr10_95088992_A_T	chr10_95260180_G_T	F20_PEER_integrated_CL_0002057_LPS_24h_chr10_95260180_G_T_cs_1	1099	0.00300480048293195	4.63553003755758	1	F20	PEER	integrated	CL_0002057_LPS_24h	chr10	2.85254588050849e-08	0.758452466439159	1	1.02040816326531e-09	48	574	1131	FALSE	FALSE	0.018980720760344	0.0379614415206881	95088992	rs11598823
chr10_95253548_C_G	F20_PEER_integrated	chr10_95090032_C_A	chr10_95260180_G_T	F20_PEER_integrated_CL_0002057_LPS_24h_chr10_95260180_G_T_cs_1	1103	0.00300480048293195	4.63553003755758	1	F20	PEER	integrated	CL_0002057_LPS_24h	chr10	2.85254588050849e-08	0.758452466439159	1	1.02040816326531e-09	48	574	1131	FALSE	FALSE	0.018980720760344	0.0379614415206881	95090032	rs151181543
chr10_95253548_C_G	F20_PEER_integrated	chr10_95090481_A_G	chr10_95260180_G_T	F20_PEER_integrated_CL_0002057_LPS_24h_chr10_95260180_G_T_cs_1	1105	0.00300480048293195	4.63553003755758	1	F20	PEER	integrated	CL_0002057_LPS_24h	chr10	2.85254588050849e-08	0.758452466439159	1	1.02040816326531e-09	48	574	1131	FALSE	FALSE	0.018980720760344	0.0379614415206881	95090481	rs78355334
chr10_95253548_C_G	F20_PEER_integrated	chr10_95090753_A_C	chr10_95260180_G_T	F20_PEER_integrated_CL_0002057_LPS_24h_chr10_95260180_G_T_cs_1	1107	0.00300480048293195	4.63553003755758	1	F20	PEER	integrated	CL_0002057_LPS_24h	chr10	2.85254588050849e-08	0.758452466439159	1	1.02040816326531e-09	48	574	1131	FALSE	FALSE	0.018980720760344	0.0379614415206881	95090753	rs113608784
chr10_95253548_C_G	F20_PEER_integrated	chr10_95091520_A_G	chr10_95260180_G_T	F20_PEER_integrated_CL_0002057_LPS_24h_chr10_95260180_G_T_cs_1	1110	0.00300480048293195	4.63553003755758	1	F20	PEER	integrated	CL_0002057_LPS_24h	chr10	2.85254588050849e-08	0.758452466439159	1	1.02040816326531e-09	48	574	1131	FALSE	FALSE	0.018980720760344	0.0379614415206881	95091520
chr10_95253548_C_G	X27.GSE9006_TYPE_1_VS_TYPE_2_DIABETES_PBMC_AT_DX_UP_PLIER_integrated	chr10_95098932_G_C	chr10_95253548_C_G	X27.GSE9006_TYPE_1_VS_TYPE_2_DIABETES_PBMC_AT_DX_UP_PLIER_integrated_CL_0002057_LPS_2h_chr10_95253548_C_G_cs_1	1163	0.00292313848810788	-4.51109146165059	1	X27.GSE9006_TYPE_1_VS_TYPE_2_DIABETES_PBMC_AT_DX_UP	PLIER	integrated	CL_0002057_LPS_2h	chr10	2.82649942194336e-08	0.0953387615629636	1	5.68181818181818e-10	58	265	678	FALSE	FALSE	1.04033974884969e-28	2.08067949769938e-28	95098932
chr10_95253548_C_G	X27.GSE9006_TYPE_1_VS_TYPE_2_DIABETES_PBMC_AT_DX_UP_PLIER_integrated	chr10_95099837_A_G	chr10_95253548_C_G	X27.GSE9006_TYPE_1_VS_TYPE_2_DIABETES_PBMC_AT_DX_UP_PLIER_integrated_CL_0002057_LPS_2h_chr10_95253548_C_G_cs_1	1167	0.00292313848810788	-4.51109146165059	1	X27.GSE9006_TYPE_1_VS_TYPE_2_DIABETES_PBMC_AT_DX_UP	PLIER	integrated	CL_0002057_LPS_2h	chr10	2.82649942194336e-08	0.0953387615629636	1	5.68181818181818e-10	58	265	678	FALSE	FALSE	1.04033974884969e-28	2.08067949769938e-28	95099837	rs36175551
chr10_95253548_C_G	X27.GSE9006_TYPE_1_VS_TYPE_2_DIABETES_PBMC_AT_DX_UP_PLIER_integrated	chr10_95102164_T_C	chr10_95253548_C_G	X27.GSE9006_TYPE_1_VS_TYPE_2_DIABETES_PBMC_AT_DX_UP_PLIER_integrated_CL_0002057_LPS_2h_chr10_95253548_C_G_cs_1	1176	0.00292313848810788	-4.51109146165059	1	X27.GSE9006_TYPE_1_VS_TYPE_2_DIABETES_PBMC_AT_DX_UP	PLIER	integrated	CL_0002057_LPS_2h	chr10	2.82649942194336e-08	0.0953387615629636	1	5.68181818181818e-10	58	265	678	FALSE	FALSE	1.04033974884969e-28	2.08067949769938e-28	95102164	rs35564280
chr10_95253548_C_G	X27.GSE9006_TYPE_1_VS_TYPE_2_DIABETES_PBMC_AT_DX_UP_PLIER_integrated	chr10_95105376_G_A	chr10_95253548_C_G	X27.GSE9006_TYPE_1_VS_TYPE_2_DIABETES_PBMC_AT_DX_UP_PLIER_integrated_CL_0002057_LPS_2h_chr10_95253548_C_G_cs_1	1191	0.00292313848810788	-4.51109146165059	1	X27.GSE9006_TYPE_1_VS_TYPE_2_DIABETES_PBMC_AT_DX_UP	PLIER	integrated	CL_0002057_LPS_2h	chr10	2.82649942194336e-08	0.0953387615629636	1	5.68181818181818e-10	58	265	678	FALSE	FALSE	1.04033974884969e-28	2.08067949769938e-28	95105376	rs34672152
chr10_95253548_C_G	X27.GSE9006_TYPE_1_VS_TYPE_2_DIABETES_PBMC_AT_DX_UP_PLIER_integrated	chr10_95108665_C_T	chr10_95253548_C_G	X27.GSE9006_TYPE_1_VS_TYPE_2_DIABETES_PBMC_AT_DX_UP_PLIER_integrated_CL_0002057_LPS_2h_chr10_95253548_C_G_cs_1	1197	0.00371861670422302	-4.62183613816305	1	X27.GSE9006_TYPE_1_VS_TYPE_2_DIABETES_PBMC_AT_DX_UP	PLIER	integrated	CL_0002057_LPS_2h	chr10	2.82649942194336e-08	0.0953387615629636	1	5.68181818181818e-10	58	265	678	FALSE	FALSE	1.04033974884969e-28	2.08067949769938e-28	95108665	rs145765554
chr10_95253548_C_G	X27.GSE9006_TYPE_1_VS_TYPE_2_DIABETES_PBMC_AT_DX_UP_PLIER_integrated	chr10_95116382_T_C	chr10_95253548_C_G	X27.GSE9006_TYPE_1_VS_TYPE_2_DIABETES_PBMC_AT_DX_UP_PLIER_integrated_CL_0002057_LPS_2h_chr10_95253548_C_G_cs_1	1222	0.00292313848810788	-4.51109146165059	1	X27.GSE9006_TYPE_1_VS_TYPE_2_DIABETES_PBMC_AT_DX_UP	PLIER	integrated	CL_0002057_LPS_2h	chr10	2.82649942194336e-08	0.0953387615629636	1	5.68181818181818e-10	58	265	678	FALSE	FALSE	1.04033974884969e-28	2.08067949769938e-28	95116382	rs67918795
chr10_95253548_C_G	X27.GSE9006_TYPE_1_VS_TYPE_2_DIABETES_PBMC_AT_DX_UP_PLIER_integrated	chr10_95117681_G_C	chr10_95253548_C_G	X27.GSE9006_TYPE_1_VS_TYPE_2_DIABETES_PBMC_AT_DX_UP_PLIER_integrated_CL_0002057_LPS_2h_chr10_95253548_C_G_cs_1	1225	0.00292313848810788	-4.51109146165059	1	X27.GSE9006_TYPE_1_VS_TYPE_2_DIABETES_PBMC_AT_DX_UP	PLIER	integrated	CL_0002057_LPS_2h	chr10	2.82649942194336e-08	0.0953387615629636	1	5.68181818181818e-10	58	265	678	FALSE	FALSE	1.04033974884969e-28	2.08067949769938e-28	95117681	rs72820645
chr10_95253548_C_G	X27.GSE9006_TYPE_1_VS_TYPE_2_DIABETES_PBMC_AT_DX_UP_PLIER_integrated	chr10_95122875_C_T	chr10_95253548_C_G	X27.GSE9006_TYPE_1_VS_TYPE_2_DIABETES_PBMC_AT_DX_UP_PLIER_integrated_CL_0002057_LPS_2h_chr10_95253548_C_G_cs_1	1240	0.00292313848810788	-4.51109146165059	1	X27.GSE9006_TYPE_1_VS_TYPE_2_DIABETES_PBMC_AT_DX_UP	PLIER	integrated	CL_0002057_LPS_2h	chr10	2.82649942194336e-08	0.0953387615629636	1	5.68181818181818e-10	58	265	678	FALSE	FALSE	1.04033974884969e-28	2.08067949769938e-28	95122875	rs34254643
chr10_95253548_C_G	F20_PEER_integrated	chr10_95122875_C_T	chr10_95260180_G_T	F20_PEER_integrated_CL_0002057_LPS_24h_chr10_95260180_G_T_cs_1	1219	0.00318722543522043	4.62834579127489	1	F20	PEER	integrated	CL_0002057_LPS_24h	chr10	2.85254588050849e-08	0.758452466439159	1	1.02040816326531e-09	48	574	1131	FALSE	FALSE	0.018980720760344	0.0379614415206881	95122875	rs34254643
chr10_95253548_C_G	X27.GSE9006_TYPE_1_VS_TYPE_2_DIABETES_PBMC_AT_DX_UP_PLIER_integrated	chr10_95126375_A_G	chr10_95253548_C_G	X27.GSE9006_TYPE_1_VS_TYPE_2_DIABETES_PBMC_AT_DX_UP_PLIER_integrated_CL_0002057_LPS_2h_chr10_95253548_C_G_cs_1	1246	0.00292313848810788	-4.51109146165059	1	X27.GSE9006_TYPE_1_VS_TYPE_2_DIABETES_PBMC_AT_DX_UP	PLIER	integrated	CL_0002057_LPS_2h	chr10	2.82649942194336e-08	0.0953387615629636	1	5.68181818181818e-10	58	265	678	FALSE	FALSE	1.04033974884969e-28	2.08067949769938e-28	95126375	rs67851687
chr10_95253548_C_G	F20_PEER_integrated	chr10_95126375_A_G	chr10_95260180_G_T	F20_PEER_integrated_CL_0002057_LPS_24h_chr10_95260180_G_T_cs_1	1225	0.00318722543522043	4.62834579127489	1	F20	PEER	integrated	CL_0002057_LPS_24h	chr10	2.85254588050849e-08	0.758452466439159	1	1.02040816326531e-09	48	574	1131	FALSE	FALSE	0.018980720760344	0.0379614415206881	95126375	rs67851687
chr10_95253548_C_G	X27.GSE9006_TYPE_1_VS_TYPE_2_DIABETES_PBMC_AT_DX_UP_PLIER_integrated	chr10_95126551_G_A	chr10_95253548_C_G	X27.GSE9006_TYPE_1_VS_TYPE_2_DIABETES_PBMC_AT_DX_UP_PLIER_integrated_CL_0002057_LPS_2h_chr10_95253548_C_G_cs_1	1247	0.00292313848810788	-4.51109146165059	1	X27.GSE9006_TYPE_1_VS_TYPE_2_DIABETES_PBMC_AT_DX_UP	PLIER	integrated	CL_0002057_LPS_2h	chr10	2.82649942194336e-08	0.0953387615629636	1	5.68181818181818e-10	58	265	678	FALSE	FALSE	1.04033974884969e-28	2.08067949769938e-28	95126551	rs35238981
chr10_95253548_C_G	F20_PEER_integrated	chr10_95126551_G_A	chr10_95260180_G_T	F20_PEER_integrated_CL_0002057_LPS_24h_chr10_95260180_G_T_cs_1	1226	0.00318722543522043	4.62834579127489	1	F20	PEER	integrated	CL_0002057_LPS_24h	chr10	2.85254588050849e-08	0.758452466439159	1	1.02040816326531e-09	48	574	1131	FALSE	FALSE	0.018980720760344	0.0379614415206881	95126551	rs35238981
chr10_95253548_C_G	F20_PEER_integrated	chr10_95126582_G_A	chr10_95260180_G_T	F20_PEER_integrated_CL_0002057_LPS_24h_chr10_95260180_G_T_cs_1	1227	0.00318722543522043	4.62834579127489	1	F20	PEER	integrated	CL_0002057_LPS_24h	chr10	2.85254588050849e-08	0.758452466439159	1	1.02040816326531e-09	48	574	1131	FALSE	FALSE	0.018980720760344	0.0379614415206881	95126582
chr10_95253548_C_G	X27.GSE9006_TYPE_1_VS_TYPE_2_DIABETES_PBMC_AT_DX_UP_PLIER_integrated	chr10_95126582_G_A	chr10_95253548_C_G	X27.GSE9006_TYPE_1_VS_TYPE_2_DIABETES_PBMC_AT_DX_UP_PLIER_integrated_CL_0002057_LPS_2h_chr10_95253548_C_G_cs_1	1248	0.00292313848810788	-4.51109146165059	1	X27.GSE9006_TYPE_1_VS_TYPE_2_DIABETES_PBMC_AT_DX_UP	PLIER	integrated	CL_0002057_LPS_2h	chr10	2.82649942194336e-08	0.0953387615629636	1	5.68181818181818e-10	58	265	678	FALSE	FALSE	1.04033974884969e-28	2.08067949769938e-28	95126582
chr10_95253548_C_G	X27.GSE9006_TYPE_1_VS_TYPE_2_DIABETES_PBMC_AT_DX_UP_PLIER_integrated	chr10_95131967_T_G	chr10_95253548_C_G	X27.GSE9006_TYPE_1_VS_TYPE_2_DIABETES_PBMC_AT_DX_UP_PLIER_integrated_CL_0002057_LPS_2h_chr10_95253548_C_G_cs_1	1268	0.00292313848810788	-4.51109146165059	1	X27.GSE9006_TYPE_1_VS_TYPE_2_DIABETES_PBMC_AT_DX_UP	PLIER	integrated	CL_0002057_LPS_2h	chr10	2.82649942194336e-08	0.0953387615629636	1	5.68181818181818e-10	58	265	678	FALSE	FALSE	1.04033974884969e-28	2.08067949769938e-28	95131967
chr10_95253548_C_G	F20_PEER_integrated	chr10_95131967_T_G	chr10_95260180_G_T	F20_PEER_integrated_CL_0002057_LPS_24h_chr10_95260180_G_T_cs_1	1247	0.00318722543522043	4.62834579127489	1	F20	PEER	integrated	CL_0002057_LPS_24h	chr10	2.85254588050849e-08	0.758452466439159	1	1.02040816326531e-09	48	574	1131	FALSE	FALSE	0.018980720760344	0.0379614415206881	95131967
chr10_95253548_C_G	X27.GSE9006_TYPE_1_VS_TYPE_2_DIABETES_PBMC_AT_DX_UP_PLIER_integrated	chr10_95138333_G_A	chr10_95253548_C_G	X27.GSE9006_TYPE_1_VS_TYPE_2_DIABETES_PBMC_AT_DX_UP_PLIER_integrated_CL_0002057_LPS_2h_chr10_95253548_C_G_cs_1	1293	0.00339320181269054	-4.63841800638253	1	X27.GSE9006_TYPE_1_VS_TYPE_2_DIABETES_PBMC_AT_DX_UP	PLIER	integrated	CL_0002057_LPS_2h	chr10	2.82649942194336e-08	0.0953387615629636	1	5.68181818181818e-10	58	265	678	FALSE	FALSE	1.04033974884969e-28	2.08067949769938e-28	95138333	rs113363603
chr10_95253548_C_G	X27.GSE9006_TYPE_1_VS_TYPE_2_DIABETES_PBMC_AT_DX_UP_PLIER_integrated	chr10_95139142_G_A	chr10_95253548_C_G	X27.GSE9006_TYPE_1_VS_TYPE_2_DIABETES_PBMC_AT_DX_UP_PLIER_integrated_CL_0002057_LPS_2h_chr10_95253548_C_G_cs_1	1296	0.00339320181269054	-4.63841800638253	1	X27.GSE9006_TYPE_1_VS_TYPE_2_DIABETES_PBMC_AT_DX_UP	PLIER	integrated	CL_0002057_LPS_2h	chr10	2.82649942194336e-08	0.0953387615629636	1	5.68181818181818e-10	58	265	678	FALSE	FALSE	1.04033974884969e-28	2.08067949769938e-28	95139142	rs12780333
chr10_95253548_C_G	X27.GSE9006_TYPE_1_VS_TYPE_2_DIABETES_PBMC_AT_DX_UP_PLIER_integrated	chr10_95139793_A_G	chr10_95253548_C_G	X27.GSE9006_TYPE_1_VS_TYPE_2_DIABETES_PBMC_AT_DX_UP_PLIER_integrated_CL_0002057_LPS_2h_chr10_95253548_C_G_cs_1	1299	0.00339320181269054	-4.63841800638253	1	X27.GSE9006_TYPE_1_VS_TYPE_2_DIABETES_PBMC_AT_DX_UP	PLIER	integrated	CL_0002057_LPS_2h	chr10	2.82649942194336e-08	0.0953387615629636	1	5.68181818181818e-10	58	265	678	FALSE	FALSE	1.04033974884969e-28	2.08067949769938e-28	95139793	rs36168663
chr10_95253548_C_G	X27.GSE9006_TYPE_1_VS_TYPE_2_DIABETES_PBMC_AT_DX_UP_PLIER_integrated	chr10_95140253_A_G	chr10_95253548_C_G	X27.GSE9006_TYPE_1_VS_TYPE_2_DIABETES_PBMC_AT_DX_UP_PLIER_integrated_CL_0002057_LPS_2h_chr10_95253548_C_G_cs_1	1301	0.00339320181269054	-4.63841800638253	1	X27.GSE9006_TYPE_1_VS_TYPE_2_DIABETES_PBMC_AT_DX_UP	PLIER	integrated	CL_0002057_LPS_2h	chr10	2.82649942194336e-08	0.0953387615629636	1	5.68181818181818e-10	58	265	678	FALSE	FALSE	1.04033974884969e-28	2.08067949769938e-28	95140253	rs12762602
chr10_95253548_C_G	X27.GSE9006_TYPE_1_VS_TYPE_2_DIABETES_PBMC_AT_DX_UP_PLIER_integrated	chr10_95142210_T_A	chr10_95253548_C_G	X27.GSE9006_TYPE_1_VS_TYPE_2_DIABETES_PBMC_AT_DX_UP_PLIER_integrated_CL_0002057_LPS_2h_chr10_95253548_C_G_cs_1	1307	0.00339320181269054	-4.63841800638253	1	X27.GSE9006_TYPE_1_VS_TYPE_2_DIABETES_PBMC_AT_DX_UP	PLIER	integrated	CL_0002057_LPS_2h	chr10	2.82649942194336e-08	0.0953387615629636	1	5.68181818181818e-10	58	265	678	FALSE	FALSE	1.04033974884969e-28	2.08067949769938e-28	95142210	rs35883122
chr10_95253548_C_G	X27.GSE9006_TYPE_1_VS_TYPE_2_DIABETES_PBMC_AT_DX_UP_PLIER_integrated	chr10_95145957_A_T	chr10_95253548_C_G	X27.GSE9006_TYPE_1_VS_TYPE_2_DIABETES_PBMC_AT_DX_UP_PLIER_integrated_CL_0002057_LPS_2h_chr10_95253548_C_G_cs_1	1321	0.00339320181269054	-4.63841800638253	1	X27.GSE9006_TYPE_1_VS_TYPE_2_DIABETES_PBMC_AT_DX_UP	PLIER	integrated	CL_0002057_LPS_2h	chr10	2.82649942194336e-08	0.0953387615629636	1	5.68181818181818e-10	58	265	678	FALSE	FALSE	1.04033974884969e-28	2.08067949769938e-28	95145957	rs17523627
chr10_95253548_C_G	X27.GSE9006_TYPE_1_VS_TYPE_2_DIABETES_PBMC_AT_DX_UP_PLIER_integrated	chr10_95147885_C_G	chr10_95253548_C_G	X27.GSE9006_TYPE_1_VS_TYPE_2_DIABETES_PBMC_AT_DX_UP_PLIER_integrated_CL_0002057_LPS_2h_chr10_95253548_C_G_cs_1	1330	0.00339320181269054	-4.63841800638253	1	X27.GSE9006_TYPE_1_VS_TYPE_2_DIABETES_PBMC_AT_DX_UP	PLIER	integrated	CL_0002057_LPS_2h	chr10	2.82649942194336e-08	0.0953387615629636	1	5.68181818181818e-10	58	265	678	FALSE	FALSE	1.04033974884969e-28	2.08067949769938e-28	95147885	rs113757057
chr10_95253548_C_G	X27.GSE9006_TYPE_1_VS_TYPE_2_DIABETES_PBMC_AT_DX_UP_PLIER_integrated	chr10_95148661_G_A	chr10_95253548_C_G	X27.GSE9006_TYPE_1_VS_TYPE_2_DIABETES_PBMC_AT_DX_UP_PLIER_integrated_CL_0002057_LPS_2h_chr10_95253548_C_G_cs_1	1336	0.00339320181269054	-4.63841800638253	1	X27.GSE9006_TYPE_1_VS_TYPE_2_DIABETES_PBMC_AT_DX_UP	PLIER	integrated	CL_0002057_LPS_2h	chr10	2.82649942194336e-08	0.0953387615629636	1	5.68181818181818e-10	58	265	678	FALSE	FALSE	1.04033974884969e-28	2.08067949769938e-28	95148661	rs137944858
chr10_95253548_C_G	X27.GSE9006_TYPE_1_VS_TYPE_2_DIABETES_PBMC_AT_DX_UP_PLIER_integrated	chr10_95149117_G_T	chr10_95253548_C_G	X27.GSE9006_TYPE_1_VS_TYPE_2_DIABETES_PBMC_AT_DX_UP_PLIER_integrated_CL_0002057_LPS_2h_chr10_95253548_C_G_cs_1	1343	0.00339320181269054	-4.63841800638253	1	X27.GSE9006_TYPE_1_VS_TYPE_2_DIABETES_PBMC_AT_DX_UP	PLIER	integrated	CL_0002057_LPS_2h	chr10	2.82649942194336e-08	0.0953387615629636	1	5.68181818181818e-10	58	265	678	FALSE	FALSE	1.04033974884969e-28	2.08067949769938e-28	95149117	rs71482337
chr10_95253548_C_G	X27.GSE9006_TYPE_1_VS_TYPE_2_DIABETES_PBMC_AT_DX_UP_PLIER_integrated	chr10_95149517_A_G	chr10_95253548_C_G	X27.GSE9006_TYPE_1_VS_TYPE_2_DIABETES_PBMC_AT_DX_UP_PLIER_integrated_CL_0002057_LPS_2h_chr10_95253548_C_G_cs_1	1347	0.00339320181269054	-4.63841800638253	1	X27.GSE9006_TYPE_1_VS_TYPE_2_DIABETES_PBMC_AT_DX_UP	PLIER	integrated	CL_0002057_LPS_2h	chr10	2.82649942194336e-08	0.0953387615629636	1	5.68181818181818e-10	58	265	678	FALSE	FALSE	1.04033974884969e-28	2.08067949769938e-28	95149517	rs111609323
chr10_95253548_C_G	X27.GSE9006_TYPE_1_VS_TYPE_2_DIABETES_PBMC_AT_DX_UP_PLIER_integrated	chr10_95150419_C_G	chr10_95253548_C_G	X27.GSE9006_TYPE_1_VS_TYPE_2_DIABETES_PBMC_AT_DX_UP_PLIER_integrated_CL_0002057_LPS_2h_chr10_95253548_C_G_cs_1	1351	0.00339320181269054	-4.63841800638253	1	X27.GSE9006_TYPE_1_VS_TYPE_2_DIABETES_PBMC_AT_DX_UP	PLIER	integrated	CL_0002057_LPS_2h	chr10	2.82649942194336e-08	0.0953387615629636	1	5.68181818181818e-10	58	265	678	FALSE	FALSE	1.04033974884969e-28	2.08067949769938e-28	95150419	rs79534645
chr10_95253548_C_G	X27.GSE9006_TYPE_1_VS_TYPE_2_DIABETES_PBMC_AT_DX_UP_PLIER_integrated	chr10_95152028_T_C	chr10_95253548_C_G	X27.GSE9006_TYPE_1_VS_TYPE_2_DIABETES_PBMC_AT_DX_UP_PLIER_integrated_CL_0002057_LPS_2h_chr10_95253548_C_G_cs_1	1361	0.00339320181269054	-4.63841800638253	1	X27.GSE9006_TYPE_1_VS_TYPE_2_DIABETES_PBMC_AT_DX_UP	PLIER	integrated	CL_0002057_LPS_2h	chr10	2.82649942194336e-08	0.0953387615629636	1	5.68181818181818e-10	58	265	678	FALSE	FALSE	1.04033974884969e-28	2.08067949769938e-28	95152028	rs71482339
chr10_95253548_C_G	X27.GSE9006_TYPE_1_VS_TYPE_2_DIABETES_PBMC_AT_DX_UP_PLIER_integrated	chr10_95152191_A_T	chr10_95253548_C_G	X27.GSE9006_TYPE_1_VS_TYPE_2_DIABETES_PBMC_AT_DX_UP_PLIER_integrated_CL_0002057_LPS_2h_chr10_95253548_C_G_cs_1	1362	0.00339320181269054	-4.63841800638253	1	X27.GSE9006_TYPE_1_VS_TYPE_2_DIABETES_PBMC_AT_DX_UP	PLIER	integrated	CL_0002057_LPS_2h	chr10	2.82649942194336e-08	0.0953387615629636	1	5.68181818181818e-10	58	265	678	FALSE	FALSE	1.04033974884969e-28	2.08067949769938e-28	95152191	rs76178697
chr10_95253548_C_G	X27.GSE9006_TYPE_1_VS_TYPE_2_DIABETES_PBMC_AT_DX_UP_PLIER_integrated	chr10_95152588_A_C	chr10_95253548_C_G	X27.GSE9006_TYPE_1_VS_TYPE_2_DIABETES_PBMC_AT_DX_UP_PLIER_integrated_CL_0002057_LPS_2h_chr10_95253548_C_G_cs_1	1365	0.00339320181269054	-4.63841800638253	1	X27.GSE9006_TYPE_1_VS_TYPE_2_DIABETES_PBMC_AT_DX_UP	PLIER	integrated	CL_0002057_LPS_2h	chr10	2.82649942194336e-08	0.0953387615629636	1	5.68181818181818e-10	58	265	678	FALSE	FALSE	1.04033974884969e-28	2.08067949769938e-28	95152588
chr10_95253548_C_G	X27.GSE9006_TYPE_1_VS_TYPE_2_DIABETES_PBMC_AT_DX_UP_PLIER_integrated	chr10_95152703_C_A	chr10_95253548_C_G	X27.GSE9006_TYPE_1_VS_TYPE_2_DIABETES_PBMC_AT_DX_UP_PLIER_integrated_CL_0002057_LPS_2h_chr10_95253548_C_G_cs_1	1366	0.00339320181269054	-4.63841800638253	1	X27.GSE9006_TYPE_1_VS_TYPE_2_DIABETES_PBMC_AT_DX_UP	PLIER	integrated	CL_0002057_LPS_2h	chr10	2.82649942194336e-08	0.0953387615629636	1	5.68181818181818e-10	58	265	678	FALSE	FALSE	1.04033974884969e-28	2.08067949769938e-28	95152703
chr10_95253548_C_G	X27.GSE9006_TYPE_1_VS_TYPE_2_DIABETES_PBMC_AT_DX_UP_PLIER_integrated	chr10_95154486_A_T	chr10_95253548_C_G	X27.GSE9006_TYPE_1_VS_TYPE_2_DIABETES_PBMC_AT_DX_UP_PLIER_integrated_CL_0002057_LPS_2h_chr10_95253548_C_G_cs_1	1374	0.00339320181269054	-4.63841800638253	1	X27.GSE9006_TYPE_1_VS_TYPE_2_DIABETES_PBMC_AT_DX_UP	PLIER	integrated	CL_0002057_LPS_2h	chr10	2.82649942194336e-08	0.0953387615629636	1	5.68181818181818e-10	58	265	678	FALSE	FALSE	1.04033974884969e-28	2.08067949769938e-28	95154486	rs141243615
chr10_95253548_C_G	X27.GSE9006_TYPE_1_VS_TYPE_2_DIABETES_PBMC_AT_DX_UP_PLIER_integrated	chr10_95155439_T_A	chr10_95253548_C_G	X27.GSE9006_TYPE_1_VS_TYPE_2_DIABETES_PBMC_AT_DX_UP_PLIER_integrated_CL_0002057_LPS_2h_chr10_95253548_C_G_cs_1	1379	0.00339320181269054	-4.63841800638253	1	X27.GSE9006_TYPE_1_VS_TYPE_2_DIABETES_PBMC_AT_DX_UP	PLIER	integrated	CL_0002057_LPS_2h	chr10	2.82649942194336e-08	0.0953387615629636	1	5.68181818181818e-10	58	265	678	FALSE	FALSE	1.04033974884969e-28	2.08067949769938e-28	95155439
chr10_95253548_C_G	X27.GSE9006_TYPE_1_VS_TYPE_2_DIABETES_PBMC_AT_DX_UP_PLIER_integrated	chr10_95155707_A_G	chr10_95253548_C_G	X27.GSE9006_TYPE_1_VS_TYPE_2_DIABETES_PBMC_AT_DX_UP_PLIER_integrated_CL_0002057_LPS_2h_chr10_95253548_C_G_cs_1	1380	0.00339320181269054	-4.63841800638253	1	X27.GSE9006_TYPE_1_VS_TYPE_2_DIABETES_PBMC_AT_DX_UP	PLIER	integrated	CL_0002057_LPS_2h	chr10	2.82649942194336e-08	0.0953387615629636	1	5.68181818181818e-10	58	265	678	FALSE	FALSE	1.04033974884969e-28	2.08067949769938e-28	95155707	rs145454639
chr10_95253548_C_G	X27.GSE9006_TYPE_1_VS_TYPE_2_DIABETES_PBMC_AT_DX_UP_PLIER_integrated	chr10_95158810_G_C	chr10_95253548_C_G	X27.GSE9006_TYPE_1_VS_TYPE_2_DIABETES_PBMC_AT_DX_UP_PLIER_integrated_CL_0002057_LPS_2h_chr10_95253548_C_G_cs_1	1395	0.00339320181269054	-4.63841800638253	1	X27.GSE9006_TYPE_1_VS_TYPE_2_DIABETES_PBMC_AT_DX_UP	PLIER	integrated	CL_0002057_LPS_2h	chr10	2.82649942194336e-08	0.0953387615629636	1	5.68181818181818e-10	58	265	678	FALSE	FALSE	1.04033974884969e-28	2.08067949769938e-28	95158810
chr10_95253548_C_G	X27.GSE9006_TYPE_1_VS_TYPE_2_DIABETES_PBMC_AT_DX_UP_PLIER_integrated	chr10_95160915_G_C	chr10_95253548_C_G	X27.GSE9006_TYPE_1_VS_TYPE_2_DIABETES_PBMC_AT_DX_UP_PLIER_integrated_CL_0002057_LPS_2h_chr10_95253548_C_G_cs_1	1403	0.00339320181269054	-4.63841800638253	1	X27.GSE9006_TYPE_1_VS_TYPE_2_DIABETES_PBMC_AT_DX_UP	PLIER	integrated	CL_0002057_LPS_2h	chr10	2.82649942194336e-08	0.0953387615629636	1	5.68181818181818e-10	58	265	678	FALSE	FALSE	1.04033974884969e-28	2.08067949769938e-28	95160915	rs66648066
chr10_95253548_C_G	X27.GSE9006_TYPE_1_VS_TYPE_2_DIABETES_PBMC_AT_DX_UP_PLIER_integrated	chr10_95168140_T_C	chr10_95253548_C_G	X27.GSE9006_TYPE_1_VS_TYPE_2_DIABETES_PBMC_AT_DX_UP_PLIER_integrated_CL_0002057_LPS_2h_chr10_95253548_C_G_cs_1	1423	0.00339320181269054	-4.63841800638253	1	X27.GSE9006_TYPE_1_VS_TYPE_2_DIABETES_PBMC_AT_DX_UP	PLIER	integrated	CL_0002057_LPS_2h	chr10	2.82649942194336e-08	0.0953387615629636	1	5.68181818181818e-10	58	265	678	FALSE	FALSE	1.04033974884969e-28	2.08067949769938e-28	95168140	rs12774244
chr10_95253548_C_G	X27.GSE9006_TYPE_1_VS_TYPE_2_DIABETES_PBMC_AT_DX_UP_PLIER_integrated	chr10_95170284_C_CA	chr10_95253548_C_G	X27.GSE9006_TYPE_1_VS_TYPE_2_DIABETES_PBMC_AT_DX_UP_PLIER_integrated_CL_0002057_LPS_2h_chr10_95253548_C_G_cs_1	1430	0.00339320181269054	-4.63841800638253	1	X27.GSE9006_TYPE_1_VS_TYPE_2_DIABETES_PBMC_AT_DX_UP	PLIER	integrated	CL_0002057_LPS_2h	chr10	2.82649942194336e-08	0.0953387615629636	1	5.68181818181818e-10	58	265	678	FALSE	FALSE	1.04033974884969e-28	2.08067949769938e-28	95170284	rs143517502; rs35160010
chr10_95253548_C_G	X27.GSE9006_TYPE_1_VS_TYPE_2_DIABETES_PBMC_AT_DX_UP_PLIER_integrated	chr10_95170580_C_G	chr10_95253548_C_G	X27.GSE9006_TYPE_1_VS_TYPE_2_DIABETES_PBMC_AT_DX_UP_PLIER_integrated_CL_0002057_LPS_2h_chr10_95253548_C_G_cs_1	1431	0.00339320181269054	-4.63841800638253	1	X27.GSE9006_TYPE_1_VS_TYPE_2_DIABETES_PBMC_AT_DX_UP	PLIER	integrated	CL_0002057_LPS_2h	chr10	2.82649942194336e-08	0.0953387615629636	1	5.68181818181818e-10	58	265	678	FALSE	FALSE	1.04033974884969e-28	2.08067949769938e-28	95170580	rs12763201
chr10_95253548_C_G	X27.GSE9006_TYPE_1_VS_TYPE_2_DIABETES_PBMC_AT_DX_UP_PLIER_integrated	chr10_95177120_T_TA	chr10_95253548_C_G	X27.GSE9006_TYPE_1_VS_TYPE_2_DIABETES_PBMC_AT_DX_UP_PLIER_integrated_CL_0002057_LPS_2h_chr10_95253548_C_G_cs_1	1459	0.00339320181269054	-4.63841800638253	1	X27.GSE9006_TYPE_1_VS_TYPE_2_DIABETES_PBMC_AT_DX_UP	PLIER	integrated	CL_0002057_LPS_2h	chr10	2.82649942194336e-08	0.0953387615629636	1	5.68181818181818e-10	58	265	678	FALSE	FALSE	1.04033974884969e-28	2.08067949769938e-28	95177120	rs143334042; rs398038538
chr10_95253548_C_G	X27.GSE9006_TYPE_1_VS_TYPE_2_DIABETES_PBMC_AT_DX_UP_PLIER_integrated	chr10_95179416_T_A	chr10_95253548_C_G	X27.GSE9006_TYPE_1_VS_TYPE_2_DIABETES_PBMC_AT_DX_UP_PLIER_integrated_CL_0002057_LPS_2h_chr10_95253548_C_G_cs_1	1463	0.00339320181269054	-4.63841800638253	1	X27.GSE9006_TYPE_1_VS_TYPE_2_DIABETES_PBMC_AT_DX_UP	PLIER	integrated	CL_0002057_LPS_2h	chr10	2.82649942194336e-08	0.0953387615629636	1	5.68181818181818e-10	58	265	678	FALSE	FALSE	1.04033974884969e-28	2.08067949769938e-28	95179416	rs67728892
chr10_95253548_C_G	X27.GSE9006_TYPE_1_VS_TYPE_2_DIABETES_PBMC_AT_DX_UP_PLIER_integrated	chr10_95182233_T_A	chr10_95253548_C_G	X27.GSE9006_TYPE_1_VS_TYPE_2_DIABETES_PBMC_AT_DX_UP_PLIER_integrated_CL_0002057_LPS_2h_chr10_95253548_C_G_cs_1	1467	0.00339320181269054	-4.63841800638253	1	X27.GSE9006_TYPE_1_VS_TYPE_2_DIABETES_PBMC_AT_DX_UP	PLIER	integrated	CL_0002057_LPS_2h	chr10	2.82649942194336e-08	0.0953387615629636	1	5.68181818181818e-10	58	265	678	FALSE	FALSE	1.04033974884969e-28	2.08067949769938e-28	95182233	rs36042065
chr10_95253548_C_G	X27.GSE9006_TYPE_1_VS_TYPE_2_DIABETES_PBMC_AT_DX_UP_PLIER_integrated	chr10_95184154_A_G	chr10_95253548_C_G	X27.GSE9006_TYPE_1_VS_TYPE_2_DIABETES_PBMC_AT_DX_UP_PLIER_integrated_CL_0002057_LPS_2h_chr10_95253548_C_G_cs_1	1478	0.00339320181269054	-4.63841800638253	1	X27.GSE9006_TYPE_1_VS_TYPE_2_DIABETES_PBMC_AT_DX_UP	PLIER	integrated	CL_0002057_LPS_2h	chr10	2.82649942194336e-08	0.0953387615629636	1	5.68181818181818e-10	58	265	678	FALSE	FALSE	1.04033974884969e-28	2.08067949769938e-28	95184154
chr10_95253548_C_G	X27.GSE9006_TYPE_1_VS_TYPE_2_DIABETES_PBMC_AT_DX_UP_PLIER_integrated	chr10_95188377_C_T	chr10_95253548_C_G	X27.GSE9006_TYPE_1_VS_TYPE_2_DIABETES_PBMC_AT_DX_UP_PLIER_integrated_CL_0002057_LPS_2h_chr10_95253548_C_G_cs_1	1486	0.00339320181269054	-4.63841800638253	1	X27.GSE9006_TYPE_1_VS_TYPE_2_DIABETES_PBMC_AT_DX_UP	PLIER	integrated	CL_0002057_LPS_2h	chr10	2.82649942194336e-08	0.0953387615629636	1	5.68181818181818e-10	58	265	678	FALSE	FALSE	1.04033974884969e-28	2.08067949769938e-28	95188377	rs34462937
chr10_95253548_C_G	X27.GSE9006_TYPE_1_VS_TYPE_2_DIABETES_PBMC_AT_DX_UP_PLIER_integrated	chr10_95192939_T_C	chr10_95253548_C_G	X27.GSE9006_TYPE_1_VS_TYPE_2_DIABETES_PBMC_AT_DX_UP_PLIER_integrated_CL_0002057_LPS_2h_chr10_95253548_C_G_cs_1	1495	0.00339320181269054	-4.63841800638253	1	X27.GSE9006_TYPE_1_VS_TYPE_2_DIABETES_PBMC_AT_DX_UP	PLIER	integrated	CL_0002057_LPS_2h	chr10	2.82649942194336e-08	0.0953387615629636	1	5.68181818181818e-10	58	265	678	FALSE	FALSE	1.04033974884969e-28	2.08067949769938e-28	95192939	rs35955220
chr10_95253548_C_G	F20_PEER_integrated	chr10_95197816_G_A	chr10_95260180_G_T	F20_PEER_integrated_CL_0002057_LPS_24h_chr10_95260180_G_T_cs_1	1497	0.00327751906220697	4.59781358376181	1	F20	PEER	integrated	CL_0002057_LPS_24h	chr10	2.85254588050849e-08	0.758452466439159	1	1.02040816326531e-09	48	574	1131	FALSE	FALSE	0.018980720760344	0.0379614415206881	95197816	rs12762652
chr10_95253548_C_G	X27.GSE9006_TYPE_1_VS_TYPE_2_DIABETES_PBMC_AT_DX_UP_PLIER_integrated	chr10_95198822_C_T	chr10_95253548_C_G	X27.GSE9006_TYPE_1_VS_TYPE_2_DIABETES_PBMC_AT_DX_UP_PLIER_integrated_CL_0002057_LPS_2h_chr10_95253548_C_G_cs_1	1523	0.00303278416434971	-4.53635704327117	1	X27.GSE9006_TYPE_1_VS_TYPE_2_DIABETES_PBMC_AT_DX_UP	PLIER	integrated	CL_0002057_LPS_2h	chr10	2.82649942194336e-08	0.0953387615629636	1	5.68181818181818e-10	58	265	678	FALSE	FALSE	1.04033974884969e-28	2.08067949769938e-28	95198822	rs34246390
chr10_95253548_C_G	F20_PEER_integrated	chr10_95198822_C_T	chr10_95260180_G_T	F20_PEER_integrated_CL_0002057_LPS_24h_chr10_95260180_G_T_cs_1	1502	0.00318082256460661	4.60277270791226	1	F20	PEER	integrated	CL_0002057_LPS_24h	chr10	2.85254588050849e-08	0.758452466439159	1	1.02040816326531e-09	48	574	1131	FALSE	FALSE	0.018980720760344	0.0379614415206881	95198822	rs34246390
chr10_95253548_C_G	X27.GSE9006_TYPE_1_VS_TYPE_2_DIABETES_PBMC_AT_DX_UP_PLIER_integrated	chr10_95199583_A_C	chr10_95253548_C_G	X27.GSE9006_TYPE_1_VS_TYPE_2_DIABETES_PBMC_AT_DX_UP_PLIER_integrated_CL_0002057_LPS_2h_chr10_95253548_C_G_cs_1	1525	0.00303278416434971	-4.53635704327117	1	X27.GSE9006_TYPE_1_VS_TYPE_2_DIABETES_PBMC_AT_DX_UP	PLIER	integrated	CL_0002057_LPS_2h	chr10	2.82649942194336e-08	0.0953387615629636	1	5.68181818181818e-10	58	265	678	FALSE	FALSE	1.04033974884969e-28	2.08067949769938e-28	95199583	rs12770470
chr10_95253548_C_G	F20_PEER_integrated	chr10_95199583_A_C	chr10_95260180_G_T	F20_PEER_integrated_CL_0002057_LPS_24h_chr10_95260180_G_T_cs_1	1504	0.00318082256460661	4.60277270791226	1	F20	PEER	integrated	CL_0002057_LPS_24h	chr10	2.85254588050849e-08	0.758452466439159	1	1.02040816326531e-09	48	574	1131	FALSE	FALSE	0.018980720760344	0.0379614415206881	95199583	rs12770470
chr10_95253548_C_G	X27.GSE9006_TYPE_1_VS_TYPE_2_DIABETES_PBMC_AT_DX_UP_PLIER_integrated	chr10_95209404_G_A	chr10_95253548_C_G	X27.GSE9006_TYPE_1_VS_TYPE_2_DIABETES_PBMC_AT_DX_UP_PLIER_integrated_CL_0002057_LPS_2h_chr10_95253548_C_G_cs_1	1549	0.00303278416434971	-4.53635704327117	1	X27.GSE9006_TYPE_1_VS_TYPE_2_DIABETES_PBMC_AT_DX_UP	PLIER	integrated	CL_0002057_LPS_2h	chr10	2.82649942194336e-08	0.0953387615629636	1	5.68181818181818e-10	58	265	678	FALSE	FALSE	1.04033974884969e-28	2.08067949769938e-28	95209404	rs17524348
chr10_95253548_C_G	F20_PEER_integrated	chr10_95209404_G_A	chr10_95260180_G_T	F20_PEER_integrated_CL_0002057_LPS_24h_chr10_95260180_G_T_cs_1	1528	0.00318082256460661	4.60277270791226	1	F20	PEER	integrated	CL_0002057_LPS_24h	chr10	2.85254588050849e-08	0.758452466439159	1	1.02040816326531e-09	48	574	1131	FALSE	FALSE	0.018980720760344	0.0379614415206881	95209404	rs17524348
chr10_95253548_C_G	F20_PEER_integrated	chr10_95223331_G_T	chr10_95260180_G_T	F20_PEER_integrated_CL_0002057_LPS_24h_chr10_95260180_G_T_cs_1	1575	0.00318082256460661	4.60277270791226	1	F20	PEER	integrated	CL_0002057_LPS_24h	chr10	2.85254588050849e-08	0.758452466439159	1	1.02040816326531e-09	48	574	1131	FALSE	FALSE	0.018980720760344	0.0379614415206881	95223331
chr10_95253548_C_G	X27.GSE9006_TYPE_1_VS_TYPE_2_DIABETES_PBMC_AT_DX_UP_PLIER_integrated	chr10_95223331_G_T	chr10_95253548_C_G	X27.GSE9006_TYPE_1_VS_TYPE_2_DIABETES_PBMC_AT_DX_UP_PLIER_integrated_CL_0002057_LPS_2h_chr10_95253548_C_G_cs_1	1596	0.00303278416434971	-4.53635704327117	1	X27.GSE9006_TYPE_1_VS_TYPE_2_DIABETES_PBMC_AT_DX_UP	PLIER	integrated	CL_0002057_LPS_2h	chr10	2.82649942194336e-08	0.0953387615629636	1	5.68181818181818e-10	58	265	678	FALSE	FALSE	1.04033974884969e-28	2.08067949769938e-28	95223331
chr10_95253548_C_G	X27.GSE9006_TYPE_1_VS_TYPE_2_DIABETES_PBMC_AT_DX_UP_PLIER_integrated	chr10_95228248_G_C	chr10_95253548_C_G	X27.GSE9006_TYPE_1_VS_TYPE_2_DIABETES_PBMC_AT_DX_UP_PLIER_integrated_CL_0002057_LPS_2h_chr10_95253548_C_G_cs_1	1618	0.00303278416434971	-4.53635704327117	1	X27.GSE9006_TYPE_1_VS_TYPE_2_DIABETES_PBMC_AT_DX_UP	PLIER	integrated	CL_0002057_LPS_2h	chr10	2.82649942194336e-08	0.0953387615629636	1	5.68181818181818e-10	58	265	678	FALSE	FALSE	1.04033974884969e-28	2.08067949769938e-28	95228248	rs17452671
chr10_95253548_C_G	F20_PEER_integrated	chr10_95228248_G_C	chr10_95260180_G_T	F20_PEER_integrated_CL_0002057_LPS_24h_chr10_95260180_G_T_cs_1	1597	0.00318082256460661	4.60277270791226	1	F20	PEER	integrated	CL_0002057_LPS_24h	chr10	2.85254588050849e-08	0.758452466439159	1	1.02040816326531e-09	48	574	1131	FALSE	FALSE	0.018980720760344	0.0379614415206881	95228248	rs17452671
chr10_95253548_C_G	X27.GSE9006_TYPE_1_VS_TYPE_2_DIABETES_PBMC_AT_DX_UP_PLIER_integrated	chr10_95228620_T_C	chr10_95253548_C_G	X27.GSE9006_TYPE_1_VS_TYPE_2_DIABETES_PBMC_AT_DX_UP_PLIER_integrated_CL_0002057_LPS_2h_chr10_95253548_C_G_cs_1	1620	0.00303278416434971	-4.53635704327117	1	X27.GSE9006_TYPE_1_VS_TYPE_2_DIABETES_PBMC_AT_DX_UP	PLIER	integrated	CL_0002057_LPS_2h	chr10	2.82649942194336e-08	0.0953387615629636	1	5.68181818181818e-10	58	265	678	FALSE	FALSE	1.04033974884969e-28	2.08067949769938e-28	95228620	rs17452714
chr10_95253548_C_G	F20_PEER_integrated	chr10_95228620_T_C	chr10_95260180_G_T	F20_PEER_integrated_CL_0002057_LPS_24h_chr10_95260180_G_T_cs_1	1599	0.00318082256460661	4.60277270791226	1	F20	PEER	integrated	CL_0002057_LPS_24h	chr10	2.85254588050849e-08	0.758452466439159	1	1.02040816326531e-09	48	574	1131	FALSE	FALSE	0.018980720760344	0.0379614415206881	95228620	rs17452714
chr10_95253548_C_G	F20_PEER_integrated	chr10_95231543_ACT_A	chr10_95260180_G_T	F20_PEER_integrated_CL_0002057_LPS_24h_chr10_95260180_G_T_cs_1	1608	0.00318082256460661	4.60277270791226	1	F20	PEER	integrated	CL_0002057_LPS_24h	chr10	2.85254588050849e-08	0.758452466439159	1	1.02040816326531e-09	48	574	1131	FALSE	FALSE	0.018980720760344	0.0379614415206881	95231543	rs199805226; rs71486752; rs869298982
chr10_95253548_C_G	X27.GSE9006_TYPE_1_VS_TYPE_2_DIABETES_PBMC_AT_DX_UP_PLIER_integrated	chr10_95231543_ACT_A	chr10_95253548_C_G	X27.GSE9006_TYPE_1_VS_TYPE_2_DIABETES_PBMC_AT_DX_UP_PLIER_integrated_CL_0002057_LPS_2h_chr10_95253548_C_G_cs_1	1629	0.00303278416434971	-4.53635704327117	1	X27.GSE9006_TYPE_1_VS_TYPE_2_DIABETES_PBMC_AT_DX_UP	PLIER	integrated	CL_0002057_LPS_2h	chr10	2.82649942194336e-08	0.0953387615629636	1	5.68181818181818e-10	58	265	678	FALSE	FALSE	1.04033974884969e-28	2.08067949769938e-28	95231543	rs199805226; rs71486752; rs869298982
chr10_95253548_C_G	X27.GSE9006_TYPE_1_VS_TYPE_2_DIABETES_PBMC_AT_DX_UP_PLIER_integrated	chr10_95231875_G_A	chr10_95253548_C_G	X27.GSE9006_TYPE_1_VS_TYPE_2_DIABETES_PBMC_AT_DX_UP_PLIER_integrated_CL_0002057_LPS_2h_chr10_95253548_C_G_cs_1	1633	0.00303278416434971	-4.53635704327117	1	X27.GSE9006_TYPE_1_VS_TYPE_2_DIABETES_PBMC_AT_DX_UP	PLIER	integrated	CL_0002057_LPS_2h	chr10	2.82649942194336e-08	0.0953387615629636	1	5.68181818181818e-10	58	265	678	FALSE	FALSE	1.04033974884969e-28	2.08067949769938e-28	95231875	rs35203700
chr10_95253548_C_G	F20_PEER_integrated	chr10_95231875_G_A	chr10_95260180_G_T	F20_PEER_integrated_CL_0002057_LPS_24h_chr10_95260180_G_T_cs_1	1612	0.00318082256460661	4.60277270791226	1	F20	PEER	integrated	CL_0002057_LPS_24h	chr10	2.85254588050849e-08	0.758452466439159	1	1.02040816326531e-09	48	574	1131	FALSE	FALSE	0.018980720760344	0.0379614415206881	95231875	rs35203700
chr10_95253548_C_G	X27.GSE9006_TYPE_1_VS_TYPE_2_DIABETES_PBMC_AT_DX_UP_PLIER_integrated	chr10_95232847_A_G	chr10_95253548_C_G	X27.GSE9006_TYPE_1_VS_TYPE_2_DIABETES_PBMC_AT_DX_UP_PLIER_integrated_CL_0002057_LPS_2h_chr10_95253548_C_G_cs_1	1636	0.00303278416434971	-4.53635704327117	1	X27.GSE9006_TYPE_1_VS_TYPE_2_DIABETES_PBMC_AT_DX_UP	PLIER	integrated	CL_0002057_LPS_2h	chr10	2.82649942194336e-08	0.0953387615629636	1	5.68181818181818e-10	58	265	678	FALSE	FALSE	1.04033974884969e-28	2.08067949769938e-28	95232847	rs67737822
chr10_95253548_C_G	F20_PEER_integrated	chr10_95232847_A_G	chr10_95260180_G_T	F20_PEER_integrated_CL_0002057_LPS_24h_chr10_95260180_G_T_cs_1	1615	0.00318082256460661	4.60277270791226	1	F20	PEER	integrated	CL_0002057_LPS_24h	chr10	2.85254588050849e-08	0.758452466439159	1	1.02040816326531e-09	48	574	1131	FALSE	FALSE	0.018980720760344	0.0379614415206881	95232847	rs67737822
chr10_95253548_C_G	X27.GSE9006_TYPE_1_VS_TYPE_2_DIABETES_PBMC_AT_DX_UP_PLIER_integrated	chr10_95234677_AC_A	chr10_95253548_C_G	X27.GSE9006_TYPE_1_VS_TYPE_2_DIABETES_PBMC_AT_DX_UP_PLIER_integrated_CL_0002057_LPS_2h_chr10_95253548_C_G_cs_1	1645	0.00599713035551352	-4.88109263980216	1	X27.GSE9006_TYPE_1_VS_TYPE_2_DIABETES_PBMC_AT_DX_UP	PLIER	integrated	CL_0002057_LPS_2h	chr10	2.82649942194336e-08	0.0953387615629636	1	5.68181818181818e-10	58	265	678	FALSE	FALSE	1.04033974884969e-28	2.08067949769938e-28	95234677	rs200620201
chr10_95253548_C_G	X27.GSE9006_TYPE_1_VS_TYPE_2_DIABETES_PBMC_AT_DX_UP_PLIER_integrated	chr10_95235852_C_T	chr10_95253548_C_G	X27.GSE9006_TYPE_1_VS_TYPE_2_DIABETES_PBMC_AT_DX_UP_PLIER_integrated_CL_0002057_LPS_2h_chr10_95253548_C_G_cs_1	1657	0.00599713035551352	-4.88109263980216	1	X27.GSE9006_TYPE_1_VS_TYPE_2_DIABETES_PBMC_AT_DX_UP	PLIER	integrated	CL_0002057_LPS_2h	chr10	2.82649942194336e-08	0.0953387615629636	1	5.68181818181818e-10	58	265	678	FALSE	FALSE	1.04033974884969e-28	2.08067949769938e-28	95235852	rs113661290
chr10_95253548_C_G	X27.GSE9006_TYPE_1_VS_TYPE_2_DIABETES_PBMC_AT_DX_UP_PLIER_integrated	chr10_95237183_A_G	chr10_95253548_C_G	X27.GSE9006_TYPE_1_VS_TYPE_2_DIABETES_PBMC_AT_DX_UP_PLIER_integrated_CL_0002057_LPS_2h_chr10_95253548_C_G_cs_1	1666	0.0105121729906865	-5.07737787603714	1	X27.GSE9006_TYPE_1_VS_TYPE_2_DIABETES_PBMC_AT_DX_UP	PLIER	integrated	CL_0002057_LPS_2h	chr10	2.82649942194336e-08	0.0953387615629636	1	5.68181818181818e-10	58	265	678	FALSE	FALSE	1.04033974884969e-28	2.08067949769938e-28	95237183	rs12763939
chr10_95253548_C_G	F20_PEER_integrated	chr10_95237183_A_G	chr10_95260180_G_T	F20_PEER_integrated_CL_0002057_LPS_24h_chr10_95260180_G_T_cs_1	1645	0.00290800021388549	4.6060344071066	1	F20	PEER	integrated	CL_0002057_LPS_24h	chr10	2.85254588050849e-08	0.758452466439159	1	1.02040816326531e-09	48	574	1131	FALSE	FALSE	0.018980720760344	0.0379614415206881	95237183	rs12763939
chr10_95253548_C_G	F20_PEER_integrated	chr10_95241382_T_C	chr10_95260180_G_T	F20_PEER_integrated_CL_0002057_LPS_24h_chr10_95260180_G_T_cs_1	1687	0.0388041551492536	5.45804291251497	1	F20	PEER	integrated	CL_0002057_LPS_24h	chr10	2.85254588050849e-08	0.758452466439159	1	1.02040816326531e-09	48	574	1131	FALSE	FALSE	0.018980720760344	0.0379614415206881	95241382	rs66816038
chr10_95253548_C_G	X27.GSE9006_TYPE_1_VS_TYPE_2_DIABETES_PBMC_AT_DX_UP_PLIER_integrated	chr10_95241382_T_C	chr10_95253548_C_G	X27.GSE9006_TYPE_1_VS_TYPE_2_DIABETES_PBMC_AT_DX_UP_PLIER_integrated_CL_0002057_LPS_2h_chr10_95253548_C_G_cs_1	1708	0.0147955446528892	-5.15478750225509	1	X27.GSE9006_TYPE_1_VS_TYPE_2_DIABETES_PBMC_AT_DX_UP	PLIER	integrated	CL_0002057_LPS_2h	chr10	2.82649942194336e-08	0.0953387615629636	1	5.68181818181818e-10	58	265	678	FALSE	FALSE	1.04033974884969e-28	2.08067949769938e-28	95241382	rs66816038
chr10_95253548_C_G	X27.GSE9006_TYPE_1_VS_TYPE_2_DIABETES_PBMC_AT_DX_UP_PLIER_integrated	chr10_95242983_T_TA	chr10_95253548_C_G	X27.GSE9006_TYPE_1_VS_TYPE_2_DIABETES_PBMC_AT_DX_UP_PLIER_integrated_CL_0002057_LPS_2h_chr10_95253548_C_G_cs_1	1721	0.0147955446528892	-5.15478750225509	1	X27.GSE9006_TYPE_1_VS_TYPE_2_DIABETES_PBMC_AT_DX_UP	PLIER	integrated	CL_0002057_LPS_2h	chr10	2.82649942194336e-08	0.0953387615629636	1	5.68181818181818e-10	58	265	678	FALSE	FALSE	1.04033974884969e-28	2.08067949769938e-28	95242983	rs45568835; rs34436170
chr10_95253548_C_G	F20_PEER_integrated	chr10_95242983_T_TA	chr10_95260180_G_T	F20_PEER_integrated_CL_0002057_LPS_24h_chr10_95260180_G_T_cs_1	1700	0.0388041551492536	5.45804291251497	1	F20	PEER	integrated	CL_0002057_LPS_24h	chr10	2.85254588050849e-08	0.758452466439159	1	1.02040816326531e-09	48	574	1131	FALSE	FALSE	0.018980720760344	0.0379614415206881	95242983	rs45568835; rs34436170
chr10_95253548_C_G	X27.GSE9006_TYPE_1_VS_TYPE_2_DIABETES_PBMC_AT_DX_UP_PLIER_integrated	chr10_95244141_C_T	chr10_95253548_C_G	X27.GSE9006_TYPE_1_VS_TYPE_2_DIABETES_PBMC_AT_DX_UP_PLIER_integrated_CL_0002057_LPS_2h_chr10_95253548_C_G_cs_1	1724	0.0147955446528892	-5.15478750225509	1	X27.GSE9006_TYPE_1_VS_TYPE_2_DIABETES_PBMC_AT_DX_UP	PLIER	integrated	CL_0002057_LPS_2h	chr10	2.82649942194336e-08	0.0953387615629636	1	5.68181818181818e-10	58	265	678	FALSE	FALSE	1.04033974884969e-28	2.08067949769938e-28	95244141	rs45523137
chr10_95253548_C_G	F20_PEER_integrated	chr10_95244141_C_T	chr10_95260180_G_T	F20_PEER_integrated_CL_0002057_LPS_24h_chr10_95260180_G_T_cs_1	1703	0.0388041551492536	5.45804291251497	1	F20	PEER	integrated	CL_0002057_LPS_24h	chr10	2.85254588050849e-08	0.758452466439159	1	1.02040816326531e-09	48	574	1131	FALSE	FALSE	0.018980720760344	0.0379614415206881	95244141	rs45523137
chr10_95253548_C_G	X27.GSE9006_TYPE_1_VS_TYPE_2_DIABETES_PBMC_AT_DX_UP_PLIER_integrated	chr10_95247046_C_CCT	chr10_95253548_C_G	X27.GSE9006_TYPE_1_VS_TYPE_2_DIABETES_PBMC_AT_DX_UP_PLIER_integrated_CL_0002057_LPS_2h_chr10_95253548_C_G_cs_1	1728	0.030642373497888	-5.34066083882916	1	X27.GSE9006_TYPE_1_VS_TYPE_2_DIABETES_PBMC_AT_DX_UP	PLIER	integrated	CL_0002057_LPS_2h	chr10	2.82649942194336e-08	0.0953387615629636	1	5.68181818181818e-10	58	265	678	FALSE	FALSE	1.04033974884969e-28	2.08067949769938e-28	95247046	rs755790399
chr10_95253548_C_G	F20_PEER_integrated	chr10_95247046_C_CCT	chr10_95260180_G_T	F20_PEER_integrated_CL_0002057_LPS_24h_chr10_95260180_G_T_cs_1	1707	0.0200404409668501	5.28769779076408	1	F20	PEER	integrated	CL_0002057_LPS_24h	chr10	2.85254588050849e-08	0.758452466439159	1	1.02040816326531e-09	48	574	1131	FALSE	FALSE	0.018980720760344	0.0379614415206881	95247046	rs755790399
chr10_95253548_C_G	F20_PEER_integrated	chr10_95247098_T_G	chr10_95260180_G_T	F20_PEER_integrated_CL_0002057_LPS_24h_chr10_95260180_G_T_cs_1	1708	0.0388918034338289	5.44132212647013	1	F20	PEER	integrated	CL_0002057_LPS_24h	chr10	2.85254588050849e-08	0.758452466439159	1	1.02040816326531e-09	48	574	1131	FALSE	FALSE	0.018980720760344	0.0379614415206881	95247098	rs17525659
chr10_95253548_C_G	X27.GSE9006_TYPE_1_VS_TYPE_2_DIABETES_PBMC_AT_DX_UP_PLIER_integrated	chr10_95247098_T_G	chr10_95253548_C_G	X27.GSE9006_TYPE_1_VS_TYPE_2_DIABETES_PBMC_AT_DX_UP_PLIER_integrated_CL_0002057_LPS_2h_chr10_95253548_C_G_cs_1	1729	0.0386527628516853	-5.39599408488561	1	X27.GSE9006_TYPE_1_VS_TYPE_2_DIABETES_PBMC_AT_DX_UP	PLIER	integrated	CL_0002057_LPS_2h	chr10	2.82649942194336e-08	0.0953387615629636	1	5.68181818181818e-10	58	265	678	FALSE	FALSE	1.04033974884969e-28	2.08067949769938e-28	95247098	rs17525659
chr10_95253548_C_G	X27.GSE9006_TYPE_1_VS_TYPE_2_DIABETES_PBMC_AT_DX_UP_PLIER_integrated	chr10_95249193_T_C	chr10_95253548_C_G	X27.GSE9006_TYPE_1_VS_TYPE_2_DIABETES_PBMC_AT_DX_UP_PLIER_integrated_CL_0002057_LPS_2h_chr10_95253548_C_G_cs_1	1730	0.0386527628516853	-5.39599408488561	1	X27.GSE9006_TYPE_1_VS_TYPE_2_DIABETES_PBMC_AT_DX_UP	PLIER	integrated	CL_0002057_LPS_2h	chr10	2.82649942194336e-08	0.0953387615629636	1	5.68181818181818e-10	58	265	678	FALSE	FALSE	1.04033974884969e-28	2.08067949769938e-28	95249193	rs45601238
chr10_95253548_C_G	F20_PEER_integrated	chr10_95249193_T_C	chr10_95260180_G_T	F20_PEER_integrated_CL_0002057_LPS_24h_chr10_95260180_G_T_cs_1	1709	0.038891803433829	5.44132212647013	1	F20	PEER	integrated	CL_0002057_LPS_24h	chr10	2.85254588050849e-08	0.758452466439159	1	1.02040816326531e-09	48	574	1131	FALSE	FALSE	0.018980720760344	0.0379614415206881	95249193	rs45601238
chr10_95253548_C_G	F20_PEER_integrated	chr10_95250752_A_G	chr10_95260180_G_T	F20_PEER_integrated_CL_0002057_LPS_24h_chr10_95260180_G_T_cs_1	1713	0.038891803433829	5.44132212647013	1	F20	PEER	integrated	CL_0002057_LPS_24h	chr10	2.85254588050849e-08	0.758452466439159	1	1.02040816326531e-09	48	574	1131	FALSE	FALSE	0.018980720760344	0.0379614415206881	95250752	rs17453533
chr10_95253548_C_G	X27.GSE9006_TYPE_1_VS_TYPE_2_DIABETES_PBMC_AT_DX_UP_PLIER_integrated	chr10_95250752_A_G	chr10_95253548_C_G	X27.GSE9006_TYPE_1_VS_TYPE_2_DIABETES_PBMC_AT_DX_UP_PLIER_integrated_CL_0002057_LPS_2h_chr10_95253548_C_G_cs_1	1734	0.0973849475966855	-5.61495013822266	1	X27.GSE9006_TYPE_1_VS_TYPE_2_DIABETES_PBMC_AT_DX_UP	PLIER	integrated	CL_0002057_LPS_2h	chr10	2.82649942194336e-08	0.0953387615629636	1	5.68181818181818e-10	58	265	678	FALSE	FALSE	1.04033974884969e-28	2.08067949769938e-28	95250752	rs17453533
chr10_95253548_C_G	X27.GSE9006_TYPE_1_VS_TYPE_2_DIABETES_PBMC_AT_DX_UP_PLIER_integrated	chr10_95252190_T_C	chr10_95253548_C_G	X27.GSE9006_TYPE_1_VS_TYPE_2_DIABETES_PBMC_AT_DX_UP_PLIER_integrated_CL_0002057_LPS_2h_chr10_95253548_C_G_cs_1	1739	0.0973849475966855	-5.61495013822266	1	X27.GSE9006_TYPE_1_VS_TYPE_2_DIABETES_PBMC_AT_DX_UP	PLIER	integrated	CL_0002057_LPS_2h	chr10	2.82649942194336e-08	0.0953387615629636	1	5.68181818181818e-10	58	265	678	FALSE	FALSE	1.04033974884969e-28	2.08067949769938e-28	95252190	rs45535939
chr10_95253548_C_G	F20_PEER_integrated	chr10_95252190_T_C	chr10_95260180_G_T	F20_PEER_integrated_CL_0002057_LPS_24h_chr10_95260180_G_T_cs_1	1718	0.038891803433829	5.44132212647013	1	F20	PEER	integrated	CL_0002057_LPS_24h	chr10	2.85254588050849e-08	0.758452466439159	1	1.02040816326531e-09	48	574	1131	FALSE	FALSE	0.018980720760344	0.0379614415206881	95252190	rs45535939
chr10_95253548_C_G	X27.GSE9006_TYPE_1_VS_TYPE_2_DIABETES_PBMC_AT_DX_UP_PLIER_integrated	chr10_95253548_C_G	chr10_95253548_C_G	X27.GSE9006_TYPE_1_VS_TYPE_2_DIABETES_PBMC_AT_DX_UP_PLIER_integrated_CL_0002057_LPS_2h_chr10_95253548_C_G_cs_1	1742	0.190630705160455	-5.7584143028312	1	X27.GSE9006_TYPE_1_VS_TYPE_2_DIABETES_PBMC_AT_DX_UP	PLIER	integrated	CL_0002057_LPS_2h	chr10	2.82649942194336e-08	0.0953387615629636	1	5.68181818181818e-10	58	265	678	FALSE	FALSE	1.04033974884969e-28	2.08067949769938e-28	95253548	rs34883883
chr10_95253548_C_G	F20_PEER_integrated	chr10_95253548_C_G	chr10_95260180_G_T	F20_PEER_integrated_CL_0002057_LPS_24h_chr10_95260180_G_T_cs_1	1721	0.07936183979453	5.60224878118165	1	F20	PEER	integrated	CL_0002057_LPS_24h	chr10	2.85254588050849e-08	0.758452466439159	1	1.02040816326531e-09	48	574	1131	FALSE	FALSE	0.018980720760344	0.0379614415206881	95253548	rs34883883
chr10_95253548_C_G	F20_PEER_integrated	chr10_95258399_G_A	chr10_95260180_G_T	F20_PEER_integrated_CL_0002057_LPS_24h_chr10_95260180_G_T_cs_1	1734	0.0741740891596306	5.58335743583898	1	F20	PEER	integrated	CL_0002057_LPS_24h	chr10	2.85254588050849e-08	0.758452466439159	1	1.02040816326531e-09	48	574	1131	FALSE	FALSE	0.018980720760344	0.0379614415206881	95258399	rs67403627
chr10_95253548_C_G	X27.GSE9006_TYPE_1_VS_TYPE_2_DIABETES_PBMC_AT_DX_UP_PLIER_integrated	chr10_95258399_G_A	chr10_95253548_C_G	X27.GSE9006_TYPE_1_VS_TYPE_2_DIABETES_PBMC_AT_DX_UP_PLIER_integrated_CL_0002057_LPS_2h_chr10_95253548_C_G_cs_1	1755	0.0526703787780188	-5.44653624927066	1	X27.GSE9006_TYPE_1_VS_TYPE_2_DIABETES_PBMC_AT_DX_UP	PLIER	integrated	CL_0002057_LPS_2h	chr10	2.82649942194336e-08	0.0953387615629636	1	5.68181818181818e-10	58	265	678	FALSE	FALSE	1.04033974884969e-28	2.08067949769938e-28	95258399	rs67403627
chr10_95253548_C_G	F20_PEER_integrated	chr10_95259964_G_C	chr10_95260180_G_T	F20_PEER_integrated_CL_0002057_LPS_24h_chr10_95260180_G_T_cs_1	1738	0.0741740891596306	5.58335743583898	1	F20	PEER	integrated	CL_0002057_LPS_24h	chr10	2.85254588050849e-08	0.758452466439159	1	1.02040816326531e-09	48	574	1131	FALSE	FALSE	0.018980720760344	0.0379614415206881	95259964	rs45457395
chr10_95253548_C_G	X27.GSE9006_TYPE_1_VS_TYPE_2_DIABETES_PBMC_AT_DX_UP_PLIER_integrated	chr10_95259964_G_C	chr10_95253548_C_G	X27.GSE9006_TYPE_1_VS_TYPE_2_DIABETES_PBMC_AT_DX_UP_PLIER_integrated_CL_0002057_LPS_2h_chr10_95253548_C_G_cs_1	1759	0.0526703787780188	-5.44653624927066	1	X27.GSE9006_TYPE_1_VS_TYPE_2_DIABETES_PBMC_AT_DX_UP	PLIER	integrated	CL_0002057_LPS_2h	chr10	2.82649942194336e-08	0.0953387615629636	1	5.68181818181818e-10	58	265	678	FALSE	FALSE	1.04033974884969e-28	2.08067949769938e-28	95259964	rs45457395
chr10_95253548_C_G	X27.GSE9006_TYPE_1_VS_TYPE_2_DIABETES_PBMC_AT_DX_UP_PLIER_integrated	chr10_95260180_G_T	chr10_95253548_C_G	X27.GSE9006_TYPE_1_VS_TYPE_2_DIABETES_PBMC_AT_DX_UP_PLIER_integrated_CL_0002057_LPS_2h_chr10_95253548_C_G_cs_1	1761	0.0649857516365806	-5.47034685680673	1	X27.GSE9006_TYPE_1_VS_TYPE_2_DIABETES_PBMC_AT_DX_UP	PLIER	integrated	CL_0002057_LPS_2h	chr10	2.82649942194336e-08	0.0953387615629636	1	5.68181818181818e-10	58	265	678	FALSE	FALSE	1.04033974884969e-28	2.08067949769938e-28	95260180	rs35432490
chr10_95253548_C_G	F20_PEER_integrated	chr10_95260180_G_T	chr10_95260180_G_T	F20_PEER_integrated_CL_0002057_LPS_24h_chr10_95260180_G_T_cs_1	1740	0.107674096688749	5.65685514866752	1	F20	PEER	integrated	CL_0002057_LPS_24h	chr10	2.85254588050849e-08	0.758452466439159	1	1.02040816326531e-09	48	574	1131	FALSE	FALSE	0.018980720760344	0.0379614415206881	95260180	rs35432490
chr10_95253548_C_G	F20_PEER_integrated	chr10_95265984_A_G	chr10_95260180_G_T	F20_PEER_integrated_CL_0002057_LPS_24h_chr10_95260180_G_T_cs_1	1776	0.0741740891596306	5.58335743583898	1	F20	PEER	integrated	CL_0002057_LPS_24h	chr10	2.85254588050849e-08	0.758452466439159	1	1.02040816326531e-09	48	574	1131	FALSE	FALSE	0.018980720760344	0.0379614415206881	95265984
chr10_95253548_C_G	X27.GSE9006_TYPE_1_VS_TYPE_2_DIABETES_PBMC_AT_DX_UP_PLIER_integrated	chr10_95265984_A_G	chr10_95253548_C_G	X27.GSE9006_TYPE_1_VS_TYPE_2_DIABETES_PBMC_AT_DX_UP_PLIER_integrated_CL_0002057_LPS_2h_chr10_95253548_C_G_cs_1	1797	0.0526703787780188	-5.44653624927066	1	X27.GSE9006_TYPE_1_VS_TYPE_2_DIABETES_PBMC_AT_DX_UP	PLIER	integrated	CL_0002057_LPS_2h	chr10	2.82649942194336e-08	0.0953387615629636	1	5.68181818181818e-10	58	265	678	FALSE	FALSE	1.04033974884969e-28	2.08067949769938e-28	95265984
chr10_95253548_C_G	X27.GSE9006_TYPE_1_VS_TYPE_2_DIABETES_PBMC_AT_DX_UP_PLIER_integrated	chr10_95265989_A_G	chr10_95253548_C_G	X27.GSE9006_TYPE_1_VS_TYPE_2_DIABETES_PBMC_AT_DX_UP_PLIER_integrated_CL_0002057_LPS_2h_chr10_95253548_C_G_cs_1	1799	0.0526703787780188	-5.44653624927066	1	X27.GSE9006_TYPE_1_VS_TYPE_2_DIABETES_PBMC_AT_DX_UP	PLIER	integrated	CL_0002057_LPS_2h	chr10	2.82649942194336e-08	0.0953387615629636	1	5.68181818181818e-10	58	265	678	FALSE	FALSE	1.04033974884969e-28	2.08067949769938e-28	95265989	rs34729632
chr10_95253548_C_G	F20_PEER_integrated	chr10_95265989_A_G	chr10_95260180_G_T	F20_PEER_integrated_CL_0002057_LPS_24h_chr10_95260180_G_T_cs_1	1778	0.0741740891596306	5.58335743583898	1	F20	PEER	integrated	CL_0002057_LPS_24h	chr10	2.85254588050849e-08	0.758452466439159	1	1.02040816326531e-09	48	574	1131	FALSE	FALSE	0.018980720760344	0.0379614415206881	95265989	rs34729632
chr10_95253548_C_G	F20_PEER_integrated	chr10_95269560_A_G	chr10_95260180_G_T	F20_PEER_integrated_CL_0002057_LPS_24h_chr10_95260180_G_T_cs_1	1787	0.0231617333456138	5.17754828978522	1	F20	PEER	integrated	CL_0002057_LPS_24h	chr10	2.85254588050849e-08	0.758452466439159	1	1.02040816326531e-09	48	574	1131	FALSE	FALSE	0.018980720760344	0.0379614415206881	95269560	rs34031095
chr10_95253548_C_G	X27.GSE9006_TYPE_1_VS_TYPE_2_DIABETES_PBMC_AT_DX_UP_PLIER_integrated	chr10_95269560_A_G	chr10_95253548_C_G	X27.GSE9006_TYPE_1_VS_TYPE_2_DIABETES_PBMC_AT_DX_UP_PLIER_integrated_CL_0002057_LPS_2h_chr10_95253548_C_G_cs_1	1808	0.0121559103223409	-5.13406539917624	1	X27.GSE9006_TYPE_1_VS_TYPE_2_DIABETES_PBMC_AT_DX_UP	PLIER	integrated	CL_0002057_LPS_2h	chr10	2.82649942194336e-08	0.0953387615629636	1	5.68181818181818e-10	58	265	678	FALSE	FALSE	1.04033974884969e-28	2.08067949769938e-28	95269560	rs34031095
chr10_95253548_C_G	X27.GSE9006_TYPE_1_VS_TYPE_2_DIABETES_PBMC_AT_DX_UP_PLIER_integrated	chr10_95271959_A_C	chr10_95253548_C_G	X27.GSE9006_TYPE_1_VS_TYPE_2_DIABETES_PBMC_AT_DX_UP_PLIER_integrated_CL_0002057_LPS_2h_chr10_95253548_C_G_cs_1	1815	0.0316592710559618	-5.33465440755874	1	X27.GSE9006_TYPE_1_VS_TYPE_2_DIABETES_PBMC_AT_DX_UP	PLIER	integrated	CL_0002057_LPS_2h	chr10	2.82649942194336e-08	0.0953387615629636	1	5.68181818181818e-10	58	265	678	FALSE	FALSE	1.04033974884969e-28	2.08067949769938e-28	95271959
chr10_95253548_C_G	F20_PEER_integrated	chr10_95271959_A_C	chr10_95260180_G_T	F20_PEER_integrated_CL_0002057_LPS_24h_chr10_95260180_G_T_cs_1	1794	0.0938980038309799	5.6318419682475	1	F20	PEER	integrated	CL_0002057_LPS_24h	chr10	2.85254588050849e-08	0.758452466439159	1	1.02040816326531e-09	48	574	1131	FALSE	FALSE	0.018980720760344	0.0379614415206881	95271959
chr10_95253548_C_G	F20_PEER_integrated	chr10_95272695_TA_T	chr10_95260180_G_T	F20_PEER_integrated_CL_0002057_LPS_24h_chr10_95260180_G_T_cs_1	1795	0.0236664906412404	5.336886170572	1	F20	PEER	integrated	CL_0002057_LPS_24h	chr10	2.85254588050849e-08	0.758452466439159	1	1.02040816326531e-09	48	574	1131	FALSE	FALSE	0.018980720760344	0.0379614415206881	95272695	rs35563831; rs397719730
chr10_95253548_C_G	X27.GSE9006_TYPE_1_VS_TYPE_2_DIABETES_PBMC_AT_DX_UP_PLIER_integrated	chr10_95272695_TA_T	chr10_95253548_C_G	X27.GSE9006_TYPE_1_VS_TYPE_2_DIABETES_PBMC_AT_DX_UP_PLIER_integrated_CL_0002057_LPS_2h_chr10_95253548_C_G_cs_1	1816	0.009198174236562	-4.98526630284958	1	X27.GSE9006_TYPE_1_VS_TYPE_2_DIABETES_PBMC_AT_DX_UP	PLIER	integrated	CL_0002057_LPS_2h	chr10	2.82649942194336e-08	0.0953387615629636	1	5.68181818181818e-10	58	265	678	FALSE	FALSE	1.04033974884969e-28	2.08067949769938e-28	95272695	rs35563831; rs397719730
chr10_95253548_C_G	F20_PEER_integrated	chr10_95275891_G_GT	chr10_95260180_G_T	F20_PEER_integrated_CL_0002057_LPS_24h_chr10_95260180_G_T_cs_1	1805	0.0232358618813109	5.16745737107847	1	F20	PEER	integrated	CL_0002057_LPS_24h	chr10	2.85254588050849e-08	0.758452466439159	1	1.02040816326531e-09	48	574	1131	FALSE	FALSE	0.018980720760344	0.0379614415206881	95275891	rs35419023
chr10_95253548_C_G	X27.GSE9006_TYPE_1_VS_TYPE_2_DIABETES_PBMC_AT_DX_UP_PLIER_integrated	chr10_95275891_G_GT	chr10_95253548_C_G	X27.GSE9006_TYPE_1_VS_TYPE_2_DIABETES_PBMC_AT_DX_UP_PLIER_integrated_CL_0002057_LPS_2h_chr10_95253548_C_G_cs_1	1826	0.0137185906304275	-5.14643158096249	1	X27.GSE9006_TYPE_1_VS_TYPE_2_DIABETES_PBMC_AT_DX_UP	PLIER	integrated	CL_0002057_LPS_2h	chr10	2.82649942194336e-08	0.0953387615629636	1	5.68181818181818e-10	58	265	678	FALSE	FALSE	1.04033974884969e-28	2.08067949769938e-28	95275891	rs35419023
chr11_117272469_G_C	Cluster_5880_funcExplorer_integrated	chr11_117237059_A_G	chr11_117272469_G_C	Cluster_5880_funcExplorer_integrated_CL_0000236_naive_chr11_117272469_G_C_cs_1	1139	0.0087953853017998	4.73572282028411	1	Cluster_5880	funcExplorer	integrated	CL_0000236_naive	chr11	3.06330370154095e-08	0.00341104554681897	0.0721330435987849	4e-10	3	422	5	FALSE	FALSE	0.000116063313383157	0.000116063313383157	117237059
chr11_117272469_G_C	Cluster_5880_funcExplorer_integrated	chr11_117238554_G_T	chr11_117272469_G_C	Cluster_5880_funcExplorer_integrated_CL_0000236_naive_chr11_117272469_G_C_cs_1	1143	0.0087953853017998	4.73572282028411	1	Cluster_5880	funcExplorer	integrated	CL_0000236_naive	chr11	3.06330370154095e-08	0.00341104554681897	0.0721330435987849	4e-10	3	422	5	FALSE	FALSE	0.000116063313383157	0.000116063313383157	117238554
chr11_117272469_G_C	Cluster_5880_funcExplorer_integrated	chr11_117255994_A_G	chr11_117272469_G_C	Cluster_5880_funcExplorer_integrated_CL_0000236_naive_chr11_117272469_G_C_cs_1	1179	0.00735661037931812	4.67520970398501	1	Cluster_5880	funcExplorer	integrated	CL_0000236_naive	chr11	3.06330370154095e-08	0.00341104554681897	0.0721330435987849	4e-10	3	422	5	FALSE	FALSE	0.000116063313383157	0.000116063313383157	117255994
chr11_117272469_G_C	Cluster_5880_funcExplorer_integrated	chr11_117256904_C_T	chr11_117272469_G_C	Cluster_5880_funcExplorer_integrated_CL_0000236_naive_chr11_117272469_G_C_cs_1	1181	0.00735661037931812	4.67520970398501	1	Cluster_5880	funcExplorer	integrated	CL_0000236_naive	chr11	3.06330370154095e-08	0.00341104554681897	0.0721330435987849	4e-10	3	422	5	FALSE	FALSE	0.000116063313383157	0.000116063313383157	117256904
chr11_117272469_G_C	Cluster_5880_funcExplorer_integrated	chr11_117258255_A_G	chr11_117272469_G_C	Cluster_5880_funcExplorer_integrated_CL_0000236_naive_chr11_117272469_G_C_cs_1	1183	0.00735661037931812	4.67520970398501	1	Cluster_5880	funcExplorer	integrated	CL_0000236_naive	chr11	3.06330370154095e-08	0.00341104554681897	0.0721330435987849	4e-10	3	422	5	FALSE	FALSE	0.000116063313383157	0.000116063313383157	117258255	rs621858
chr11_117272469_G_C	Cluster_5880_funcExplorer_integrated	chr11_117261003_A_G	chr11_117272469_G_C	Cluster_5880_funcExplorer_integrated_CL_0000236_naive_chr11_117272469_G_C_cs_1	1190	0.00735661037931812	4.67520970398501	1	Cluster_5880	funcExplorer	integrated	CL_0000236_naive	chr11	3.06330370154095e-08	0.00341104554681897	0.0721330435987849	4e-10	3	422	5	FALSE	FALSE	0.000116063313383157	0.000116063313383157	117261003
chr11_117272469_G_C	Cluster_5880_funcExplorer_integrated	chr11_117262092_A_G	chr11_117272469_G_C	Cluster_5880_funcExplorer_integrated_CL_0000236_naive_chr11_117272469_G_C_cs_1	1192	0.00735661037931812	4.67520970398501	1	Cluster_5880	funcExplorer	integrated	CL_0000236_naive	chr11	3.06330370154095e-08	0.00341104554681897	0.0721330435987849	4e-10	3	422	5	FALSE	FALSE	0.000116063313383157	0.000116063313383157	117262092
chr11_117272469_G_C	Cluster_5880_funcExplorer_integrated	chr11_117262093_C_A	chr11_117272469_G_C	Cluster_5880_funcExplorer_integrated_CL_0000236_naive_chr11_117272469_G_C_cs_1	1193	0.00735661037931812	4.67520970398501	1	Cluster_5880	funcExplorer	integrated	CL_0000236_naive	chr11	3.06330370154095e-08	0.00341104554681897	0.0721330435987849	4e-10	3	422	5	FALSE	FALSE	0.000116063313383157	0.000116063313383157	117262093
chr11_117272469_G_C	Cluster_5880_funcExplorer_integrated	chr11_117262309_A_G	chr11_117272469_G_C	Cluster_5880_funcExplorer_integrated_CL_0000236_naive_chr11_117272469_G_C_cs_1	1194	0.00735661037931812	4.67520970398501	1	Cluster_5880	funcExplorer	integrated	CL_0000236_naive	chr11	3.06330370154095e-08	0.00341104554681897	0.0721330435987849	4e-10	3	422	5	FALSE	FALSE	0.000116063313383157	0.000116063313383157	117262309	rs637065
chr11_117272469_G_C	Cluster_5880_funcExplorer_integrated	chr11_117262956_A_G	chr11_117272469_G_C	Cluster_5880_funcExplorer_integrated_CL_0000236_naive_chr11_117272469_G_C_cs_1	1200	0.00735661037931812	4.67520970398501	1	Cluster_5880	funcExplorer	integrated	CL_0000236_naive	chr11	3.06330370154095e-08	0.00341104554681897	0.0721330435987849	4e-10	3	422	5	FALSE	FALSE	0.000116063313383157	0.000116063313383157	117262956	rs552176
chr11_117272469_G_C	Cluster_5880_funcExplorer_integrated	chr11_117264045_G_A	chr11_117272469_G_C	Cluster_5880_funcExplorer_integrated_CL_0000236_naive_chr11_117272469_G_C_cs_1	1203	0.00735661037931812	4.67520970398501	1	Cluster_5880	funcExplorer	integrated	CL_0000236_naive	chr11	3.06330370154095e-08	0.00341104554681897	0.0721330435987849	4e-10	3	422	5	FALSE	FALSE	0.000116063313383157	0.000116063313383157	117264045	rs540922
chr11_117272469_G_C	Cluster_5880_funcExplorer_integrated	chr11_117265090_T_C	chr11_117272469_G_C	Cluster_5880_funcExplorer_integrated_CL_0000236_naive_chr11_117272469_G_C_cs_1	1207	0.0115679084128176	4.80663539371117	1	Cluster_5880	funcExplorer	integrated	CL_0000236_naive	chr11	3.06330370154095e-08	0.00341104554681897	0.0721330435987849	4e-10	3	422	5	FALSE	FALSE	0.000116063313383157	0.000116063313383157	117265090
chr11_117272469_G_C	Cluster_5880_funcExplorer_integrated	chr11_117265354_T_C	chr11_117272469_G_C	Cluster_5880_funcExplorer_integrated_CL_0000236_naive_chr11_117272469_G_C_cs_1	1208	0.0115679084128176	4.80663539371117	1	Cluster_5880	funcExplorer	integrated	CL_0000236_naive	chr11	3.06330370154095e-08	0.00341104554681897	0.0721330435987849	4e-10	3	422	5	FALSE	FALSE	0.000116063313383157	0.000116063313383157	117265354
chr11_117272469_G_C	Cluster_5880_funcExplorer_integrated	chr11_117265662_G_C	chr11_117272469_G_C	Cluster_5880_funcExplorer_integrated_CL_0000236_naive_chr11_117272469_G_C_cs_1	1210	0.0115679084128176	4.80663539371117	1	Cluster_5880	funcExplorer	integrated	CL_0000236_naive	chr11	3.06330370154095e-08	0.00341104554681897	0.0721330435987849	4e-10	3	422	5	FALSE	FALSE	0.000116063313383157	0.000116063313383157	117265662
chr11_117272469_G_C	Cluster_5880_funcExplorer_integrated	chr11_117266539_G_T	chr11_117272469_G_C	Cluster_5880_funcExplorer_integrated_CL_0000236_naive_chr11_117272469_G_C_cs_1	1211	0.0115679084128176	4.80663539371117	1	Cluster_5880	funcExplorer	integrated	CL_0000236_naive	chr11	3.06330370154095e-08	0.00341104554681897	0.0721330435987849	4e-10	3	422	5	FALSE	FALSE	0.000116063313383157	0.000116063313383157	117266539	rs507880
chr11_117272469_G_C	Cluster_5880_funcExplorer_integrated	chr11_117266917_C_T	chr11_117272469_G_C	Cluster_5880_funcExplorer_integrated_CL_0000236_naive_chr11_117272469_G_C_cs_1	1213	0.0115679084128176	4.80663539371117	1	Cluster_5880	funcExplorer	integrated	CL_0000236_naive	chr11	3.06330370154095e-08	0.00341104554681897	0.0721330435987849	4e-10	3	422	5	FALSE	FALSE	0.000116063313383157	0.000116063313383157	117266917	rs2509211
chr11_117272469_G_C	Cluster_5880_funcExplorer_integrated	chr11_117266931_G_A	chr11_117272469_G_C	Cluster_5880_funcExplorer_integrated_CL_0000236_naive_chr11_117272469_G_C_cs_1	1214	0.0115679084128176	4.80663539371117	1	Cluster_5880	funcExplorer	integrated	CL_0000236_naive	chr11	3.06330370154095e-08	0.00341104554681897	0.0721330435987849	4e-10	3	422	5	FALSE	FALSE	0.000116063313383157	0.000116063313383157	117266931
chr11_117272469_G_C	Cluster_5880_funcExplorer_integrated	chr11_117267575_G_T	chr11_117272469_G_C	Cluster_5880_funcExplorer_integrated_CL_0000236_naive_chr11_117272469_G_C_cs_1	1215	0.0115679084128176	4.80663539371117	1	Cluster_5880	funcExplorer	integrated	CL_0000236_naive	chr11	3.06330370154095e-08	0.00341104554681897	0.0721330435987849	4e-10	3	422	5	FALSE	FALSE	0.000116063313383157	0.000116063313383157	117267575
chr11_117272469_G_C	Cluster_5880_funcExplorer_integrated	chr11_117268120_T_A	chr11_117272469_G_C	Cluster_5880_funcExplorer_integrated_CL_0000236_naive_chr11_117272469_G_C_cs_1	1217	0.0115679084128176	4.80663539371117	1	Cluster_5880	funcExplorer	integrated	CL_0000236_naive	chr11	3.06330370154095e-08	0.00341104554681897	0.0721330435987849	4e-10	3	422	5	FALSE	FALSE	0.000116063313383157	0.000116063313383157	117268120	rs619772
chr11_117272469_G_C	Cluster_5880_funcExplorer_integrated	chr11_117268405_G_A	chr11_117272469_G_C	Cluster_5880_funcExplorer_integrated_CL_0000236_naive_chr11_117272469_G_C_cs_1	1218	0.0422657688113035	5.12422257734349	1	Cluster_5880	funcExplorer	integrated	CL_0000236_naive	chr11	3.06330370154095e-08	0.00341104554681897	0.0721330435987849	4e-10	3	422	5	FALSE	FALSE	0.000116063313383157	0.000116063313383157	117268405	rs558590
chr11_117272469_G_C	Cluster_5880_funcExplorer_integrated	chr11_117272469_G_C	chr11_117272469_G_C	Cluster_5880_funcExplorer_integrated_CL_0000236_naive_chr11_117272469_G_C_cs_1	1221	0.267110482547043	5.59476145836048	1	Cluster_5880	funcExplorer	integrated	CL_0000236_naive	chr11	3.06330370154095e-08	0.00341104554681897	0.0721330435987849	4e-10	3	422	5	FALSE	FALSE	0.000116063313383157	0.000116063313383157	117272469
chr11_117272469_G_C	Cluster_5880_funcExplorer_integrated	chr11_117272865_T_C	chr11_117272469_G_C	Cluster_5880_funcExplorer_integrated_CL_0000236_naive_chr11_117272469_G_C_cs_1	1224	0.0422657688113039	5.12422257734349	1	Cluster_5880	funcExplorer	integrated	CL_0000236_naive	chr11	3.06330370154095e-08	0.00341104554681897	0.0721330435987849	4e-10	3	422	5	FALSE	FALSE	0.000116063313383157	0.000116063313383157	117272865
chr11_117272469_G_C	Cluster_5880_funcExplorer_integrated	chr11_117272889_G_A	chr11_117272469_G_C	Cluster_5880_funcExplorer_integrated_CL_0000236_naive_chr11_117272469_G_C_cs_1	1225	0.0422657688113039	5.12422257734349	1	Cluster_5880	funcExplorer	integrated	CL_0000236_naive	chr11	3.06330370154095e-08	0.00341104554681897	0.0721330435987849	4e-10	3	422	5	FALSE	FALSE	0.000116063313383157	0.000116063313383157	117272889	rs573956
chr11_117272469_G_C	Cluster_5880_funcExplorer_integrated	chr11_117273478_T_TA	chr11_117272469_G_C	Cluster_5880_funcExplorer_integrated_CL_0000236_naive_chr11_117272469_G_C_cs_1	1227	0.0422657688113035	5.12422257734349	1	Cluster_5880	funcExplorer	integrated	CL_0000236_naive	chr11	3.06330370154095e-08	0.00341104554681897	0.0721330435987849	4e-10	3	422	5	FALSE	FALSE	0.000116063313383157	0.000116063313383157	117273478	rs35378775
chr11_117272469_G_C	Cluster_5880_funcExplorer_integrated	chr11_117274011_A_C	chr11_117272469_G_C	Cluster_5880_funcExplorer_integrated_CL_0000236_naive_chr11_117272469_G_C_cs_1	1229	0.0422657688113035	5.12422257734349	1	Cluster_5880	funcExplorer	integrated	CL_0000236_naive	chr11	3.06330370154095e-08	0.00341104554681897	0.0721330435987849	4e-10	3	422	5	FALSE	FALSE	0.000116063313383157	0.000116063313383157	117274011	rs495438
chr11_117272469_G_C	Cluster_5880_funcExplorer_integrated	chr11_117275099_G_A	chr11_117272469_G_C	Cluster_5880_funcExplorer_integrated_CL_0000236_naive_chr11_117272469_G_C_cs_1	1234	0.0422657688113035	5.12422257734349	1	Cluster_5880	funcExplorer	integrated	CL_0000236_naive	chr11	3.06330370154095e-08	0.00341104554681897	0.0721330435987849	4e-10	3	422	5	FALSE	FALSE	0.000116063313383157	0.000116063313383157	117275099	rs492151
chr11_117272469_G_C	Cluster_5880_funcExplorer_integrated	chr11_117275202_T_A	chr11_117272469_G_C	Cluster_5880_funcExplorer_integrated_CL_0000236_naive_chr11_117272469_G_C_cs_1	1235	0.0422657688113035	5.12422257734349	1	Cluster_5880	funcExplorer	integrated	CL_0000236_naive	chr11	3.06330370154095e-08	0.00341104554681897	0.0721330435987849	4e-10	3	422	5	FALSE	FALSE	0.000116063313383157	0.000116063313383157	117275202	rs644215
chr11_117272469_G_C	Cluster_5880_funcExplorer_integrated	chr11_117275233_T_C	chr11_117272469_G_C	Cluster_5880_funcExplorer_integrated_CL_0000236_naive_chr11_117272469_G_C_cs_1	1236	0.0422657688113035	5.12422257734349	1	Cluster_5880	funcExplorer	integrated	CL_0000236_naive	chr11	3.06330370154095e-08	0.00341104554681897	0.0721330435987849	4e-10	3	422	5	FALSE	FALSE	0.000116063313383157	0.000116063313383157	117275233	rs493139
chr11_117272469_G_C	Cluster_5880_funcExplorer_integrated	chr11_117277271_G_A	chr11_117272469_G_C	Cluster_5880_funcExplorer_integrated_CL_0000236_naive_chr11_117272469_G_C_cs_1	1237	0.0422657688113035	5.12422257734349	1	Cluster_5880	funcExplorer	integrated	CL_0000236_naive	chr11	3.06330370154095e-08	0.00341104554681897	0.0721330435987849	4e-10	3	422	5	FALSE	FALSE	0.000116063313383157	0.000116063313383157	117277271	rs7925044
chr11_117272469_G_C	Cluster_5880_funcExplorer_integrated	chr11_117281824_G_T	chr11_117272469_G_C	Cluster_5880_funcExplorer_integrated_CL_0000236_naive_chr11_117272469_G_C_cs_1	1245	0.0422657688113035	5.12422257734349	1	Cluster_5880	funcExplorer	integrated	CL_0000236_naive	chr11	3.06330370154095e-08	0.00341104554681897	0.0721330435987849	4e-10	3	422	5	FALSE	FALSE	0.000116063313383157	0.000116063313383157	117281824	rs505045
chr11_117272469_G_C	Cluster_5880_funcExplorer_integrated	chr11_117285836_T_C	chr11_117272469_G_C	Cluster_5880_funcExplorer_integrated_CL_0000236_naive_chr11_117272469_G_C_cs_1	1249	0.0422657688113035	5.12422257734349	1	Cluster_5880	funcExplorer	integrated	CL_0000236_naive	chr11	3.06330370154095e-08	0.00341104554681897	0.0721330435987849	4e-10	3	422	5	FALSE	FALSE	0.000116063313383157	0.000116063313383157	117285836	rs7083
chr11_117272469_G_C	Cluster_5880_funcExplorer_integrated	chr11_117293049_C_A	chr11_117272469_G_C	Cluster_5880_funcExplorer_integrated_CL_0000236_naive_chr11_117272469_G_C_cs_1	1258	0.0574454090415516	5.22735545530605	1	Cluster_5880	funcExplorer	integrated	CL_0000236_naive	chr11	3.06330370154095e-08	0.00341104554681897	0.0721330435987849	4e-10	3	422	5	FALSE	FALSE	0.000116063313383157	0.000116063313383157	117293049
chr11_117272469_G_C	Cluster_5880_funcExplorer_integrated	chr11_117300621_T_C	chr11_117272469_G_C	Cluster_5880_funcExplorer_integrated_CL_0000236_naive_chr11_117272469_G_C_cs_1	1266	0.00932494969549147	4.86681912585688	1	Cluster_5880	funcExplorer	integrated	CL_0000236_naive	chr11	3.06330370154095e-08	0.00341104554681897	0.0721330435987849	4e-10	3	422	5	FALSE	FALSE	0.000116063313383157	0.000116063313383157	117300621
chr11_117272469_G_C	Cluster_5880_funcExplorer_integrated	chr11_117302104_T_C	chr11_117272469_G_C	Cluster_5880_funcExplorer_integrated_CL_0000236_naive_chr11_117272469_G_C_cs_1	1268	0.0296033717665145	5.19507872786383	1	Cluster_5880	funcExplorer	integrated	CL_0000236_naive	chr11	3.06330370154095e-08	0.00341104554681897	0.0721330435987849	4e-10	3	422	5	FALSE	FALSE	0.000116063313383157	0.000116063313383157	117302104
chr11_117272469_G_C	Cluster_5880_funcExplorer_integrated	chr11_117302303_C_A	chr11_117272469_G_C	Cluster_5880_funcExplorer_integrated_CL_0000236_naive_chr11_117272469_G_C_cs_1	1269	0.0296033717665145	5.19507872786383	1	Cluster_5880	funcExplorer	integrated	CL_0000236_naive	chr11	3.06330370154095e-08	0.00341104554681897	0.0721330435987849	4e-10	3	422	5	FALSE	FALSE	0.000116063313383157	0.000116063313383157	117302303
chr11_120421455_T_G	IC61_ICA_integrated	chr11_120325724_C_G	chr11_120421455_T_G	IC61_ICA_integrated_CL_0002057_LPS_2h_chr11_120421455_T_G_cs_1	1225	0.0049520566901381	4.46606641487785	1	IC61	ICA	integrated	CL_0002057_LPS_2h	chr11	1.59193699033464e-08	0.0610790362716039	1	2.94117647058824e-10	6	245	1004	FALSE	FALSE	0.993132312961723	0.993132312961723	120325724	rs36011588
chr11_120421455_T_G	IC61_ICA_integrated	chr11_120327384_G_A	chr11_120421455_T_G	IC61_ICA_integrated_CL_0002057_LPS_2h_chr11_120421455_T_G_cs_1	1229	0.0049520566901381	4.46606641487785	1	IC61	ICA	integrated	CL_0002057_LPS_2h	chr11	1.59193699033464e-08	0.0610790362716039	1	2.94117647058824e-10	6	245	1004	FALSE	FALSE	0.993132312961723	0.993132312961723	120327384	rs1893261
chr11_120421455_T_G	IC61_ICA_integrated	chr11_120328371_G_A	chr11_120421455_T_G	IC61_ICA_integrated_CL_0002057_LPS_2h_chr11_120421455_T_G_cs_1	1232	0.00524793842154569	4.50513077050782	1	IC61	ICA	integrated	CL_0002057_LPS_2h	chr11	1.59193699033464e-08	0.0610790362716039	1	2.94117647058824e-10	6	245	1004	FALSE	FALSE	0.993132312961723	0.993132312961723	120328371	rs11823300
chr11_120421455_T_G	IC61_ICA_integrated	chr11_120329215_T_C	chr11_120421455_T_G	IC61_ICA_integrated_CL_0002057_LPS_2h_chr11_120421455_T_G_cs_1	1242	0.0049520566901381	4.46606641487785	1	IC61	ICA	integrated	CL_0002057_LPS_2h	chr11	1.59193699033464e-08	0.0610790362716039	1	2.94117647058824e-10	6	245	1004	FALSE	FALSE	0.993132312961723	0.993132312961723	120329215
chr11_120421455_T_G	IC61_ICA_integrated	chr11_120331390_T_C	chr11_120421455_T_G	IC61_ICA_integrated_CL_0002057_LPS_2h_chr11_120421455_T_G_cs_1	1244	0.0049520566901381	4.46606641487785	1	IC61	ICA	integrated	CL_0002057_LPS_2h	chr11	1.59193699033464e-08	0.0610790362716039	1	2.94117647058824e-10	6	245	1004	FALSE	FALSE	0.993132312961723	0.993132312961723	120331390	rs11217821
chr11_120421455_T_G	IC61_ICA_integrated	chr11_120332850_A_G	chr11_120421455_T_G	IC61_ICA_integrated_CL_0002057_LPS_2h_chr11_120421455_T_G_cs_1	1245	0.0049520566901381	4.46606641487785	1	IC61	ICA	integrated	CL_0002057_LPS_2h	chr11	1.59193699033464e-08	0.0610790362716039	1	2.94117647058824e-10	6	245	1004	FALSE	FALSE	0.993132312961723	0.993132312961723	120332850	rs34298380
chr11_120421455_T_G	IC61_ICA_integrated	chr11_120332919_G_A	chr11_120421455_T_G	IC61_ICA_integrated_CL_0002057_LPS_2h_chr11_120421455_T_G_cs_1	1246	0.0049520566901381	4.46606641487785	1	IC61	ICA	integrated	CL_0002057_LPS_2h	chr11	1.59193699033464e-08	0.0610790362716039	1	2.94117647058824e-10	6	245	1004	FALSE	FALSE	0.993132312961723	0.993132312961723	120332919	rs12806740
chr11_120421455_T_G	IC61_ICA_integrated	chr11_120334292_G_GT	chr11_120421455_T_G	IC61_ICA_integrated_CL_0002057_LPS_2h_chr11_120421455_T_G_cs_1	1248	0.0175244463813103	4.90115759266402	1	IC61	ICA	integrated	CL_0002057_LPS_2h	chr11	1.59193699033464e-08	0.0610790362716039	1	2.94117647058824e-10	6	245	1004	FALSE	FALSE	0.993132312961723	0.993132312961723	120334292
chr11_120421455_T_G	IC61_ICA_integrated	chr11_120334761_GTA_GTATA	chr11_120421455_T_G	IC61_ICA_integrated_CL_0002057_LPS_2h_chr11_120421455_T_G_cs_1	1249	0.0049520566901381	4.46606641487785	1	IC61	ICA	integrated	CL_0002057_LPS_2h	chr11	1.59193699033464e-08	0.0610790362716039	1	2.94117647058824e-10	6	245	1004	FALSE	FALSE	0.993132312961723	0.993132312961723	120334761
chr11_120421455_T_G	IC61_ICA_integrated	chr11_120335926_AG_A	chr11_120421455_T_G	IC61_ICA_integrated_CL_0002057_LPS_2h_chr11_120421455_T_G_cs_1	1254	0.00524793842154569	4.50513077050782	1	IC61	ICA	integrated	CL_0002057_LPS_2h	chr11	1.59193699033464e-08	0.0610790362716039	1	2.94117647058824e-10	6	245	1004	FALSE	FALSE	0.993132312961723	0.993132312961723	120335926	rs3840762
chr11_120421455_T_G	IC61_ICA_integrated	chr11_120336696_A_G	chr11_120421455_T_G	IC61_ICA_integrated_CL_0002057_LPS_2h_chr11_120421455_T_G_cs_1	1255	0.0049520566901381	4.46606641487785	1	IC61	ICA	integrated	CL_0002057_LPS_2h	chr11	1.59193699033464e-08	0.0610790362716039	1	2.94117647058824e-10	6	245	1004	FALSE	FALSE	0.993132312961723	0.993132312961723	120336696	rs7126413
chr11_120421455_T_G	IC61_ICA_integrated	chr11_120373483_A_G	chr11_120421455_T_G	IC61_ICA_integrated_CL_0002057_LPS_2h_chr11_120421455_T_G_cs_1	1319	0.0042633083712913	4.40082414015424	1	IC61	ICA	integrated	CL_0002057_LPS_2h	chr11	1.59193699033464e-08	0.0610790362716039	1	2.94117647058824e-10	6	245	1004	FALSE	FALSE	0.993132312961723	0.993132312961723	120373483	rs10892567
chr11_120421455_T_G	IC61_ICA_integrated	chr11_120373868_C_T	chr11_120421455_T_G	IC61_ICA_integrated_CL_0002057_LPS_2h_chr11_120421455_T_G_cs_1	1320	0.0042633083712913	4.40082414015424	1	IC61	ICA	integrated	CL_0002057_LPS_2h	chr11	1.59193699033464e-08	0.0610790362716039	1	2.94117647058824e-10	6	245	1004	FALSE	FALSE	0.993132312961723	0.993132312961723	120373868	rs7126328
chr11_120421455_T_G	IC61_ICA_integrated	chr11_120383975_C_T	chr11_120421455_T_G	IC61_ICA_integrated_CL_0002057_LPS_2h_chr11_120421455_T_G_cs_1	1331	0.0042633083712913	4.40082414015424	1	IC61	ICA	integrated	CL_0002057_LPS_2h	chr11	1.59193699033464e-08	0.0610790362716039	1	2.94117647058824e-10	6	245	1004	FALSE	FALSE	0.993132312961723	0.993132312961723	120383975	rs1892894
chr11_120421455_T_G	IC61_ICA_integrated	chr11_120390478_A_G	chr11_120421455_T_G	IC61_ICA_integrated_CL_0002057_LPS_2h_chr11_120421455_T_G_cs_1	1338	0.0042633083712913	4.40082414015424	1	IC61	ICA	integrated	CL_0002057_LPS_2h	chr11	1.59193699033464e-08	0.0610790362716039	1	2.94117647058824e-10	6	245	1004	FALSE	FALSE	0.993132312961723	0.993132312961723	120390478
chr11_120421455_T_G	IC61_ICA_integrated	chr11_120392213_G_A	chr11_120421455_T_G	IC61_ICA_integrated_CL_0002057_LPS_2h_chr11_120421455_T_G_cs_1	1341	0.0044728294405737	4.4376561285589	1	IC61	ICA	integrated	CL_0002057_LPS_2h	chr11	1.59193699033464e-08	0.0610790362716039	1	2.94117647058824e-10	6	245	1004	FALSE	FALSE	0.993132312961723	0.993132312961723	120392213	rs7107211
chr11_120421455_T_G	IC61_ICA_integrated	chr11_120393258_A_ATAATT	chr11_120421455_T_G	IC61_ICA_integrated_CL_0002057_LPS_2h_chr11_120421455_T_G_cs_1	1343	0.0042633083712913	4.40082414015424	1	IC61	ICA	integrated	CL_0002057_LPS_2h	chr11	1.59193699033464e-08	0.0610790362716039	1	2.94117647058824e-10	6	245	1004	FALSE	FALSE	0.993132312961723	0.993132312961723	120393258	rs143938075
chr11_120421455_T_G	IC61_ICA_integrated	chr11_120421455_T_G	chr11_120421455_T_G	IC61_ICA_integrated_CL_0002057_LPS_2h_chr11_120421455_T_G_cs_1	1389	0.900757297098081	5.87326239716999	1	IC61	ICA	integrated	CL_0002057_LPS_2h	chr11	1.59193699033464e-08	0.0610790362716039	1	2.94117647058824e-10	6	245	1004	FALSE	FALSE	0.993132312961723	0.993132312961723	120421455	rs72994707
chr11_120421455_T_G	IC61_ICA_integrated	chr11_120424152_G_A	chr11_120421455_T_G	IC61_ICA_integrated_CL_0002057_LPS_2h_chr11_120421455_T_G_cs_1	1396	0.00501272177963075	4.49849615299694	1	IC61	ICA	integrated	CL_0002057_LPS_2h	chr11	1.59193699033464e-08	0.0610790362716039	1	2.94117647058824e-10	6	245	1004	FALSE	FALSE	0.993132312961723	0.993132312961723	120424152	rs7115714
chr11_130402490_T_G	IC156_ICA_integrated	chr11_130402490_T_G	chr11_130402490_T_G	IC156_ICA_integrated_CL_0002057_naive_chr11_130402490_T_G_cs_1	884	0.640619051926617	5.57234593279793	1	IC156	ICA	integrated	CL_0002057_naive	chr11	3.85177291186818e-08	0.0695453411779228	1	2.94117647058824e-10	1	1	978	FALSE	FALSE	0.0532013273132788	0.0532013273132788	130402490	rs112944024
chr11_130402490_T_G	IC156_ICA_integrated	chr11_130405477_C_T	chr11_130402490_T_G	IC156_ICA_integrated_CL_0002057_naive_chr11_130402490_T_G_cs_1	888	0.0516909301472486	5.06158244060537	1	IC156	ICA	integrated	CL_0002057_naive	chr11	3.85177291186818e-08	0.0695453411779228	1	2.94117647058824e-10	1	1	978	FALSE	FALSE	0.0532013273132788	0.0532013273132788	130405477
chr11_130402490_T_G	IC156_ICA_integrated	chr11_130406403_T_C	chr11_130402490_T_G	IC156_ICA_integrated_CL_0002057_naive_chr11_130402490_T_G_cs_1	892	0.309484363735466	5.4448577724945	1	IC156	ICA	integrated	CL_0002057_naive	chr11	3.85177291186818e-08	0.0695453411779228	1	2.94117647058824e-10	1	1	978	FALSE	FALSE	0.0532013273132788	0.0532013273132788	130406403	rs75793630
chr11_19768624_A_G	Cluster_6196_funcExplorer_separate_CL_0000625_naive	chr11_19764736_T_C	chr11_19768624_A_G	Cluster_6196_funcExplorer_separate_CL_0000625_naive_chr11_19768624_A_G_cs_1	1149	0.0919596694025635	-5.54067511206241	1	Cluster_6196	funcExplorer	separate	CL_0000625_naive	chr11	6.49103918247802e-09	0.810773427735476	1	3.14465408805031e-10	6	64	11	FALSE	FALSE	6.38059457318447e-13	6.38059457318447e-13	19764736	rs1425232
chr11_19768624_A_G	Cluster_6196_funcExplorer_separate_CL_0000625_naive	chr11_19764853_G_C	chr11_19768624_A_G	Cluster_6196_funcExplorer_separate_CL_0000625_naive_chr11_19768624_A_G_cs_1	1150	0.0210775642108654	-5.21804664614819	1	Cluster_6196	funcExplorer	separate	CL_0000625_naive	chr11	6.49103918247802e-09	0.810773427735476	1	3.14465408805031e-10	6	64	11	FALSE	FALSE	6.38059457318447e-13	6.38059457318447e-13	19764853	rs1425233
chr11_19768624_A_G	Cluster_6196_funcExplorer_separate_CL_0000625_naive	chr11_19765094_T_C	chr11_19768624_A_G	Cluster_6196_funcExplorer_separate_CL_0000625_naive_chr11_19768624_A_G_cs_1	1151	0.0264567484779357	-5.35000123365788	1	Cluster_6196	funcExplorer	separate	CL_0000625_naive	chr11	6.49103918247802e-09	0.810773427735476	1	3.14465408805031e-10	6	64	11	FALSE	FALSE	6.38059457318447e-13	6.38059457318447e-13	19765094	rs11025246
chr11_19768624_A_G	Cluster_6196_funcExplorer_separate_CL_0000625_naive	chr11_19765507_C_A	chr11_19768624_A_G	Cluster_6196_funcExplorer_separate_CL_0000625_naive_chr11_19768624_A_G_cs_1	1153	0.0248999442845911	-5.25424715997152	1	Cluster_6196	funcExplorer	separate	CL_0000625_naive	chr11	6.49103918247802e-09	0.810773427735476	1	3.14465408805031e-10	6	64	11	FALSE	FALSE	6.38059457318447e-13	6.38059457318447e-13	19765507	rs11819786
chr11_19768624_A_G	Cluster_6196_funcExplorer_separate_CL_0000625_naive	chr11_19766742_A_T	chr11_19768624_A_G	Cluster_6196_funcExplorer_separate_CL_0000625_naive_chr11_19768624_A_G_cs_1	1155	0.0374709450344939	-5.333842000956	1	Cluster_6196	funcExplorer	separate	CL_0000625_naive	chr11	6.49103918247802e-09	0.810773427735476	1	3.14465408805031e-10	6	64	11	FALSE	FALSE	6.38059457318447e-13	6.38059457318447e-13	19766742	rs12797612
chr11_19768624_A_G	Cluster_6196_funcExplorer_separate_CL_0000625_naive	chr11_19767022_C_T	chr11_19768624_A_G	Cluster_6196_funcExplorer_separate_CL_0000625_naive_chr11_19768624_A_G_cs_1	1156	0.0374709450344939	-5.333842000956	1	Cluster_6196	funcExplorer	separate	CL_0000625_naive	chr11	6.49103918247802e-09	0.810773427735476	1	3.14465408805031e-10	6	64	11	FALSE	FALSE	6.38059457318447e-13	6.38059457318447e-13	19767022	rs11025250
chr11_19768624_A_G	Cluster_6196_funcExplorer_separate_CL_0000625_naive	chr11_19767145_T_C	chr11_19768624_A_G	Cluster_6196_funcExplorer_separate_CL_0000625_naive_chr11_19768624_A_G_cs_1	1158	0.0374709450344939	-5.333842000956	1	Cluster_6196	funcExplorer	separate	CL_0000625_naive	chr11	6.49103918247802e-09	0.810773427735476	1	3.14465408805031e-10	6	64	11	FALSE	FALSE	6.38059457318447e-13	6.38059457318447e-13	19767145	rs11025251
chr11_19768624_A_G	Cluster_6196_funcExplorer_separate_CL_0000625_naive	chr11_19768572_T_C	chr11_19768624_A_G	Cluster_6196_funcExplorer_separate_CL_0000625_naive_chr11_19768624_A_G_cs_1	1162	0.0503905380118833	-5.39346416855392	1	Cluster_6196	funcExplorer	separate	CL_0000625_naive	chr11	6.49103918247802e-09	0.810773427735476	1	3.14465408805031e-10	6	64	11	FALSE	FALSE	6.38059457318447e-13	6.38059457318447e-13	19768572	rs2004082
chr11_19768624_A_G	Cluster_6196_funcExplorer_separate_CL_0000625_naive	chr11_19768624_A_G	chr11_19768624_A_G	Cluster_6196_funcExplorer_separate_CL_0000625_naive_chr11_19768624_A_G_cs_1	1163	0.464420278288564	-5.82864957316241	1	Cluster_6196	funcExplorer	separate	CL_0000625_naive	chr11	6.49103918247802e-09	0.810773427735476	1	3.14465408805031e-10	6	64	11	FALSE	FALSE	6.38059457318447e-13	6.38059457318447e-13	19768624	rs2018011
chr11_19768624_A_G	Cluster_6196_funcExplorer_separate_CL_0000625_naive	chr11_19768948_T_C	chr11_19768624_A_G	Cluster_6196_funcExplorer_separate_CL_0000625_naive_chr11_19768624_A_G_cs_1	1164	0.0341667810212047	-5.31651754673754	1	Cluster_6196	funcExplorer	separate	CL_0000625_naive	chr11	6.49103918247802e-09	0.810773427735476	1	3.14465408805031e-10	6	64	11	FALSE	FALSE	6.38059457318447e-13	6.38059457318447e-13	19768948	rs2004083
chr11_19768624_A_G	Cluster_6196_funcExplorer_separate_CL_0000625_naive	chr11_19769658_G_C	chr11_19768624_A_G	Cluster_6196_funcExplorer_separate_CL_0000625_naive_chr11_19768624_A_G_cs_1	1167	0.0174404383360177	-5.15256108544285	1	Cluster_6196	funcExplorer	separate	CL_0000625_naive	chr11	6.49103918247802e-09	0.810773427735476	1	3.14465408805031e-10	6	64	11	FALSE	FALSE	6.38059457318447e-13	6.38059457318447e-13	19769658
chr11_19768624_A_G	Cluster_6196_funcExplorer_separate_CL_0000625_naive	chr11_19772887_T_C	chr11_19768624_A_G	Cluster_6196_funcExplorer_separate_CL_0000625_naive_chr11_19768624_A_G_cs_1	1173	0.100850797500998	-5.52640038399533	1	Cluster_6196	funcExplorer	separate	CL_0000625_naive	chr11	6.49103918247802e-09	0.810773427735476	1	3.14465408805031e-10	6	64	11	FALSE	FALSE	6.38059457318447e-13	6.38059457318447e-13	19772887	rs1425237
chr11_19768624_A_G	Cluster_6196_funcExplorer_separate_CL_0000625_naive	chr11_19774840_A_G	chr11_19768624_A_G	Cluster_6196_funcExplorer_separate_CL_0000625_naive_chr11_19768624_A_G_cs_1	1177	0.0458181208146696	-5.33394848373247	1	Cluster_6196	funcExplorer	separate	CL_0000625_naive	chr11	6.49103918247802e-09	0.810773427735476	1	3.14465408805031e-10	6	64	11	FALSE	FALSE	6.38059457318447e-13	6.38059457318447e-13	19774840	rs7125626
chr11_23512699_G_A	Cluster_5930_funcExplorer_integrated	chr11_23509766_T_A	chr11_23512699_G_A	Cluster_5930_funcExplorer_integrated_CL_0002057_LPS_24h_chr11_23512699_G_A_cs_1	2473	0.0488352464475393	5.27327283980662	1	Cluster_5930	funcExplorer	integrated	CL_0002057_LPS_24h	chr11	1.16716121429916e-08	0.00282505706535677	0.0597412030028371	4e-10	4	1928	6	FALSE	FALSE	0.00151992698475425	0.00151992698475425	23509766	rs2090637
chr11_23512699_G_A	Cluster_5930_funcExplorer_integrated	chr11_23509812_G_A	chr11_23512699_G_A	Cluster_5930_funcExplorer_integrated_CL_0002057_LPS_24h_chr11_23512699_G_A_cs_1	2474	0.0437587840921291	5.24625271317873	1	Cluster_5930	funcExplorer	integrated	CL_0002057_LPS_24h	chr11	1.16716121429916e-08	0.00282505706535677	0.0597412030028371	4e-10	4	1928	6	FALSE	FALSE	0.00151992698475425	0.00151992698475425	23509812	rs2090636
chr11_23512699_G_A	Cluster_5930_funcExplorer_integrated	chr11_23511143_G_C	chr11_23512699_G_A	Cluster_5930_funcExplorer_integrated_CL_0002057_LPS_24h_chr11_23512699_G_A_cs_1	2486	0.0561693982635227	-5.34676919935539	1	Cluster_5930	funcExplorer	integrated	CL_0002057_LPS_24h	chr11	1.16716121429916e-08	0.00282505706535677	0.0597412030028371	4e-10	4	1928	6	FALSE	FALSE	0.00151992698475425	0.00151992698475425	23511143
chr11_23512699_G_A	Cluster_5930_funcExplorer_integrated	chr11_23511397_T_C	chr11_23512699_G_A	Cluster_5930_funcExplorer_integrated_CL_0002057_LPS_24h_chr11_23512699_G_A_cs_1	2494	0.0561693982635227	-5.34676919935539	1	Cluster_5930	funcExplorer	integrated	CL_0002057_LPS_24h	chr11	1.16716121429916e-08	0.00282505706535677	0.0597412030028371	4e-10	4	1928	6	FALSE	FALSE	0.00151992698475425	0.00151992698475425	23511397	rs7926648
chr11_23512699_G_A	Cluster_5930_funcExplorer_integrated	chr11_23511926_G_C	chr11_23512699_G_A	Cluster_5930_funcExplorer_integrated_CL_0002057_LPS_24h_chr11_23512699_G_A_cs_1	2501	0.0533837134116896	-5.30704718580129	1	Cluster_5930	funcExplorer	integrated	CL_0002057_LPS_24h	chr11	1.16716121429916e-08	0.00282505706535677	0.0597412030028371	4e-10	4	1928	6	FALSE	FALSE	0.00151992698475425	0.00151992698475425	23511926	rs7940770
chr11_23512699_G_A	Cluster_5930_funcExplorer_integrated	chr11_23512281_G_C	chr11_23512699_G_A	Cluster_5930_funcExplorer_integrated_CL_0002057_LPS_24h_chr11_23512699_G_A_cs_1	2505	0.081985020865934	-5.35444861946512	1	Cluster_5930	funcExplorer	integrated	CL_0002057_LPS_24h	chr11	1.16716121429916e-08	0.00282505706535677	0.0597412030028371	4e-10	4	1928	6	FALSE	FALSE	0.00151992698475425	0.00151992698475425	23512281	rs1850823
chr11_23512699_G_A	Cluster_5930_funcExplorer_integrated	chr11_23512313_T_TA	chr11_23512699_G_A	Cluster_5930_funcExplorer_integrated_CL_0002057_LPS_24h_chr11_23512699_G_A_cs_1	2506	0.0880294342223001	-5.40994398056177	1	Cluster_5930	funcExplorer	integrated	CL_0002057_LPS_24h	chr11	1.16716121429916e-08	0.00282505706535677	0.0597412030028371	4e-10	4	1928	6	FALSE	FALSE	0.00151992698475425	0.00151992698475425	23512313	rs5790345; rs769656217
chr11_23512699_G_A	Cluster_5930_funcExplorer_integrated	chr11_23512356_C_T	chr11_23512699_G_A	Cluster_5930_funcExplorer_integrated_CL_0002057_LPS_24h_chr11_23512699_G_A_cs_1	2507	0.081985020865934	-5.35444861946512	1	Cluster_5930	funcExplorer	integrated	CL_0002057_LPS_24h	chr11	1.16716121429916e-08	0.00282505706535677	0.0597412030028371	4e-10	4	1928	6	FALSE	FALSE	0.00151992698475425	0.00151992698475425	23512356	rs1850822
chr11_23512699_G_A	Cluster_5930_funcExplorer_integrated	chr11_23512699_G_A	chr11_23512699_G_A	Cluster_5930_funcExplorer_integrated_CL_0002057_LPS_24h_chr11_23512699_G_A_cs_1	2509	0.484727073315608	-5.67592529147694	1	Cluster_5930	funcExplorer	integrated	CL_0002057_LPS_24h	chr11	1.16716121429916e-08	0.00282505706535677	0.0597412030028371	4e-10	4	1928	6	FALSE	FALSE	0.00151992698475425	0.00151992698475425	23512699	rs12577626
chr11_25724633_G_C	Cluster_3573_funcExplorer_integrated	chr11_25673036_A_G	chr11_25724633_G_C	Cluster_3573_funcExplorer_integrated_CL_0000236_naive_chr11_25724633_G_C_cs_1	1570	0.104237266310019	5.15970844159298	1	Cluster_3573	funcExplorer	integrated	CL_0000236_naive	chr11	4.09794725656114e-08	0.0044875166169767	0.0948970711002447	4e-10	7	1219	15	FALSE	FALSE	2.22247664618994e-05	2.22247664618994e-05	25673036	rs117009745
chr11_25724633_G_C	Cluster_3573_funcExplorer_integrated	chr11_25673120_GATTA_G	chr11_25724633_G_C	Cluster_3573_funcExplorer_integrated_CL_0000236_naive_chr11_25724633_G_C_cs_1	1572	0.104237266310019	5.15970844159298	1	Cluster_3573	funcExplorer	integrated	CL_0000236_naive	chr11	4.09794725656114e-08	0.0044875166169767	0.0948970711002447	4e-10	7	1219	15	FALSE	FALSE	2.22247664618994e-05	2.22247664618994e-05	25673120	rs144894995
chr11_25724633_G_C	Cluster_3573_funcExplorer_integrated	chr11_25674279_G_T	chr11_25724633_G_C	Cluster_3573_funcExplorer_integrated_CL_0000236_naive_chr11_25724633_G_C_cs_1	1575	0.0576646205088946	4.98505402232521	1	Cluster_3573	funcExplorer	integrated	CL_0000236_naive	chr11	4.09794725656114e-08	0.0044875166169767	0.0948970711002447	4e-10	7	1219	15	FALSE	FALSE	2.22247664618994e-05	2.22247664618994e-05	25674279	rs73435204
chr11_25724633_G_C	Cluster_3573_funcExplorer_integrated	chr11_25680776_G_A	chr11_25724633_G_C	Cluster_3573_funcExplorer_integrated_CL_0000236_naive_chr11_25724633_G_C_cs_1	1586	0.23036493167375	5.32949961118087	1	Cluster_3573	funcExplorer	integrated	CL_0000236_naive	chr11	4.09794725656114e-08	0.0044875166169767	0.0948970711002447	4e-10	7	1219	15	FALSE	FALSE	2.22247664618994e-05	2.22247664618994e-05	25680776	rs73435211
chr11_25724633_G_C	Cluster_3573_funcExplorer_integrated	chr11_25684719_C_G	chr11_25724633_G_C	Cluster_3573_funcExplorer_integrated_CL_0000236_naive_chr11_25724633_G_C_cs_1	1589	0.0555212282691621	5.02660465642169	1	Cluster_3573	funcExplorer	integrated	CL_0000236_naive	chr11	4.09794725656114e-08	0.0044875166169767	0.0948970711002447	4e-10	7	1219	15	FALSE	FALSE	2.22247664618994e-05	2.22247664618994e-05	25684719
chr11_25724633_G_C	Cluster_3573_funcExplorer_integrated	chr11_25708619_G_A	chr11_25724633_G_C	Cluster_3573_funcExplorer_integrated_CL_0000236_naive_chr11_25724633_G_C_cs_1	1710	0.106837212652867	5.20723536664455	1	Cluster_3573	funcExplorer	integrated	CL_0000236_naive	chr11	4.09794725656114e-08	0.0044875166169767	0.0948970711002447	4e-10	7	1219	15	FALSE	FALSE	2.22247664618994e-05	2.22247664618994e-05	25708619	rs58613092
chr11_25724633_G_C	Cluster_3573_funcExplorer_integrated	chr11_25724633_G_C	chr11_25724633_G_C	Cluster_3573_funcExplorer_integrated_CL_0000236_naive_chr11_25724633_G_C_cs_1	1811	0.324012824641996	5.43019877492188	1	Cluster_3573	funcExplorer	integrated	CL_0000236_naive	chr11	4.09794725656114e-08	0.0044875166169767	0.0948970711002447	4e-10	7	1219	15	FALSE	FALSE	2.22247664618994e-05	2.22247664618994e-05	25724633	rs7118385
chr11_56352114_TTTTATTTATTTATTTATTTA_T	MEsaddlebrown_WGCNA_integrated	chr11_56045508_T_A	chr11_56352114_TTTTATTTATTTATTTATTTA_T	MEsaddlebrown_WGCNA_integrated_CL_0000625_naive_chr11_56352114_TTTTATTTATTTATTTATTTA_T_cs_1	1461	0.00708969542612969	4.57162050554688	1	MEsaddlebrown	WGCNA	integrated	CL_0000625_naive	chr11	2.72611417770304e-08	0.743987357256722	1	1e-09	15	420	84	FALSE	FALSE	6.6154303526674e-10	6.6154303526674e-10	56045508	rs79800180
chr11_56352114_TTTTATTTATTTATTTATTTA_T	MEsaddlebrown_WGCNA_integrated	chr11_56285045_T_C	chr11_56352114_TTTTATTTATTTATTTATTTA_T	MEsaddlebrown_WGCNA_integrated_CL_0000625_naive_chr11_56352114_TTTTATTTATTTATTTATTTA_T_cs_1	2576	0.00376083223040524	4.2916105297976	1	MEsaddlebrown	WGCNA	integrated	CL_0000625_naive	chr11	2.72611417770304e-08	0.743987357256722	1	1e-09	15	420	84	FALSE	FALSE	6.6154303526674e-10	6.6154303526674e-10	56285045	rs11227763
chr11_56352114_TTTTATTTATTTATTTATTTA_T	MEsaddlebrown_WGCNA_integrated	chr11_56352114_TTTTATTTATTTATTTATTTA_T	chr11_56352114_TTTTATTTATTTATTTATTTA_T	MEsaddlebrown_WGCNA_integrated_CL_0000625_naive_chr11_56352114_TTTTATTTATTTATTTATTTA_T_cs_1	2821	0.880899764057804	-5.63579007782897	1	MEsaddlebrown	WGCNA	integrated	CL_0000625_naive	chr11	2.72611417770304e-08	0.743987357256722	1	1e-09	15	420	84	FALSE	FALSE	6.6154303526674e-10	6.6154303526674e-10	56352114	rs148864693
chr11_56352114_TTTTATTTATTTATTTATTTA_T	MEsaddlebrown_WGCNA_integrated	chr11_56407758_A_G	chr11_56352114_TTTTATTTATTTATTTATTTA_T	MEsaddlebrown_WGCNA_integrated_CL_0000625_naive_chr11_56352114_TTTTATTTATTTATTTATTTA_T_cs_1	3055	0.0029720132589256	4.18601461972259	1	MEsaddlebrown	WGCNA	integrated	CL_0000625_naive	chr11	2.72611417770304e-08	0.743987357256722	1	1e-09	15	420	84	FALSE	FALSE	6.6154303526674e-10	6.6154303526674e-10	56407758	rs34434887
chr11_56352114_TTTTATTTATTTATTTATTTA_T	MEsaddlebrown_WGCNA_integrated	chr11_56416704_G_A	chr11_56352114_TTTTATTTATTTATTTATTTA_T	MEsaddlebrown_WGCNA_integrated_CL_0000625_naive_chr11_56352114_TTTTATTTATTTATTTATTTA_T_cs_1	3101	0.00787657353682114	4.58034009591048	1	MEsaddlebrown	WGCNA	integrated	CL_0000625_naive	chr11	2.72611417770304e-08	0.743987357256722	1	1e-09	15	420	84	FALSE	FALSE	6.6154303526674e-10	6.6154303526674e-10	56416704	rs75959672
chr11_56352114_TTTTATTTATTTATTTATTTA_T	MEsaddlebrown_WGCNA_integrated	chr11_56424555_G_A	chr11_56352114_TTTTATTTATTTATTTATTTA_T	MEsaddlebrown_WGCNA_integrated_CL_0000625_naive_chr11_56352114_TTTTATTTATTTATTTATTTA_T_cs_1	3138	0.00787657353682114	4.58034009591048	1	MEsaddlebrown	WGCNA	integrated	CL_0000625_naive	chr11	2.72611417770304e-08	0.743987357256722	1	1e-09	15	420	84	FALSE	FALSE	6.6154303526674e-10	6.6154303526674e-10	56424555	rs11228329
chr11_56352114_TTTTATTTATTTATTTATTTA_T	MEsaddlebrown_WGCNA_integrated	chr11_56428664_AT_ATTT	chr11_56352114_TTTTATTTATTTATTTATTTA_T	MEsaddlebrown_WGCNA_integrated_CL_0000625_naive_chr11_56352114_TTTTATTTATTTATTTATTTA_T_cs_1	3161	0.00312929546003271	4.23161904796199	1	MEsaddlebrown	WGCNA	integrated	CL_0000625_naive	chr11	2.72611417770304e-08	0.743987357256722	1	1e-09	15	420	84	FALSE	FALSE	6.6154303526674e-10	6.6154303526674e-10	56428664
chr11_56352114_TTTTATTTATTTATTTATTTA_T	MEsaddlebrown_WGCNA_integrated	chr11_56444016_AAAAT_AAAATAAAT	chr11_56352114_TTTTATTTATTTATTTATTTA_T	MEsaddlebrown_WGCNA_integrated_CL_0000625_naive_chr11_56352114_TTTTATTTATTTATTTATTTA_T_cs_1	3226	0.00336164751349821	4.25305428888538	1	MEsaddlebrown	WGCNA	integrated	CL_0000625_naive	chr11	2.72611417770304e-08	0.743987357256722	1	1e-09	15	420	84	FALSE	FALSE	6.6154303526674e-10	6.6154303526674e-10	56444016
chr11_56352114_TTTTATTTATTTATTTATTTA_T	MEsaddlebrown_WGCNA_integrated	chr11_56446298_T_C	chr11_56352114_TTTTATTTATTTATTTATTTA_T	MEsaddlebrown_WGCNA_integrated_CL_0000625_naive_chr11_56352114_TTTTATTTATTTATTTATTTA_T_cs_1	3238	0.00502780388846424	4.43926925971199	1	MEsaddlebrown	WGCNA	integrated	CL_0000625_naive	chr11	2.72611417770304e-08	0.743987357256722	1	1e-09	15	420	84	FALSE	FALSE	6.6154303526674e-10	6.6154303526674e-10	56446298	rs635236
chr11_56352114_TTTTATTTATTTATTTATTTA_T	MEsaddlebrown_WGCNA_integrated	chr11_56464058_C_T	chr11_56352114_TTTTATTTATTTATTTATTTA_T	MEsaddlebrown_WGCNA_integrated_CL_0000625_naive_chr11_56352114_TTTTATTTATTTATTTATTTA_T_cs_1	3291	0.00502780388846424	4.43926925971199	1	MEsaddlebrown	WGCNA	integrated	CL_0000625_naive	chr11	2.72611417770304e-08	0.743987357256722	1	1e-09	15	420	84	FALSE	FALSE	6.6154303526674e-10	6.6154303526674e-10	56464058	rs679395
chr11_56352114_TTTTATTTATTTATTTATTTA_T	MEsaddlebrown_WGCNA_integrated	chr11_56484375_T_C	chr11_56352114_TTTTATTTATTTATTTATTTA_T	MEsaddlebrown_WGCNA_integrated_CL_0000625_naive_chr11_56352114_TTTTATTTATTTATTTATTTA_T_cs_1	3367	0.00502780388846424	4.43926925971199	1	MEsaddlebrown	WGCNA	integrated	CL_0000625_naive	chr11	2.72611417770304e-08	0.743987357256722	1	1e-09	15	420	84	FALSE	FALSE	6.6154303526674e-10	6.6154303526674e-10	56484375	rs597727
chr11_56352114_TTTTATTTATTTATTTATTTA_T	MEsaddlebrown_WGCNA_integrated	chr11_56494393_C_T	chr11_56352114_TTTTATTTATTTATTTATTTA_T	MEsaddlebrown_WGCNA_integrated_CL_0000625_naive_chr11_56352114_TTTTATTTATTTATTTATTTA_T_cs_1	3394	0.00502780388846424	4.43926925971199	1	MEsaddlebrown	WGCNA	integrated	CL_0000625_naive	chr11	2.72611417770304e-08	0.743987357256722	1	1e-09	15	420	84	FALSE	FALSE	6.6154303526674e-10	6.6154303526674e-10	56494393	rs2511144
chr11_56352114_TTTTATTTATTTATTTATTTA_T	MEsaddlebrown_WGCNA_integrated	chr11_56498680_G_A	chr11_56352114_TTTTATTTATTTATTTATTTA_T	MEsaddlebrown_WGCNA_integrated_CL_0000625_naive_chr11_56352114_TTTTATTTATTTATTTATTTA_T_cs_1	3418	0.00502780388846424	4.43926925971199	1	MEsaddlebrown	WGCNA	integrated	CL_0000625_naive	chr11	2.72611417770304e-08	0.743987357256722	1	1e-09	15	420	84	FALSE	FALSE	6.6154303526674e-10	6.6154303526674e-10	56498680	rs633866
chr11_56352114_TTTTATTTATTTATTTATTTA_T	MEsaddlebrown_WGCNA_integrated	chr11_56509236_C_T	chr11_56352114_TTTTATTTATTTATTTATTTA_T	MEsaddlebrown_WGCNA_integrated_CL_0000625_naive_chr11_56352114_TTTTATTTATTTATTTATTTA_T_cs_1	3465	0.00502780388846424	4.43926925971199	1	MEsaddlebrown	WGCNA	integrated	CL_0000625_naive	chr11	2.72611417770304e-08	0.743987357256722	1	1e-09	15	420	84	FALSE	FALSE	6.6154303526674e-10	6.6154303526674e-10	56509236	rs11228630
chr11_56352114_TTTTATTTATTTATTTATTTA_T	MEsaddlebrown_WGCNA_integrated	chr11_56559502_C_T	chr11_56352114_TTTTATTTATTTATTTATTTA_T	MEsaddlebrown_WGCNA_integrated_CL_0000625_naive_chr11_56352114_TTTTATTTATTTATTTATTTA_T_cs_1	3685	0.00345117305407683	4.27226078815193	1	MEsaddlebrown	WGCNA	integrated	CL_0000625_naive	chr11	2.72611417770304e-08	0.743987357256722	1	1e-09	15	420	84	FALSE	FALSE	6.6154303526674e-10	6.6154303526674e-10	56559502	rs11228653
chr11_56352114_TTTTATTTATTTATTTATTTA_T	MEsaddlebrown_WGCNA_integrated	chr11_56560240_G_T	chr11_56352114_TTTTATTTATTTATTTATTTA_T	MEsaddlebrown_WGCNA_integrated_CL_0000625_naive_chr11_56352114_TTTTATTTATTTATTTATTTA_T_cs_1	3688	0.00345117305407683	4.27226078815193	1	MEsaddlebrown	WGCNA	integrated	CL_0000625_naive	chr11	2.72611417770304e-08	0.743987357256722	1	1e-09	15	420	84	FALSE	FALSE	6.6154303526674e-10	6.6154303526674e-10	56560240	rs76797979
chr11_56352114_TTTTATTTATTTATTTATTTA_T	MEsaddlebrown_WGCNA_integrated	chr11_56625581_G_A	chr11_56352114_TTTTATTTATTTATTTATTTA_T	MEsaddlebrown_WGCNA_integrated_CL_0000625_naive_chr11_56352114_TTTTATTTATTTATTTATTTA_T_cs_1	3923	0.00289026185503993	4.17370040825154	1	MEsaddlebrown	WGCNA	integrated	CL_0000625_naive	chr11	2.72611417770304e-08	0.743987357256722	1	1e-09	15	420	84	FALSE	FALSE	6.6154303526674e-10	6.6154303526674e-10	56625581	rs142980059
chr11_56352114_TTTTATTTATTTATTTATTTA_T	MEsaddlebrown_WGCNA_integrated	chr11_56721868_GTCTATCTA_G	chr11_56352114_TTTTATTTATTTATTTATTTA_T	MEsaddlebrown_WGCNA_integrated_CL_0000625_naive_chr11_56352114_TTTTATTTATTTATTTATTTA_T_cs_1	4258	0.0064776407548861	4.525608209363	1	MEsaddlebrown	WGCNA	integrated	CL_0000625_naive	chr11	2.72611417770304e-08	0.743987357256722	1	1e-09	15	420	84	FALSE	FALSE	6.6154303526674e-10	6.6154303526674e-10	56721868	rs529507556
chr11_56352114_TTTTATTTATTTATTTATTTA_T	MEsaddlebrown_WGCNA_integrated	chr11_56731361_T_C	chr11_56352114_TTTTATTTATTTATTTATTTA_T	MEsaddlebrown_WGCNA_integrated_CL_0000625_naive_chr11_56352114_TTTTATTTATTTATTTATTTA_T_cs_1	4323	0.00406698970476127	4.28543925990046	1	MEsaddlebrown	WGCNA	integrated	CL_0000625_naive	chr11	2.72611417770304e-08	0.743987357256722	1	1e-09	15	420	84	FALSE	FALSE	6.6154303526674e-10	6.6154303526674e-10	56731361	rs602158
chr11_56352114_TTTTATTTATTTATTTATTTA_T	MEsaddlebrown_WGCNA_integrated	chr11_56741128_T_C	chr11_56352114_TTTTATTTATTTATTTATTTA_T	MEsaddlebrown_WGCNA_integrated_CL_0000625_naive_chr11_56352114_TTTTATTTATTTATTTATTTA_T_cs_1	4368	0.00406698970476127	4.28543925990046	1	MEsaddlebrown	WGCNA	integrated	CL_0000625_naive	chr11	2.72611417770304e-08	0.743987357256722	1	1e-09	15	420	84	FALSE	FALSE	6.6154303526674e-10	6.6154303526674e-10	56741128
chr11_56352114_TTTTATTTATTTATTTATTTA_T	MEsaddlebrown_WGCNA_integrated	chr11_56781393_A_G	chr11_56352114_TTTTATTTATTTATTTATTTA_T	MEsaddlebrown_WGCNA_integrated_CL_0000625_naive_chr11_56352114_TTTTATTTATTTATTTATTTA_T_cs_1	4502	0.00680240150476141	4.56708677208386	1	MEsaddlebrown	WGCNA	integrated	CL_0000625_naive	chr11	2.72611417770304e-08	0.743987357256722	1	1e-09	15	420	84	FALSE	FALSE	6.6154303526674e-10	6.6154303526674e-10	56781393	rs548178
chr11_56352114_TTTTATTTATTTATTTATTTA_T	MEsaddlebrown_WGCNA_integrated	chr11_56790057_A_C	chr11_56352114_TTTTATTTATTTATTTATTTA_T	MEsaddlebrown_WGCNA_integrated_CL_0000625_naive_chr11_56352114_TTTTATTTATTTATTTATTTA_T_cs_1	4551	0.00275089585115296	4.09699801255002	1	MEsaddlebrown	WGCNA	integrated	CL_0000625_naive	chr11	2.72611417770304e-08	0.743987357256722	1	1e-09	15	420	84	FALSE	FALSE	6.6154303526674e-10	6.6154303526674e-10	56790057
chr11_56352114_TTTTATTTATTTATTTATTTA_T	MEsaddlebrown_WGCNA_integrated	chr11_56790903_G_A	chr11_56352114_TTTTATTTATTTATTTATTTA_T	MEsaddlebrown_WGCNA_integrated_CL_0000625_naive_chr11_56352114_TTTTATTTATTTATTTATTTA_T_cs_1	4554	0.00275089585115296	4.09699801255002	1	MEsaddlebrown	WGCNA	integrated	CL_0000625_naive	chr11	2.72611417770304e-08	0.743987357256722	1	1e-09	15	420	84	FALSE	FALSE	6.6154303526674e-10	6.6154303526674e-10	56790903
chr11_56352114_TTTTATTTATTTATTTATTTA_T	MEsaddlebrown_WGCNA_integrated	chr11_56794268_C_G	chr11_56352114_TTTTATTTATTTATTTATTTA_T	MEsaddlebrown_WGCNA_integrated_CL_0000625_naive_chr11_56352114_TTTTATTTATTTATTTATTTA_T_cs_1	4569	0.00275089585115296	4.09699801255002	1	MEsaddlebrown	WGCNA	integrated	CL_0000625_naive	chr11	2.72611417770304e-08	0.743987357256722	1	1e-09	15	420	84	FALSE	FALSE	6.6154303526674e-10	6.6154303526674e-10	56794268	rs473503
chr11_56352114_TTTTATTTATTTATTTATTTA_T	MEsaddlebrown_WGCNA_integrated	chr11_56798882_T_C	chr11_56352114_TTTTATTTATTTATTTATTTA_T	MEsaddlebrown_WGCNA_integrated_CL_0000625_naive_chr11_56352114_TTTTATTTATTTATTTATTTA_T_cs_1	4592	0.00275089585115296	4.09699801255002	1	MEsaddlebrown	WGCNA	integrated	CL_0000625_naive	chr11	2.72611417770304e-08	0.743987357256722	1	1e-09	15	420	84	FALSE	FALSE	6.6154303526674e-10	6.6154303526674e-10	56798882	rs559457
chr11_56352114_TTTTATTTATTTATTTATTTA_T	MEsaddlebrown_WGCNA_integrated	chr11_56799900_G_A	chr11_56352114_TTTTATTTATTTATTTATTTA_T	MEsaddlebrown_WGCNA_integrated_CL_0000625_naive_chr11_56352114_TTTTATTTATTTATTTATTTA_T_cs_1	4598	0.00275089585115296	4.09699801255002	1	MEsaddlebrown	WGCNA	integrated	CL_0000625_naive	chr11	2.72611417770304e-08	0.743987357256722	1	1e-09	15	420	84	FALSE	FALSE	6.6154303526674e-10	6.6154303526674e-10	56799900	rs692748
chr11_56352114_TTTTATTTATTTATTTATTTA_T	MEsaddlebrown_WGCNA_integrated	chr11_56802536_C_T	chr11_56352114_TTTTATTTATTTATTTATTTA_T	MEsaddlebrown_WGCNA_integrated_CL_0000625_naive_chr11_56352114_TTTTATTTATTTATTTATTTA_T_cs_1	4610	0.00275089585115296	4.09699801255002	1	MEsaddlebrown	WGCNA	integrated	CL_0000625_naive	chr11	2.72611417770304e-08	0.743987357256722	1	1e-09	15	420	84	FALSE	FALSE	6.6154303526674e-10	6.6154303526674e-10	56802536	rs552409
chr11_56352114_TTTTATTTATTTATTTATTTA_T	MEsaddlebrown_WGCNA_integrated	chr11_56802619_A_T	chr11_56352114_TTTTATTTATTTATTTATTTA_T	MEsaddlebrown_WGCNA_integrated_CL_0000625_naive_chr11_56352114_TTTTATTTATTTATTTATTTA_T_cs_1	4612	0.00275089585115296	4.09699801255002	1	MEsaddlebrown	WGCNA	integrated	CL_0000625_naive	chr11	2.72611417770304e-08	0.743987357256722	1	1e-09	15	420	84	FALSE	FALSE	6.6154303526674e-10	6.6154303526674e-10	56802619	rs483365
chr11_56352114_TTTTATTTATTTATTTATTTA_T	MEsaddlebrown_WGCNA_integrated	chr11_56802753_G_A	chr11_56352114_TTTTATTTATTTATTTATTTA_T	MEsaddlebrown_WGCNA_integrated_CL_0000625_naive_chr11_56352114_TTTTATTTATTTATTTATTTA_T_cs_1	4613	0.00275089585115296	4.09699801255002	1	MEsaddlebrown	WGCNA	integrated	CL_0000625_naive	chr11	2.72611417770304e-08	0.743987357256722	1	1e-09	15	420	84	FALSE	FALSE	6.6154303526674e-10	6.6154303526674e-10	56802753	rs550500
chr11_56352114_TTTTATTTATTTATTTATTTA_T	MEsaddlebrown_WGCNA_integrated	chr11_56809611_C_G	chr11_56352114_TTTTATTTATTTATTTATTTA_T	MEsaddlebrown_WGCNA_integrated_CL_0000625_naive_chr11_56352114_TTTTATTTATTTATTTATTTA_T_cs_1	4652	0.00426478115862616	4.40346927261657	1	MEsaddlebrown	WGCNA	integrated	CL_0000625_naive	chr11	2.72611417770304e-08	0.743987357256722	1	1e-09	15	420	84	FALSE	FALSE	6.6154303526674e-10	6.6154303526674e-10	56809611	rs492536
chr11_56352114_TTTTATTTATTTATTTATTTA_T	MEsaddlebrown_WGCNA_integrated	chr11_56844764_C_T	chr11_56352114_TTTTATTTATTTATTTATTTA_T	MEsaddlebrown_WGCNA_integrated_CL_0000625_naive_chr11_56352114_TTTTATTTATTTATTTATTTA_T_cs_1	4814	0.00320030626913337	4.07130062686641	1	MEsaddlebrown	WGCNA	integrated	CL_0000625_naive	chr11	2.72611417770304e-08	0.743987357256722	1	1e-09	15	420	84	FALSE	FALSE	6.6154303526674e-10	6.6154303526674e-10	56844764	rs1792503
chr11_56352114_TTTTATTTATTTATTTATTTA_T	MEsaddlebrown_WGCNA_integrated	chr11_56846036_A_G	chr11_56352114_TTTTATTTATTTATTTATTTA_T	MEsaddlebrown_WGCNA_integrated_CL_0000625_naive_chr11_56352114_TTTTATTTATTTATTTATTTA_T_cs_1	4826	0.00290040957284954	4.12854348377285	1	MEsaddlebrown	WGCNA	integrated	CL_0000625_naive	chr11	2.72611417770304e-08	0.743987357256722	1	1e-09	15	420	84	FALSE	FALSE	6.6154303526674e-10	6.6154303526674e-10	56846036	rs599917
chr11_56352114_TTTTATTTATTTATTTATTTA_T	MEsaddlebrown_WGCNA_integrated	chr11_56847878_G_A	chr11_56352114_TTTTATTTATTTATTTATTTA_T	MEsaddlebrown_WGCNA_integrated_CL_0000625_naive_chr11_56352114_TTTTATTTATTTATTTATTTA_T_cs_1	4833	0.00290040957284954	4.12854348377285	1	MEsaddlebrown	WGCNA	integrated	CL_0000625_naive	chr11	2.72611417770304e-08	0.743987357256722	1	1e-09	15	420	84	FALSE	FALSE	6.6154303526674e-10	6.6154303526674e-10	56847878
chr11_56352114_TTTTATTTATTTATTTATTTA_T	MEsaddlebrown_WGCNA_integrated	chr11_56848399_G_A	chr11_56352114_TTTTATTTATTTATTTATTTA_T	MEsaddlebrown_WGCNA_integrated_CL_0000625_naive_chr11_56352114_TTTTATTTATTTATTTATTTA_T_cs_1	4834	0.00290040957284954	4.12854348377285	1	MEsaddlebrown	WGCNA	integrated	CL_0000625_naive	chr11	2.72611417770304e-08	0.743987357256722	1	1e-09	15	420	84	FALSE	FALSE	6.6154303526674e-10	6.6154303526674e-10	56848399	rs500127
chr11_56352114_TTTTATTTATTTATTTATTTA_T	MEsaddlebrown_WGCNA_integrated	chr11_56850068_G_A	chr11_56352114_TTTTATTTATTTATTTATTTA_T	MEsaddlebrown_WGCNA_integrated_CL_0000625_naive_chr11_56352114_TTTTATTTATTTATTTATTTA_T_cs_1	4843	0.00290040957284954	4.12854348377285	1	MEsaddlebrown	WGCNA	integrated	CL_0000625_naive	chr11	2.72611417770304e-08	0.743987357256722	1	1e-09	15	420	84	FALSE	FALSE	6.6154303526674e-10	6.6154303526674e-10	56850068	rs560518
chr11_56876110_C_T	MEivory_WGCNA_integrated	chr11_56876110_C_T	chr11_56876110_C_T	MEivory_WGCNA_integrated_CL_0000625_naive_chr11_56876110_C_T_cs_1	2042	0.560377744583233	-5.80699668719418	1	MEivory	WGCNA	integrated	CL_0000625_naive	chr11	3.29272238996455e-08	0.753051757000021	1	1e-09	16	860	53	FALSE	FALSE	1.336017397152e-09	1.336017397152e-09	56876110	rs1938746
chr11_56876110_C_T	MEivory_WGCNA_integrated	chr11_56894195_A_G	chr11_56876110_C_T	MEivory_WGCNA_integrated_CL_0000625_naive_chr11_56876110_C_T_cs_1	2097	0.153726480711686	-5.51594276307257	1	MEivory	WGCNA	integrated	CL_0000625_naive	chr11	3.29272238996455e-08	0.753051757000021	1	1e-09	16	860	53	FALSE	FALSE	1.336017397152e-09	1.336017397152e-09	56894195	rs4938844
chr11_56876110_C_T	MEivory_WGCNA_integrated	chr11_56894404_G_A	chr11_56876110_C_T	MEivory_WGCNA_integrated_CL_0000625_naive_chr11_56876110_C_T_cs_1	2098	0.218894328430931	-5.56040984993452	1	MEivory	WGCNA	integrated	CL_0000625_naive	chr11	3.29272238996455e-08	0.753051757000021	1	1e-09	16	860	53	FALSE	FALSE	1.336017397152e-09	1.336017397152e-09	56894404	rs4938845
chr11_56876110_C_T	MEivory_WGCNA_integrated	chr11_56912065_C_T	chr11_56876110_C_T	MEivory_WGCNA_integrated_CL_0000625_naive_chr11_56876110_C_T_cs_1	2151	0.0193736286458687	-5.10622382009902	1	MEivory	WGCNA	integrated	CL_0000625_naive	chr11	3.29272238996455e-08	0.753051757000021	1	1e-09	16	860	53	FALSE	FALSE	1.336017397152e-09	1.336017397152e-09	56912065
chr11_56876110_C_T	MEivory_WGCNA_integrated	chr11_56917436_G_C	chr11_56876110_C_T	MEivory_WGCNA_integrated_CL_0000625_naive_chr11_56876110_C_T_cs_1	2169	0.0193736286458687	-5.10622382009902	1	MEivory	WGCNA	integrated	CL_0000625_naive	chr11	3.29272238996455e-08	0.753051757000021	1	1e-09	16	860	53	FALSE	FALSE	1.336017397152e-09	1.336017397152e-09	56917436	rs72911880
chr11_62141200_G_A	Cluster_4624_funcExplorer_integrated	chr11_62141200_G_A	chr11_62141200_G_A	Cluster_4624_funcExplorer_integrated_CL_0002057_IFNg_24h_chr11_62141200_G_A_cs_1	1268	0.996900524353658	5.68520072986646	1	Cluster_4624	funcExplorer	integrated	CL_0002057_IFNg_24h	chr11	1.897824185914e-08	0.00376592955162841	0.079637740630844	4e-10	9	132	115	FALSE	FALSE	1.42658669308924e-07	1.42658669308924e-07	62141200	rs1675123
chr11_72722182_G_GGA	MEtan_WGCNA_integrated	chr11_72722182_G_GGA	chr11_72722182_G_GGA	MEtan_WGCNA_integrated_CL_0000233_naive_chr11_72722182_G_GGA_cs_1	906	0.966157942410186	-5.6743578314209	1	MEtan	WGCNA	integrated	CL_0000233_naive	chr11	4.70687476806297e-08	0.768879825980607	1	1e-09	12	223	268	FALSE	FALSE	0.000110813037875291	0.000110813037875291	72722182	rs10675016; rs771006617; rs35983220
chr11_74543826_G_T	Cluster_6384_funcExplorer_integrated	chr11_74510031_CTT_C	chr11_74523639_TA_T	Cluster_6384_funcExplorer_integrated_CL_0002057_LPS_24h_chr11_74523639_TA_T_cs_1	854	0.0109342365875951	-5.55450524822378	1	Cluster_6384	funcExplorer	integrated	CL_0002057_LPS_24h	chr11	1.16247392788859e-08	0.0028171089000366	0.0595731239350844	4e-10	17	577	57	FALSE	FALSE	9.60813792249263e-13	9.60813792249263e-13	74510031	rs138160477; rs57498039
chr11_74543826_G_T	Cluster_6384_funcExplorer_integrated	chr11_74510047_A_G	chr11_74523639_TA_T	Cluster_6384_funcExplorer_integrated_CL_0002057_LPS_24h_chr11_74523639_TA_T_cs_1	855	0.0109342365875951	-5.55450524822378	1	Cluster_6384	funcExplorer	integrated	CL_0002057_LPS_24h	chr11	1.16247392788859e-08	0.0028171089000366	0.0595731239350844	4e-10	17	577	57	FALSE	FALSE	9.60813792249263e-13	9.60813792249263e-13	74510047	rs602936
chr11_74543826_G_T	Cluster_6384_funcExplorer_integrated	chr11_74511061_G_C	chr11_74523639_TA_T	Cluster_6384_funcExplorer_integrated_CL_0002057_LPS_24h_chr11_74523639_TA_T_cs_1	858	0.0109116755473386	-5.55754342524248	1	Cluster_6384	funcExplorer	integrated	CL_0002057_LPS_24h	chr11	1.16247392788859e-08	0.0028171089000366	0.0595731239350844	4e-10	17	577	57	FALSE	FALSE	9.60813792249263e-13	9.60813792249263e-13	74511061	rs617343
chr11_74543826_G_T	Cluster_6384_funcExplorer_integrated	chr11_74516155_A_G	chr11_74523639_TA_T	Cluster_6384_funcExplorer_integrated_CL_0002057_LPS_24h_chr11_74523639_TA_T_cs_1	868	0.0130496287759372	-5.62295472149095	1	Cluster_6384	funcExplorer	integrated	CL_0002057_LPS_24h	chr11	1.16247392788859e-08	0.0028171089000366	0.0595731239350844	4e-10	17	577	57	FALSE	FALSE	9.60813792249263e-13	9.60813792249263e-13	74516155
chr11_74543826_G_T	Cluster_6384_funcExplorer_integrated	chr11_74516405_A_G	chr11_74523639_TA_T	Cluster_6384_funcExplorer_integrated_CL_0002057_LPS_24h_chr11_74523639_TA_T_cs_1	869	0.0130496287759372	-5.62295472149095	1	Cluster_6384	funcExplorer	integrated	CL_0002057_LPS_24h	chr11	1.16247392788859e-08	0.0028171089000366	0.0595731239350844	4e-10	17	577	57	FALSE	FALSE	9.60813792249263e-13	9.60813792249263e-13	74516405	rs1280207
chr11_74543826_G_T	Cluster_6384_funcExplorer_integrated	chr11_74517911_A_G	chr11_74523639_TA_T	Cluster_6384_funcExplorer_integrated_CL_0002057_LPS_24h_chr11_74523639_TA_T_cs_1	871	0.0126147664974536	-5.59608805603756	1	Cluster_6384	funcExplorer	integrated	CL_0002057_LPS_24h	chr11	1.16247392788859e-08	0.0028171089000366	0.0595731239350844	4e-10	17	577	57	FALSE	FALSE	9.60813792249263e-13	9.60813792249263e-13	74517911
chr11_74543826_G_T	Cluster_6384_funcExplorer_integrated	chr11_74518676_T_C	chr11_74523639_TA_T	Cluster_6384_funcExplorer_integrated_CL_0002057_LPS_24h_chr11_74523639_TA_T_cs_1	873	0.0126147664974536	-5.59608805603756	1	Cluster_6384	funcExplorer	integrated	CL_0002057_LPS_24h	chr11	1.16247392788859e-08	0.0028171089000366	0.0595731239350844	4e-10	17	577	57	FALSE	FALSE	9.60813792249263e-13	9.60813792249263e-13	74518676
chr11_74543826_G_T	Cluster_6384_funcExplorer_integrated	chr11_74518683_A_G	chr11_74523639_TA_T	Cluster_6384_funcExplorer_integrated_CL_0002057_LPS_24h_chr11_74523639_TA_T_cs_1	874	0.0126147664974536	-5.59608805603756	1	Cluster_6384	funcExplorer	integrated	CL_0002057_LPS_24h	chr11	1.16247392788859e-08	0.0028171089000366	0.0595731239350844	4e-10	17	577	57	FALSE	FALSE	9.60813792249263e-13	9.60813792249263e-13	74518683	rs7928160
chr11_74543826_G_T	Cluster_6384_funcExplorer_integrated	chr11_74519366_C_T	chr11_74523639_TA_T	Cluster_6384_funcExplorer_integrated_CL_0002057_LPS_24h_chr11_74523639_TA_T_cs_1	876	0.0126147664974536	-5.59608805603756	1	Cluster_6384	funcExplorer	integrated	CL_0002057_LPS_24h	chr11	1.16247392788859e-08	0.0028171089000366	0.0595731239350844	4e-10	17	577	57	FALSE	FALSE	9.60813792249263e-13	9.60813792249263e-13	74519366	rs1655475
chr11_74543826_G_T	Cluster_6384_funcExplorer_integrated	chr11_74521429_CAA_C	chr11_74523639_TA_T	Cluster_6384_funcExplorer_integrated_CL_0002057_LPS_24h_chr11_74523639_TA_T_cs_1	877	0.0126147664974536	-5.59608805603756	1	Cluster_6384	funcExplorer	integrated	CL_0002057_LPS_24h	chr11	1.16247392788859e-08	0.0028171089000366	0.0595731239350844	4e-10	17	577	57	FALSE	FALSE	9.60813792249263e-13	9.60813792249263e-13	74521429	rs56241926
chr11_74543826_G_T	Cluster_6384_funcExplorer_integrated	chr11_74521986_G_A	chr11_74523639_TA_T	Cluster_6384_funcExplorer_integrated_CL_0002057_LPS_24h_chr11_74523639_TA_T_cs_1	878	0.0126147664974536	-5.59608805603756	1	Cluster_6384	funcExplorer	integrated	CL_0002057_LPS_24h	chr11	1.16247392788859e-08	0.0028171089000366	0.0595731239350844	4e-10	17	577	57	FALSE	FALSE	9.60813792249263e-13	9.60813792249263e-13	74521986
chr11_74543826_G_T	Cluster_6384_funcExplorer_integrated	chr11_74522056_T_C	chr11_74523639_TA_T	Cluster_6384_funcExplorer_integrated_CL_0002057_LPS_24h_chr11_74523639_TA_T_cs_1	879	0.014896931137133	-5.65149817808102	1	Cluster_6384	funcExplorer	integrated	CL_0002057_LPS_24h	chr11	1.16247392788859e-08	0.0028171089000366	0.0595731239350844	4e-10	17	577	57	FALSE	FALSE	9.60813792249263e-13	9.60813792249263e-13	74522056	rs666125
chr11_74543826_G_T	Cluster_6384_funcExplorer_integrated	chr11_74523391_C_G	chr11_74523639_TA_T	Cluster_6384_funcExplorer_integrated_CL_0002057_LPS_24h_chr11_74523639_TA_T_cs_1	881	0.0126147664974536	-5.59608805603756	1	Cluster_6384	funcExplorer	integrated	CL_0002057_LPS_24h	chr11	1.16247392788859e-08	0.0028171089000366	0.0595731239350844	4e-10	17	577	57	FALSE	FALSE	9.60813792249263e-13	9.60813792249263e-13	74523391
chr11_74543826_G_T	Cluster_6384_funcExplorer_integrated	chr11_74523421_G_GA	chr11_74523639_TA_T	Cluster_6384_funcExplorer_integrated_CL_0002057_LPS_24h_chr11_74523639_TA_T_cs_1	882	0.0192084036547949	-5.78105512719172	1	Cluster_6384	funcExplorer	integrated	CL_0002057_LPS_24h	chr11	1.16247392788859e-08	0.0028171089000366	0.0595731239350844	4e-10	17	577	57	FALSE	FALSE	9.60813792249263e-13	9.60813792249263e-13	74523421
chr11_74543826_G_T	Cluster_6384_funcExplorer_integrated	chr11_74523639_TA_T	chr11_74523639_TA_T	Cluster_6384_funcExplorer_integrated_CL_0002057_LPS_24h_chr11_74523639_TA_T_cs_1	883	0.0283828739307039	-5.82452911570221	1	Cluster_6384	funcExplorer	integrated	CL_0002057_LPS_24h	chr11	1.16247392788859e-08	0.0028171089000366	0.0595731239350844	4e-10	17	577	57	FALSE	FALSE	9.60813792249263e-13	9.60813792249263e-13	74523639	rs34619402; rs796577053
chr11_74543826_G_T	Cluster_6384_funcExplorer_integrated	chr11_74523991_C_A	chr11_74523639_TA_T	Cluster_6384_funcExplorer_integrated_CL_0002057_LPS_24h_chr11_74523639_TA_T_cs_1	884	0.0126147664974536	-5.59608805603756	1	Cluster_6384	funcExplorer	integrated	CL_0002057_LPS_24h	chr11	1.16247392788859e-08	0.0028171089000366	0.0595731239350844	4e-10	17	577	57	FALSE	FALSE	9.60813792249263e-13	9.60813792249263e-13	74523991	rs1787109
chr11_74543826_G_T	Cluster_6384_funcExplorer_integrated	chr11_74524446_G_A	chr11_74523639_TA_T	Cluster_6384_funcExplorer_integrated_CL_0002057_LPS_24h_chr11_74523639_TA_T_cs_1	887	0.0126147664974536	-5.59608805603756	1	Cluster_6384	funcExplorer	integrated	CL_0002057_LPS_24h	chr11	1.16247392788859e-08	0.0028171089000366	0.0595731239350844	4e-10	17	577	57	FALSE	FALSE	9.60813792249263e-13	9.60813792249263e-13	74524446	rs1433968
chr11_74543826_G_T	Cluster_6384_funcExplorer_integrated	chr11_74524817_T_C	chr11_74523639_TA_T	Cluster_6384_funcExplorer_integrated_CL_0002057_LPS_24h_chr11_74523639_TA_T_cs_1	888	0.0126147664974536	-5.59608805603756	1	Cluster_6384	funcExplorer	integrated	CL_0002057_LPS_24h	chr11	1.16247392788859e-08	0.0028171089000366	0.0595731239350844	4e-10	17	577	57	FALSE	FALSE	9.60813792249263e-13	9.60813792249263e-13	74524817	rs594143
chr11_74543826_G_T	Cluster_6384_funcExplorer_integrated	chr11_74525096_A_G	chr11_74523639_TA_T	Cluster_6384_funcExplorer_integrated_CL_0002057_LPS_24h_chr11_74523639_TA_T_cs_1	890	0.0126147664974536	-5.59608805603756	1	Cluster_6384	funcExplorer	integrated	CL_0002057_LPS_24h	chr11	1.16247392788859e-08	0.0028171089000366	0.0595731239350844	4e-10	17	577	57	FALSE	FALSE	9.60813792249263e-13	9.60813792249263e-13	74525096
chr11_74543826_G_T	Cluster_6384_funcExplorer_integrated	chr11_74525110_TG_T	chr11_74523639_TA_T	Cluster_6384_funcExplorer_integrated_CL_0002057_LPS_24h_chr11_74523639_TA_T_cs_1	891	0.0126147664974536	-5.59608805603756	1	Cluster_6384	funcExplorer	integrated	CL_0002057_LPS_24h	chr11	1.16247392788859e-08	0.0028171089000366	0.0595731239350844	4e-10	17	577	57	FALSE	FALSE	9.60813792249263e-13	9.60813792249263e-13	74525110	rs56010330
chr11_74543826_G_T	Cluster_6384_funcExplorer_integrated	chr11_74525696_A_G	chr11_74523639_TA_T	Cluster_6384_funcExplorer_integrated_CL_0002057_LPS_24h_chr11_74523639_TA_T_cs_1	895	0.0126147664974536	-5.59608805603756	1	Cluster_6384	funcExplorer	integrated	CL_0002057_LPS_24h	chr11	1.16247392788859e-08	0.0028171089000366	0.0595731239350844	4e-10	17	577	57	FALSE	FALSE	9.60813792249263e-13	9.60813792249263e-13	74525696
chr11_74543826_G_T	Cluster_6384_funcExplorer_integrated	chr11_74525837_GCCTAGC_G	chr11_74523639_TA_T	Cluster_6384_funcExplorer_integrated_CL_0002057_LPS_24h_chr11_74523639_TA_T_cs_1	896	0.0126147664974536	-5.59608805603756	1	Cluster_6384	funcExplorer	integrated	CL_0002057_LPS_24h	chr11	1.16247392788859e-08	0.0028171089000366	0.0595731239350844	4e-10	17	577	57	FALSE	FALSE	9.60813792249263e-13	9.60813792249263e-13	74525837	rs143042351; rs370929316
chr11_74543826_G_T	Cluster_6384_funcExplorer_integrated	chr11_74526268_C_T	chr11_74523639_TA_T	Cluster_6384_funcExplorer_integrated_CL_0002057_LPS_24h_chr11_74523639_TA_T_cs_1	897	0.0129941442145104	-5.61832377739469	1	Cluster_6384	funcExplorer	integrated	CL_0002057_LPS_24h	chr11	1.16247392788859e-08	0.0028171089000366	0.0595731239350844	4e-10	17	577	57	FALSE	FALSE	9.60813792249263e-13	9.60813792249263e-13	74526268
chr11_74543826_G_T	Cluster_6384_funcExplorer_integrated	chr11_74527359_G_T	chr11_74523639_TA_T	Cluster_6384_funcExplorer_integrated_CL_0002057_LPS_24h_chr11_74523639_TA_T_cs_1	902	0.0126147664974536	-5.59608805603756	1	Cluster_6384	funcExplorer	integrated	CL_0002057_LPS_24h	chr11	1.16247392788859e-08	0.0028171089000366	0.0595731239350844	4e-10	17	577	57	FALSE	FALSE	9.60813792249263e-13	9.60813792249263e-13	74527359	rs10793090
chr11_74543826_G_T	Cluster_6384_funcExplorer_integrated	chr11_74528424_T_C	chr11_74523639_TA_T	Cluster_6384_funcExplorer_integrated_CL_0002057_LPS_24h_chr11_74523639_TA_T_cs_1	907	0.0129941442145104	-5.61832377739469	1	Cluster_6384	funcExplorer	integrated	CL_0002057_LPS_24h	chr11	1.16247392788859e-08	0.0028171089000366	0.0595731239350844	4e-10	17	577	57	FALSE	FALSE	9.60813792249263e-13	9.60813792249263e-13	74528424	rs11532106
chr11_74543826_G_T	Cluster_6384_funcExplorer_integrated	chr11_74529675_A_AT	chr11_74523639_TA_T	Cluster_6384_funcExplorer_integrated_CL_0002057_LPS_24h_chr11_74523639_TA_T_cs_1	912	0.0126147664974536	5.59608805603756	1	Cluster_6384	funcExplorer	integrated	CL_0002057_LPS_24h	chr11	1.16247392788859e-08	0.0028171089000366	0.0595731239350844	4e-10	17	577	57	FALSE	FALSE	9.60813792249263e-13	9.60813792249263e-13	74529675	rs397946034
chr11_74543826_G_T	Cluster_6384_funcExplorer_integrated	chr11_74529927_CT_C	chr11_74523639_TA_T	Cluster_6384_funcExplorer_integrated_CL_0002057_LPS_24h_chr11_74523639_TA_T_cs_1	913	0.0302133423265105	5.82845485868717	1	Cluster_6384	funcExplorer	integrated	CL_0002057_LPS_24h	chr11	1.16247392788859e-08	0.0028171089000366	0.0595731239350844	4e-10	17	577	57	FALSE	FALSE	9.60813792249263e-13	9.60813792249263e-13	74529927	rs34369791
chr11_74543826_G_T	Cluster_6384_funcExplorer_integrated	chr11_74530465_A_T	chr11_74523639_TA_T	Cluster_6384_funcExplorer_integrated_CL_0002057_LPS_24h_chr11_74523639_TA_T_cs_1	914	0.0129941442145104	5.61832377739469	1	Cluster_6384	funcExplorer	integrated	CL_0002057_LPS_24h	chr11	1.16247392788859e-08	0.0028171089000366	0.0595731239350844	4e-10	17	577	57	FALSE	FALSE	9.60813792249263e-13	9.60813792249263e-13	74530465	rs598525
chr11_74543826_G_T	Cluster_6384_funcExplorer_integrated	chr11_74530533_C_T	chr11_74523639_TA_T	Cluster_6384_funcExplorer_integrated_CL_0002057_LPS_24h_chr11_74523639_TA_T_cs_1	915	0.0126147664974536	5.59608805603756	1	Cluster_6384	funcExplorer	integrated	CL_0002057_LPS_24h	chr11	1.16247392788859e-08	0.0028171089000366	0.0595731239350844	4e-10	17	577	57	FALSE	FALSE	9.60813792249263e-13	9.60813792249263e-13	74530533	rs598926
chr11_74543826_G_T	Cluster_6384_funcExplorer_integrated	chr11_74530696_A_G	chr11_74523639_TA_T	Cluster_6384_funcExplorer_integrated_CL_0002057_LPS_24h_chr11_74523639_TA_T_cs_1	916	0.0126147664974536	5.59608805603756	1	Cluster_6384	funcExplorer	integrated	CL_0002057_LPS_24h	chr11	1.16247392788859e-08	0.0028171089000366	0.0595731239350844	4e-10	17	577	57	FALSE	FALSE	9.60813792249263e-13	9.60813792249263e-13	74530696
chr11_74543826_G_T	Cluster_6384_funcExplorer_integrated	chr11_74530790_A_G	chr11_74523639_TA_T	Cluster_6384_funcExplorer_integrated_CL_0002057_LPS_24h_chr11_74523639_TA_T_cs_1	918	0.0129941442145104	5.61832377739469	1	Cluster_6384	funcExplorer	integrated	CL_0002057_LPS_24h	chr11	1.16247392788859e-08	0.0028171089000366	0.0595731239350844	4e-10	17	577	57	FALSE	FALSE	9.60813792249263e-13	9.60813792249263e-13	74530790
chr11_74543826_G_T	Cluster_6384_funcExplorer_integrated	chr11_74531140_A_G	chr11_74523639_TA_T	Cluster_6384_funcExplorer_integrated_CL_0002057_LPS_24h_chr11_74523639_TA_T_cs_1	920	0.0126147664974536	5.59608805603756	1	Cluster_6384	funcExplorer	integrated	CL_0002057_LPS_24h	chr11	1.16247392788859e-08	0.0028171089000366	0.0595731239350844	4e-10	17	577	57	FALSE	FALSE	9.60813792249263e-13	9.60813792249263e-13	74531140
chr11_74543826_G_T	Cluster_6384_funcExplorer_integrated	chr11_74531266_C_T	chr11_74523639_TA_T	Cluster_6384_funcExplorer_integrated_CL_0002057_LPS_24h_chr11_74523639_TA_T_cs_1	921	0.0126147664974536	5.59608805603756	1	Cluster_6384	funcExplorer	integrated	CL_0002057_LPS_24h	chr11	1.16247392788859e-08	0.0028171089000366	0.0595731239350844	4e-10	17	577	57	FALSE	FALSE	9.60813792249263e-13	9.60813792249263e-13	74531266	rs2570616
chr11_74543826_G_T	Cluster_6384_funcExplorer_integrated	chr11_74531300_G_A	chr11_74523639_TA_T	Cluster_6384_funcExplorer_integrated_CL_0002057_LPS_24h_chr11_74523639_TA_T_cs_1	922	0.0126147664974536	5.59608805603756	1	Cluster_6384	funcExplorer	integrated	CL_0002057_LPS_24h	chr11	1.16247392788859e-08	0.0028171089000366	0.0595731239350844	4e-10	17	577	57	FALSE	FALSE	9.60813792249263e-13	9.60813792249263e-13	74531300
chr11_74543826_G_T	Cluster_6384_funcExplorer_integrated	chr11_74531418_C_T	chr11_74523639_TA_T	Cluster_6384_funcExplorer_integrated_CL_0002057_LPS_24h_chr11_74523639_TA_T_cs_1	924	0.0126147664974536	5.59608805603756	1	Cluster_6384	funcExplorer	integrated	CL_0002057_LPS_24h	chr11	1.16247392788859e-08	0.0028171089000366	0.0595731239350844	4e-10	17	577	57	FALSE	FALSE	9.60813792249263e-13	9.60813792249263e-13	74531418
chr11_74543826_G_T	Cluster_6384_funcExplorer_integrated	chr11_74531688_C_T	chr11_74523639_TA_T	Cluster_6384_funcExplorer_integrated_CL_0002057_LPS_24h_chr11_74523639_TA_T_cs_1	925	0.0126147664974536	5.59608805603756	1	Cluster_6384	funcExplorer	integrated	CL_0002057_LPS_24h	chr11	1.16247392788859e-08	0.0028171089000366	0.0595731239350844	4e-10	17	577	57	FALSE	FALSE	9.60813792249263e-13	9.60813792249263e-13	74531688	rs1783197
chr11_74543826_G_T	Cluster_6384_funcExplorer_integrated	chr11_74531798_G_GTCTTTT	chr11_74523639_TA_T	Cluster_6384_funcExplorer_integrated_CL_0002057_LPS_24h_chr11_74523639_TA_T_cs_1	926	0.0126147664974536	5.59608805603756	1	Cluster_6384	funcExplorer	integrated	CL_0002057_LPS_24h	chr11	1.16247392788859e-08	0.0028171089000366	0.0595731239350844	4e-10	17	577	57	FALSE	FALSE	9.60813792249263e-13	9.60813792249263e-13	74531798	rs113030291
chr11_74543826_G_T	Cluster_6384_funcExplorer_integrated	chr11_74532069_G_C	chr11_74523639_TA_T	Cluster_6384_funcExplorer_integrated_CL_0002057_LPS_24h_chr11_74523639_TA_T_cs_1	927	0.0126147664974536	5.59608805603756	1	Cluster_6384	funcExplorer	integrated	CL_0002057_LPS_24h	chr11	1.16247392788859e-08	0.0028171089000366	0.0595731239350844	4e-10	17	577	57	FALSE	FALSE	9.60813792249263e-13	9.60813792249263e-13	74532069	rs642932
chr11_74543826_G_T	Cluster_6384_funcExplorer_integrated	chr11_74532142_T_G	chr11_74523639_TA_T	Cluster_6384_funcExplorer_integrated_CL_0002057_LPS_24h_chr11_74523639_TA_T_cs_1	928	0.0126147664974536	5.59608805603756	1	Cluster_6384	funcExplorer	integrated	CL_0002057_LPS_24h	chr11	1.16247392788859e-08	0.0028171089000366	0.0595731239350844	4e-10	17	577	57	FALSE	FALSE	9.60813792249263e-13	9.60813792249263e-13	74532142	rs1791491
chr11_74543826_G_T	Cluster_6384_funcExplorer_integrated	chr11_74532184_T_C	chr11_74523639_TA_T	Cluster_6384_funcExplorer_integrated_CL_0002057_LPS_24h_chr11_74523639_TA_T_cs_1	929	0.0126147664974536	5.59608805603756	1	Cluster_6384	funcExplorer	integrated	CL_0002057_LPS_24h	chr11	1.16247392788859e-08	0.0028171089000366	0.0595731239350844	4e-10	17	577	57	FALSE	FALSE	9.60813792249263e-13	9.60813792249263e-13	74532184
chr11_74543826_G_T	Cluster_6384_funcExplorer_integrated	chr11_74532345_T_C	chr11_74523639_TA_T	Cluster_6384_funcExplorer_integrated_CL_0002057_LPS_24h_chr11_74523639_TA_T_cs_1	931	0.0126147664974536	5.59608805603756	1	Cluster_6384	funcExplorer	integrated	CL_0002057_LPS_24h	chr11	1.16247392788859e-08	0.0028171089000366	0.0595731239350844	4e-10	17	577	57	FALSE	FALSE	9.60813792249263e-13	9.60813792249263e-13	74532345	rs661781
chr11_74543826_G_T	Cluster_6384_funcExplorer_integrated	chr11_74533603_C_T	chr11_74523639_TA_T	Cluster_6384_funcExplorer_integrated_CL_0002057_LPS_24h_chr11_74523639_TA_T_cs_1	932	0.0130261497013605	5.59723559211015	1	Cluster_6384	funcExplorer	integrated	CL_0002057_LPS_24h	chr11	1.16247392788859e-08	0.0028171089000366	0.0595731239350844	4e-10	17	577	57	FALSE	FALSE	9.60813792249263e-13	9.60813792249263e-13	74533603	rs645655
chr11_74543826_G_T	Cluster_6384_funcExplorer_integrated	chr11_74533604_A_G	chr11_74523639_TA_T	Cluster_6384_funcExplorer_integrated_CL_0002057_LPS_24h_chr11_74523639_TA_T_cs_1	933	0.0130261497013605	5.59723559211015	1	Cluster_6384	funcExplorer	integrated	CL_0002057_LPS_24h	chr11	1.16247392788859e-08	0.0028171089000366	0.0595731239350844	4e-10	17	577	57	FALSE	FALSE	9.60813792249263e-13	9.60813792249263e-13	74533604	rs660057
chr11_74543826_G_T	Cluster_6384_funcExplorer_integrated	chr11_74533643_A_G	chr11_74523639_TA_T	Cluster_6384_funcExplorer_integrated_CL_0002057_LPS_24h_chr11_74523639_TA_T_cs_1	934	0.0130261497013605	5.59723559211015	1	Cluster_6384	funcExplorer	integrated	CL_0002057_LPS_24h	chr11	1.16247392788859e-08	0.0028171089000366	0.0595731239350844	4e-10	17	577	57	FALSE	FALSE	9.60813792249263e-13	9.60813792249263e-13	74533643	rs660107
chr11_74543826_G_T	Cluster_6384_funcExplorer_integrated	chr11_74533655_C_T	chr11_74523639_TA_T	Cluster_6384_funcExplorer_integrated_CL_0002057_LPS_24h_chr11_74523639_TA_T_cs_1	935	0.0133724650864739	5.61810473282977	1	Cluster_6384	funcExplorer	integrated	CL_0002057_LPS_24h	chr11	1.16247392788859e-08	0.0028171089000366	0.0595731239350844	4e-10	17	577	57	FALSE	FALSE	9.60813792249263e-13	9.60813792249263e-13	74533655	rs660123
chr11_74543826_G_T	Cluster_6384_funcExplorer_integrated	chr11_74533784_A_G	chr11_74523639_TA_T	Cluster_6384_funcExplorer_integrated_CL_0002057_LPS_24h_chr11_74523639_TA_T_cs_1	936	0.0130261497013605	5.59723559211015	1	Cluster_6384	funcExplorer	integrated	CL_0002057_LPS_24h	chr11	1.16247392788859e-08	0.0028171089000366	0.0595731239350844	4e-10	17	577	57	FALSE	FALSE	9.60813792249263e-13	9.60813792249263e-13	74533784
chr11_74543826_G_T	Cluster_6384_funcExplorer_integrated	chr11_74533831_G_A	chr11_74523639_TA_T	Cluster_6384_funcExplorer_integrated_CL_0002057_LPS_24h_chr11_74523639_TA_T_cs_1	937	0.0129941442145104	5.61832377739469	1	Cluster_6384	funcExplorer	integrated	CL_0002057_LPS_24h	chr11	1.16247392788859e-08	0.0028171089000366	0.0595731239350844	4e-10	17	577	57	FALSE	FALSE	9.60813792249263e-13	9.60813792249263e-13	74533831	rs3017113
chr11_74543826_G_T	Cluster_6384_funcExplorer_integrated	chr11_74533894_A_G	chr11_74523639_TA_T	Cluster_6384_funcExplorer_integrated_CL_0002057_LPS_24h_chr11_74523639_TA_T_cs_1	939	0.0126147664974536	5.59608805603756	1	Cluster_6384	funcExplorer	integrated	CL_0002057_LPS_24h	chr11	1.16247392788859e-08	0.0028171089000366	0.0595731239350844	4e-10	17	577	57	FALSE	FALSE	9.60813792249263e-13	9.60813792249263e-13	74533894	rs2916310
chr11_74543826_G_T	Cluster_6384_funcExplorer_integrated	chr11_74534115_A_C	chr11_74523639_TA_T	Cluster_6384_funcExplorer_integrated_CL_0002057_LPS_24h_chr11_74523639_TA_T_cs_1	940	0.0126147664974536	5.59608805603756	1	Cluster_6384	funcExplorer	integrated	CL_0002057_LPS_24h	chr11	1.16247392788859e-08	0.0028171089000366	0.0595731239350844	4e-10	17	577	57	FALSE	FALSE	9.60813792249263e-13	9.60813792249263e-13	74534115
chr11_74543826_G_T	Cluster_6384_funcExplorer_integrated	chr11_74534438_C_T	chr11_74523639_TA_T	Cluster_6384_funcExplorer_integrated_CL_0002057_LPS_24h_chr11_74523639_TA_T_cs_1	943	0.0126147664974536	5.59608805603756	1	Cluster_6384	funcExplorer	integrated	CL_0002057_LPS_24h	chr11	1.16247392788859e-08	0.0028171089000366	0.0595731239350844	4e-10	17	577	57	FALSE	FALSE	9.60813792249263e-13	9.60813792249263e-13	74534438
chr11_74543826_G_T	Cluster_6384_funcExplorer_integrated	chr11_74534628_A_G	chr11_74523639_TA_T	Cluster_6384_funcExplorer_integrated_CL_0002057_LPS_24h_chr11_74523639_TA_T_cs_1	944	0.0129941442145104	5.61832377739469	1	Cluster_6384	funcExplorer	integrated	CL_0002057_LPS_24h	chr11	1.16247392788859e-08	0.0028171089000366	0.0595731239350844	4e-10	17	577	57	FALSE	FALSE	9.60813792249263e-13	9.60813792249263e-13	74534628
chr11_74543826_G_T	Cluster_6384_funcExplorer_integrated	chr11_74534999_A_G	chr11_74523639_TA_T	Cluster_6384_funcExplorer_integrated_CL_0002057_LPS_24h_chr11_74523639_TA_T_cs_1	945	0.0126147664974536	5.59608805603756	1	Cluster_6384	funcExplorer	integrated	CL_0002057_LPS_24h	chr11	1.16247392788859e-08	0.0028171089000366	0.0595731239350844	4e-10	17	577	57	FALSE	FALSE	9.60813792249263e-13	9.60813792249263e-13	74534999	rs602500
chr11_74543826_G_T	Cluster_6384_funcExplorer_integrated	chr11_74535868_G_A	chr11_74523639_TA_T	Cluster_6384_funcExplorer_integrated_CL_0002057_LPS_24h_chr11_74523639_TA_T_cs_1	946	0.0129941442145104	5.61832377739469	1	Cluster_6384	funcExplorer	integrated	CL_0002057_LPS_24h	chr11	1.16247392788859e-08	0.0028171089000366	0.0595731239350844	4e-10	17	577	57	FALSE	FALSE	9.60813792249263e-13	9.60813792249263e-13	74535868	rs598821
chr11_74543826_G_T	Cluster_6384_funcExplorer_integrated	chr11_74535964_G_C	chr11_74523639_TA_T	Cluster_6384_funcExplorer_integrated_CL_0002057_LPS_24h_chr11_74523639_TA_T_cs_1	947	0.0126147664974536	5.59608805603756	1	Cluster_6384	funcExplorer	integrated	CL_0002057_LPS_24h	chr11	1.16247392788859e-08	0.0028171089000366	0.0595731239350844	4e-10	17	577	57	FALSE	FALSE	9.60813792249263e-13	9.60813792249263e-13	74535964
chr11_74543826_G_T	Cluster_6384_funcExplorer_integrated	chr11_74536349_G_A	chr11_74523639_TA_T	Cluster_6384_funcExplorer_integrated_CL_0002057_LPS_24h_chr11_74523639_TA_T_cs_1	948	0.0126147664974536	5.59608805603756	1	Cluster_6384	funcExplorer	integrated	CL_0002057_LPS_24h	chr11	1.16247392788859e-08	0.0028171089000366	0.0595731239350844	4e-10	17	577	57	FALSE	FALSE	9.60813792249263e-13	9.60813792249263e-13	74536349	rs694606
chr11_74543826_G_T	Cluster_6384_funcExplorer_integrated	chr11_74537348_T_G	chr11_74523639_TA_T	Cluster_6384_funcExplorer_integrated_CL_0002057_LPS_24h_chr11_74523639_TA_T_cs_1	949	0.0126147664974536	5.59608805603756	1	Cluster_6384	funcExplorer	integrated	CL_0002057_LPS_24h	chr11	1.16247392788859e-08	0.0028171089000366	0.0595731239350844	4e-10	17	577	57	FALSE	FALSE	9.60813792249263e-13	9.60813792249263e-13	74537348	rs1316181
chr11_74543826_G_T	Cluster_6384_funcExplorer_integrated	chr11_74537361_CTTGT_C	chr11_74523639_TA_T	Cluster_6384_funcExplorer_integrated_CL_0002057_LPS_24h_chr11_74523639_TA_T_cs_1	950	0.0126147664974536	5.59608805603756	1	Cluster_6384	funcExplorer	integrated	CL_0002057_LPS_24h	chr11	1.16247392788859e-08	0.0028171089000366	0.0595731239350844	4e-10	17	577	57	FALSE	FALSE	9.60813792249263e-13	9.60813792249263e-13	74537361	rs111858152; rs142706736; rs71471311; rs370982033
chr11_74543826_G_T	Cluster_6384_funcExplorer_integrated	chr11_74537711_A_G	chr11_74523639_TA_T	Cluster_6384_funcExplorer_integrated_CL_0002057_LPS_24h_chr11_74523639_TA_T_cs_1	952	0.0126147664974536	5.59608805603756	1	Cluster_6384	funcExplorer	integrated	CL_0002057_LPS_24h	chr11	1.16247392788859e-08	0.0028171089000366	0.0595731239350844	4e-10	17	577	57	FALSE	FALSE	9.60813792249263e-13	9.60813792249263e-13	74537711
chr11_74543826_G_T	Cluster_6384_funcExplorer_integrated	chr11_74537896_C_T	chr11_74523639_TA_T	Cluster_6384_funcExplorer_integrated_CL_0002057_LPS_24h_chr11_74523639_TA_T_cs_1	953	0.0126147664974536	5.59608805603756	1	Cluster_6384	funcExplorer	integrated	CL_0002057_LPS_24h	chr11	1.16247392788859e-08	0.0028171089000366	0.0595731239350844	4e-10	17	577	57	FALSE	FALSE	9.60813792249263e-13	9.60813792249263e-13	74537896	rs1316182
chr11_74543826_G_T	Cluster_6384_funcExplorer_integrated	chr11_74538045_G_T	chr11_74523639_TA_T	Cluster_6384_funcExplorer_integrated_CL_0002057_LPS_24h_chr11_74523639_TA_T_cs_1	954	0.0126147664974536	5.59608805603756	1	Cluster_6384	funcExplorer	integrated	CL_0002057_LPS_24h	chr11	1.16247392788859e-08	0.0028171089000366	0.0595731239350844	4e-10	17	577	57	FALSE	FALSE	9.60813792249263e-13	9.60813792249263e-13	74538045	rs1315212
chr11_74543826_G_T	Cluster_6384_funcExplorer_integrated	chr11_74538154_G_A	chr11_74523639_TA_T	Cluster_6384_funcExplorer_integrated_CL_0002057_LPS_24h_chr11_74523639_TA_T_cs_1	955	0.0126147664974536	5.59608805603756	1	Cluster_6384	funcExplorer	integrated	CL_0002057_LPS_24h	chr11	1.16247392788859e-08	0.0028171089000366	0.0595731239350844	4e-10	17	577	57	FALSE	FALSE	9.60813792249263e-13	9.60813792249263e-13	74538154	rs1315213
chr11_74543826_G_T	Cluster_6384_funcExplorer_integrated	chr11_74538312_CT_C	chr11_74523639_TA_T	Cluster_6384_funcExplorer_integrated_CL_0002057_LPS_24h_chr11_74523639_TA_T_cs_1	956	0.0126147664974536	5.59608805603756	1	Cluster_6384	funcExplorer	integrated	CL_0002057_LPS_24h	chr11	1.16247392788859e-08	0.0028171089000366	0.0595731239350844	4e-10	17	577	57	FALSE	FALSE	9.60813792249263e-13	9.60813792249263e-13	74538312	rs35068835; rs796903118
chr11_74543826_G_T	Cluster_6384_funcExplorer_integrated	chr11_74539299_T_C	chr11_74523639_TA_T	Cluster_6384_funcExplorer_integrated_CL_0002057_LPS_24h_chr11_74523639_TA_T_cs_1	960	0.0126147664974536	5.59608805603756	1	Cluster_6384	funcExplorer	integrated	CL_0002057_LPS_24h	chr11	1.16247392788859e-08	0.0028171089000366	0.0595731239350844	4e-10	17	577	57	FALSE	FALSE	9.60813792249263e-13	9.60813792249263e-13	74539299	rs1315214
chr11_74543826_G_T	Cluster_6384_funcExplorer_integrated	chr11_74539604_T_C	chr11_74523639_TA_T	Cluster_6384_funcExplorer_integrated_CL_0002057_LPS_24h_chr11_74523639_TA_T_cs_1	961	0.0126147664974536	5.59608805603756	1	Cluster_6384	funcExplorer	integrated	CL_0002057_LPS_24h	chr11	1.16247392788859e-08	0.0028171089000366	0.0595731239350844	4e-10	17	577	57	FALSE	FALSE	9.60813792249263e-13	9.60813792249263e-13	74539604	rs648677
chr11_74543826_G_T	Cluster_6384_funcExplorer_integrated	chr11_74539942_C_T	chr11_74523639_TA_T	Cluster_6384_funcExplorer_integrated_CL_0002057_LPS_24h_chr11_74523639_TA_T_cs_1	963	0.0129941442145104	5.61832377739469	1	Cluster_6384	funcExplorer	integrated	CL_0002057_LPS_24h	chr11	1.16247392788859e-08	0.0028171089000366	0.0595731239350844	4e-10	17	577	57	FALSE	FALSE	9.60813792249263e-13	9.60813792249263e-13	74539942	rs659581
chr11_74543826_G_T	Cluster_6384_funcExplorer_integrated	chr11_74540067_T_G	chr11_74523639_TA_T	Cluster_6384_funcExplorer_integrated_CL_0002057_LPS_24h_chr11_74523639_TA_T_cs_1	964	0.0126147664974536	5.59608805603756	1	Cluster_6384	funcExplorer	integrated	CL_0002057_LPS_24h	chr11	1.16247392788859e-08	0.0028171089000366	0.0595731239350844	4e-10	17	577	57	FALSE	FALSE	9.60813792249263e-13	9.60813792249263e-13	74540067	rs660855
chr11_74543826_G_T	Cluster_6384_funcExplorer_integrated	chr11_74540112_A_G	chr11_74523639_TA_T	Cluster_6384_funcExplorer_integrated_CL_0002057_LPS_24h_chr11_74523639_TA_T_cs_1	965	0.0126147664974536	5.59608805603756	1	Cluster_6384	funcExplorer	integrated	CL_0002057_LPS_24h	chr11	1.16247392788859e-08	0.0028171089000366	0.0595731239350844	4e-10	17	577	57	FALSE	FALSE	9.60813792249263e-13	9.60813792249263e-13	74540112	rs1315218
chr11_74543826_G_T	Cluster_6384_funcExplorer_integrated	chr11_74540504_T_A	chr11_74523639_TA_T	Cluster_6384_funcExplorer_integrated_CL_0002057_LPS_24h_chr11_74523639_TA_T_cs_1	966	0.0126147664974536	5.59608805603756	1	Cluster_6384	funcExplorer	integrated	CL_0002057_LPS_24h	chr11	1.16247392788859e-08	0.0028171089000366	0.0595731239350844	4e-10	17	577	57	FALSE	FALSE	9.60813792249263e-13	9.60813792249263e-13	74540504	rs663016
chr11_74543826_G_T	Cluster_6384_funcExplorer_integrated	chr11_74540647_T_C	chr11_74523639_TA_T	Cluster_6384_funcExplorer_integrated_CL_0002057_LPS_24h_chr11_74523639_TA_T_cs_1	967	0.0126147664974536	5.59608805603756	1	Cluster_6384	funcExplorer	integrated	CL_0002057_LPS_24h	chr11	1.16247392788859e-08	0.0028171089000366	0.0595731239350844	4e-10	17	577	57	FALSE	FALSE	9.60813792249263e-13	9.60813792249263e-13	74540647	rs663499
chr11_74543826_G_T	Cluster_6384_funcExplorer_integrated	chr11_74540686_T_C	chr11_74523639_TA_T	Cluster_6384_funcExplorer_integrated_CL_0002057_LPS_24h_chr11_74523639_TA_T_cs_1	969	0.0126147664974536	5.59608805603756	1	Cluster_6384	funcExplorer	integrated	CL_0002057_LPS_24h	chr11	1.16247392788859e-08	0.0028171089000366	0.0595731239350844	4e-10	17	577	57	FALSE	FALSE	9.60813792249263e-13	9.60813792249263e-13	74540686	rs663555
chr11_74543826_G_T	Cluster_6384_funcExplorer_integrated	chr11_74540783_C_A	chr11_74523639_TA_T	Cluster_6384_funcExplorer_integrated_CL_0002057_LPS_24h_chr11_74523639_TA_T_cs_1	970	0.0126147664974536	5.59608805603756	1	Cluster_6384	funcExplorer	integrated	CL_0002057_LPS_24h	chr11	1.16247392788859e-08	0.0028171089000366	0.0595731239350844	4e-10	17	577	57	FALSE	FALSE	9.60813792249263e-13	9.60813792249263e-13	74540783	rs674306
chr11_74543826_G_T	Cluster_6384_funcExplorer_integrated	chr11_74540821_T_C	chr11_74523639_TA_T	Cluster_6384_funcExplorer_integrated_CL_0002057_LPS_24h_chr11_74523639_TA_T_cs_1	971	0.0126147664974536	5.59608805603756	1	Cluster_6384	funcExplorer	integrated	CL_0002057_LPS_24h	chr11	1.16247392788859e-08	0.0028171089000366	0.0595731239350844	4e-10	17	577	57	FALSE	FALSE	9.60813792249263e-13	9.60813792249263e-13	74540821	rs674660
chr11_74543826_G_T	Cluster_6384_funcExplorer_integrated	chr11_74540971_G_A	chr11_74523639_TA_T	Cluster_6384_funcExplorer_integrated_CL_0002057_LPS_24h_chr11_74523639_TA_T_cs_1	972	0.0126147664974536	5.59608805603756	1	Cluster_6384	funcExplorer	integrated	CL_0002057_LPS_24h	chr11	1.16247392788859e-08	0.0028171089000366	0.0595731239350844	4e-10	17	577	57	FALSE	FALSE	9.60813792249263e-13	9.60813792249263e-13	74540971	rs1617788
chr11_74543826_G_T	Cluster_6384_funcExplorer_integrated	chr11_74540984_G_A	chr11_74523639_TA_T	Cluster_6384_funcExplorer_integrated_CL_0002057_LPS_24h_chr11_74523639_TA_T_cs_1	973	0.0126147664974536	5.59608805603756	1	Cluster_6384	funcExplorer	integrated	CL_0002057_LPS_24h	chr11	1.16247392788859e-08	0.0028171089000366	0.0595731239350844	4e-10	17	577	57	FALSE	FALSE	9.60813792249263e-13	9.60813792249263e-13	74540984
chr11_74543826_G_T	Cluster_6384_funcExplorer_integrated	chr11_74541026_C_T	chr11_74523639_TA_T	Cluster_6384_funcExplorer_integrated_CL_0002057_LPS_24h_chr11_74523639_TA_T_cs_1	974	0.0126147664974536	5.59608805603756	1	Cluster_6384	funcExplorer	integrated	CL_0002057_LPS_24h	chr11	1.16247392788859e-08	0.0028171089000366	0.0595731239350844	4e-10	17	577	57	FALSE	FALSE	9.60813792249263e-13	9.60813792249263e-13	74541026	rs675580
chr11_74543826_G_T	Cluster_6384_funcExplorer_integrated	chr11_74541097_C_CAGA	chr11_74523639_TA_T	Cluster_6384_funcExplorer_integrated_CL_0002057_LPS_24h_chr11_74523639_TA_T_cs_1	975	0.0126147664974536	5.59608805603756	1	Cluster_6384	funcExplorer	integrated	CL_0002057_LPS_24h	chr11	1.16247392788859e-08	0.0028171089000366	0.0595731239350844	4e-10	17	577	57	FALSE	FALSE	9.60813792249263e-13	9.60813792249263e-13	74541097	rs138123676; rs71065088
[truncated: 21,264 more rows]

## Sheet: Field_descriptions
Field	Description
meta_id	Unique identifier for lead trans-eQTL we use as represenative for the locus (of form "chromosome_position_ref_alt")
[truncated: 26 more rows]
