# Supplementary material for: Co-expression analysis reveals interpretable gene modules controlled by trans-acting genetic variants
Source: eLife. 2020 Sep 3;9:e58705. doi: 10.7554/eLife.58705 (PMC7470823; doi:10.7554/eLife.58705)
Supplement: Supplementary file 3. [file elife-58705-supp3.xlsx]

## Sheet: Supplementary_file3
meta_id	cl_id	cl_method	approach	qtl_group	cl_size	is_enriched
chr1_14348601_G_A	X15.PID_TCPTP_PATHWAY_PLIER_integrated	PLIER	integrated	CL_0002057_LPS_24h	602	TRUE
chr1_14348601_G_A	chr1_14348601_G_A gene-level trans (FDR5%) in monocyte LPS_24h	gene-level	gene-level	CL_0002057_LPS_24h	427	TRUE
chr1_14348601_G_A	chr1_14348601_G_A gene-level trans (FDR5%) in monocyte LPS_2h	gene-level	gene-level	CL_0002057_LPS_2h	2	FALSE
chr1_14348601_G_A	chr1_14348601_G_A gene-level trans (FDR5%) in CD8+ T cell naive	gene-level	gene-level	CL_0000625_naive	1	FALSE
chr1_165264420_G_A	Cluster_10282_funcExplorer_separate_CL_0000624_naive	funcExplorer	separate	CL_0000624_naive	7	TRUE
chr1_165264420_G_A	Cluster_15712_funcExplorer_separate_CL_0000624_naive	funcExplorer	separate	CL_0000624_naive	5	TRUE
chr1_165264420_G_A	chr1_165264420_G_A gene-level trans (FDR5%) in CD4+ T cell naive	gene-level	gene-level	CL_0000624_naive	627	TRUE
chr1_165264420_G_A	chr1_165264420_G_A gene-level trans (FDR5%) in CD8+ T cell naive	gene-level	gene-level	CL_0000625_naive	8	TRUE
chr1_20695138_G_A	MEdarkolivegreen_WGCNA_integrated	WGCNA	integrated	CL_0000236_naive	72	TRUE
chr1_20695138_G_A	chr1_20695138_G_A gene-level trans (FDR5%) in B cell naive	gene-level	gene-level	CL_0000236_naive	577	TRUE
chr1_225949764_A_G	Cluster_8817_funcExplorer_separate_CL_0000775_naive	funcExplorer	separate	CL_0000775_naive	26	TRUE
chr1_225949764_A_G	chr1_225949764_A_G gene-level trans (FDR5%) in neutrophil naive	gene-level	gene-level	CL_0000775_naive	100	FALSE
chr1_225949764_A_G	chr1_225949764_A_G gene-level trans (FDR5%) in monocyte LPS_24h	gene-level	gene-level	CL_0002057_LPS_24h	17	FALSE
chr1_240734551_T_A	Cluster_13921_funcExplorer_separate_CL_0002057_LPS_2h	funcExplorer	separate	CL_0002057_LPS_2h	6	TRUE
chr1_240734551_T_A	chr1_240734551_T_A gene-level trans (FDR5%) in monocyte LPS_2h	gene-level	gene-level	CL_0002057_LPS_2h	172	TRUE
chr1_240734551_T_A	chr1_240734551_T_A gene-level trans (FDR5%) in B cell naive	gene-level	gene-level	CL_0000236_naive	2	TRUE
chr1_36586360_A_G	Cluster_16995_funcExplorer_integrated	funcExplorer	integrated	CL_0000233_naive	30	TRUE
chr1_36586360_A_G	chr1_36586360_A_G gene-level trans (FDR5%) in platelet naive	gene-level	gene-level	CL_0000233_naive	1920	TRUE
chr1_36586360_A_G	chr1_36586360_A_G gene-level trans (FDR5%) in monocyte naive	gene-level	gene-level	CL_0002057_naive	3	FALSE
chr1_36586360_A_G	chr1_36586360_A_G gene-level trans (FDR5%) in CD4+ T cell naive	gene-level	gene-level	CL_0000624_naive	1	TRUE
chr1_36592753_T_C	Cluster_15755_funcExplorer_integrated	funcExplorer	integrated	CL_0000233_naive	96	TRUE
chr1_36592753_T_C	F9_PEER_integrated	PEER	integrated	CL_0000233_naive	857	TRUE
chr1_36592753_T_C	X1.NIELSEN_SCHWANNOMA_DN_PLIER_integrated	PLIER	integrated	CL_0000233_naive	890	TRUE
chr1_36592753_T_C	chr1_36592753_T_C gene-level trans (FDR5%) in platelet naive	gene-level	gene-level	CL_0000233_naive	2095	TRUE
chr1_36592753_T_C	chr1_36592753_T_C gene-level trans (FDR5%) in neutrophil naive	gene-level	gene-level	CL_0000775_naive	193	TRUE
chr1_36592753_T_C	chr1_36592753_T_C gene-level trans (FDR5%) in monocyte naive	gene-level	gene-level	CL_0002057_naive	3	FALSE
chr1_37990219_G_C	Cluster_15146_funcExplorer_integrated	funcExplorer	integrated	CL_0002057_LPS_24h	6	TRUE
chr1_37990219_G_C	Cluster_3573_funcExplorer_integrated	funcExplorer	integrated	CL_0002057_LPS_24h	15	TRUE
chr1_37990219_G_C	F3_PEER_separate_CL_0002057_LPS_24h	PEER	separate	CL_0002057_LPS_24h	1276	TRUE
chr1_37990219_G_C	Cluster_14369_funcExplorer_separate_CL_0002057_LPS_24h	funcExplorer	separate	CL_0002057_LPS_24h	18	TRUE
chr1_37990219_G_C	chr1_37990219_G_C gene-level trans (FDR5%) in monocyte LPS_24h	gene-level	gene-level	CL_0002057_LPS_24h	1506	TRUE
chr1_50554388_T_G	MEgreen_WGCNA_integrated	WGCNA	integrated	CL_0000625_naive	681	TRUE
chr1_50554388_T_G	chr1_50554388_T_G gene-level trans (FDR5%) in CD8+ T cell naive	gene-level	gene-level	CL_0000625_naive	315	TRUE
chr1_57325505_C_T	F3_PEER_integrated	PEER	integrated	CL_0000775_naive	1349	TRUE
chr1_57325505_C_T	chr1_57325505_C_T gene-level trans (FDR5%) in neutrophil naive	gene-level	gene-level	CL_0000775_naive	302	TRUE
chr1_77003531_A_G	Cluster_2643_funcExplorer_integrated	funcExplorer	integrated	CL_0000624_naive	19	TRUE
chr1_77003531_A_G	Cluster_4284_funcExplorer_separate_CL_0000624_naive	funcExplorer	separate	CL_0000624_naive	52	TRUE
chr1_77003531_A_G	MEsalmon4_WGCNA_separate_CL_0000624_naive	WGCNA	separate	CL_0000624_naive	20	TRUE
chr1_77003531_A_G	chr1_77003531_A_G gene-level trans (FDR5%) in CD4+ T cell naive	gene-level	gene-level	CL_0000624_naive	10	TRUE
chr1_77003531_A_G	chr1_77003531_A_G gene-level trans (FDR5%) in B cell naive	gene-level	gene-level	CL_0000236_naive	1	FALSE
chr1_80742792_T_C	MEplum1_WGCNA_separate_CL_0002057_LPS_2h	WGCNA	separate	CL_0002057_LPS_2h	24	FALSE
chr1_80742792_T_C	chr1_80742792_T_C gene-level trans (FDR5%) in monocyte LPS_2h	gene-level	gene-level	CL_0002057_LPS_2h	296	TRUE
chr1_80742792_T_C	chr1_80742792_T_C gene-level trans (FDR5%) in CD8+ T cell naive	gene-level	gene-level	CL_0000625_naive	2	FALSE
chr1_8216449_T_C	X48.NIKOLSKY_BREAST_CANCER_7P15_AMPLICON_PLIER_integrated	PLIER	integrated	CL_0000236_naive	670	TRUE
chr1_8216449_T_C	chr1_8216449_T_C gene-level trans (FDR5%) in B cell naive	gene-level	gene-level	CL_0000236_naive	2	FALSE
chr1_9273214_G_T	MEcyan_WGCNA_separate_CL_0000624_naive	WGCNA	separate	CL_0000624_naive	150	TRUE
chr1_9273214_G_T	chr1_9273214_G_T gene-level trans (FDR5%) in CD4+ T cell naive	gene-level	gene-level	CL_0000624_naive	1232	TRUE
chr1_9273214_G_T	chr1_9273214_G_T gene-level trans (FDR5%) in CD8+ T cell naive	gene-level	gene-level	CL_0000625_naive	40	TRUE
chr1_9273214_G_T	chr1_9273214_G_T gene-level trans (FDR5%) in platelet naive	gene-level	gene-level	CL_0000233_naive	1	FALSE
chr1_97406289_T_A	MEtan_WGCNA_integrated	WGCNA	integrated	CL_0002057_LPS_2h	268	TRUE
chr1_97406289_T_A	chr1_97406289_T_A gene-level trans (FDR5%) in monocyte LPS_2h	gene-level	gene-level	CL_0002057_LPS_2h	185	TRUE
chr10_113154982_AT_A	X35.GSE34205_RSV_VS_FLU_INF_INFANT_PBMC_UP_PLIER_integrated	PLIER	integrated	CL_0000624_naive	400	TRUE
chr10_113154982_AT_A	chr10_113154982_AT_A gene-level trans (FDR5%) in CD4+ T cell naive	gene-level	gene-level	CL_0000624_naive	168	TRUE
chr10_113154982_AT_A	chr10_113154982_AT_A gene-level trans (FDR5%) in monocyte naive	gene-level	gene-level	CL_0002057_naive	17	TRUE
chr10_114375651_G_T	X80.NIKOLSKY_BREAST_CANCER_19Q13.1_AMPLICON_PLIER_integrated	PLIER	integrated	CL_0002057_IFNg_24h	743	TRUE
chr10_114375651_G_T	chr10_114375651_G_T gene-level trans (FDR5%) in monocyte IFNg_24h	gene-level	gene-level	CL_0002057_IFNg_24h	618	TRUE
chr10_4960010_G_A	Cluster_12095_funcExplorer_separate_CL_0002057_LPS_24h	funcExplorer	separate	CL_0002057_LPS_24h	8	TRUE
chr10_4960010_G_A	chr10_4960010_G_A gene-level trans (FDR5%) in monocyte LPS_24h	gene-level	gene-level	CL_0002057_LPS_24h	403	TRUE
chr10_89980514_A_G	F4_PEER_separate_CL_0000625_naive	PEER	separate	CL_0000625_naive	1167	TRUE
chr10_89980514_A_G	chr10_89980514_A_G gene-level trans (FDR5%) in CD8+ T cell naive	gene-level	gene-level	CL_0000625_naive	251	TRUE
chr10_95253548_C_G	X27.GSE9006_TYPE_1_VS_TYPE_2_DIABETES_PBMC_AT_DX_UP_PLIER_integrated	PLIER	integrated	CL_0002057_LPS_2h	678	TRUE
chr10_95253548_C_G	F20_PEER_integrated	PEER	integrated	CL_0002057_LPS_24h	1131	TRUE
chr10_95253548_C_G	chr10_95253548_C_G gene-level trans (FDR5%) in monocyte LPS_24h	gene-level	gene-level	CL_0002057_LPS_24h	574	TRUE
chr10_95253548_C_G	chr10_95253548_C_G gene-level trans (FDR5%) in monocyte LPS_2h	gene-level	gene-level	CL_0002057_LPS_2h	265	TRUE
chr11_117272469_G_C	Cluster_5880_funcExplorer_integrated	funcExplorer	integrated	CL_0000236_naive	5	TRUE
chr11_117272469_G_C	chr11_117272469_G_C gene-level trans (FDR5%) in B cell naive	gene-level	gene-level	CL_0000236_naive	422	TRUE
chr11_117272469_G_C	chr11_117272469_G_C gene-level trans (FDR5%) in monocyte LPS_2h	gene-level	gene-level	CL_0002057_LPS_2h	1	FALSE
chr11_117272469_G_C	chr11_117272469_G_C gene-level trans (FDR5%) in monocyte IFNg_24h	gene-level	gene-level	CL_0002057_IFNg_24h	1	TRUE
chr11_19768624_A_G	Cluster_6196_funcExplorer_separate_CL_0000625_naive	funcExplorer	separate	CL_0000625_naive	11	FALSE
chr11_19768624_A_G	chr11_19768624_A_G gene-level trans (FDR5%) in CD8+ T cell naive	gene-level	gene-level	CL_0000625_naive	64	FALSE
chr11_23512699_G_A	Cluster_5930_funcExplorer_integrated	funcExplorer	integrated	CL_0002057_LPS_24h	6	TRUE
chr11_23512699_G_A	chr11_23512699_G_A gene-level trans (FDR5%) in monocyte LPS_24h	gene-level	gene-level	CL_0002057_LPS_24h	1928	TRUE
chr11_25724633_G_C	Cluster_3573_funcExplorer_integrated	funcExplorer	integrated	CL_0000236_naive	15	TRUE
chr11_25724633_G_C	chr11_25724633_G_C gene-level trans (FDR5%) in B cell naive	gene-level	gene-level	CL_0000236_naive	1219	TRUE
chr11_56352114_TTTTATTTATTTATTTATTTA_T	MEsaddlebrown_WGCNA_integrated	WGCNA	integrated	CL_0000625_naive	84	TRUE
chr11_56352114_TTTTATTTATTTATTTATTTA_T	chr11_56352114_TTTTATTTATTTATTTATTTA_T gene-level trans (FDR5%) in CD8+ T cell naive	gene-level	gene-level	CL_0000625_naive	420	TRUE
chr11_56352114_TTTTATTTATTTATTTATTTA_T	chr11_56352114_TTTTATTTATTTATTTATTTA_T gene-level trans (FDR5%) in CD4+ T cell naive	gene-level	gene-level	CL_0000624_naive	27	FALSE
chr11_56876110_C_T	MEivory_WGCNA_integrated	WGCNA	integrated	CL_0000625_naive	53	TRUE
chr11_56876110_C_T	chr11_56876110_C_T gene-level trans (FDR5%) in CD8+ T cell naive	gene-level	gene-level	CL_0000625_naive	860	TRUE
chr11_56876110_C_T	chr11_56876110_C_T gene-level trans (FDR5%) in CD4+ T cell naive	gene-level	gene-level	CL_0000624_naive	2	TRUE
chr11_62141200_G_A	Cluster_4624_funcExplorer_integrated	funcExplorer	integrated	CL_0002057_IFNg_24h	115	TRUE
chr11_62141200_G_A	chr11_62141200_G_A gene-level trans (FDR5%) in monocyte IFNg_24h	gene-level	gene-level	CL_0002057_IFNg_24h	132	FALSE
chr11_72722182_G_GGA	MEtan_WGCNA_integrated	WGCNA	integrated	CL_0000233_naive	268	TRUE
chr11_72722182_G_GGA	chr11_72722182_G_GGA gene-level trans (FDR5%) in platelet naive	gene-level	gene-level	CL_0000233_naive	223	TRUE
chr11_74543826_G_T	Cluster_6384_funcExplorer_integrated	funcExplorer	integrated	CL_0002057_LPS_24h	57	TRUE
chr11_74543826_G_T	chr11_74543826_G_T gene-level trans (FDR5%) in monocyte LPS_24h	gene-level	gene-level	CL_0002057_LPS_24h	577	TRUE
chr11_80588608_G_A	IC6_ICA_separate_CL_0002057_LPS_24h	ICA	separate	CL_0002057_LPS_24h	648	TRUE
chr11_80588608_G_A	chr11_80588608_G_A gene-level trans (FDR5%) in monocyte LPS_24h	gene-level	gene-level	CL_0002057_LPS_24h	13	FALSE
chr12_109073339_T_C	F30_PEER_integrated	PEER	integrated	CL_0000775_naive	929	TRUE
chr12_109073339_T_C	chr12_109073339_T_C gene-level trans (FDR5%) in neutrophil naive	gene-level	gene-level	CL_0000775_naive	140	TRUE
chr12_115701683_C_T	Cluster_1775_funcExplorer_integrated	funcExplorer	integrated	CL_0002057_naive	33	TRUE
chr12_115701683_C_T	chr12_115701683_C_T gene-level trans (FDR5%) in monocyte naive	gene-level	gene-level	CL_0002057_naive	29	TRUE
chr12_124919185_G_A	IC39_ICA_integrated	ICA	integrated	CL_0002057_LPS_24h	1109	TRUE
chr12_124919185_G_A	chr12_124919185_G_A gene-level trans (FDR5%) in monocyte LPS_24h	gene-level	gene-level	CL_0002057_LPS_24h	394	TRUE
chr12_124919185_G_A	chr12_124919185_G_A gene-level trans (FDR5%) in monocyte IFNg_24h	gene-level	gene-level	CL_0002057_IFNg_24h	1	FALSE
chr12_125874670_A_C	Cluster_7727_funcExplorer_separate_CL_0000624_naive	funcExplorer	separate	CL_0000624_naive	21	TRUE
chr12_125874670_A_C	chr12_125874670_A_C gene-level trans (FDR5%) in CD4+ T cell naive	gene-level	gene-level	CL_0000624_naive	1099	TRUE
chr12_125874670_A_C	chr12_125874670_A_C gene-level trans (FDR5%) in CD8+ T cell naive	gene-level	gene-level	CL_0000625_naive	15	FALSE
chr12_27451502_A_G	MEgreenyellow_WGCNA_integrated	WGCNA	integrated	CL_0002057_LPS_24h	279	TRUE
chr12_27451502_A_G	chr12_27451502_A_G gene-level trans (FDR5%) in monocyte LPS_24h	gene-level	gene-level	CL_0002057_LPS_24h	844	TRUE
chr12_29637087_C_A	Cluster_7845_funcExplorer_separate_CL_0000625_naive	funcExplorer	separate	CL_0000625_naive	7	TRUE
chr12_29637087_C_A	chr12_29637087_C_A gene-level trans (FDR5%) in CD8+ T cell naive	gene-level	gene-level	CL_0000625_naive	845	TRUE
chr12_32716242_T_TG	F2_PEER_separate_CL_0002057_LPS_24h	PEER	separate	CL_0002057_LPS_24h	1282	TRUE
chr12_32716242_T_TG	Cluster_12531_funcExplorer_separate_CL_0002057_LPS_24h	funcExplorer	separate	CL_0002057_LPS_24h	11	TRUE
chr12_32716242_T_TG	Cluster_6309_funcExplorer_separate_CL_0002057_LPS_24h	funcExplorer	separate	CL_0002057_LPS_24h	15	TRUE
chr12_32716242_T_TG	chr12_32716242_T_TG gene-level trans (FDR5%) in monocyte LPS_24h	gene-level	gene-level	CL_0002057_LPS_24h	1876	TRUE
chr12_3679237_T_C	Cluster_11951_funcExplorer_integrated	funcExplorer	integrated	CL_0002057_IFNg_24h	22	TRUE
chr12_3679237_T_C	chr12_3679237_T_C gene-level trans (FDR5%) in monocyte LPS_24h	gene-level	gene-level	CL_0002057_LPS_24h	2	FALSE
chr12_3679237_T_C	chr12_3679237_T_C gene-level trans (FDR5%) in monocyte IFNg_24h	gene-level	gene-level	CL_0002057_IFNg_24h	6	TRUE
chr12_67593746_TAAAAAA_T	F15_PEER_integrated	PEER	integrated	CL_0000775_naive	1029	TRUE
chr12_67593746_TAAAAAA_T	chr12_67593746_TAAAAAA_T gene-level trans (FDR5%) in neutrophil naive	gene-level	gene-level	CL_0000775_naive	890	TRUE
chr12_67593746_TAAAAAA_T	chr12_67593746_TAAAAAA_T gene-level trans (FDR5%) in monocyte IFNg_24h	gene-level	gene-level	CL_0002057_IFNg_24h	1	FALSE
chr12_69344099_A_G	F47_PEER_separate_CL_0002057_naive	PEER	separate	CL_0002057_naive	887	TRUE
chr12_69344099_A_G	MEfloralwhite_WGCNA_integrated	WGCNA	integrated	CL_0002057_LPS_2h	52	TRUE
chr12_69344099_A_G	MEfloralwhite_WGCNA_integrated	WGCNA	integrated	CL_0002057_naive	52	TRUE
chr12_69344099_A_G	MEfloralwhite_WGCNA_integrated	WGCNA	integrated	CL_0002057_IFNg_24h	52	TRUE
chr12_69344099_A_G	F29_PEER_integrated	PEER	integrated	CL_0002057_IFNg_24h	1018	TRUE
chr12_69344099_A_G	F29_PEER_integrated	PEER	integrated	CL_0002057_naive	1018	TRUE
chr12_69344099_A_G	F19_PEER_separate_CL_0002057_IFNg_24h	PEER	separate	CL_0002057_IFNg_24h	975	TRUE
chr12_69344099_A_G	MEyellowgreen_WGCNA_separate_CL_0002057_LPS_2h	WGCNA	separate	CL_0002057_LPS_2h	30	FALSE
chr12_69344099_A_G	MEpaleturquoise_WGCNA_separate_CL_0002057_LPS_24h	WGCNA	separate	CL_0002057_LPS_24h	87	FALSE
chr12_69344099_A_G	F16_PEER_separate_CL_0002057_naive	PEER	separate	CL_0002057_naive	1099	TRUE
chr12_69344099_A_G	X5.LU_EZH2_TARGETS_DN_PLIER_integrated	PLIER	integrated	CL_0002057_naive	321	TRUE
chr12_69344099_A_G	X5.LU_EZH2_TARGETS_DN_PLIER_integrated	PLIER	integrated	CL_0002057_LPS_24h	321	TRUE
chr12_69344099_A_G	X5.LU_EZH2_TARGETS_DN_PLIER_integrated	PLIER	integrated	CL_0002057_IFNg_24h	321	TRUE
chr12_69344099_A_G	X5.LU_EZH2_TARGETS_DN_PLIER_integrated	PLIER	integrated	CL_0002057_LPS_2h	321	TRUE
chr12_69344099_A_G	MEsalmon_WGCNA_integrated	WGCNA	integrated	CL_0002057_naive	256	TRUE
chr12_69344099_A_G	MEsalmon_WGCNA_integrated	WGCNA	integrated	CL_0002057_LPS_2h	256	TRUE
chr12_69344099_A_G	MEsalmon_WGCNA_integrated	WGCNA	integrated	CL_0002057_IFNg_24h	256	TRUE
chr12_69344099_A_G	Cluster_17911_funcExplorer_separate_CL_0002057_LPS_2h	funcExplorer	separate	CL_0002057_LPS_2h	6	TRUE
chr12_69344099_A_G	F49_PEER_separate_CL_0002057_LPS_24h	PEER	separate	CL_0002057_LPS_24h	939	TRUE
chr12_69344099_A_G	MEsalmon_WGCNA_separate_CL_0002057_LPS_2h	WGCNA	separate	CL_0002057_LPS_2h	136	FALSE
chr12_69344099_A_G	IC86_ICA_integrated	ICA	integrated	CL_0002057_LPS_2h	309	TRUE
chr12_69344099_A_G	IC86_ICA_integrated	ICA	integrated	CL_0002057_IFNg_24h	309	TRUE
chr12_69344099_A_G	IC86_ICA_integrated	ICA	integrated	CL_0002057_LPS_24h	309	TRUE
chr12_69344099_A_G	IC86_ICA_integrated	ICA	integrated	CL_0002057_naive	309	TRUE
chr12_69344099_A_G	F33_PEER_integrated	PEER	integrated	CL_0002057_naive	951	TRUE
chr12_69344099_A_G	F33_PEER_integrated	PEER	integrated	CL_0002057_IFNg_24h	951	TRUE
chr12_69344099_A_G	IC152_ICA_integrated	ICA	integrated	CL_0002057_IFNg_24h	398	TRUE
chr12_69344099_A_G	IC152_ICA_integrated	ICA	integrated	CL_0002057_naive	398	TRUE
chr12_69344099_A_G	X42.GSE29617_CTRL_VS_DAY3_TIV_FLU_VACCINE_PBMC_2008_UP_PLIER_integrated	PLIER	integrated	CL_0002057_naive	851	TRUE
chr12_69344099_A_G	X42.GSE29617_CTRL_VS_DAY3_TIV_FLU_VACCINE_PBMC_2008_UP_PLIER_integrated	PLIER	integrated	CL_0002057_IFNg_24h	851	TRUE
chr12_69344099_A_G	IC20_ICA_integrated	ICA	integrated	CL_0002057_naive	825	FALSE
chr12_69344099_A_G	IC20_ICA_integrated	ICA	integrated	CL_0002057_LPS_2h	825	FALSE
chr12_69344099_A_G	IC20_ICA_integrated	ICA	integrated	CL_0002057_IFNg_24h	825	FALSE
chr12_69344099_A_G	F24_PEER_separate_CL_0002057_LPS_2h	PEER	separate	CL_0002057_LPS_2h	866	TRUE
chr12_69344099_A_G	F40_PEER_integrated	PEER	integrated	CL_0002057_naive	1054	TRUE
chr12_69344099_A_G	IC8_ICA_separate_CL_0002057_LPS_2h	ICA	separate	CL_0002057_LPS_2h	408	TRUE
chr12_69344099_A_G	F21_PEER_integrated	PEER	integrated	CL_0002057_naive	973	TRUE
chr12_69344099_A_G	F29_PEER_separate_CL_0002057_naive	PEER	separate	CL_0002057_naive	854	TRUE
chr12_69344099_A_G	IC13_ICA_separate_CL_0002057_LPS_24h	ICA	separate	CL_0002057_LPS_24h	458	TRUE
chr12_69344099_A_G	F48_PEER_integrated	PEER	integrated	CL_0002057_naive	1081	TRUE
chr12_69344099_A_G	F48_PEER_integrated	PEER	integrated	CL_0002057_IFNg_24h	1081	TRUE
chr12_69344099_A_G	X18.LU_EZH2_TARGETS_DN_PLIER_separate_CL_0002057_LPS_24h	PLIER	separate	CL_0002057_LPS_24h	355	TRUE
chr12_69344099_A_G	F14_PEER_separate_CL_0002057_IFNg_24h	PEER	separate	CL_0002057_IFNg_24h	958	TRUE
chr12_69344099_A_G	F27_PEER_separate_CL_0002057_naive	PEER	separate	CL_0002057_naive	964	TRUE
chr12_69344099_A_G	F49_PEER_integrated	PEER	integrated	CL_0002057_naive	983	TRUE
chr12_69344099_A_G	F23_PEER_separate_CL_0002057_LPS_2h	PEER	separate	CL_0002057_LPS_2h	841	TRUE
chr12_69344099_A_G	F38_PEER_integrated	PEER	integrated	CL_0002057_naive	1070	TRUE
chr12_69344099_A_G	F15_PEER_separate_CL_0002057_IFNg_24h	PEER	separate	CL_0002057_IFNg_24h	1023	TRUE
chr12_69344099_A_G	F32_PEER_integrated	PEER	integrated	CL_0002057_naive	1026	TRUE
chr12_69344099_A_G	F32_PEER_integrated	PEER	integrated	CL_0002057_IFNg_24h	1026	TRUE
chr12_69344099_A_G	F39_PEER_integrated	PEER	integrated	CL_0002057_naive	916	TRUE
chr12_69344099_A_G	F39_PEER_integrated	PEER	integrated	CL_0002057_IFNg_24h	916	TRUE
chr12_69344099_A_G	Cluster_3419_funcExplorer_integrated	funcExplorer	integrated	CL_0002057_IFNg_24h	900	TRUE
chr12_69344099_A_G	F25_PEER_integrated	PEER	integrated	CL_0002057_IFNg_24h	990	TRUE
chr12_69344099_A_G	X16.LU_EZH2_TARGETS_DN_PLIER_separate_CL_0002057_naive	PLIER	separate	CL_0002057_naive	265	TRUE
chr12_69344099_A_G	X32.CHEN_ETV5_TARGETS_TESTIS_PLIER_integrated	PLIER	integrated	CL_0002057_IFNg_24h	383	TRUE
chr12_69344099_A_G	X32.CHEN_ETV5_TARGETS_TESTIS_PLIER_integrated	PLIER	integrated	CL_0002057_naive	383	TRUE
chr12_69344099_A_G	Cluster_15295_funcExplorer_separate_CL_0002057_IFNg_24h	funcExplorer	separate	CL_0002057_IFNg_24h	19	TRUE
chr12_69344099_A_G	MEblack_WGCNA_separate_CL_0002057_IFNg_24h	WGCNA	separate	CL_0002057_IFNg_24h	309	TRUE
chr12_69344099_A_G	X2.TONKS_TARGETS_OF_RUNX1_RUNX1T1_FUSION_GRANULOCYTE_DN_PLIER_separate_CL_0002057_IFNg_24h	PLIER	separate	CL_0002057_IFNg_24h	268	TRUE
chr12_69344099_A_G	Cluster_3977_funcExplorer_separate_CL_0002057_IFNg_24h	funcExplorer	separate	CL_0002057_IFNg_24h	14	TRUE
chr12_69344099_A_G	IC6_ICA_separate_CL_0002057_naive	ICA	separate	CL_0002057_naive	379	TRUE
chr12_69344099_A_G	F20_PEER_integrated	PEER	integrated	CL_0002057_IFNg_24h	1131	TRUE
chr12_69344099_A_G	IC11_ICA_separate_CL_0002057_IFNg_24h	ICA	separate	CL_0002057_IFNg_24h	872	TRUE
chr12_69344099_A_G	IC10_ICA_separate_CL_0002057_naive	ICA	separate	CL_0002057_naive	390	FALSE
chr12_69344099_A_G	F17_PEER_separate_CL_0002057_naive	PEER	separate	CL_0002057_naive	973	TRUE
chr12_69344099_A_G	Cluster_958_funcExplorer_separate_CL_0002057_naive	funcExplorer	separate	CL_0002057_naive	658	TRUE
chr12_69344099_A_G	IC24_ICA_separate_CL_0002057_IFNg_24h	ICA	separate	CL_0002057_IFNg_24h	371	TRUE
chr12_69344099_A_G	F47_PEER_integrated	PEER	integrated	CL_0002057_IFNg_24h	987	TRUE
chr12_69344099_A_G	F47_PEER_integrated	PEER	integrated	CL_0002057_naive	987	TRUE
chr12_69344099_A_G	F23_PEER_separate_CL_0002057_naive	PEER	separate	CL_0002057_naive	948	TRUE
chr12_69344099_A_G	Cluster_13927_funcExplorer_separate_CL_0002057_IFNg_24h	funcExplorer	separate	CL_0002057_IFNg_24h	9	TRUE
chr12_69344099_A_G	F41_PEER_integrated	PEER	integrated	CL_0002057_naive	933	TRUE
chr12_69344099_A_G	X14.LU_EZH2_TARGETS_DN_PLIER_separate_CL_0002057_LPS_2h	PLIER	separate	CL_0002057_LPS_2h	382	TRUE
chr12_69344099_A_G	MEgreen_WGCNA_separate_CL_0002057_naive	WGCNA	separate	CL_0002057_naive	250	TRUE
chr12_69344099_A_G	chr12_69344099_A_G gene-level trans (FDR5%) in monocyte naive	gene-level	gene-level	CL_0002057_naive	335	TRUE
chr12_69344099_A_G	chr12_69344099_A_G gene-level trans (FDR5%) in monocyte IFNg_24h	gene-level	gene-level	CL_0002057_IFNg_24h	383	TRUE
chr12_69344099_A_G	chr12_69344099_A_G gene-level trans (FDR5%) in monocyte LPS_2h	gene-level	gene-level	CL_0002057_LPS_2h	162	FALSE
chr12_69344099_A_G	chr12_69344099_A_G gene-level trans (FDR5%) in monocyte LPS_24h	gene-level	gene-level	CL_0002057_LPS_24h	76	FALSE
chr12_69344099_A_G	chr12_69344099_A_G gene-level trans (FDR5%) in neutrophil naive	gene-level	gene-level	CL_0000775_naive	2	TRUE
chr12_71913836_A_G	MElightpink4_WGCNA_separate_CL_0000625_naive	WGCNA	separate	CL_0000625_naive	27	TRUE
chr12_71913836_A_G	Cluster_7145_funcExplorer_separate_CL_0000625_naive	funcExplorer	separate	CL_0000625_naive	27	TRUE
chr12_71913836_A_G	chr12_71913836_A_G gene-level trans (FDR5%) in CD8+ T cell naive	gene-level	gene-level	CL_0000625_naive	181	TRUE
chr12_71913836_A_G	chr12_71913836_A_G gene-level trans (FDR5%) in monocyte IFNg_24h	gene-level	gene-level	CL_0002057_IFNg_24h	1	FALSE
chr12_96341344_C_T	X6.SVM.Macrophages.M1_PLIER_separate_CL_0002057_IFNg_24h	PLIER	separate	CL_0002057_IFNg_24h	738	TRUE
chr12_96341344_C_T	IC113_ICA_integrated	ICA	integrated	CL_0002057_IFNg_24h	965	TRUE
chr12_96341344_C_T	IC7_ICA_separate_CL_0002057_IFNg_24h	ICA	separate	CL_0002057_IFNg_24h	1128	TRUE
chr12_96341344_C_T	chr12_96341344_C_T gene-level trans (FDR5%) in monocyte IFNg_24h	gene-level	gene-level	CL_0002057_IFNg_24h	120	TRUE
chr12_96341344_C_T	chr12_96341344_C_T gene-level trans (FDR5%) in monocyte LPS_2h	gene-level	gene-level	CL_0002057_LPS_2h	1	FALSE
chr13_109044506_G_A	Cluster_2905_funcExplorer_integrated	funcExplorer	integrated	CL_0000236_naive	14	TRUE
chr13_109044506_G_A	chr13_109044506_G_A gene-level trans (FDR5%) in B cell naive	gene-level	gene-level	CL_0000236_naive	1497	TRUE
chr13_112444498_G_T	IC2_ICA_separate_CL_0000624_naive	ICA	separate	CL_0000624_naive	1228	TRUE
chr13_112444498_G_T	chr13_112444498_G_T gene-level trans (FDR5%) in CD4+ T cell naive	gene-level	gene-level	CL_0000624_naive	845	TRUE
chr13_112444498_G_T	chr13_112444498_G_T gene-level trans (FDR5%) in monocyte LPS_2h	gene-level	gene-level	CL_0002057_LPS_2h	2	FALSE
chr13_112444498_G_T	chr13_112444498_G_T gene-level trans (FDR5%) in neutrophil naive	gene-level	gene-level	CL_0000775_naive	1	FALSE
chr13_112444498_G_T	chr13_112444498_G_T gene-level trans (FDR5%) in CD8+ T cell naive	gene-level	gene-level	CL_0000625_naive	1	FALSE
chr13_113228695_A_C	Cluster_10379_funcExplorer_separate_CL_0000775_naive	funcExplorer	separate	CL_0000775_naive	7	TRUE
chr13_113228695_A_C	chr13_113228695_A_C gene-level trans (FDR5%) in neutrophil naive	gene-level	gene-level	CL_0000775_naive	424	TRUE
chr13_113228695_A_C	chr13_113228695_A_C gene-level trans (FDR5%) in monocyte naive	gene-level	gene-level	CL_0002057_naive	287	TRUE
chr13_113228695_A_C	chr13_113228695_A_C gene-level trans (FDR5%) in CD8+ T cell naive	gene-level	gene-level	CL_0000625_naive	29	FALSE
chr13_21346592_G_C	F49_PEER_integrated	PEER	integrated	CL_0002057_LPS_2h	983	TRUE
chr13_21346592_G_C	chr13_21346592_G_C gene-level trans (FDR5%) in monocyte LPS_2h	gene-level	gene-level	CL_0002057_LPS_2h	225	TRUE
chr13_48867533_T_C	X36.MIPS_RIBOSOME_CYTOPLASMIC_PLIER_separate_CL_0002057_LPS_2h	PLIER	separate	CL_0002057_LPS_2h	734	TRUE
chr13_48867533_T_C	chr13_48867533_T_C gene-level trans (FDR5%) in monocyte LPS_2h	gene-level	gene-level	CL_0002057_LPS_2h	8	FALSE
chr13_51432448_AATTT_A	Cluster_6081_funcExplorer_separate_CL_0000624_naive	funcExplorer	separate	CL_0000624_naive	7	TRUE
chr13_51432448_AATTT_A	chr13_51432448_AATTT_A gene-level trans (FDR5%) in CD4+ T cell naive	gene-level	gene-level	CL_0000624_naive	61	TRUE
chr13_53558741_C_G	Cluster_4992_funcExplorer_integrated	funcExplorer	integrated	CL_0000233_naive	6	TRUE
chr13_53558741_C_G	chr13_53558741_C_G gene-level trans (FDR5%) in platelet naive	gene-level	gene-level	CL_0000233_naive	843	TRUE
chr13_53558741_C_G	chr13_53558741_C_G gene-level trans (FDR5%) in neutrophil naive	gene-level	gene-level	CL_0000775_naive	1	TRUE
chr14_21126994_C_A	Cluster_11936_funcExplorer_integrated	funcExplorer	integrated	CL_0002057_naive	22	TRUE
chr14_21126994_C_A	MEdarkmagenta_WGCNA_separate_CL_0002057_naive	WGCNA	separate	CL_0002057_naive	20	TRUE
chr14_21126994_C_A	chr14_21126994_C_A gene-level trans (FDR5%) in monocyte IFNg_24h	gene-level	gene-level	CL_0002057_IFNg_24h	2	TRUE
chr14_21126994_C_A	chr14_21126994_C_A gene-level trans (FDR5%) in monocyte LPS_24h	gene-level	gene-level	CL_0002057_LPS_24h	3	TRUE
chr14_21126994_C_A	chr14_21126994_C_A gene-level trans (FDR5%) in monocyte naive	gene-level	gene-level	CL_0002057_naive	14	TRUE
chr14_30343667_A_G	MEorangered4_WGCNA_integrated	WGCNA	integrated	CL_0002057_naive	63	TRUE
chr14_30343667_A_G	chr14_30343667_A_G gene-level trans (FDR5%) in monocyte naive	gene-level	gene-level	CL_0002057_naive	196	TRUE
chr14_35924927_G_A	Cluster_3519_funcExplorer_integrated	funcExplorer	integrated	CL_0000236_naive	6	TRUE
chr14_35924927_G_A	chr14_35924927_G_A gene-level trans (FDR5%) in B cell naive	gene-level	gene-level	CL_0000236_naive	38	TRUE
chr14_44455083_TA_T	Cluster_3428_funcExplorer_integrated	funcExplorer	integrated	CL_0000624_naive	5	TRUE
chr14_44455083_TA_T	chr14_44455083_TA_T gene-level trans (FDR5%) in CD4+ T cell naive	gene-level	gene-level	CL_0000624_naive	94	TRUE
chr14_52350480_CG_CGG	LV.22_PLIER_separate_CL_0000775_naive	PLIER	separate	CL_0000775_naive	970	TRUE
chr14_52350480_CG_CGG	chr14_52350480_CG_CGG gene-level trans (FDR5%) in neutrophil naive	gene-level	gene-level	CL_0000775_naive	7	FALSE
chr14_54634260_C_T	Cluster_11106_funcExplorer_integrated	funcExplorer	integrated	CL_0002057_LPS_2h	22	TRUE
chr14_54634260_C_T	chr14_54634260_C_T gene-level trans (FDR5%) in monocyte LPS_2h	gene-level	gene-level	CL_0002057_LPS_2h	33	TRUE
chr14_74335301_T_C	X28.IRIS_Monocyte.Day0_PLIER_separate_CL_0002057_IFNg_24h	PLIER	separate	CL_0002057_IFNg_24h	778	TRUE
chr14_74335301_T_C	chr14_74335301_T_C gene-level trans (FDR5%) in monocyte IFNg_24h	gene-level	gene-level	CL_0002057_IFNg_24h	72	FALSE
chr14_88030463_T_C	Cluster_12631_funcExplorer_integrated	funcExplorer	integrated	CL_0002057_LPS_2h	107	TRUE
chr14_88030463_T_C	chr14_88030463_T_C gene-level trans (FDR5%) in monocyte LPS_2h	gene-level	gene-level	CL_0002057_LPS_2h	111	TRUE
chr14_92570659_C_CA	X26.RAGHAVACHARI_PLATELET_SPECIFIC_GENES_PLIER_integrated	PLIER	integrated	CL_0000236_naive	852	TRUE
chr14_92570659_C_CA	chr14_92570659_C_CA gene-level trans (FDR5%) in B cell naive	gene-level	gene-level	CL_0000236_naive	17	TRUE
chr14_92570659_C_CA	chr14_92570659_C_CA gene-level trans (FDR5%) in CD8+ T cell naive	gene-level	gene-level	CL_0000625_naive	2	FALSE
chr14_94740969_T_A	IC34_ICA_separate_CL_0000625_naive	ICA	separate	CL_0000625_naive	721	TRUE
chr14_94740969_T_A	chr14_94740969_T_A gene-level trans (FDR5%) in CD8+ T cell naive	gene-level	gene-level	CL_0000625_naive	13	TRUE
chr14_94740969_T_A	chr14_94740969_T_A gene-level trans (FDR5%) in monocyte naive	gene-level	gene-level	CL_0002057_naive	1	FALSE
chr15_100108173_C_T	X25.REACTOME_MEIOTIC_RECOMBINATION_PLIER_separate_CL_0000625_naive	PLIER	separate	CL_0000625_naive	545	TRUE
chr15_100108173_C_T	chr15_100108173_C_T gene-level trans (FDR5%) in CD8+ T cell naive	gene-level	gene-level	CL_0000625_naive	1	FALSE
chr15_26767696_A_C	Cluster_4624_funcExplorer_integrated	funcExplorer	integrated	CL_0000233_naive	115	TRUE
chr15_26767696_A_C	chr15_26767696_A_C gene-level trans (FDR5%) in platelet naive	gene-level	gene-level	CL_0000233_naive	1480	TRUE
chr15_26767696_A_C	chr15_26767696_A_C gene-level trans (FDR5%) in neutrophil naive	gene-level	gene-level	CL_0000775_naive	1	FALSE
chr15_32957397_C_G	X7.CHOI_ATL_CHRONIC_VS_ACUTE_DN_PLIER_separate_CL_0000775_naive	PLIER	separate	CL_0000775_naive	826	TRUE
chr15_32957397_C_G	MEpurple_WGCNA_separate_CL_0000775_naive	WGCNA	separate	CL_0000775_naive	137	TRUE
chr15_32957397_C_G	Cluster_4305_funcExplorer_integrated	funcExplorer	integrated	CL_0000775_naive	15	TRUE
chr15_32957397_C_G	MEdarkgrey_WGCNA_integrated	WGCNA	integrated	CL_0000775_naive	136	TRUE
chr15_32957397_C_G	chr15_32957397_C_G gene-level trans (FDR5%) in neutrophil naive	gene-level	gene-level	CL_0000775_naive	1345	TRUE
chr15_32957397_C_G	chr15_32957397_C_G gene-level trans (FDR5%) in platelet naive	gene-level	gene-level	CL_0000233_naive	1	FALSE
chr15_36752984_G_A	LV.30_PLIER_separate_CL_0002057_LPS_24h	PLIER	separate	CL_0002057_LPS_24h	950	TRUE
chr15_36752984_G_A	chr15_36752984_G_A gene-level trans (FDR5%) in monocyte LPS_24h	gene-level	gene-level	CL_0002057_LPS_24h	46	TRUE
chr15_37689491_T_C	IC153_ICA_integrated	ICA	integrated	CL_0002057_LPS_2h	956	TRUE
chr15_37689491_T_C	chr15_37689491_T_C gene-level trans (FDR5%) in monocyte LPS_2h	gene-level	gene-level	CL_0002057_LPS_2h	33	TRUE
chr15_37689491_T_C	chr15_37689491_T_C gene-level trans (FDR5%) in monocyte LPS_24h	gene-level	gene-level	CL_0002057_LPS_24h	1	FALSE
chr15_38056885_C_CA	F2_PEER_integrated	PEER	integrated	CL_0000624_naive	839	TRUE
chr15_38056885_C_CA	chr15_38056885_C_CA gene-level trans (FDR5%) in CD4+ T cell naive	gene-level	gene-level	CL_0000624_naive	2345	TRUE
chr15_38056885_C_CA	chr15_38056885_C_CA gene-level trans (FDR5%) in CD8+ T cell naive	gene-level	gene-level	CL_0000625_naive	320	TRUE
chr15_38056885_C_CA	chr15_38056885_C_CA gene-level trans (FDR5%) in B cell naive	gene-level	gene-level	CL_0000236_naive	1	FALSE
chr15_62636845_A_T	MElightgreen_WGCNA_separate_CL_0000625_naive	WGCNA	separate	CL_0000625_naive	123	TRUE
chr15_62636845_A_T	chr15_62636845_A_T gene-level trans (FDR5%) in CD8+ T cell naive	gene-level	gene-level	CL_0000625_naive	528	TRUE
chr15_62636845_A_T	chr15_62636845_A_T gene-level trans (FDR5%) in CD4+ T cell naive	gene-level	gene-level	CL_0000624_naive	13	FALSE
chr15_62636845_A_T	chr15_62636845_A_T gene-level trans (FDR5%) in platelet naive	gene-level	gene-level	CL_0000233_naive	2	FALSE
chr15_71236096_G_T	F2_PEER_separate_CL_0002057_naive	PEER	separate	CL_0002057_naive	1446	TRUE
chr15_71236096_G_T	chr15_71236096_G_T gene-level trans (FDR5%) in monocyte naive	gene-level	gene-level	CL_0002057_naive	654	TRUE
chr15_71236096_G_T	chr15_71236096_G_T gene-level trans (FDR5%) in monocyte LPS_2h	gene-level	gene-level	CL_0002057_LPS_2h	1	FALSE
chr15_72112972_T_C	F36_PEER_integrated	PEER	integrated	CL_0000625_naive	967	TRUE
chr15_72112972_T_C	chr15_72112972_T_C gene-level trans (FDR5%) in CD8+ T cell naive	gene-level	gene-level	CL_0000625_naive	73	TRUE
chr16_12158544_G_A	Cluster_8416_funcExplorer_separate_CL_0002057_LPS_24h	funcExplorer	separate	CL_0002057_LPS_24h	5	TRUE
chr16_12158544_G_A	chr16_12158544_G_A gene-level trans (FDR5%) in monocyte LPS_24h	gene-level	gene-level	CL_0002057_LPS_24h	112	TRUE
chr16_3328831_G_C	Cluster_10685_funcExplorer_integrated	funcExplorer	integrated	CL_0002057_LPS_24h	5	TRUE
chr16_3328831_G_C	chr16_3328831_G_C gene-level trans (FDR5%) in monocyte LPS_24h	gene-level	gene-level	CL_0002057_LPS_24h	914	TRUE
chr16_53433130_TAAAG_T	F5_PEER_separate_CL_0000624_naive	PEER	separate	CL_0000624_naive	1244	TRUE
chr16_53433130_TAAAG_T	chr16_53433130_TAAAG_T gene-level trans (FDR5%) in CD4+ T cell naive	gene-level	gene-level	CL_0000624_naive	280	TRUE
chr16_57946800_G_T	MEmidnightblue_WGCNA_integrated	WGCNA	integrated	CL_0002057_IFNg_24h	245	TRUE
chr16_57946800_G_T	chr16_57946800_G_T gene-level trans (FDR5%) in monocyte IFNg_24h	gene-level	gene-level	CL_0002057_IFNg_24h	49	TRUE
chr16_57946800_G_T	chr16_57946800_G_T gene-level trans (FDR5%) in monocyte LPS_24h	gene-level	gene-level	CL_0002057_LPS_24h	6	TRUE
chr16_6538604_G_C	IC33_ICA_integrated	ICA	integrated	CL_0002057_IFNg_24h	856	TRUE
chr16_6538604_G_C	X17.JI_CARCINOGENESIS_BY_KRAS_AND_STK11_DN_PLIER_integrated	PLIER	integrated	CL_0002057_IFNg_24h	862	TRUE
chr16_6538604_G_C	Cluster_3882_funcExplorer_separate_CL_0002057_IFNg_24h	funcExplorer	separate	CL_0002057_IFNg_24h	221	TRUE
chr16_6538604_G_C	chr16_6538604_G_C gene-level trans (FDR5%) in monocyte IFNg_24h	gene-level	gene-level	CL_0002057_IFNg_24h	1916	TRUE
chr16_69417011_C_G	MEdarkolivegreen_WGCNA_integrated	WGCNA	integrated	CL_0000625_naive	72	TRUE
chr16_69417011_C_G	chr16_69417011_C_G gene-level trans (FDR5%) in CD8+ T cell naive	gene-level	gene-level	CL_0000625_naive	2641	TRUE
chr16_69417011_C_G	chr16_69417011_C_G gene-level trans (FDR5%) in platelet naive	gene-level	gene-level	CL_0000233_naive	318	TRUE
chr16_7067951_AT_A	X2.GSE13485_DAY1_VS_DAY21_YF17D_VACCINE_PBMC_UP_PLIER_separate_CL_0000624_naive	PLIER	separate	CL_0000624_naive	999	TRUE
chr16_7067951_AT_A	chr16_7067951_AT_A gene-level trans (FDR5%) in CD4+ T cell naive	gene-level	gene-level	CL_0000624_naive	2080	TRUE
chr17_4210465_T_C	MEdarkslateblue_WGCNA_separate_CL_0000624_naive	WGCNA	separate	CL_0000624_naive	30	TRUE
chr17_4210465_T_C	chr17_4210465_T_C gene-level trans (FDR5%) in CD4+ T cell naive	gene-level	gene-level	CL_0000624_naive	15	TRUE
chr17_4210465_T_C	chr17_4210465_T_C gene-level trans (FDR5%) in CD8+ T cell naive	gene-level	gene-level	CL_0000625_naive	5	TRUE
chr17_49489893_C_T	Cluster_5687_funcExplorer_integrated	funcExplorer	integrated	CL_0000233_naive	12	TRUE
chr17_49489893_C_T	chr17_49489893_C_T gene-level trans (FDR5%) in platelet naive	gene-level	gene-level	CL_0000233_naive	2	TRUE
chr17_5918381_GTTTTTTTTTT_G	Cluster_12746_funcExplorer_integrated	funcExplorer	integrated	CL_0002057_IFNg_24h	6	TRUE
chr17_5918381_GTTTTTTTTTT_G	chr17_5918381_GTTTTTTTTTT_G gene-level trans (FDR5%) in monocyte IFNg_24h	gene-level	gene-level	CL_0002057_IFNg_24h	18	FALSE
chr17_5918381_GTTTTTTTTTT_G	chr17_5918381_GTTTTTTTTTT_G gene-level trans (FDR5%) in monocyte LPS_2h	gene-level	gene-level	CL_0002057_LPS_2h	1	FALSE
chr17_65394032_G_A	F49_PEER_integrated	PEER	integrated	CL_0002057_IFNg_24h	983	TRUE
chr17_65394032_G_A	chr17_65394032_G_A gene-level trans (FDR5%) in monocyte IFNg_24h	gene-level	gene-level	CL_0002057_IFNg_24h	110	TRUE
chr17_73125542_G_A	Cluster_15868_funcExplorer_separate_CL_0000625_naive	funcExplorer	separate	CL_0000625_naive	8	TRUE
chr17_73125542_G_A	chr17_73125542_G_A gene-level trans (FDR5%) in CD8+ T cell naive	gene-level	gene-level	CL_0000625_naive	942	TRUE
chr17_73125542_G_A	chr17_73125542_G_A gene-level trans (FDR5%) in CD4+ T cell naive	gene-level	gene-level	CL_0000624_naive	1	FALSE
chr17_7753805_G_A	MEturquoise_WGCNA_integrated	WGCNA	integrated	CL_0002057_LPS_2h	2522	TRUE
chr17_7753805_G_A	chr17_7753805_G_A gene-level trans (FDR5%) in monocyte LPS_2h	gene-level	gene-level	CL_0002057_LPS_2h	75	TRUE
chr17_7753805_G_A	chr17_7753805_G_A gene-level trans (FDR5%) in monocyte naive	gene-level	gene-level	CL_0002057_naive	2	FALSE
chr18_11410683_C_T	Cluster_16088_funcExplorer_separate_CL_0000775_naive	funcExplorer	separate	CL_0000775_naive	9	TRUE
chr18_11410683_C_T	chr18_11410683_C_T gene-level trans (FDR5%) in neutrophil naive	gene-level	gene-level	CL_0000775_naive	239	TRUE
chr18_331052_G_GT	X4.CREIGHTON_AKT1_SIGNALING_VIA_MTOR_DN_PLIER_separate_CL_0000233_naive	PLIER	separate	CL_0000233_naive	924	TRUE
chr18_331052_G_GT	chr18_331052_G_GT gene-level trans (FDR5%) in platelet naive	gene-level	gene-level	CL_0000233_naive	373	TRUE
chr18_61739860_T_C	X31.SVM.Macrophages.M1_PLIER_integrated	PLIER	integrated	CL_0000624_naive	711	TRUE
chr18_61739860_T_C	chr18_61739860_T_C gene-level trans (FDR5%) in CD4+ T cell naive	gene-level	gene-level	CL_0000624_naive	20	TRUE
chr18_61739860_T_C	chr18_61739860_T_C gene-level trans (FDR5%) in monocyte IFNg_24h	gene-level	gene-level	CL_0002057_IFNg_24h	1	FALSE
chr19_11275710_A_G	X81.SCHLESINGER_METHYLATED_IN_COLON_CANCER_PLIER_integrated	PLIER	integrated	CL_0000625_naive	838	TRUE
chr19_11275710_A_G	chr19_11275710_A_G gene-level trans (FDR5%) in CD8+ T cell naive	gene-level	gene-level	CL_0000625_naive	167	TRUE
chr19_11275710_A_G	chr19_11275710_A_G gene-level trans (FDR5%) in monocyte LPS_2h	gene-level	gene-level	CL_0002057_LPS_2h	1	TRUE
chr19_21975910_AC_A	IC138_ICA_integrated	ICA	integrated	CL_0000236_naive	729	TRUE
chr19_21975910_AC_A	IC12_ICA_separate_CL_0000236_naive	ICA	separate	CL_0000236_naive	608	TRUE
chr19_21975910_AC_A	chr19_21975910_AC_A gene-level trans (FDR5%) in B cell naive	gene-level	gene-level	CL_0000236_naive	48	FALSE
chr19_21975910_AC_A	chr19_21975910_AC_A gene-level trans (FDR5%) in monocyte naive	gene-level	gene-level	CL_0002057_naive	1	FALSE
chr19_33637316_C_A	Cluster_17671_funcExplorer_integrated	funcExplorer	integrated	CL_0000625_naive	9	TRUE
chr19_33637316_C_A	chr19_33637316_C_A gene-level trans (FDR5%) in CD8+ T cell naive	gene-level	gene-level	CL_0000625_naive	636	FALSE
chr19_33637316_C_A	chr19_33637316_C_A gene-level trans (FDR5%) in CD4+ T cell naive	gene-level	gene-level	CL_0000624_naive	1	TRUE
chr19_34840532_C_T	IC81_ICA_integrated	ICA	integrated	CL_0002057_LPS_24h	674	TRUE
chr19_34840532_C_T	chr19_34840532_C_T gene-level trans (FDR5%) in monocyte LPS_24h	gene-level	gene-level	CL_0002057_LPS_24h	99	FALSE
chr19_35004496_G_A	X27.GSE9006_TYPE_1_VS_TYPE_2_DIABETES_PBMC_AT_DX_UP_PLIER_integrated	PLIER	integrated	CL_0002057_LPS_24h	678	TRUE
chr19_35004496_G_A	chr19_35004496_G_A gene-level trans (FDR5%) in monocyte LPS_24h	gene-level	gene-level	CL_0002057_LPS_24h	10	FALSE
chr19_39881739_G_C	MEdarkorange_WGCNA_separate_CL_0000233_naive	WGCNA	separate	CL_0000233_naive	43	TRUE
chr19_39881739_G_C	chr19_39881739_G_C gene-level trans (FDR5%) in platelet naive	gene-level	gene-level	CL_0000233_naive	150	TRUE
chr19_39881739_G_C	chr19_39881739_G_C gene-level trans (FDR5%) in neutrophil naive	gene-level	gene-level	CL_0000775_naive	3	FALSE
chr19_51591205_G_C	Cluster_3874_funcExplorer_integrated	funcExplorer	integrated	CL_0000625_naive	15	TRUE
chr19_51591205_G_C	X50.GSE9006_TYPE_1_DIABETES_AT_DX_VS_1MONTH_POST_DX_PBMC_UP_PLIER_integrated	PLIER	integrated	CL_0000625_naive	771	TRUE
chr19_51591205_G_C	chr19_51591205_G_C gene-level trans (FDR5%) in CD8+ T cell naive	gene-level	gene-level	CL_0000625_naive	1283	TRUE
chr19_51591205_G_C	chr19_51591205_G_C gene-level trans (FDR5%) in CD4+ T cell naive	gene-level	gene-level	CL_0000624_naive	504	TRUE
chr19_51591205_G_C	chr19_51591205_G_C gene-level trans (FDR5%) in B cell naive	gene-level	gene-level	CL_0000236_naive	30	TRUE
chr19_57610450_A_G	IC35_ICA_integrated	ICA	integrated	CL_0002057_LPS_2h	1092	TRUE
chr19_57610450_A_G	chr19_57610450_A_G gene-level trans (FDR5%) in monocyte LPS_2h	gene-level	gene-level	CL_0002057_LPS_2h	945	TRUE
chr19_791153_C_T	Cluster_14064_funcExplorer_separate_CL_0000624_naive	funcExplorer	separate	CL_0000624_naive	37	TRUE
chr19_791153_C_T	chr19_791153_C_T gene-level trans (FDR5%) in CD4+ T cell naive	gene-level	gene-level	CL_0000624_naive	1888	TRUE
chr19_791153_C_T	chr19_791153_C_T gene-level trans (FDR5%) in CD8+ T cell naive	gene-level	gene-level	CL_0000625_naive	263	TRUE
chr2_114722281_G_A	X35.IRIS_Bcell.naive_PLIER_separate_CL_0000625_naive	PLIER	separate	CL_0000625_naive	325	TRUE
chr2_114722281_G_A	IC44_ICA_separate_CL_0000625_naive	ICA	separate	CL_0000625_naive	392	TRUE
chr2_114722281_G_A	X7.GSE10325_CD4_TCELL_VS_BCELL_DN_PLIER_integrated	PLIER	integrated	CL_0000625_naive	670	TRUE
chr2_114722281_G_A	chr2_114722281_G_A gene-level trans (FDR5%) in CD8+ T cell naive	gene-level	gene-level	CL_0000625_naive	202	TRUE
chr2_122139324_G_A	X5.LU_EZH2_TARGETS_DN_PLIER_integrated	PLIER	integrated	CL_0000625_naive	321	TRUE
chr2_122139324_G_A	chr2_122139324_G_A gene-level trans (FDR5%) in CD8+ T cell naive	gene-level	gene-level	CL_0000625_naive	335	TRUE
chr2_122139324_G_A	chr2_122139324_G_A gene-level trans (FDR5%) in CD4+ T cell naive	gene-level	gene-level	CL_0000624_naive	28	TRUE
chr2_122139324_G_A	chr2_122139324_G_A gene-level trans (FDR5%) in monocyte naive	gene-level	gene-level	CL_0002057_naive	15	TRUE
chr2_122139324_G_A	chr2_122139324_G_A gene-level trans (FDR5%) in monocyte IFNg_24h	gene-level	gene-level	CL_0002057_IFNg_24h	2	TRUE
chr2_124126209_G_A	Cluster_9557_funcExplorer_separate_CL_0000775_naive	funcExplorer	separate	CL_0000775_naive	9	TRUE
chr2_124126209_G_A	chr2_124126209_G_A gene-level trans (FDR5%) in neutrophil naive	gene-level	gene-level	CL_0000775_naive	88	TRUE
chr2_124126209_G_A	chr2_124126209_G_A gene-level trans (FDR5%) in CD4+ T cell naive	gene-level	gene-level	CL_0000624_naive	1	FALSE
chr2_135011557_C_T	Cluster_7177_funcExplorer_separate_CL_0000775_naive	funcExplorer	separate	CL_0000775_naive	9	TRUE
chr2_135011557_C_T	F13_PEER_integrated	PEER	integrated	CL_0000775_naive	929	TRUE
chr2_135011557_C_T	chr2_135011557_C_T gene-level trans (FDR5%) in neutrophil naive	gene-level	gene-level	CL_0000775_naive	188	TRUE
chr2_136865011_T_C	Cluster_4050_funcExplorer_separate_CL_0002057_IFNg_24h	funcExplorer	separate	CL_0002057_IFNg_24h	217	TRUE
chr2_136865011_T_C	chr2_136865011_T_C gene-level trans (FDR5%) in monocyte IFNg_24h	gene-level	gene-level	CL_0002057_IFNg_24h	164	TRUE
chr2_144947450_C_T	MEblack_WGCNA_separate_CL_0000233_naive	WGCNA	separate	CL_0000233_naive	120	TRUE
chr2_144947450_C_T	chr2_144947450_C_T gene-level trans (FDR5%) in platelet naive	gene-level	gene-level	CL_0000233_naive	127	TRUE
chr2_153635232_G_C	Cluster_8680_funcExplorer_integrated	funcExplorer	integrated	CL_0000236_naive	20	TRUE
chr2_153635232_G_C	chr2_153635232_G_C gene-level trans (FDR5%) in B cell naive	gene-level	gene-level	CL_0000236_naive	502	TRUE
chr2_174382972_T_C	X49.LU_TUMOR_VASCULATURE_DN_PLIER_integrated	PLIER	integrated	CL_0000625_naive	592	TRUE
chr2_174382972_T_C	chr2_174382972_T_C gene-level trans (FDR5%) in CD4+ T cell naive	gene-level	gene-level	CL_0000624_naive	1277	TRUE
chr2_174382972_T_C	chr2_174382972_T_C gene-level trans (FDR5%) in CD8+ T cell naive	gene-level	gene-level	CL_0000625_naive	563	TRUE
chr2_183072434_C_G	IC109_ICA_integrated	ICA	integrated	CL_0002057_LPS_24h	990	TRUE
chr2_183072434_C_G	chr2_183072434_C_G gene-level trans (FDR5%) in monocyte LPS_24h	gene-level	gene-level	CL_0002057_LPS_24h	29	FALSE
chr2_183072434_C_G	chr2_183072434_C_G gene-level trans (FDR5%) in CD8+ T cell naive	gene-level	gene-level	CL_0000625_naive	1	FALSE
chr2_184508425_A_G	Cluster_1294_funcExplorer_integrated	funcExplorer	integrated	CL_0002057_IFNg_24h	9	TRUE
chr2_184508425_A_G	chr2_184508425_A_G gene-level trans (FDR5%) in monocyte IFNg_24h	gene-level	gene-level	CL_0002057_IFNg_24h	443	TRUE
chr2_184508425_A_G	chr2_184508425_A_G gene-level trans (FDR5%) in B cell naive	gene-level	gene-level	CL_0000236_naive	1	FALSE
chr2_184508425_A_G	chr2_184508425_A_G gene-level trans (FDR5%) in neutrophil naive	gene-level	gene-level	CL_0000775_naive	1	FALSE
chr2_19044288_TA_T	Cluster_11446_funcExplorer_separate_CL_0002057_IFNg_24h	funcExplorer	separate	CL_0002057_IFNg_24h	5	TRUE
chr2_19044288_TA_T	chr2_19044288_TA_T gene-level trans (FDR5%) in monocyte IFNg_24h	gene-level	gene-level	CL_0002057_IFNg_24h	227	TRUE
chr2_195485702_C_G	IC161_ICA_integrated	ICA	integrated	CL_0002057_LPS_24h	905	TRUE
chr2_195485702_C_G	chr2_195485702_C_G gene-level trans (FDR5%) in monocyte LPS_24h	gene-level	gene-level	CL_0002057_LPS_24h	10	FALSE
chr2_195485702_C_G	chr2_195485702_C_G gene-level trans (FDR5%) in CD8+ T cell naive	gene-level	gene-level	CL_0000625_naive	1	TRUE
chr2_222691534_A_T	F43_PEER_integrated	PEER	integrated	CL_0000775_naive	931	TRUE
chr2_222691534_A_T	chr2_222691534_A_T gene-level trans (FDR5%) in neutrophil naive	gene-level	gene-level	CL_0000775_naive	32	TRUE
chr2_229544585_G_T	MEsteelblue_WGCNA_separate_CL_0002057_LPS_24h	WGCNA	separate	CL_0002057_LPS_24h	91	TRUE
chr2_229544585_G_T	chr2_229544585_G_T gene-level trans (FDR5%) in monocyte LPS_24h	gene-level	gene-level	CL_0002057_LPS_24h	1138	TRUE
chr2_231442313_CT_C	Cluster_3912_funcExplorer_integrated	funcExplorer	integrated	CL_0002057_LPS_24h	8	TRUE
chr2_231442313_CT_C	chr2_231442313_CT_C gene-level trans (FDR5%) in monocyte LPS_24h	gene-level	gene-level	CL_0002057_LPS_24h	511	TRUE
chr2_231442313_CT_C	chr2_231442313_CT_C gene-level trans (FDR5%) in monocyte LPS_2h	gene-level	gene-level	CL_0002057_LPS_2h	147	TRUE
chr2_231442313_CT_C	chr2_231442313_CT_C gene-level trans (FDR5%) in monocyte IFNg_24h	gene-level	gene-level	CL_0002057_IFNg_24h	19	FALSE
chr2_235336716_GA_GAA	Cluster_5687_funcExplorer_integrated	funcExplorer	integrated	CL_0002057_LPS_24h	12	TRUE
chr2_235336716_GA_GAA	chr2_235336716_GA_GAA gene-level trans (FDR5%) in monocyte LPS_24h	gene-level	gene-level	CL_0002057_LPS_24h	432	TRUE
chr2_24200207_G_T	MEplum1_WGCNA_separate_CL_0000775_naive	WGCNA	separate	CL_0000775_naive	36	TRUE
chr2_24200207_G_T	chr2_24200207_G_T gene-level trans (FDR5%) in neutrophil naive	gene-level	gene-level	CL_0000775_naive	393	TRUE
chr2_24200207_G_T	chr2_24200207_G_T gene-level trans (FDR5%) in monocyte naive	gene-level	gene-level	CL_0002057_naive	8	TRUE
chr2_24356202_C_CA	IC11_ICA_separate_CL_0000625_naive	ICA	separate	CL_0000625_naive	1117	TRUE
chr2_24356202_C_CA	X29.GSE2706_UNSTIM_VS_2H_LPS_AND_R848_DC_UP_PLIER_separate_CL_0000625_naive	PLIER	separate	CL_0000625_naive	844	TRUE
chr2_24356202_C_CA	chr2_24356202_C_CA gene-level trans (FDR5%) in CD8+ T cell naive	gene-level	gene-level	CL_0000625_naive	111	TRUE
chr2_24356202_C_CA	chr2_24356202_C_CA gene-level trans (FDR5%) in CD4+ T cell naive	gene-level	gene-level	CL_0000624_naive	17	TRUE
chr2_2515749_C_T	F26_PEER_integrated	PEER	integrated	CL_0000625_naive	1009	TRUE
chr2_2515749_C_T	chr2_2515749_C_T gene-level trans (FDR5%) in CD8+ T cell naive	gene-level	gene-level	CL_0000625_naive	51	TRUE
chr2_3180579_G_A	X11.DMAP_BCELLA1_PLIER_separate_CL_0000236_naive	PLIER	separate	CL_0000236_naive	904	TRUE
chr2_3180579_G_A	chr2_3180579_G_A gene-level trans (FDR5%) in B cell naive	gene-level	gene-level	CL_0000236_naive	63	TRUE
chr2_35434240_A_T	Cluster_54_funcExplorer_separate_CL_0002057_IFNg_24h	funcExplorer	separate	CL_0002057_IFNg_24h	960	TRUE
chr2_35434240_A_T	chr2_35434240_A_T gene-level trans (FDR5%) in monocyte IFNg_24h	gene-level	gene-level	CL_0002057_IFNg_24h	48	FALSE
chr2_35434240_A_T	chr2_35434240_A_T gene-level trans (FDR5%) in neutrophil naive	gene-level	gene-level	CL_0000775_naive	1	FALSE
chr2_44181781_C_G	IC120_ICA_integrated	ICA	integrated	CL_0000775_naive	877	TRUE
chr2_44181781_C_G	chr2_44181781_C_G gene-level trans (FDR5%) in neutrophil naive	gene-level	gene-level	CL_0000775_naive	172	TRUE
chr2_44181781_C_G	chr2_44181781_C_G gene-level trans (FDR5%) in monocyte LPS_24h	gene-level	gene-level	CL_0002057_LPS_24h	1	TRUE
chr2_45750437_A_G	F9_PEER_separate_CL_0000625_naive	PEER	separate	CL_0000625_naive	1041	TRUE
chr2_45750437_A_G	chr2_45750437_A_G gene-level trans (FDR5%) in CD4+ T cell naive	gene-level	gene-level	CL_0000624_naive	117	TRUE
chr2_45750437_A_G	chr2_45750437_A_G gene-level trans (FDR5%) in CD8+ T cell naive	gene-level	gene-level	CL_0000625_naive	120	TRUE
chr2_46080333_T_TA	Cluster_4925_funcExplorer_separate_CL_0002057_naive	funcExplorer	separate	CL_0002057_naive	5	TRUE
chr2_46080333_T_TA	chr2_46080333_T_TA gene-level trans (FDR5%) in monocyte naive	gene-level	gene-level	CL_0002057_naive	567	TRUE
chr2_46268606_A_G	Cluster_13962_funcExplorer_separate_CL_0000775_naive	funcExplorer	separate	CL_0000775_naive	22	TRUE
chr2_46268606_A_G	chr2_46268606_A_G gene-level trans (FDR5%) in neutrophil naive	gene-level	gene-level	CL_0000775_naive	460	TRUE
chr2_54918863_G_C	X20.FAELT_B_CLL_WITH_VH3_21_UP_PLIER_separate_CL_0002057_LPS_24h	PLIER	separate	CL_0002057_LPS_24h	889	TRUE
chr2_54918863_G_C	chr2_54918863_G_C gene-level trans (FDR5%) in monocyte LPS_24h	gene-level	gene-level	CL_0002057_LPS_24h	1062	TRUE
chr2_54918863_G_C	chr2_54918863_G_C gene-level trans (FDR5%) in monocyte IFNg_24h	gene-level	gene-level	CL_0002057_IFNg_24h	1	FALSE
chr2_57646840_T_C	Cluster_10032_funcExplorer_separate_CL_0000625_naive	funcExplorer	separate	CL_0000625_naive	10	TRUE
chr2_57646840_T_C	chr2_57646840_T_C gene-level trans (FDR5%) in CD8+ T cell naive	gene-level	gene-level	CL_0000625_naive	3	TRUE
chr2_57646840_T_C	chr2_57646840_T_C gene-level trans (FDR5%) in B cell naive	gene-level	gene-level	CL_0000236_naive	1	TRUE
chr2_61277281_G_C	Cluster_16803_funcExplorer_integrated	funcExplorer	integrated	CL_0000624_naive	10	TRUE
chr2_61277281_G_C	chr2_61277281_G_C gene-level trans (FDR5%) in CD8+ T cell naive	gene-level	gene-level	CL_0000625_naive	892	TRUE
chr2_61277281_G_C	chr2_61277281_G_C gene-level trans (FDR5%) in CD4+ T cell naive	gene-level	gene-level	CL_0000624_naive	165	TRUE
chr20_12003012_C_T	F22_PEER_integrated	PEER	integrated	CL_0000775_naive	1095	TRUE
chr20_12003012_C_T	chr20_12003012_C_T gene-level trans (FDR5%) in neutrophil naive	gene-level	gene-level	CL_0000775_naive	226	TRUE
chr20_22501008_T_C	F2_PEER_integrated	PEER	integrated	CL_0000625_naive	839	TRUE
chr20_22501008_T_C	Cluster_3445_funcExplorer_separate_CL_0000625_naive	funcExplorer	separate	CL_0000625_naive	26	TRUE
chr20_22501008_T_C	chr20_22501008_T_C gene-level trans (FDR5%) in CD8+ T cell naive	gene-level	gene-level	CL_0000625_naive	3494	TRUE
chr20_40080805_C_T	X32.MUELLER_COMMON_TARGETS_OF_AML_FUSIONS_UP_PLIER_separate_CL_0002057_LPS_2h	PLIER	separate	CL_0002057_LPS_2h	942	TRUE
chr20_40080805_C_T	chr20_40080805_C_T gene-level trans (FDR5%) in monocyte LPS_2h	gene-level	gene-level	CL_0002057_LPS_2h	439	TRUE
chr20_40080805_C_T	chr20_40080805_C_T gene-level trans (FDR5%) in monocyte naive	gene-level	gene-level	CL_0002057_naive	1	TRUE
chr20_50452363_C_T	LV.45_PLIER_separate_CL_0002057_naive	PLIER	separate	CL_0002057_naive	842	TRUE
chr20_50452363_C_T	chr20_50452363_C_T gene-level trans (FDR5%) in monocyte naive	gene-level	gene-level	CL_0002057_naive	285	TRUE
chr20_5693855_T_TTTTG	Cluster_6703_funcExplorer_integrated	funcExplorer	integrated	CL_0002057_IFNg_24h	130	TRUE
chr20_5693855_T_TTTTG	F12_PEER_integrated	PEER	integrated	CL_0002057_IFNg_24h	897	TRUE
chr20_5693855_T_TTTTG	chr20_5693855_T_TTTTG gene-level trans (FDR5%) in monocyte naive	gene-level	gene-level	CL_0002057_naive	51	FALSE
chr20_5693855_T_TTTTG	chr20_5693855_T_TTTTG gene-level trans (FDR5%) in monocyte IFNg_24h	gene-level	gene-level	CL_0002057_IFNg_24h	29	FALSE
chr20_57460756_C_T	Cluster_17756_funcExplorer_separate_CL_0002057_LPS_2h	funcExplorer	separate	CL_0002057_LPS_2h	8	TRUE
chr20_57460756_C_T	chr20_57460756_C_T gene-level trans (FDR5%) in monocyte LPS_2h	gene-level	gene-level	CL_0002057_LPS_2h	208	TRUE
chr20_9641942_T_C	IC39_ICA_integrated	ICA	integrated	CL_0000625_naive	1109	TRUE
chr20_9641942_T_C	chr20_9641942_T_C gene-level trans (FDR5%) in CD8+ T cell naive	gene-level	gene-level	CL_0000625_naive	197	TRUE
chr20_9641942_T_C	chr20_9641942_T_C gene-level trans (FDR5%) in CD4+ T cell naive	gene-level	gene-level	CL_0000624_naive	35	FALSE
chr20_9641942_T_C	chr20_9641942_T_C gene-level trans (FDR5%) in monocyte naive	gene-level	gene-level	CL_0002057_naive	1	FALSE
chr21_16668006_G_A	Cluster_16165_funcExplorer_separate_CL_0002057_LPS_2h	funcExplorer	separate	CL_0002057_LPS_2h	25	TRUE
chr21_16668006_G_A	chr21_16668006_G_A gene-level trans (FDR5%) in monocyte LPS_2h	gene-level	gene-level	CL_0002057_LPS_2h	537	TRUE
chr21_16710053_C_CA	X22.PYEON_CANCER_HEAD_AND_NECK_VS_CERVICAL_DN_PLIER_integrated	PLIER	integrated	CL_0002057_LPS_2h	235	TRUE
chr21_16710053_C_CA	chr21_16710053_C_CA gene-level trans (FDR5%) in platelet naive	gene-level	gene-level	CL_0000233_naive	2	FALSE
chr21_16710053_C_CA	chr21_16710053_C_CA gene-level trans (FDR5%) in monocyte LPS_2h	gene-level	gene-level	CL_0002057_LPS_2h	1	FALSE
chr21_18390517_G_A	X23.BIOCARTA_KERATINOCYTE_PATHWAY_PLIER_separate_CL_0000236_naive	PLIER	separate	CL_0000236_naive	891	TRUE
chr21_18390517_G_A	chr21_18390517_G_A gene-level trans (FDR5%) in B cell naive	gene-level	gene-level	CL_0000236_naive	158	TRUE
chr21_18390517_G_A	chr21_18390517_G_A gene-level trans (FDR5%) in neutrophil naive	gene-level	gene-level	CL_0000775_naive	189	TRUE
chr21_18390517_G_A	chr21_18390517_G_A gene-level trans (FDR5%) in CD4+ T cell naive	gene-level	gene-level	CL_0000624_naive	11	FALSE
chr21_32468022_A_G	Cluster_6079_funcExplorer_separate_CL_0000624_naive	funcExplorer	separate	CL_0000624_naive	5	TRUE
chr21_32468022_A_G	chr21_32468022_A_G gene-level trans (FDR5%) in CD4+ T cell naive	gene-level	gene-level	CL_0000624_naive	2	FALSE
chr22_17636750_C_T	F9_PEER_separate_CL_0002057_LPS_2h	PEER	separate	CL_0002057_LPS_2h	1018	TRUE
chr22_17636750_C_T	chr22_17636750_C_T gene-level trans (FDR5%) in monocyte LPS_2h	gene-level	gene-level	CL_0002057_LPS_2h	42	TRUE
chr22_25537151_T_G	MEviolet_WGCNA_integrated	WGCNA	integrated	CL_0000624_naive	75	TRUE
chr22_25537151_T_G	MEdarkorange_WGCNA_separate_CL_0000624_naive	WGCNA	separate	CL_0000624_naive	99	TRUE
chr22_25537151_T_G	MEmediumpurple3_WGCNA_separate_CL_0000624_naive	WGCNA	separate	CL_0000624_naive	66	TRUE
chr22_25537151_T_G	chr22_25537151_T_G gene-level trans (FDR5%) in CD4+ T cell naive	gene-level	gene-level	CL_0000624_naive	887	TRUE
chr22_25537151_T_G	chr22_25537151_T_G gene-level trans (FDR5%) in CD8+ T cell naive	gene-level	gene-level	CL_0000625_naive	14	TRUE
chr22_25675591_G_A	F1_PEER_integrated	PEER	integrated	CL_0000775_naive	864	TRUE
chr22_25675591_G_A	chr22_25675591_G_A gene-level trans (FDR5%) in neutrophil naive	gene-level	gene-level	CL_0000775_naive	260	FALSE
chr22_39758871_A_T	MEgreen_WGCNA_integrated	WGCNA	integrated	CL_0000236_naive	681	TRUE
chr22_39758871_A_T	Cluster_8766_funcExplorer_integrated	funcExplorer	integrated	CL_0000236_naive	9	TRUE
chr22_39758871_A_T	chr22_39758871_A_T gene-level trans (FDR5%) in B cell naive	gene-level	gene-level	CL_0000236_naive	330	TRUE
chr22_39758871_A_T	chr22_39758871_A_T gene-level trans (FDR5%) in neutrophil naive	gene-level	gene-level	CL_0000775_naive	1	FALSE
chr22_42375511_T_C	F2_PEER_separate_CL_0002057_LPS_2h	PEER	separate	CL_0002057_LPS_2h	1351	TRUE
chr22_42375511_T_C	chr22_42375511_T_C gene-level trans (FDR5%) in monocyte LPS_2h	gene-level	gene-level	CL_0002057_LPS_2h	693	TRUE
chr22_44723779_G_A	Cluster_8104_funcExplorer_separate_CL_0000233_naive	funcExplorer	separate	CL_0000233_naive	18	TRUE
chr22_44723779_G_A	chr22_44723779_G_A gene-level trans (FDR5%) in platelet naive	gene-level	gene-level	CL_0000233_naive	2	FALSE
chr22_48286796_C_G	Cluster_11106_funcExplorer_integrated	funcExplorer	integrated	CL_0000775_naive	22	TRUE
chr22_48286796_C_G	chr22_48286796_C_G gene-level trans (FDR5%) in neutrophil naive	gene-level	gene-level	CL_0000775_naive	85	TRUE
chr3_10334133_G_A	Cluster_13700_funcExplorer_separate_CL_0002057_LPS_24h	funcExplorer	separate	CL_0002057_LPS_24h	6	TRUE
chr3_10334133_G_A	chr3_10334133_G_A gene-level trans (FDR5%) in monocyte LPS_24h	gene-level	gene-level	CL_0002057_LPS_24h	564	TRUE
chr3_105575690_A_G	MEbisque4_WGCNA_integrated	WGCNA	integrated	CL_0002057_naive	41	TRUE
chr3_105575690_A_G	chr3_105575690_A_G gene-level trans (FDR5%) in monocyte naive	gene-level	gene-level	CL_0002057_naive	1542	TRUE
chr3_107449355_T_C	IC115_ICA_integrated	ICA	integrated	CL_0002057_LPS_24h	806	TRUE
chr3_107449355_T_C	chr3_107449355_T_C gene-level trans (FDR5%) in monocyte LPS_24h	gene-level	gene-level	CL_0002057_LPS_24h	1296	TRUE
chr3_128430549_C_A	Cluster_2905_funcExplorer_integrated	funcExplorer	integrated	CL_0000775_naive	14	TRUE
chr3_128430549_C_A	Cluster_10054_funcExplorer_separate_CL_0000775_naive	funcExplorer	separate	CL_0000775_naive	54	TRUE
chr3_128430549_C_A	chr3_128430549_C_A gene-level trans (FDR5%) in neutrophil naive	gene-level	gene-level	CL_0000775_naive	614	TRUE
chr3_153343091_T_TA	IC66_ICA_integrated	ICA	integrated	CL_0002057_naive	592	TRUE
chr3_153343091_T_TA	X30.KANG_FLUOROURACIL_RESISTANCE_DN_PLIER_integrated	PLIER	integrated	CL_0002057_naive	584	TRUE
chr3_153343091_T_TA	chr3_153343091_T_TA gene-level trans (FDR5%) in monocyte naive	gene-level	gene-level	CL_0002057_naive	4	FALSE
chr3_155314905_CT_C	X13.GSE29617_CTRL_VS_DAY3_TIV_FLU_VACCINE_PBMC_2008_UP_PLIER_separate_CL_0000624_naive	PLIER	separate	CL_0000624_naive	941	TRUE
chr3_155314905_CT_C	chr3_155314905_CT_C gene-level trans (FDR5%) in CD4+ T cell naive	gene-level	gene-level	CL_0000624_naive	4	TRUE
chr3_158994268_A_G	Cluster_831_funcExplorer_separate_CL_0002057_IFNg_24h	funcExplorer	separate	CL_0002057_IFNg_24h	5	TRUE
chr3_158994268_A_G	chr3_158994268_A_G gene-level trans (FDR5%) in monocyte IFNg_24h	gene-level	gene-level	CL_0002057_IFNg_24h	2	TRUE
chr3_158994268_A_G	chr3_158994268_A_G gene-level trans (FDR5%) in monocyte LPS_24h	gene-level	gene-level	CL_0002057_LPS_24h	1	TRUE
chr3_171120469_T_C	Cluster_17996_funcExplorer_integrated	funcExplorer	integrated	CL_0000233_naive	234	TRUE
chr3_171120469_T_C	F2_PEER_integrated	PEER	integrated	CL_0000233_naive	839	TRUE
chr3_171120469_T_C	chr3_171120469_T_C gene-level trans (FDR5%) in platelet naive	gene-level	gene-level	CL_0000233_naive	1319	TRUE
chr3_192835271_G_A	F39_PEER_integrated	PEER	integrated	CL_0002057_IFNg_24h	916	TRUE
chr3_192835271_G_A	MEwhite_WGCNA_integrated	WGCNA	integrated	CL_0002057_IFNg_24h	92	FALSE
chr3_192835271_G_A	chr3_192835271_G_A gene-level trans (FDR5%) in monocyte IFNg_24h	gene-level	gene-level	CL_0002057_IFNg_24h	541	TRUE
chr3_192835271_G_A	chr3_192835271_G_A gene-level trans (FDR5%) in monocyte LPS_24h	gene-level	gene-level	CL_0002057_LPS_24h	2	FALSE
chr3_29833800_C_A	IC88_ICA_separate_CL_0000233_naive	ICA	separate	CL_0000233_naive	900	TRUE
chr3_29833800_C_A	chr3_29833800_C_A gene-level trans (FDR5%) in platelet naive	gene-level	gene-level	CL_0000233_naive	1	FALSE
chr3_38216688_T_C	Cluster_13138_funcExplorer_separate_CL_0002057_LPS_2h	funcExplorer	separate	CL_0002057_LPS_2h	8	TRUE
chr3_38216688_T_C	chr3_38216688_T_C gene-level trans (FDR5%) in monocyte LPS_2h	gene-level	gene-level	CL_0002057_LPS_2h	60	TRUE
chr3_44465065_TA_T	MEpink_WGCNA_integrated	WGCNA	integrated	CL_0002057_LPS_2h	342	TRUE
chr3_44465065_TA_T	MEdarkred_WGCNA_integrated	WGCNA	integrated	CL_0002057_LPS_2h	151	TRUE
chr3_44465065_TA_T	chr3_44465065_TA_T gene-level trans (FDR5%) in monocyte LPS_2h	gene-level	gene-level	CL_0002057_LPS_2h	321	TRUE
chr3_54661736_A_G	IC86_ICA_integrated	ICA	integrated	CL_0000625_naive	309	TRUE
chr3_54661736_A_G	IC49_ICA_separate_CL_0000625_naive	ICA	separate	CL_0000625_naive	453	TRUE
chr3_54661736_A_G	chr3_54661736_A_G gene-level trans (FDR5%) in CD4+ T cell naive	gene-level	gene-level	CL_0000624_naive	423	TRUE
chr3_54661736_A_G	chr3_54661736_A_G gene-level trans (FDR5%) in CD8+ T cell naive	gene-level	gene-level	CL_0000625_naive	752	TRUE
chr3_56815721_T_C	IC68_ICA_integrated	ICA	integrated	CL_0000233_naive	1074	FALSE
chr3_56815721_T_C	X6.WIERENGA_STAT5A_TARGETS_DN_PLIER_separate_CL_0000233_naive	PLIER	separate	CL_0000233_naive	918	TRUE
chr3_56815721_T_C	Cluster_12953_funcExplorer_separate_CL_0000233_naive	funcExplorer	separate	CL_0000233_naive	5	TRUE
chr3_56815721_T_C	chr3_56815721_T_C gene-level trans (FDR5%) in platelet naive	gene-level	gene-level	CL_0000233_naive	285	TRUE
chr3_56815721_T_C	chr3_56815721_T_C gene-level trans (FDR5%) in monocyte naive	gene-level	gene-level	CL_0002057_naive	1	FALSE
chr3_56815721_T_C	chr3_56815721_T_C gene-level trans (FDR5%) in monocyte LPS_24h	gene-level	gene-level	CL_0002057_LPS_24h	1	FALSE
chr3_56897113_C_T	IC20_ICA_integrated	ICA	integrated	CL_0000775_naive	825	FALSE
chr3_56897113_C_T	chr3_56897113_C_T gene-level trans (FDR5%) in neutrophil naive	gene-level	gene-level	CL_0000775_naive	147	TRUE
chr3_57319743_A_AT	X59.KEGG_PROPANOATE_METABOLISM_PLIER_integrated	PLIER	integrated	CL_0002057_naive	874	TRUE
chr3_57319743_A_AT	chr3_57319743_A_AT gene-level trans (FDR5%) in monocyte naive	gene-level	gene-level	CL_0002057_naive	49	TRUE
chr3_60142694_CT_C	Cluster_11701_funcExplorer_separate_CL_0002057_LPS_2h	funcExplorer	separate	CL_0002057_LPS_2h	7	TRUE
chr3_60142694_CT_C	chr3_60142694_CT_C gene-level trans (FDR5%) in monocyte LPS_2h	gene-level	gene-level	CL_0002057_LPS_2h	714	TRUE
chr3_63816769_C_CT	Cluster_6460_funcExplorer_integrated	funcExplorer	integrated	CL_0002057_LPS_24h	55	TRUE
chr3_63816769_C_CT	chr3_63816769_C_CT gene-level trans (FDR5%) in monocyte LPS_24h	gene-level	gene-level	CL_0002057_LPS_24h	804	TRUE
chr4_10135501_C_G	MEgreen_WGCNA_separate_CL_0002057_naive	WGCNA	separate	CL_0002057_naive	250	TRUE
chr4_10135501_C_G	IC86_ICA_integrated	ICA	integrated	CL_0002057_naive	309	TRUE
chr4_10135501_C_G	X5.LU_EZH2_TARGETS_DN_PLIER_integrated	PLIER	integrated	CL_0002057_naive	321	TRUE
chr4_10135501_C_G	MEsalmon_WGCNA_integrated	WGCNA	integrated	CL_0002057_naive	256	TRUE
chr4_10135501_C_G	F41_PEER_integrated	PEER	integrated	CL_0002057_naive	933	TRUE
chr4_10135501_C_G	F29_PEER_integrated	PEER	integrated	CL_0002057_naive	1018	TRUE
chr4_10135501_C_G	chr4_10135501_C_G gene-level trans (FDR5%) in monocyte naive	gene-level	gene-level	CL_0002057_naive	176	TRUE
chr4_10135501_C_G	chr4_10135501_C_G gene-level trans (FDR5%) in B cell naive	gene-level	gene-level	CL_0000236_naive	8	FALSE
chr4_10135501_C_G	chr4_10135501_C_G gene-level trans (FDR5%) in neutrophil naive	gene-level	gene-level	CL_0000775_naive	1	FALSE
chr4_102325419_ACACT_A	Cluster_10413_funcExplorer_separate_CL_0002057_LPS_24h	funcExplorer	separate	CL_0002057_LPS_24h	5	TRUE
chr4_102325419_ACACT_A	chr4_102325419_ACACT_A gene-level trans (FDR5%) in monocyte LPS_24h	gene-level	gene-level	CL_0002057_LPS_24h	7	TRUE
chr4_130320342_T_C	Cluster_16424_funcExplorer_integrated	funcExplorer	integrated	CL_0000233_naive	11	TRUE
chr4_130320342_T_C	chr4_130320342_T_C gene-level trans (FDR5%) in platelet naive	gene-level	gene-level	CL_0000233_naive	80	TRUE
chr4_130320342_T_C	chr4_130320342_T_C gene-level trans (FDR5%) in monocyte LPS_2h	gene-level	gene-level	CL_0002057_LPS_2h	1	TRUE
chr4_148925397_GA_G	Cluster_8551_funcExplorer_separate_CL_0002057_LPS_2h	funcExplorer	separate	CL_0002057_LPS_2h	5	TRUE
chr4_148925397_GA_G	chr4_148925397_GA_G gene-level trans (FDR5%) in monocyte LPS_2h	gene-level	gene-level	CL_0002057_LPS_2h	65	TRUE
chr4_148925397_GA_G	chr4_148925397_GA_G gene-level trans (FDR5%) in monocyte IFNg_24h	gene-level	gene-level	CL_0002057_IFNg_24h	1	FALSE
chr4_175211193_G_GACACA	IC48_ICA_integrated	ICA	integrated	CL_0000624_naive	892	TRUE
chr4_175211193_G_GACACA	chr4_175211193_G_GACACA gene-level trans (FDR5%) in CD4+ T cell naive	gene-level	gene-level	CL_0000624_naive	680	TRUE
chr4_189096487_G_C	Cluster_11923_funcExplorer_separate_CL_0000625_naive	funcExplorer	separate	CL_0000625_naive	6	TRUE
chr4_189096487_G_C	chr4_189096487_G_C gene-level trans (FDR5%) in CD8+ T cell naive	gene-level	gene-level	CL_0000625_naive	89	TRUE
chr4_38413905_TA_T	MEdarkgrey_WGCNA_integrated	WGCNA	integrated	CL_0002057_IFNg_24h	136	TRUE
chr4_38413905_TA_T	chr4_38413905_TA_T gene-level trans (FDR5%) in monocyte IFNg_24h	gene-level	gene-level	CL_0002057_IFNg_24h	790	TRUE
chr4_47001543_G_A	X29.GSE29617_CTRL_VS_DAY3_TIV_FLU_VACCINE_PBMC_2008_UP_PLIER_integrated	PLIER	integrated	CL_0000625_naive	849	TRUE
chr4_47001543_G_A	IC170_ICA_integrated	ICA	integrated	CL_0000625_naive	1018	TRUE
chr4_47001543_G_A	MEbisque4_WGCNA_separate_CL_0000625_naive	WGCNA	separate	CL_0000625_naive	58	TRUE
chr4_47001543_G_A	IC75_ICA_separate_CL_0000625_naive	ICA	separate	CL_0000625_naive	1229	TRUE
chr4_47001543_G_A	chr4_47001543_G_A gene-level trans (FDR5%) in CD8+ T cell naive	gene-level	gene-level	CL_0000625_naive	900	TRUE
chr4_47001543_G_A	chr4_47001543_G_A gene-level trans (FDR5%) in CD4+ T cell naive	gene-level	gene-level	CL_0000624_naive	170	TRUE
chr4_4813315_C_CA	Cluster_1203_funcExplorer_separate_CL_0000236_naive	funcExplorer	separate	CL_0000236_naive	10	TRUE
chr4_4813315_C_CA	chr4_4813315_C_CA gene-level trans (FDR5%) in B cell naive	gene-level	gene-level	CL_0000236_naive	198	TRUE
chr4_4813315_C_CA	chr4_4813315_C_CA gene-level trans (FDR5%) in CD8+ T cell naive	gene-level	gene-level	CL_0000625_naive	1	FALSE
chr4_4813315_C_CA	chr4_4813315_C_CA gene-level trans (FDR5%) in CD4+ T cell naive	gene-level	gene-level	CL_0000624_naive	1	FALSE
chr4_59610238_G_A	Cluster_3954_funcExplorer_separate_CL_0000625_naive	funcExplorer	separate	CL_0000625_naive	6	TRUE
chr4_59610238_G_A	chr4_59610238_G_A gene-level trans (FDR5%) in CD8+ T cell naive	gene-level	gene-level	CL_0000625_naive	324	TRUE
chr4_59610238_G_A	chr4_59610238_G_A gene-level trans (FDR5%) in platelet naive	gene-level	gene-level	CL_0000233_naive	2	TRUE
chr4_7359313_C_CA	IC163_ICA_integrated	ICA	integrated	CL_0002057_naive	933	TRUE
chr4_7359313_C_CA	chr4_7359313_C_CA gene-level trans (FDR5%) in monocyte naive	gene-level	gene-level	CL_0002057_naive	185	TRUE
chr4_7359313_C_CA	chr4_7359313_C_CA gene-level trans (FDR5%) in monocyte LPS_2h	gene-level	gene-level	CL_0002057_LPS_2h	1	FALSE
chr4_74865211_TG_T	Cluster_10875_funcExplorer_separate_CL_0000625_naive	funcExplorer	separate	CL_0000625_naive	14	TRUE
chr4_74865211_TG_T	chr4_74865211_TG_T gene-level trans (FDR5%) in CD8+ T cell naive	gene-level	gene-level	CL_0000625_naive	6	FALSE
chr5_103601008_C_T	X38.GSE14000_TRANSLATED_RNA_VS_MRNA_4H_LPS_DC_UP_PLIER_integrated	PLIER	integrated	CL_0000233_naive	887	TRUE
chr5_103601008_C_T	chr5_103601008_C_T gene-level trans (FDR5%) in platelet naive	gene-level	gene-level	CL_0000233_naive	73	FALSE
chr5_116539567_C_T	MEplum1_WGCNA_integrated	WGCNA	integrated	CL_0002057_IFNg_24h	63	TRUE
chr5_116539567_C_T	chr5_116539567_C_T gene-level trans (FDR5%) in monocyte IFNg_24h	gene-level	gene-level	CL_0002057_IFNg_24h	610	TRUE
chr5_151750509_C_CA	IC140_ICA_integrated	ICA	integrated	CL_0000624_naive	445	TRUE
chr5_151750509_C_CA	chr5_151750509_C_CA gene-level trans (FDR5%) in monocyte LPS_2h	gene-level	gene-level	CL_0002057_LPS_2h	1	FALSE
chr5_151750509_C_CA	chr5_151750509_C_CA gene-level trans (FDR5%) in CD4+ T cell naive	gene-level	gene-level	CL_0000624_naive	3	TRUE
chr5_166434137_G_A	X46.CUI_GLUCOSE_DEPRIVATION_PLIER_integrated	PLIER	integrated	CL_0002057_LPS_24h	706	TRUE
chr5_166434137_G_A	chr5_166434137_G_A gene-level trans (FDR5%) in monocyte LPS_24h	gene-level	gene-level	CL_0002057_LPS_24h	32	TRUE
chr5_166434137_G_A	chr5_166434137_G_A gene-level trans (FDR5%) in monocyte LPS_2h	gene-level	gene-level	CL_0002057_LPS_2h	1	FALSE
chr5_172450134_T_C	MElightcyan_WGCNA_integrated	WGCNA	integrated	CL_0002057_LPS_24h	204	TRUE
chr5_172450134_T_C	chr5_172450134_T_C gene-level trans (FDR5%) in monocyte LPS_24h	gene-level	gene-level	CL_0002057_LPS_24h	1140	TRUE
chr5_18945545_G_A	X27.GSE9006_TYPE_1_VS_TYPE_2_DIABETES_PBMC_AT_DX_UP_PLIER_integrated	PLIER	integrated	CL_0002057_LPS_2h	678	TRUE
chr5_18945545_G_A	chr5_18945545_G_A gene-level trans (FDR5%) in monocyte LPS_2h	gene-level	gene-level	CL_0002057_LPS_2h	45	TRUE
chr5_22808762_GT_G	F3_PEER_separate_CL_0002057_LPS_2h	PEER	separate	CL_0002057_LPS_2h	1241	TRUE
chr5_22808762_GT_G	chr5_22808762_GT_G gene-level trans (FDR5%) in monocyte LPS_2h	gene-level	gene-level	CL_0002057_LPS_2h	816	TRUE
chr5_2754675_A_G	Cluster_7084_funcExplorer_integrated	funcExplorer	integrated	CL_0000624_naive	20	TRUE
chr5_2754675_A_G	Cluster_14064_funcExplorer_separate_CL_0000624_naive	funcExplorer	separate	CL_0000624_naive	37	TRUE
chr5_2754675_A_G	chr5_2754675_A_G gene-level trans (FDR5%) in CD4+ T cell naive	gene-level	gene-level	CL_0000624_naive	2230	TRUE
chr5_29539468_A_G	X22.PYEON_CANCER_HEAD_AND_NECK_VS_CERVICAL_DN_PLIER_integrated	PLIER	integrated	CL_0000624_naive	235	TRUE
chr5_29539468_A_G	chr5_29539468_A_G gene-level trans (FDR5%) in CD4+ T cell naive	gene-level	gene-level	CL_0000624_naive	8	TRUE
chr5_29539468_A_G	chr5_29539468_A_G gene-level trans (FDR5%) in CD8+ T cell naive	gene-level	gene-level	CL_0000625_naive	3	FALSE
chr5_3219858_T_C	F6_PEER_separate_CL_0000236_naive	PEER	separate	CL_0000236_naive	1169	TRUE
chr5_3219858_T_C	chr5_3219858_T_C gene-level trans (FDR5%) in B cell naive	gene-level	gene-level	CL_0000236_naive	2	FALSE
chr5_3658163_G_GT	F28_PEER_integrated	PEER	integrated	CL_0000624_naive	908	TRUE
chr5_3658163_G_GT	chr5_3658163_G_GT gene-level trans (FDR5%) in CD4+ T cell naive	gene-level	gene-level	CL_0000624_naive	12	FALSE
chr5_3658163_G_GT	chr5_3658163_G_GT gene-level trans (FDR5%) in CD8+ T cell naive	gene-level	gene-level	CL_0000625_naive	8	TRUE
chr5_3658163_G_GT	chr5_3658163_G_GT gene-level trans (FDR5%) in neutrophil naive	gene-level	gene-level	CL_0000775_naive	1	FALSE
chr5_57611819_AT_A	F3_PEER_integrated	PEER	integrated	CL_0000625_naive	1349	TRUE
chr5_57611819_AT_A	chr5_57611819_AT_A gene-level trans (FDR5%) in CD8+ T cell naive	gene-level	gene-level	CL_0000625_naive	1951	TRUE
chr5_57611819_AT_A	chr5_57611819_AT_A gene-level trans (FDR5%) in monocyte IFNg_24h	gene-level	gene-level	CL_0002057_IFNg_24h	1	FALSE
chr5_74445845_AG_A	X2.GSE22886_NAIVE_BCELL_VS_NEUTROPHIL_DN_PLIER_separate_CL_0000233_naive	PLIER	separate	CL_0000233_naive	822	TRUE
chr5_74445845_AG_A	chr5_74445845_AG_A gene-level trans (FDR5%) in neutrophil naive	gene-level	gene-level	CL_0000775_naive	695	TRUE
chr5_74445845_AG_A	chr5_74445845_AG_A gene-level trans (FDR5%) in platelet naive	gene-level	gene-level	CL_0000233_naive	727	TRUE
chr5_77996890_T_C	MElightsteelblue1_WGCNA_integrated	WGCNA	integrated	CL_0000625_naive	54	TRUE
chr5_77996890_T_C	chr5_77996890_T_C gene-level trans (FDR5%) in CD8+ T cell naive	gene-level	gene-level	CL_0000625_naive	3144	TRUE
chr6_116232159_C_CTG	X58.GSE1432_CTRL_VS_IFNG_24H_MICROGLIA_DN_PLIER_integrated	PLIER	integrated	CL_0002057_IFNg_24h	890	TRUE
chr6_116232159_C_CTG	chr6_116232159_C_CTG gene-level trans (FDR5%) in monocyte IFNg_24h	gene-level	gene-level	CL_0002057_IFNg_24h	133	TRUE
chr6_12155416_C_T	IC95_ICA_integrated	ICA	integrated	CL_0002057_LPS_24h	915	TRUE
chr6_12155416_C_T	chr6_12155416_C_T gene-level trans (FDR5%) in monocyte LPS_24h	gene-level	gene-level	CL_0002057_LPS_24h	478	TRUE
chr6_12155416_C_T	chr6_12155416_C_T gene-level trans (FDR5%) in monocyte LPS_2h	gene-level	gene-level	CL_0002057_LPS_2h	1	FALSE
chr6_12155416_C_T	chr6_12155416_C_T gene-level trans (FDR5%) in monocyte IFNg_24h	gene-level	gene-level	CL_0002057_IFNg_24h	34	TRUE
chr6_137427712_A_G	Cluster_8412_funcExplorer_separate_CL_0002057_IFNg_24h	funcExplorer	separate	CL_0002057_IFNg_24h	9	TRUE
chr6_137427712_A_G	chr6_137427712_A_G gene-level trans (FDR5%) in monocyte IFNg_24h	gene-level	gene-level	CL_0002057_IFNg_24h	1	FALSE
chr6_138629388_TC_T	F22_PEER_integrated	PEER	integrated	CL_0000624_naive	1095	TRUE
chr6_138629388_TC_T	F22_PEER_integrated	PEER	integrated	CL_0000625_naive	1095	TRUE
chr6_138629388_TC_T	chr6_138629388_TC_T gene-level trans (FDR5%) in CD8+ T cell naive	gene-level	gene-level	CL_0000625_naive	62	TRUE
chr6_138629388_TC_T	chr6_138629388_TC_T gene-level trans (FDR5%) in CD4+ T cell naive	gene-level	gene-level	CL_0000624_naive	7	FALSE
chr6_148287702_T_G	Cluster_16628_funcExplorer_separate_CL_0002057_naive	funcExplorer	separate	CL_0002057_naive	12	TRUE
chr6_148287702_T_G	chr6_148287702_T_G gene-level trans (FDR5%) in monocyte naive	gene-level	gene-level	CL_0002057_naive	62	TRUE
chr6_158442798_C_T	F3_PEER_separate_CL_0000624_naive	PEER	separate	CL_0000624_naive	1194	TRUE
chr6_158442798_C_T	Cluster_12074_funcExplorer_separate_CL_0000624_naive	funcExplorer	separate	CL_0000624_naive	8	TRUE
chr6_158442798_C_T	chr6_158442798_C_T gene-level trans (FDR5%) in CD4+ T cell naive	gene-level	gene-level	CL_0000624_naive	664	TRUE
chr6_165203893_G_A	Cluster_7084_funcExplorer_integrated	funcExplorer	integrated	CL_0000625_naive	20	TRUE
chr6_165203893_G_A	chr6_165203893_G_A gene-level trans (FDR5%) in CD8+ T cell naive	gene-level	gene-level	CL_0000625_naive	1187	TRUE
chr6_165203893_G_A	chr6_165203893_G_A gene-level trans (FDR5%) in CD4+ T cell naive	gene-level	gene-level	CL_0000624_naive	1	FALSE
chr6_165411052_C_A	Cluster_3269_funcExplorer_separate_CL_0000775_naive	funcExplorer	separate	CL_0000775_naive	10	TRUE
chr6_165411052_C_A	chr6_165411052_C_A gene-level trans (FDR5%) in neutrophil naive	gene-level	gene-level	CL_0000775_naive	11	TRUE
chr6_16566670_T_G	Cluster_11936_funcExplorer_integrated	funcExplorer	integrated	CL_0002057_IFNg_24h	22	TRUE
chr6_16566670_T_G	chr6_16566670_T_G gene-level trans (FDR5%) in monocyte IFNg_24h	gene-level	gene-level	CL_0002057_IFNg_24h	1	FALSE
chr6_20640874_G_A	MEplum1_WGCNA_separate_CL_0000775_naive	WGCNA	separate	CL_0000775_naive	36	TRUE
chr6_20640874_G_A	chr6_20640874_G_A gene-level trans (FDR5%) in neutrophil naive	gene-level	gene-level	CL_0000775_naive	391	TRUE
chr6_32543752_G_A	F77_PEER_separate_CL_0002057_IFNg_24h	PEER	separate	CL_0002057_IFNg_24h	936	TRUE
chr6_32543752_G_A	chr6_32543752_G_A gene-level trans (FDR5%) in monocyte IFNg_24h	gene-level	gene-level	CL_0002057_IFNg_24h	13	TRUE
chr6_32543752_G_A	chr6_32543752_G_A gene-level trans (FDR5%) in monocyte naive	gene-level	gene-level	CL_0002057_naive	2	TRUE
chr6_32543752_G_A	chr6_32543752_G_A gene-level trans (FDR5%) in monocyte LPS_2h	gene-level	gene-level	CL_0002057_LPS_2h	1	FALSE
chr6_32589544_C_T	F66_PEER_separate_CL_0002057_IFNg_24h	PEER	separate	CL_0002057_IFNg_24h	915	TRUE
chr6_32589544_C_T	chr6_32589544_C_T gene-level trans (FDR5%) in monocyte naive	gene-level	gene-level	CL_0002057_naive	7	TRUE
chr6_32589544_C_T	chr6_32589544_C_T gene-level trans (FDR5%) in monocyte IFNg_24h	gene-level	gene-level	CL_0002057_IFNg_24h	28	FALSE
chr6_32589544_C_T	chr6_32589544_C_T gene-level trans (FDR5%) in CD8+ T cell naive	gene-level	gene-level	CL_0000625_naive	1	FALSE
chr6_32589544_C_T	chr6_32589544_C_T gene-level trans (FDR5%) in monocyte LPS_2h	gene-level	gene-level	CL_0002057_LPS_2h	4	TRUE
chr6_32589544_C_T	chr6_32589544_C_T gene-level trans (FDR5%) in B cell naive	gene-level	gene-level	CL_0000236_naive	3	FALSE
chr6_39302702_A_C	Cluster_9998_funcExplorer_separate_CL_0000625_naive	funcExplorer	separate	CL_0000625_naive	724	TRUE
chr6_39302702_A_C	chr6_39302702_A_C gene-level trans (FDR5%) in CD8+ T cell naive	gene-level	gene-level	CL_0000625_naive	2744	TRUE
chr6_39302702_A_C	chr6_39302702_A_C gene-level trans (FDR5%) in CD4+ T cell naive	gene-level	gene-level	CL_0000624_naive	11	FALSE
chr6_39302702_A_C	chr6_39302702_A_C gene-level trans (FDR5%) in monocyte LPS_24h	gene-level	gene-level	CL_0002057_LPS_24h	2	FALSE
chr6_44900099_C_T	Cluster_2958_funcExplorer_integrated	funcExplorer	integrated	CL_0000624_naive	77	TRUE
chr6_44900099_C_T	Cluster_5016_funcExplorer_separate_CL_0000624_naive	funcExplorer	separate	CL_0000624_naive	24	TRUE
chr6_44900099_C_T	MEpaleturquoise_WGCNA_separate_CL_0000625_naive	WGCNA	separate	CL_0000625_naive	87	TRUE
chr6_44900099_C_T	F4_PEER_integrated	PEER	integrated	CL_0000624_naive	1264	TRUE
chr6_44900099_C_T	Cluster_11866_funcExplorer_separate_CL_0000624_naive	funcExplorer	separate	CL_0000624_naive	37	TRUE
chr6_44900099_C_T	MEpaleturquoise_WGCNA_separate_CL_0000624_naive	WGCNA	separate	CL_0000624_naive	92	TRUE
chr6_44900099_C_T	Cluster_3015_funcExplorer_separate_CL_0000624_naive	funcExplorer	separate	CL_0000624_naive	739	TRUE
chr6_44900099_C_T	MEgreenyellow_WGCNA_separate_CL_0000624_naive	WGCNA	separate	CL_0000624_naive	199	TRUE
chr6_44900099_C_T	Cluster_1895_funcExplorer_integrated	funcExplorer	integrated	CL_0000624_naive	257	TRUE
chr6_44900099_C_T	Cluster_3874_funcExplorer_integrated	funcExplorer	integrated	CL_0000624_naive	15	TRUE
chr6_44900099_C_T	IC103_ICA_integrated	ICA	integrated	CL_0000624_naive	886	TRUE
chr6_44900099_C_T	Cluster_2624_funcExplorer_integrated	funcExplorer	integrated	CL_0000624_naive	545	TRUE
chr6_44900099_C_T	X51.IRIS_Monocyte.Day7_PLIER_integrated	PLIER	integrated	CL_0000624_naive	1000	TRUE
chr6_44900099_C_T	IC81_ICA_integrated	ICA	integrated	CL_0000624_naive	674	TRUE
chr6_44900099_C_T	Cluster_12035_funcExplorer_separate_CL_0000624_naive	funcExplorer	separate	CL_0000624_naive	13	TRUE
chr6_44900099_C_T	chr6_44900099_C_T gene-level trans (FDR5%) in CD4+ T cell naive	gene-level	gene-level	CL_0000624_naive	1744	TRUE
chr6_44900099_C_T	chr6_44900099_C_T gene-level trans (FDR5%) in monocyte naive	gene-level	gene-level	CL_0002057_naive	1	FALSE
chr6_44900099_C_T	chr6_44900099_C_T gene-level trans (FDR5%) in CD8+ T cell naive	gene-level	gene-level	CL_0000625_naive	367	TRUE
chr6_44900099_C_T	chr6_44900099_C_T gene-level trans (FDR5%) in B cell naive	gene-level	gene-level	CL_0000236_naive	1	FALSE
chr6_65318497_T_C	Cluster_6555_funcExplorer_separate_CL_0000236_naive	funcExplorer	separate	CL_0000236_naive	5	TRUE
chr6_65318497_T_C	chr6_65318497_T_C gene-level trans (FDR5%) in B cell naive	gene-level	gene-level	CL_0000236_naive	10	TRUE
chr6_76618975_A_G	F35_PEER_integrated	PEER	integrated	CL_0000775_naive	1025	TRUE
chr6_76618975_A_G	chr6_76618975_A_G gene-level trans (FDR5%) in neutrophil naive	gene-level	gene-level	CL_0000775_naive	82	TRUE
chr6_94283151_T_C	IC92_ICA_integrated	ICA	integrated	CL_0002057_naive	764	TRUE
chr6_94283151_T_C	chr6_94283151_T_C gene-level trans (FDR5%) in monocyte naive	gene-level	gene-level	CL_0002057_naive	19	FALSE
chr7_100876212_C_T	Cluster_13468_funcExplorer_separate_CL_0002057_LPS_2h	funcExplorer	separate	CL_0002057_LPS_2h	9	TRUE
chr7_100876212_C_T	chr7_100876212_C_T gene-level trans (FDR5%) in monocyte LPS_2h	gene-level	gene-level	CL_0002057_LPS_2h	276	TRUE
chr7_129150955_A_G	F44_PEER_integrated	PEER	integrated	CL_0000775_naive	1031	TRUE
chr7_129150955_A_G	chr7_129150955_A_G gene-level trans (FDR5%) in neutrophil naive	gene-level	gene-level	CL_0000775_naive	852	TRUE
chr7_134453628_C_A	Cluster_8489_funcExplorer_separate_CL_0002057_LPS_2h	funcExplorer	separate	CL_0002057_LPS_2h	5	TRUE
chr7_134453628_C_A	chr7_134453628_C_A gene-level trans (FDR5%) in monocyte LPS_2h	gene-level	gene-level	CL_0002057_LPS_2h	13	FALSE
chr7_134453628_C_A	chr7_134453628_C_A gene-level trans (FDR5%) in monocyte LPS_24h	gene-level	gene-level	CL_0002057_LPS_24h	3	TRUE
chr7_134453628_C_A	chr7_134453628_C_A gene-level trans (FDR5%) in monocyte IFNg_24h	gene-level	gene-level	CL_0002057_IFNg_24h	2	FALSE
chr7_134453628_C_A	chr7_134453628_C_A gene-level trans (FDR5%) in B cell naive	gene-level	gene-level	CL_0000236_naive	1	FALSE
chr7_134453628_C_A	chr7_134453628_C_A gene-level trans (FDR5%) in monocyte naive	gene-level	gene-level	CL_0002057_naive	2	FALSE
chr7_136803947_CA_C	Cluster_3135_funcExplorer_integrated	funcExplorer	integrated	CL_0000624_naive	183	TRUE
chr7_136803947_CA_C	chr7_136803947_CA_C gene-level trans (FDR5%) in CD4+ T cell naive	gene-level	gene-level	CL_0000624_naive	1179	TRUE
chr7_142971391_T_A	Cluster_16716_funcExplorer_separate_CL_0000233_naive	funcExplorer	separate	CL_0000233_naive	8	TRUE
chr7_142971391_T_A	chr7_142971391_T_A gene-level trans (FDR5%) in platelet naive	gene-level	gene-level	CL_0000233_naive	248	TRUE
chr7_150783182_C_CA	X45.BERENJENO_TRANSFORMED_BY_RHOA_FOREVER_UP_PLIER_separate_CL_0002057_IFNg_24h	PLIER	separate	CL_0002057_IFNg_24h	911	TRUE
chr7_150783182_C_CA	chr7_150783182_C_CA gene-level trans (FDR5%) in B cell naive	gene-level	gene-level	CL_0000236_naive	1	TRUE
chr7_150783182_C_CA	chr7_150783182_C_CA gene-level trans (FDR5%) in monocyte naive	gene-level	gene-level	CL_0002057_naive	4	FALSE
chr7_150783182_C_CA	chr7_150783182_C_CA gene-level trans (FDR5%) in monocyte LPS_24h	gene-level	gene-level	CL_0002057_LPS_24h	3	FALSE
chr7_150783182_C_CA	chr7_150783182_C_CA gene-level trans (FDR5%) in monocyte IFNg_24h	gene-level	gene-level	CL_0002057_IFNg_24h	4	FALSE
chr7_150783182_C_CA	chr7_150783182_C_CA gene-level trans (FDR5%) in monocyte LPS_2h	gene-level	gene-level	CL_0002057_LPS_2h	2	FALSE
chr7_151407734_A_G	F19_PEER_integrated	PEER	integrated	CL_0000233_naive	1025	TRUE
chr7_151407734_A_G	chr7_151407734_A_G gene-level trans (FDR5%) in platelet naive	gene-level	gene-level	CL_0000233_naive	82	FALSE
chr7_153860444_T_G	F2_PEER_separate_CL_0002057_LPS_24h	PEER	separate	CL_0002057_LPS_24h	1282	TRUE
chr7_153860444_T_G	MEred_WGCNA_separate_CL_0002057_LPS_24h	WGCNA	separate	CL_0002057_LPS_24h	253	TRUE
chr7_153860444_T_G	chr7_153860444_T_G gene-level trans (FDR5%) in monocyte LPS_24h	gene-level	gene-level	CL_0002057_LPS_24h	1911	TRUE
chr7_16464652_TTC_T	Cluster_4514_funcExplorer_separate_CL_0000625_naive	funcExplorer	separate	CL_0000625_naive	34	TRUE
chr7_16464652_TTC_T	X22.FINETTI_BREAST_CANCERS_KINOME_GRAY_PLIER_separate_CL_0000625_naive	PLIER	separate	CL_0000625_naive	862	TRUE
chr7_16464652_TTC_T	chr7_16464652_TTC_T gene-level trans (FDR5%) in CD8+ T cell naive	gene-level	gene-level	CL_0000625_naive	2020	TRUE
chr7_33542478_C_T	IC81_ICA_integrated	ICA	integrated	CL_0002057_LPS_2h	674	TRUE
chr7_33542478_C_T	chr7_33542478_C_T gene-level trans (FDR5%) in monocyte LPS_2h	gene-level	gene-level	CL_0002057_LPS_2h	1037	TRUE
chr7_51277573_C_T	F42_PEER_integrated	PEER	integrated	CL_0000775_naive	986	TRUE
chr7_51277573_C_T	chr7_51277573_C_T gene-level trans (FDR5%) in neutrophil naive	gene-level	gene-level	CL_0000775_naive	105	TRUE
chr7_5505075_A_G	Cluster_10720_funcExplorer_separate_CL_0002057_IFNg_24h	funcExplorer	separate	CL_0002057_IFNg_24h	30	TRUE
chr7_5505075_A_G	chr7_5505075_A_G gene-level trans (FDR5%) in monocyte IFNg_24h	gene-level	gene-level	CL_0002057_IFNg_24h	236	TRUE
chr7_5505075_A_G	chr7_5505075_A_G gene-level trans (FDR5%) in B cell naive	gene-level	gene-level	CL_0000236_naive	1	FALSE
chr7_6464609_T_C	MEblue_WGCNA_separate_CL_0000233_naive	WGCNA	separate	CL_0000233_naive	355	TRUE
chr7_6464609_T_C	IC83_ICA_integrated	ICA	integrated	CL_0000233_naive	804	TRUE
chr7_6464609_T_C	chr7_6464609_T_C gene-level trans (FDR5%) in platelet naive	gene-level	gene-level	CL_0000233_naive	434	TRUE
chr7_6464609_T_C	chr7_6464609_T_C gene-level trans (FDR5%) in monocyte LPS_2h	gene-level	gene-level	CL_0002057_LPS_2h	2	TRUE
chr7_6464609_T_C	chr7_6464609_T_C gene-level trans (FDR5%) in monocyte naive	gene-level	gene-level	CL_0002057_naive	1	TRUE
chr7_78044702_T_C	X58.GSE1432_CTRL_VS_IFNG_24H_MICROGLIA_DN_PLIER_integrated	PLIER	integrated	CL_0002057_naive	890	TRUE
chr7_78044702_T_C	IC27_ICA_separate_CL_0002057_naive	ICA	separate	CL_0002057_naive	730	TRUE
chr7_78044702_T_C	chr7_78044702_T_C gene-level trans (FDR5%) in monocyte naive	gene-level	gene-level	CL_0002057_naive	15	TRUE
chr7_86414805_T_TA	MEmidnightblue_WGCNA_integrated	WGCNA	integrated	CL_0002057_LPS_24h	245	TRUE
chr7_86414805_T_TA	chr7_86414805_T_TA gene-level trans (FDR5%) in monocyte LPS_24h	gene-level	gene-level	CL_0002057_LPS_24h	15	TRUE
chr7_86414805_T_TA	chr7_86414805_T_TA gene-level trans (FDR5%) in CD8+ T cell naive	gene-level	gene-level	CL_0000625_naive	1	FALSE
chr7_86414805_T_TA	chr7_86414805_T_TA gene-level trans (FDR5%) in CD4+ T cell naive	gene-level	gene-level	CL_0000624_naive	1	FALSE
chr7_88711735_T_TA	Cluster_13204_funcExplorer_separate_CL_0000625_naive	funcExplorer	separate	CL_0000625_naive	40	TRUE
chr7_88711735_T_TA	chr7_88711735_T_TA gene-level trans (FDR5%) in CD8+ T cell naive	gene-level	gene-level	CL_0000625_naive	2884	TRUE
chr8_107275805_A_G	IC8_ICA_separate_CL_0000775_naive	ICA	separate	CL_0000775_naive	788	TRUE
chr8_107275805_A_G	chr8_107275805_A_G gene-level trans (FDR5%) in neutrophil naive	gene-level	gene-level	CL_0000775_naive	159	TRUE
chr8_107275805_A_G	chr8_107275805_A_G gene-level trans (FDR5%) in B cell naive	gene-level	gene-level	CL_0000236_naive	1	FALSE
chr8_109174974_G_A	X26.RAGHAVACHARI_PLATELET_SPECIFIC_GENES_PLIER_integrated	PLIER	integrated	CL_0000624_naive	852	TRUE
chr8_109174974_G_A	chr8_109174974_G_A gene-level trans (FDR5%) in CD4+ T cell naive	gene-level	gene-level	CL_0000624_naive	158	TRUE
chr8_111338453_G_T	F1_PEER_separate_CL_0002057_LPS_2h	PEER	separate	CL_0002057_LPS_2h	1235	TRUE
chr8_111338453_G_T	Cluster_10442_funcExplorer_separate_CL_0002057_LPS_2h	funcExplorer	separate	CL_0002057_LPS_2h	440	TRUE
chr8_111338453_G_T	chr8_111338453_G_T gene-level trans (FDR5%) in monocyte LPS_2h	gene-level	gene-level	CL_0002057_LPS_2h	1360	TRUE
chr8_111338453_G_T	chr8_111338453_G_T gene-level trans (FDR5%) in monocyte naive	gene-level	gene-level	CL_0002057_naive	1	FALSE
chr8_128701684_C_G	IC13_ICA_separate_CL_0002057_IFNg_24h	ICA	separate	CL_0002057_IFNg_24h	648	TRUE
chr8_128701684_C_G	X29.HOWLIN_CITED1_TARGETS_1_UP_PLIER_separate_CL_0002057_IFNg_24h	PLIER	separate	CL_0002057_IFNg_24h	577	TRUE
chr8_128701684_C_G	MEsteelblue_WGCNA_separate_CL_0002057_IFNg_24h	WGCNA	separate	CL_0002057_IFNg_24h	66	TRUE
chr8_128701684_C_G	IC10_ICA_integrated	ICA	integrated	CL_0002057_IFNg_24h	534	TRUE
chr8_128701684_C_G	X23.BILD_CTNNB1_ONCOGENIC_SIGNATURE_PLIER_integrated	PLIER	integrated	CL_0002057_IFNg_24h	533	TRUE
chr8_128701684_C_G	chr8_128701684_C_G gene-level trans (FDR5%) in monocyte IFNg_24h	gene-level	gene-level	CL_0002057_IFNg_24h	1439	TRUE
chr8_129342797_T_A	Cluster_10675_funcExplorer_separate_CL_0002057_LPS_2h	funcExplorer	separate	CL_0002057_LPS_2h	25	TRUE
chr8_129342797_T_A	chr8_129342797_T_A gene-level trans (FDR5%) in monocyte LPS_2h	gene-level	gene-level	CL_0002057_LPS_2h	440	TRUE
chr8_129342797_T_A	chr8_129342797_T_A gene-level trans (FDR5%) in platelet naive	gene-level	gene-level	CL_0000233_naive	1	FALSE
chr8_133691207_GA_GAA	MEdarkturquoise_WGCNA_integrated	WGCNA	integrated	CL_0000775_naive	139	TRUE
chr8_133691207_GA_GAA	chr8_133691207_GA_GAA gene-level trans (FDR5%) in neutrophil naive	gene-level	gene-level	CL_0000775_naive	599	TRUE
chr8_133691207_GA_GAA	chr8_133691207_GA_GAA gene-level trans (FDR5%) in monocyte naive	gene-level	gene-level	CL_0002057_naive	1	FALSE
chr8_136779695_C_CT	Cluster_17838_funcExplorer_separate_CL_0002057_LPS_2h	funcExplorer	separate	CL_0002057_LPS_2h	71	TRUE
chr8_136779695_C_CT	chr8_136779695_C_CT gene-level trans (FDR5%) in monocyte LPS_2h	gene-level	gene-level	CL_0002057_LPS_2h	388	TRUE
chr8_138704718_G_T	MEpink_WGCNA_separate_CL_0000775_naive	WGCNA	separate	CL_0000775_naive	158	TRUE
chr8_138704718_G_T	IC123_ICA_integrated	ICA	integrated	CL_0000775_naive	920	TRUE
chr8_138704718_G_T	chr8_138704718_G_T gene-level trans (FDR5%) in neutrophil naive	gene-level	gene-level	CL_0000775_naive	1226	TRUE
chr8_138704718_G_T	chr8_138704718_G_T gene-level trans (FDR5%) in monocyte LPS_24h	gene-level	gene-level	CL_0002057_LPS_24h	1	FALSE
chr8_17529373_A_AAATC	Cluster_12081_funcExplorer_separate_CL_0002057_LPS_2h	funcExplorer	separate	CL_0002057_LPS_2h	9	TRUE
chr8_17529373_A_AAATC	chr8_17529373_A_AAATC gene-level trans (FDR5%) in monocyte LPS_2h	gene-level	gene-level	CL_0002057_LPS_2h	341	TRUE
chr8_25953353_A_C	X18.WIERENGA_STAT5A_TARGETS_DN_PLIER_integrated	PLIER	integrated	CL_0000233_naive	720	TRUE
chr8_25953353_A_C	MEgreenyellow_WGCNA_separate_CL_0000233_naive	WGCNA	separate	CL_0000233_naive	97	TRUE
chr8_25953353_A_C	chr8_25953353_A_C gene-level trans (FDR5%) in platelet naive	gene-level	gene-level	CL_0000233_naive	799	TRUE
chr8_28139515_GA_G	Cluster_482_funcExplorer_separate_CL_0002057_LPS_2h	funcExplorer	separate	CL_0002057_LPS_2h	889	TRUE
chr8_28139515_GA_G	chr8_28139515_GA_G gene-level trans (FDR5%) in monocyte LPS_2h	gene-level	gene-level	CL_0002057_LPS_2h	15	FALSE
chr8_31749736_GAT_G	F37_PEER_integrated	PEER	integrated	CL_0000624_naive	968	TRUE
chr8_31749736_GAT_G	chr8_31749736_GAT_G gene-level trans (FDR5%) in CD4+ T cell naive	gene-level	gene-level	CL_0000624_naive	4	TRUE
chr8_3947927_T_C	Cluster_4609_funcExplorer_separate_CL_0000236_naive	funcExplorer	separate	CL_0000236_naive	5	FALSE
chr8_3947927_T_C	chr8_3947927_T_C gene-level trans (FDR5%) in B cell naive	gene-level	gene-level	CL_0000236_naive	68	FALSE
chr8_71835579_G_A	MEmidnightblue_WGCNA_separate_CL_0002057_LPS_24h	WGCNA	separate	CL_0002057_LPS_24h	142	TRUE
chr8_71835579_G_A	chr8_71835579_G_A gene-level trans (FDR5%) in monocyte LPS_24h	gene-level	gene-level	CL_0002057_LPS_24h	1084	TRUE
chr8_77786056_C_T	X50.GSE9006_TYPE_1_DIABETES_AT_DX_VS_1MONTH_POST_DX_PBMC_UP_PLIER_integrated	PLIER	integrated	CL_0002057_IFNg_24h	771	TRUE
chr8_77786056_C_T	chr8_77786056_C_T gene-level trans (FDR5%) in monocyte IFNg_24h	gene-level	gene-level	CL_0002057_IFNg_24h	192	TRUE
chr8_77786056_C_T	chr8_77786056_C_T gene-level trans (FDR5%) in monocyte LPS_2h	gene-level	gene-level	CL_0002057_LPS_2h	1	FALSE
chr9_109832578_C_T	Cluster_14236_funcExplorer_separate_CL_0002057_naive	funcExplorer	separate	CL_0002057_naive	5	TRUE
chr9_109832578_C_T	chr9_109832578_C_T gene-level trans (FDR5%) in monocyte naive	gene-level	gene-level	CL_0002057_naive	983	TRUE
chr9_109832578_C_T	chr9_109832578_C_T gene-level trans (FDR5%) in neutrophil naive	gene-level	gene-level	CL_0000775_naive	1	FALSE
chr9_117417308_A_C	Cluster_952_funcExplorer_separate_CL_0002057_naive	funcExplorer	separate	CL_0002057_naive	8	TRUE
chr9_117417308_A_C	chr9_117417308_A_C gene-level trans (FDR5%) in monocyte naive	gene-level	gene-level	CL_0002057_naive	4	FALSE
chr9_117417308_A_C	chr9_117417308_A_C gene-level trans (FDR5%) in CD8+ T cell naive	gene-level	gene-level	CL_0000625_naive	1	FALSE
chr9_123465308_AT_A	F48_PEER_integrated	PEER	integrated	CL_0002057_IFNg_24h	1081	TRUE
chr9_123465308_AT_A	chr9_123465308_AT_A gene-level trans (FDR5%) in monocyte IFNg_24h	gene-level	gene-level	CL_0002057_IFNg_24h	399	TRUE
chr9_123465308_AT_A	chr9_123465308_AT_A gene-level trans (FDR5%) in CD8+ T cell naive	gene-level	gene-level	CL_0000625_naive	1	FALSE
chr9_126717256_T_C	LV.62_PLIER_integrated	PLIER	integrated	CL_0000236_naive	378	TRUE
chr9_126717256_T_C	chr9_126717256_T_C gene-level trans (FDR5%) in B cell naive	gene-level	gene-level	CL_0000236_naive	23	FALSE
chr9_19754478_G_A	LV.73_PLIER_integrated	PLIER	integrated	CL_0000775_naive	866	TRUE
chr9_19754478_G_A	IC38_ICA_integrated	ICA	integrated	CL_0000775_naive	987	TRUE
chr9_19754478_G_A	Cluster_13683_funcExplorer_separate_CL_0000775_naive	funcExplorer	separate	CL_0000775_naive	347	TRUE
chr9_19754478_G_A	Cluster_17996_funcExplorer_integrated	funcExplorer	integrated	CL_0000775_naive	234	TRUE
chr9_19754478_G_A	LV.67_PLIER_integrated	PLIER	integrated	CL_0000775_naive	914	TRUE
chr9_19754478_G_A	MEturquoise_WGCNA_integrated	WGCNA	integrated	CL_0000775_naive	2522	TRUE
chr9_19754478_G_A	Cluster_8817_funcExplorer_separate_CL_0000775_naive	funcExplorer	separate	CL_0000775_naive	26	TRUE
chr9_19754478_G_A	chr9_19754478_G_A gene-level trans (FDR5%) in neutrophil naive	gene-level	gene-level	CL_0000775_naive	229	TRUE
chr9_19754478_G_A	chr9_19754478_G_A gene-level trans (FDR5%) in monocyte LPS_2h	gene-level	gene-level	CL_0002057_LPS_2h	1	TRUE
chr9_20086858_A_G	Cluster_15128_funcExplorer_separate_CL_0002057_LPS_24h	funcExplorer	separate	CL_0002057_LPS_24h	46	TRUE
chr9_20086858_A_G	chr9_20086858_A_G gene-level trans (FDR5%) in monocyte LPS_24h	gene-level	gene-level	CL_0002057_LPS_24h	543	TRUE
chr9_20818520_A_G	F41_PEER_integrated	PEER	integrated	CL_0002057_LPS_24h	933	TRUE
chr9_20818520_A_G	MEplum2_WGCNA_integrated	WGCNA	integrated	CL_0002057_LPS_24h	38	TRUE
chr9_20818520_A_G	Cluster_2134_funcExplorer_integrated	funcExplorer	integrated	CL_0002057_LPS_24h	18	TRUE
chr9_20818520_A_G	Cluster_15925_funcExplorer_separate_CL_0002057_LPS_24h	funcExplorer	separate	CL_0002057_LPS_24h	99	TRUE
chr9_20818520_A_G	IC25_ICA_separate_CL_0002057_LPS_24h	ICA	separate	CL_0002057_LPS_24h	863	TRUE
chr9_20818520_A_G	IC140_ICA_integrated	ICA	integrated	CL_0002057_LPS_24h	445	TRUE
chr9_20818520_A_G	MEbrown_WGCNA_separate_CL_0002057_LPS_24h	WGCNA	separate	CL_0002057_LPS_24h	402	TRUE
chr9_20818520_A_G	Cluster_2974_funcExplorer_integrated	funcExplorer	integrated	CL_0002057_LPS_24h	6	TRUE
chr9_20818520_A_G	Cluster_10644_funcExplorer_separate_CL_0002057_LPS_24h	funcExplorer	separate	CL_0002057_LPS_24h	101	TRUE
chr9_20818520_A_G	X4.GSE13485_CTRL_VS_DAY7_YF17D_VACCINE_PBMC_DN_PLIER_separate_CL_0002057_LPS_24h	PLIER	separate	CL_0002057_LPS_24h	630	TRUE
chr9_20818520_A_G	Cluster_5752_funcExplorer_integrated	funcExplorer	integrated	CL_0002057_LPS_24h	9	TRUE
chr9_20818520_A_G	X14.GSE13485_CTRL_VS_DAY7_YF17D_VACCINE_PBMC_DN_PLIER_integrated	PLIER	integrated	CL_0002057_LPS_24h	386	TRUE
chr9_20818520_A_G	chr9_20818520_A_G gene-level trans (FDR5%) in monocyte LPS_24h	gene-level	gene-level	CL_0002057_LPS_24h	402	TRUE
chr9_20818520_A_G	chr9_20818520_A_G gene-level trans (FDR5%) in monocyte LPS_2h	gene-level	gene-level	CL_0002057_LPS_2h	55	TRUE
chr9_24477130_G_A	F46_PEER_integrated	PEER	integrated	CL_0000233_naive	1022	TRUE
chr9_24477130_G_A	chr9_24477130_G_A gene-level trans (FDR5%) in platelet naive	gene-level	gene-level	CL_0000233_naive	6	TRUE
chr9_24477130_G_A	chr9_24477130_G_A gene-level trans (FDR5%) in monocyte IFNg_24h	gene-level	gene-level	CL_0002057_IFNg_24h	1	FALSE
chr9_27119890_C_CGTGT	Cluster_12923_funcExplorer_separate_CL_0000775_naive	funcExplorer	separate	CL_0000775_naive	14	TRUE
chr9_27119890_C_CGTGT	chr9_27119890_C_CGTGT gene-level trans (FDR5%) in neutrophil naive	gene-level	gene-level	CL_0000775_naive	977	TRUE
chr9_27482969_C_T	Cluster_18231_funcExplorer_separate_CL_0002057_LPS_24h	funcExplorer	separate	CL_0002057_LPS_24h	12	TRUE
chr9_27482969_C_T	IC115_ICA_integrated	ICA	integrated	CL_0002057_LPS_24h	806	TRUE
chr9_27482969_C_T	chr9_27482969_C_T gene-level trans (FDR5%) in monocyte LPS_24h	gene-level	gene-level	CL_0002057_LPS_24h	1349	TRUE
chr9_6644925_C_G	F24_PEER_integrated	PEER	integrated	CL_0002057_LPS_24h	1069	TRUE
chr9_6644925_C_G	chr9_6644925_C_G gene-level trans (FDR5%) in monocyte LPS_24h	gene-level	gene-level	CL_0002057_LPS_24h	192	FALSE
chr9_6644925_C_G	chr9_6644925_C_G gene-level trans (FDR5%) in CD4+ T cell naive	gene-level	gene-level	CL_0000624_naive	1	FALSE
chr9_68747480_A_G	MEgreenyellow_WGCNA_separate_CL_0002057_LPS_2h	WGCNA	separate	CL_0002057_LPS_2h	141	TRUE
chr9_68747480_A_G	chr9_68747480_A_G gene-level trans (FDR5%) in monocyte LPS_2h	gene-level	gene-level	CL_0002057_LPS_2h	60	TRUE
chr9_75599109_T_C	X56.SEIDEN_ONCOGENESIS_BY_MET_PLIER_integrated	PLIER	integrated	CL_0000236_naive	793	TRUE
chr9_75599109_T_C	chr9_75599109_T_C gene-level trans (FDR5%) in B cell naive	gene-level	gene-level	CL_0000236_naive	848	TRUE
chr9_85107718_A_T	IC14_ICA_separate_CL_0002057_naive	ICA	separate	CL_0002057_naive	748	TRUE
chr9_85107718_A_T	chr9_85107718_A_T gene-level trans (FDR5%) in monocyte IFNg_24h	gene-level	gene-level	CL_0002057_IFNg_24h	4	FALSE
chr9_85107718_A_T	chr9_85107718_A_T gene-level trans (FDR5%) in monocyte naive	gene-level	gene-level	CL_0002057_naive	2	FALSE
chr9_85107718_A_T	chr9_85107718_A_T gene-level trans (FDR5%) in monocyte LPS_24h	gene-level	gene-level	CL_0002057_LPS_24h	1	FALSE
chr9_86035878_C_A	Cluster_11856_funcExplorer_separate_CL_0002057_naive	funcExplorer	separate	CL_0002057_naive	5	TRUE
chr9_86035878_C_A	chr9_86035878_C_A gene-level trans (FDR5%) in monocyte naive	gene-level	gene-level	CL_0002057_naive	93	TRUE
chr9_90792585_A_G	MEviolet_WGCNA_separate_CL_0000624_naive	WGCNA	separate	CL_0000624_naive	90	TRUE
chr9_90792585_A_G	chr9_90792585_A_G gene-level trans (FDR5%) in CD4+ T cell naive	gene-level	gene-level	CL_0000624_naive	104	TRUE
chr9_90792585_A_G	chr9_90792585_A_G gene-level trans (FDR5%) in monocyte LPS_2h	gene-level	gene-level	CL_0002057_LPS_2h	2	FALSE

## Sheet: Field_descriptions
Field	Description
meta_id	Unique identifier for lead trans-eQTL we use as represenative for the locus (of form "chromosome_position_ref_alt")
cl_id	Module identifier or stating whether it is a result for gene-level analysis
cl_method	Co-expression method
approach	Data partitioning approach (integrated or separate) or gene-level if results from gene-level trans-analysis
qtl_group	Cell type/condition identifier of the association.
cl_size	Number of genes in the module or number of gene-level trans associated genes (if approach is 'gene-level')
is_enriched	Indicator if the module or gene-level results were enriched in any of biological functions from GO, Reactome and KEGG using g:Profiler for analysis
