# Supplementary material for: Co-expression analysis reveals interpretable gene modules controlled by trans-acting genetic variants
Source: eLife. 2020 Sep 3;9:e58705. doi: 10.7554/eLife.58705 (PMC7470823; doi:10.7554/eLife.58705)
Supplement: Supplementary file 4. [file elife-58705-supp4.xlsx]

## Sheet: Supplementary_file4
snp	trans	cis	ACME_estimate	ACME_95CI	ACME_p_val	ADE_estimate	ADE_95CI	ADE_p_val	total_effect_estimate	total_effect_95CI	total_effect_p_val	prop_mediated_estimate	prop_mediated_95CI	prop_mediated_p_val	sample_size	simulations	approach	cis_gene	condition
chr4_102325419_ACACT_A	Cluster_10413	ENSG00000138821	-0.120982959941357	-2.03e-01...-5.06e-02	<2e-16	-0.573445986549896	-8.09e-01...-3.47e-01	<2e-16	-0.694428946491254	-9.29e-01...-4.64e-01	<2e-16	0.17421935037796	7.49e-02...3.09e-01	<2e-16	325	1000	separate	SLC39A8	monocytes_LPS_24h
chr3_56815721_T_C	IC68	ENSG00000163947	0.135607923797088	5.31e-02...2.20e-01	0.002	0.36622524102752	2.01e-01...5.44e-01	<2e-16	0.501833164824607	3.52e-01...6.56e-01	<2e-16	0.270225113249506	9.80e-02...4.92e-01	0.002	226	1000	integrated	ARHGEF3	platelet
chr3_56815721_T_C	X6.WIERENGA_STAT5A_TARGETS_DN	ENSG00000163947	0.129979034544934	4.33e-02...2.11e-01	<2e-16	-0.6220210776368	-8.15e-01...-4.20e-01	<2e-16	-0.492042043091866	-6.65e-01...-3.19e-01	<2e-16	-0.264162455972622	-4.87e-01...-8.48e-02	<2e-16	226	1000	separate	ARHGEF3	platelet
chr3_56815721_T_C	Cluster_12953	ENSG00000163947	0.0864090512960081	4.03e-03...1.79e-01	0.042	0.445634481244025	2.59e-01...6.24e-01	<2e-16	0.532043532540033	3.67e-01...6.97e-01	<2e-16	0.162409739074324	8.01e-03...3.48e-01	0.042	226	1000	separate	ARHGEF3	platelet
chr12_69344099_A_G	F29	ENSG00000090382	0.0833953572529875	1.75e-02...1.51e-01	0.012	-0.348689536914148	-4.67e-01...-2.32e-01	<2e-16	-0.265294179661161	-3.73e-01...-1.66e-01	<2e-16	-0.314350497095345	-6.76e-01...-6.36e-02	0.012	710	1000	integrated	LYZ	monocytes_naive
chr12_69344099_A_G	IC152	ENSG00000090382	-0.0991171091671274	-1.74e-01...-2.32e-02	0.016	-0.20605218447212	-3.52e-01...-7.22e-02	0.004	-0.305169293639247	-4.20e-01...-1.95e-01	<2e-16	0.324793847982287	6.94e-02...6.69e-01	0.016	710	1000	integrated	LYZ	monocytes_naive
chr12_69344099_A_G	X42.GSE29617_CTRL_VS_DAY3_TIV_FLU_VACCINE_PBMC_2008_UP	ENSG00000090382	-0.0502532006900614	-1.10e-01...1.14e-02	0.094	0.402120335257979	2.89e-01...5.22e-01	<2e-16	0.351867134567918	2.57e-01...4.55e-01	<2e-16	-0.14281868282973	-3.34e-01...3.27e-02	0.094	710	1000	integrated	LYZ	monocytes_naive
chr12_69344099_A_G	IC20	ENSG00000090382	-0.0149294317910134	-7.42e-02...4.38e-02	0.648	-0.37908289676361	-4.96e-01...-2.66e-01	<2e-16	-0.394012328554624	-4.99e-01...-2.89e-01	<2e-16	0.0378907732298119	-1.21e-01...2.01e-01	0.648	710	1000	integrated	LYZ	monocytes_naive
chr12_69344099_A_G	F40	ENSG00000090382	-0.0703268028742162	-1.33e-01...-5.79e-03	0.03	-0.521706894067396	-6.39e-01...-4.08e-01	<2e-16	-0.592033696941613	-6.92e-01...-5.02e-01	<2e-16	0.118788513622649	1.05e-02...2.37e-01	0.03	710	1000	integrated	LYZ	monocytes_naive
chr12_69344099_A_G	F21	ENSG00000090382	-0.069470099559649	-1.42e-01...-2.12e-03	0.044	0.443389715852336	3.22e-01...5.72e-01	<2e-16	0.373919616292687	2.76e-01...4.71e-01	<2e-16	-0.185788860847758	-4.10e-01...-4.63e-03	0.044	710	1000	integrated	LYZ	monocytes_naive
chr12_69344099_A_G	F48	ENSG00000090382	0.087279929688297	2.01e-02...1.54e-01	0.008	-0.473536442564123	-5.92e-01...-3.65e-01	<2e-16	-0.386256512875826	-4.88e-01...-2.96e-01	<2e-16	-0.225963645346624	-4.29e-01...-5.02e-02	0.008	710	1000	integrated	LYZ	monocytes_naive
chr12_69344099_A_G	F49	ENSG00000090382	-0.0137309369366818	-7.92e-02...5.63e-02	0.692	-0.34447732524615	-4.67e-01...-2.20e-01	<2e-16	-0.358208262182831	-4.62e-01...-2.59e-01	<2e-16	0.0383322731112031	-1.56e-01...2.39e-01	0.692	710	1000	integrated	LYZ	monocytes_naive
chr12_69344099_A_G	F38	ENSG00000090382	0.0266045652314461	-4.56e-02...9.41e-02	0.45	-0.372133495591012	-4.94e-01...-2.40e-01	<2e-16	-0.345528930359566	-4.45e-01...-2.41e-01	<2e-16	-0.0769966358642116	-2.81e-01...1.41e-01	0.45	710	1000	integrated	LYZ	monocytes_naive
chr12_69344099_A_G	F32	ENSG00000090382	-0.106213084331916	-1.76e-01...-4.08e-02	0.004	-0.267415395447038	-3.97e-01...-1.34e-01	<2e-16	-0.373628479778954	-4.67e-01...-2.70e-01	<2e-16	0.284274593828483	1.04e-01...5.32e-01	0.004	710	1000	integrated	LYZ	monocytes_naive
chr12_69344099_A_G	MEfloralwhite	ENSG00000090382	-0.00350967421488455	-6.95e-02...6.40e-02	0.884	0.731222003402443	6.24e-01...8.44e-01	<2e-16	0.727712329187559	6.38e-01...8.21e-01	<2e-16	-0.00482288683881838	-9.91e-02...8.94e-02	0.884	710	1000	integrated	LYZ	monocytes_naive
chr12_69344099_A_G	X5.LU_EZH2_TARGETS_DN	ENSG00000090382	-0.00917104029594628	-6.47e-02...6.06e-02	0.848	-0.588367336431259	-7.19e-01...-4.63e-01	<2e-16	-0.597538376727205	-6.98e-01...-4.93e-01	<2e-16	0.0153480356294055	-9.57e-02...1.11e-01	0.848	710	1000	integrated	LYZ	monocytes_naive
chr12_69344099_A_G	F33	ENSG00000090382	0.128504219089437	7.30e-02...1.84e-01	<2e-16	0.369973924771042	2.45e-01...4.92e-01	<2e-16	0.498478143860479	3.97e-01...5.94e-01	<2e-16	0.257793086160674	1.39e-01...4.11e-01	<2e-16	710	1000	integrated	LYZ	monocytes_naive
chr12_69344099_A_G	IC86	ENSG00000090382	0.00136867231850047	-6.43e-02...6.37e-02	0.976	0.747797328954206	6.36e-01...8.52e-01	<2e-16	0.749166001272707	6.63e-01...8.33e-01	<2e-16	0.0018269279654647	-9.02e-02...8.44e-02	0.976	710	1000	integrated	LYZ	monocytes_naive
chr12_69344099_A_G	X32.CHEN_ETV5_TARGETS_TESTIS	ENSG00000090382	-0.0563576179155118	-1.19e-01...5.50e-03	0.078	0.354186554180229	2.41e-01...4.70e-01	<2e-16	0.297828936264718	2.01e-01...3.98e-01	<2e-16	-0.189228147614978	-4.60e-01...1.84e-02	0.078	710	1000	integrated	LYZ	monocytes_naive
chr12_69344099_A_G	F47	ENSG00000090382	-0.0865235377719362	-1.52e-01...-2.10e-02	0.014	-0.200935945260244	-3.41e-01...-7.54e-02	0.002	-0.28745948303218	-3.95e-01...-1.83e-01	<2e-16	0.300993854366078	6.08e-02...6.38e-01	0.014	710	1000	integrated	LYZ	monocytes_naive
chr12_69344099_A_G	F39	ENSG00000090382	0.0397911605970958	-2.73e-02...1.05e-01	0.23	-0.331265342744695	-4.57e-01...-1.98e-01	<2e-16	-0.291474182147599	-3.94e-01...-1.94e-01	<2e-16	-0.136516930260897	-3.75e-01...1.02e-01	0.23	710	1000	integrated	LYZ	monocytes_naive
chr12_69344099_A_G	F41	ENSG00000090382	-0.0270512877815572	-8.77e-02...3.07e-02	0.358	0.560265331434213	4.43e-01...6.70e-01	<2e-16	0.533214043652655	4.30e-01...6.22e-01	<2e-16	-0.0507325118375519	-1.68e-01...5.86e-02	0.358	710	1000	integrated	LYZ	monocytes_naive
chr12_69344099_A_G	MEsalmon	ENSG00000090382	-0.0272502495328355	-9.18e-02...4.12e-02	0.426	-0.535406691926963	-6.63e-01...-4.10e-01	<2e-16	-0.562656941459799	-6.58e-01...-4.62e-01	<2e-16	0.0484313753637082	-7.00e-02...1.69e-01	0.426	710	1000	integrated	LYZ	monocytes_naive
chr12_69344099_A_G	F47	ENSG00000090382	0.013860031928941	-5.19e-02...7.70e-02	0.674	0.27593792149508	1.50e-01...3.92e-01	<2e-16	0.289797953424021	1.91e-01...3.93e-01	<2e-16	0.0478265348846739	-1.86e-01...2.77e-01	0.674	710	1000	separate	LYZ	monocytes_naive
chr12_69344099_A_G	F16	ENSG00000090382	-0.0292454720764523	-1.03e-01...3.32e-02	0.386	-0.263486968263016	-3.84e-01...-1.39e-01	<2e-16	-0.292732440339468	-4.00e-01...-1.93e-01	<2e-16	0.0999051285280773	-1.22e-01...3.90e-01	0.386	710	1000	separate	LYZ	monocytes_naive
chr12_69344099_A_G	F29	ENSG00000090382	-0.0312140894414568	-8.71e-02...3.16e-02	0.352	0.394314421059611	2.60e-01...5.06e-01	<2e-16	0.363100331618154	2.53e-01...4.60e-01	<2e-16	-0.0859654666310862	-2.67e-01...9.15e-02	0.352	710	1000	separate	LYZ	monocytes_naive
chr12_69344099_A_G	F27	ENSG00000090382	-0.082540262229324	-1.45e-01...-2.47e-02	0.006	0.371276784526782	2.58e-01...4.94e-01	<2e-16	0.288736522297458	1.96e-01...3.94e-01	<2e-16	-0.285867065144916	-5.55e-01...-8.19e-02	0.006	710	1000	separate	LYZ	monocytes_naive
chr12_69344099_A_G	X16.LU_EZH2_TARGETS_DN	ENSG00000090382	-0.00852401766283301	-5.85e-02...4.97e-02	0.784	-0.817499983665064	-9.28e-01...-7.14e-01	<2e-16	-0.826024001327897	-9.13e-01...-7.44e-01	<2e-16	0.0103193341224105	-6.19e-02...7.29e-02	0.784	710	1000	separate	LYZ	monocytes_naive
chr12_69344099_A_G	IC6	ENSG00000090382	0.00543513511883197	-6.62e-02...7.16e-02	0.914	0.471237398469186	3.43e-01...6.06e-01	<2e-16	0.476672533588018	3.77e-01...5.85e-01	<2e-16	0.0114022410268125	-1.43e-01...1.68e-01	0.914	710	1000	separate	LYZ	monocytes_naive
chr12_69344099_A_G	IC10	ENSG00000090382	-0.0183140728237075	-7.06e-02...3.25e-02	0.464	-0.821071163844452	-9.23e-01...-7.20e-01	<2e-16	-0.839385236668159	-9.26e-01...-7.56e-01	<2e-16	0.0218184357118348	-4.00e-02...8.45e-02	0.464	710	1000	separate	LYZ	monocytes_naive
chr12_69344099_A_G	F17	ENSG00000090382	0.00249053764348186	-6.73e-02...7.17e-02	0.904	0.488020419544149	3.49e-01...6.11e-01	<2e-16	0.490510957187631	3.91e-01...5.85e-01	<2e-16	0.00507743528862531	-1.39e-01...1.50e-01	0.904	710	1000	separate	LYZ	monocytes_naive
chr12_69344099_A_G	Cluster_958	ENSG00000090382	-0.0204503008771113	-7.63e-02...4.11e-02	0.51	-0.250678055172842	-3.78e-01...-1.30e-01	<2e-16	-0.271128356049953	-3.72e-01...-1.70e-01	<2e-16	0.0754266398950301	-1.57e-01...3.24e-01	0.51	710	1000	separate	LYZ	monocytes_naive
chr12_69344099_A_G	F23	ENSG00000090382	-0.0383941872303367	-9.53e-02...2.08e-02	0.194	-0.301587193566136	-4.28e-01...-1.89e-01	<2e-16	-0.339981380796473	-4.41e-01...-2.44e-01	<2e-16	0.112930264417395	-6.66e-02...3.00e-01	0.194	710	1000	separate	LYZ	monocytes_naive
chr12_69344099_A_G	MEgreen	ENSG00000090382	-0.0187115302640653	-7.83e-02...4.83e-02	0.508	-0.616871731905465	-7.25e-01...-4.99e-01	<2e-16	-0.635583262169531	-7.24e-01...-5.39e-01	<2e-16	0.0294399355329063	-7.31e-02...1.25e-01	0.508	710	1000	separate	LYZ	monocytes_naive
chr12_69344099_A_G	F33	ENSG00000090382	-0.214344264587086	-3.11e-01...-1.41e-01	<2e-16	0.779836548790315	6.56e-01...9.09e-01	<2e-16	0.56549228420323	4.29e-01...7.08e-01	<2e-16	-0.37904012234065	-6.45e-01...-2.18e-01	<2e-16	370	1000	integrated	LYZ	monocytes_IFNg_24h
chr12_69344099_A_G	F39	ENSG00000090382	0.00908957925279134	-5.02e-02...7.25e-02	0.796	-0.524953508845891	-6.53e-01...-3.87e-01	<2e-16	-0.5158639295931	-6.47e-01...-3.94e-01	<2e-16	-0.0176201101324548	-1.49e-01...1.02e-01	0.796	370	1000	integrated	LYZ	monocytes_IFNg_24h
chr12_69344099_A_G	F48	ENSG00000090382	-0.00287105429385069	-5.59e-02...5.53e-02	0.918	-0.532963644633429	-6.87e-01...-3.81e-01	<2e-16	-0.53583469892728	-6.77e-01...-3.98e-01	<2e-16	0.00535809700192695	-1.14e-01...1.09e-01	0.918	370	1000	integrated	LYZ	monocytes_IFNg_24h
chr12_69344099_A_G	MEsalmon	ENSG00000090382	-0.0150291439069451	-6.79e-02...3.60e-02	0.506	-0.843845717762199	-9.72e-01...-7.19e-01	<2e-16	-0.858874861669144	-9.75e-01...-7.42e-01	<2e-16	0.0174986422093404	-4.51e-02...8.01e-02	0.506	370	1000	integrated	LYZ	monocytes_IFNg_24h
chr12_69344099_A_G	Cluster_3419	ENSG00000090382	0.0601790724483233	5.55e-03...1.25e-01	0.028	0.502821169853543	3.64e-01...6.30e-01	<2e-16	0.563000242301866	4.37e-01...6.92e-01	<2e-16	0.106889958345803	9.36e-03...2.21e-01	0.028	370	1000	integrated	LYZ	monocytes_IFNg_24h
chr12_69344099_A_G	F25	ENSG00000090382	-0.146149907587117	-2.27e-01...-7.13e-02	<2e-16	0.545799041023798	3.85e-01...6.90e-01	<2e-16	0.39964913343668	2.50e-01...5.44e-01	<2e-16	-0.36569554481537	-7.40e-01...-1.71e-01	<2e-16	370	1000	integrated	LYZ	monocytes_IFNg_24h
chr12_69344099_A_G	IC20	ENSG00000090382	-0.161014250317317	-2.41e-01...-9.57e-02	<2e-16	-0.478382106543303	-5.94e-01...-3.53e-01	<2e-16	-0.63939635686062	-7.52e-01...-5.14e-01	<2e-16	0.2518222829856	1.49e-01...3.82e-01	<2e-16	370	1000	integrated	LYZ	monocytes_IFNg_24h
chr12_69344099_A_G	F32	ENSG00000090382	-0.132186025627725	-1.94e-01...-7.20e-02	<2e-16	-0.552404584516993	-6.76e-01...-4.18e-01	<2e-16	-0.684590610144718	-8.04e-01...-5.50e-01	<2e-16	0.193087698938467	1.07e-01...2.91e-01	<2e-16	370	1000	integrated	LYZ	monocytes_IFNg_24h
chr12_69344099_A_G	X5.LU_EZH2_TARGETS_DN	ENSG00000090382	0.0139290885283178	-3.09e-02...6.49e-02	0.522	-0.962829555315258	-1.08e+00...-8.40e-01	<2e-16	-0.94890046678694	-1.06e+00...-8.38e-01	<2e-16	-0.0146791881929228	-6.69e-02...3.25e-02	0.522	370	1000	integrated	LYZ	monocytes_IFNg_24h
chr12_69344099_A_G	MEfloralwhite	ENSG00000090382	-0.0403103425646426	-9.10e-02...-2.17e-04	0.048	0.971250039721559	8.55e-01...1.08e+00	<2e-16	0.930939697156916	8.23e-01...1.04e+00	<2e-16	-0.0433007021698077	-9.82e-02...-2.41e-04	0.048	370	1000	integrated	LYZ	monocytes_IFNg_24h
chr12_69344099_A_G	F29	ENSG00000090382	-0.0212475105035559	-8.27e-02...4.89e-02	0.496	-0.361354578620924	-5.13e-01...-2.10e-01	<2e-16	-0.38260208912448	-5.19e-01...-2.43e-01	<2e-16	0.055534225001691	-1.21e-01...2.39e-01	0.496	370	1000	integrated	LYZ	monocytes_IFNg_24h
chr12_69344099_A_G	X32.CHEN_ETV5_TARGETS_TESTIS	ENSG00000090382	-0.117669261557087	-1.87e-01...-5.99e-02	<2e-16	0.783907753236667	6.52e-01...9.26e-01	<2e-16	0.66623849167958	5.33e-01...8.00e-01	<2e-16	-0.176617327018203	-3.09e-01...-8.40e-02	<2e-16	370	1000	integrated	LYZ	monocytes_IFNg_24h
chr12_69344099_A_G	F20	ENSG00000090382	-0.0317850598358737	-9.56e-02...2.35e-02	0.276	-0.4718929391776	-6.26e-01...-3.20e-01	<2e-16	-0.503677999013474	-6.51e-01...-3.63e-01	<2e-16	0.0631059127024197	-4.85e-02...1.89e-01	0.276	370	1000	integrated	LYZ	monocytes_IFNg_24h
chr12_69344099_A_G	IC86	ENSG00000090382	-0.0274843699711502	-6.82e-02...1.29e-02	0.2	1.03486849683736	9.28e-01...1.14e+00	<2e-16	1.00738412686621	9.02e-01...1.11e+00	<2e-16	-0.027282909506078	-6.95e-02...1.26e-02	0.2	370	1000	integrated	LYZ	monocytes_IFNg_24h
chr12_69344099_A_G	X42.GSE29617_CTRL_VS_DAY3_TIV_FLU_VACCINE_PBMC_2008_UP	ENSG00000090382	-0.00476600620272519	-6.92e-02...5.23e-02	0.822	0.634652258215547	4.98e-01...7.79e-01	<2e-16	0.629886252012822	4.89e-01...7.71e-01	<2e-16	-0.0075664553520501	-1.17e-01...8.28e-02	0.822	370	1000	integrated	LYZ	monocytes_IFNg_24h
chr12_69344099_A_G	F47	ENSG00000090382	0.092765902474857	3.18e-02...1.61e-01	0.002	-0.576653867411934	-7.15e-01...-4.32e-01	<2e-16	-0.483887964937077	-6.21e-01...-3.43e-01	<2e-16	-0.191709464166814	-3.75e-01...-6.22e-02	0.002	370	1000	integrated	LYZ	monocytes_IFNg_24h
chr12_69344099_A_G	IC152	ENSG00000090382	-0.0348518549545199	-9.17e-02...1.83e-02	0.212	-0.637223979735532	-7.77e-01...-4.96e-01	<2e-16	-0.672075834690052	-7.95e-01...-5.45e-01	<2e-16	0.05185702737042	-2.82e-02...1.41e-01	0.212	370	1000	integrated	LYZ	monocytes_IFNg_24h
chr12_69344099_A_G	F19	ENSG00000090382	0.0294054640610767	-2.73e-02...8.95e-02	0.378	-0.374838675070279	-5.34e-01...-2.16e-01	<2e-16	-0.345433211009203	-4.88e-01...-2.03e-01	<2e-16	-0.0851263373755145	-2.94e-01...8.25e-02	0.378	370	1000	separate	LYZ	monocytes_IFNg_24h
chr12_69344099_A_G	F14	ENSG00000090382	0.00485831367643977	-5.24e-02...6.13e-02	0.86	0.547115758307843	3.94e-01...7.05e-01	<2e-16	0.551974071984283	4.14e-01...6.96e-01	<2e-16	0.00880170631742664	-1.01e-01...1.17e-01	0.86	370	1000	separate	LYZ	monocytes_IFNg_24h
chr12_69344099_A_G	F15	ENSG00000090382	-0.0797929132284272	-1.43e-01...-1.93e-02	0.006	0.435722114674733	2.88e-01...5.84e-01	<2e-16	0.355929201446306	2.14e-01...4.99e-01	<2e-16	-0.224181980304486	-4.96e-01...-4.63e-02	0.006	370	1000	separate	LYZ	monocytes_IFNg_24h
chr12_69344099_A_G	Cluster_15295	ENSG00000090382	-0.000894544352676886	-4.92e-02...4.70e-02	0.932	-0.962323980953225	-1.08e+00...-8.54e-01	<2e-16	-0.963218525305902	-1.08e+00...-8.55e-01	<2e-16	0.000928703434553227	-5.03e-02...4.99e-02	0.932	370	1000	separate	LYZ	monocytes_IFNg_24h
chr12_69344099_A_G	MEblack	ENSG00000090382	-0.00800070139413191	-5.56e-02...3.95e-02	0.758	-0.896191156904873	-1.02e+00...-7.69e-01	<2e-16	-0.904191858299005	-1.02e+00...-7.90e-01	<2e-16	0.00884845546959811	-4.54e-02...6.25e-02	0.758	370	1000	separate	LYZ	monocytes_IFNg_24h
chr12_69344099_A_G	X2.TONKS_TARGETS_OF_RUNX1_RUNX1T1_FUSION_GRANULOCYTE_DN	ENSG00000090382	-0.0122178312279654	-5.46e-02...3.47e-02	0.58	-0.957959208760932	-1.08e+00...-8.36e-01	<2e-16	-0.970177039988897	-1.08e+00...-8.55e-01	<2e-16	0.0125934038060777	-3.70e-02...5.78e-02	0.58	370	1000	separate	LYZ	monocytes_IFNg_24h
chr12_69344099_A_G	Cluster_3977	ENSG00000090382	-0.102598296242994	-1.68e-01...-5.07e-02	<2e-16	0.894467184383077	7.60e-01...1.01e+00	<2e-16	0.791868888140082	6.59e-01...9.19e-01	<2e-16	-0.129564752169989	-2.28e-01...-6.22e-02	<2e-16	370	1000	separate	LYZ	monocytes_IFNg_24h
chr12_69344099_A_G	IC11	ENSG00000090382	-0.130944227438624	-2.11e-01...-7.23e-02	<2e-16	-0.474849095893088	-6.15e-01...-3.33e-01	<2e-16	-0.605793323331713	-7.42e-01...-4.74e-01	<2e-16	0.216153302447217	1.17e-01...3.64e-01	<2e-16	370	1000	separate	LYZ	monocytes_IFNg_24h
chr12_69344099_A_G	IC24	ENSG00000090382	-0.00788984321190624	-5.14e-02...3.66e-02	0.7	-0.950860608900289	-1.07e+00...-8.36e-01	<2e-16	-0.958750452112196	-1.07e+00...-8.54e-01	<2e-16	0.0082292980352962	-3.77e-02...5.54e-02	0.7	370	1000	separate	LYZ	monocytes_IFNg_24h
chr12_69344099_A_G	Cluster_13927	ENSG00000090382	0.00280040928964416	-5.85e-02...5.83e-02	0.932	-0.511004397162339	-6.61e-01...-3.65e-01	<2e-16	-0.508203987872695	-6.43e-01...-3.84e-01	<2e-16	-0.00551040400404269	-1.20e-01...1.22e-01	0.932	370	1000	separate	LYZ	monocytes_IFNg_24h

## Sheet: Field_descriptions
Field	Description
snp	Trans/cis lead used in mediation analysis
trans	Trans module used in mediation analysis
cis	Cis gene Ensembl identifier that was used as mediatior in mediation analysis
ACME_estimate	Estimation of ACME (Average Causal Mediation Effec or indirect effect)
ACME_95CI	95% confidence intervals for ACME estimation
ACME_p_val	P-value for ACME estimation
ADE_estimate	Estimation of ADE (Average direct effect)
ADE_95CI	95% confidence intervals for ADE estimation
ADE_p_val	P-value for ADE estimation
total_effect_estimate	Estimation of total effect
total_effect_95CI	95% confidence intervals for Total effect estimation
total_effect_p_val	P-value for Total effect estimation
prop_mediated_estimate	Estimate for proportion mediated
prop_mediated_95CI	95% confidence intervals for the estimated proportion mediated
prop_mediated_p_val	P-value for proportion mediated
sample_size	Sample size
simulations	Number of simulations in Bootstrap method
approach	Data partition approach of trans associated module
cis_gene	Name of the cis gene used as mediator
condition	Condition where mediation was tested
