# Supplementary material for: Co-expression analysis reveals interpretable gene modules controlled by trans-acting genetic variants
Source: eLife. 2020 Sep 3;9:e58705. doi: 10.7554/eLife.58705 (PMC7470823; doi:10.7554/eLife.58705)
Supplement: Supplementary file 5. [file elife-58705-supp5.xlsx]

## Sheet: Supplementary_file5
locus	rs_id	meta_id	context	cl_id	cl_size	domain_size	overlap_size	repl_set_size	study	repl_rs_id	replication_context	fisher_pval	adj_fisher_pval
ARHGEF3	rs1354034	chr3_56815721_T_C	platelet	IC68_ICA_integrated	1074	18383	51	840	eQTLGen	rs1354034	blood	0.407636050881644	1
ARHGEF3	rs1354034	chr3_56815721_T_C	platelet	X6.WIERENGA_STAT5A_TARGETS_DN_PLIER_separate_CL_0000233_naive	918	18383	213	840	eQTLGen	rs1354034	blood	6.81846989999733e-95	4.0910819399984e-94
ARHGEF3	rs1354034	chr3_56815721_T_C	platelet	Cluster_12953_funcExplorer_separate_CL_0000233_naive	5	18383	4	840	eQTLGen	rs1354034	blood	2.08621241087985e-05	0.000125172744652791
ARHGEF3	rs1354034	chr3_56815721_T_C	platelet	IC68_ICA_integrated	1074	18383	4	163	Nath_2017	rs1354034	blood	0.987614570735278	1
ARHGEF3	rs1354034	chr3_56815721_T_C	platelet	X6.WIERENGA_STAT5A_TARGETS_DN_PLIER_separate_CL_0000233_naive	918	18383	39	163	Nath_2017	rs1354034	blood	1.3657585628451e-16	8.19455137707058e-16
ARHGEF3	rs1354034	chr3_56815721_T_C	platelet	Cluster_12953_funcExplorer_separate_CL_0000233_naive	5	18383	1	163	Nath_2017	rs1354034	blood	0.0435598182221649	0.26135890933299
IFNB1	rs13296842	chr9_20818520_A_G	monocytes LPS 24h	F41_PEER_integrated	933	18383	86	217	Quach_2016	rs12553564	monocytes LPS 6h	2.25159286005599e-54	2.70191143206719e-53
IFNB1	rs13296842	chr9_20818520_A_G	monocytes LPS 24h	MEplum2_WGCNA_integrated	38	18383	17	217	Quach_2016	rs12553564	monocytes LPS 6h	2.05777920477511e-23	2.46933504573013e-22
IFNB1	rs13296842	chr9_20818520_A_G	monocytes LPS 24h	Cluster_2134_funcExplorer_integrated	18	18383	8	217	Quach_2016	rs12553564	monocytes LPS 6h	1.30994945867309e-11	1.57193935040771e-10
IFNB1	rs13296842	chr9_20818520_A_G	monocytes LPS 24h	Cluster_15925_funcExplorer_separate_CL_0002057_LPS_24h	99	18383	78	217	Quach_2016	rs12553564	monocytes LPS 6h	8.70779921131402e-137	1.04493590535768e-135
IFNB1	rs13296842	chr9_20818520_A_G	monocytes LPS 24h	IC25_ICA_separate_CL_0002057_LPS_24h	863	18383	174	217	Quach_2016	rs12553564	monocytes LPS 6h	1.27499063871832e-194	1.52998876646198e-193
IFNB1	rs13296842	chr9_20818520_A_G	monocytes LPS 24h	IC140_ICA_integrated	445	18383	161	217	Quach_2016	rs12553564	monocytes LPS 6h	8.18404567372164e-223	9.82085480846597e-222
IFNB1	rs13296842	chr9_20818520_A_G	monocytes LPS 24h	MEbrown_WGCNA_separate_CL_0002057_LPS_24h	402	18383	145	217	Quach_2016	rs12553564	monocytes LPS 6h	6.03235709604707e-196	7.23882851525648e-195
IFNB1	rs13296842	chr9_20818520_A_G	monocytes LPS 24h	Cluster_2974_funcExplorer_integrated	6	18383	4	217	Quach_2016	rs12553564	monocytes LPS 6h	2.78127506859266e-07	3.33753008231119e-06
IFNB1	rs13296842	chr9_20818520_A_G	monocytes LPS 24h	Cluster_10644_funcExplorer_separate_CL_0002057_LPS_24h	101	18383	44	217	Quach_2016	rs12553564	monocytes LPS 6h	7.41845424788189e-59	8.90214509745827e-58
IFNB1	rs13296842	chr9_20818520_A_G	monocytes LPS 24h	X4.GSE13485_CTRL_VS_DAY7_YF17D_VACCINE_PBMC_DN_PLIER_separate_CL_0002057_LPS_24h	630	18383	170	217	Quach_2016	rs12553564	monocytes LPS 6h	7.72619221833026e-213	9.27143066199631e-212
IFNB1	rs13296842	chr9_20818520_A_G	monocytes LPS 24h	Cluster_5752_funcExplorer_integrated	9	18383	7	217	Quach_2016	rs12553564	monocytes LPS 6h	1.02310207474456e-12	1.22772248969348e-11
IFNB1	rs13296842	chr9_20818520_A_G	monocytes LPS 24h	X14.GSE13485_CTRL_VS_DAY7_YF17D_VACCINE_PBMC_DN_PLIER_integrated	386	18383	164	217	Quach_2016	rs12553564	monocytes LPS 6h	1.94641811350827e-242	2.33570173620993e-241
LYZ	rs10784774	chr12_69344099_A_G	monocytes naive	F47_PEER_separate_CL_0002057_naive	887	18383	14	193	Rakitsch_2016	rs6581889	monocytes	0.0843552002499769	1
LYZ	rs10784774	chr12_69344099_A_G	monocytes naive	F29_PEER_integrated	1018	18383	24	193	Rakitsch_2016	rs6581889	monocytes	0.000175330904604465	0.0105198542762679
LYZ	rs10784774	chr12_69344099_A_G	monocytes naive	F16_PEER_separate_CL_0002057_naive	1099	18383	13	193	Rakitsch_2016	rs6581889	monocytes	0.369382070576741	1
LYZ	rs10784774	chr12_69344099_A_G	monocytes naive	IC152_ICA_integrated	398	18383	6	193	Rakitsch_2016	rs6581889	monocytes	0.241149383040398	1
LYZ	rs10784774	chr12_69344099_A_G	monocytes naive	X42.GSE29617_CTRL_VS_DAY3_TIV_FLU_VACCINE_PBMC_2008_UP_PLIER_integrated	851	18383	19	193	Rakitsch_2016	rs6581889	monocytes	0.00161128238020867	0.0966769428125204
LYZ	rs10784774	chr12_69344099_A_G	monocytes naive	IC20_ICA_integrated	825	18383	7	193	Rakitsch_2016	rs6581889	monocytes	0.768243658841123	1
LYZ	rs10784774	chr12_69344099_A_G	monocytes naive	F40_PEER_integrated	1054	18383	17	193	Rakitsch_2016	rs6581889	monocytes	0.0520003287490811	1
LYZ	rs10784774	chr12_69344099_A_G	monocytes naive	F21_PEER_integrated	973	18383	14	193	Rakitsch_2016	rs6581889	monocytes	0.144657717020858	1
LYZ	rs10784774	chr12_69344099_A_G	monocytes naive	F29_PEER_separate_CL_0002057_naive	854	18383	18	193	Rakitsch_2016	rs6581889	monocytes	0.003927908380364	0.23567450282184
LYZ	rs10784774	chr12_69344099_A_G	monocytes naive	F48_PEER_integrated	1081	18383	19	193	Rakitsch_2016	rs6581889	monocytes	0.0193001948290948	1
LYZ	rs10784774	chr12_69344099_A_G	monocytes naive	F27_PEER_separate_CL_0002057_naive	964	18383	18	193	Rakitsch_2016	rs6581889	monocytes	0.0129865721323028	0.779194327938166
LYZ	rs10784774	chr12_69344099_A_G	monocytes naive	F49_PEER_integrated	983	18383	20	193	Rakitsch_2016	rs6581889	monocytes	0.00357036913176569	0.214222147905941
LYZ	rs10784774	chr12_69344099_A_G	monocytes naive	F38_PEER_integrated	1070	18383	15	193	Rakitsch_2016	rs6581889	monocytes	0.155864210077913	1
LYZ	rs10784774	chr12_69344099_A_G	monocytes naive	F32_PEER_integrated	1026	18383	23	193	Rakitsch_2016	rs6581889	monocytes	0.000490814195381567	0.029448851722894
LYZ	rs10784774	chr12_69344099_A_G	monocytes naive	MEfloralwhite_WGCNA_integrated	52	18383	1	193	Rakitsch_2016	rs6581889	monocytes	0.422814767885351	1
LYZ	rs10784774	chr12_69344099_A_G	monocytes naive	X5.LU_EZH2_TARGETS_DN_PLIER_integrated	321	18383	9	193	Rakitsch_2016	rs6581889	monocytes	0.00696943295585842	0.418165977351505
LYZ	rs10784774	chr12_69344099_A_G	monocytes naive	F33_PEER_integrated	951	18383	10	193	Rakitsch_2016	rs6581889	monocytes	0.544036985614615	1
LYZ	rs10784774	chr12_69344099_A_G	monocytes naive	X16.LU_EZH2_TARGETS_DN_PLIER_separate_CL_0002057_naive	265	18383	7	193	Rakitsch_2016	rs6581889	monocytes	0.0221106127470013	1
LYZ	rs10784774	chr12_69344099_A_G	monocytes naive	IC86_ICA_integrated	309	18383	7	193	Rakitsch_2016	rs6581889	monocytes	0.0449782411876155	1
LYZ	rs10784774	chr12_69344099_A_G	monocytes naive	X32.CHEN_ETV5_TARGETS_TESTIS_PLIER_integrated	383	18383	5	193	Rakitsch_2016	rs6581889	monocytes	0.375310687703169	1
LYZ	rs10784774	chr12_69344099_A_G	monocytes naive	IC6_ICA_separate_CL_0002057_naive	379	18383	8	193	Rakitsch_2016	rs6581889	monocytes	0.0471403270042682	1
LYZ	rs10784774	chr12_69344099_A_G	monocytes naive	IC10_ICA_separate_CL_0002057_naive	390	18383	7	193	Rakitsch_2016	rs6581889	monocytes	0.117412194230022	1
LYZ	rs10784774	chr12_69344099_A_G	monocytes naive	F17_PEER_separate_CL_0002057_naive	973	18383	19	193	Rakitsch_2016	rs6581889	monocytes	0.00689234454732553	0.413540672839532
LYZ	rs10784774	chr12_69344099_A_G	monocytes naive	Cluster_958_funcExplorer_separate_CL_0002057_naive	658	18383	16	193	Rakitsch_2016	rs6581889	monocytes	0.0016060850861685	0.0963651051701097
LYZ	rs10784774	chr12_69344099_A_G	monocytes naive	F47_PEER_integrated	987	18383	12	193	Rakitsch_2016	rs6581889	monocytes	0.342531332635419	1
LYZ	rs10784774	chr12_69344099_A_G	monocytes naive	F39_PEER_integrated	916	18383	14	193	Rakitsch_2016	rs6581889	monocytes	0.102509635971468	1
LYZ	rs10784774	chr12_69344099_A_G	monocytes naive	F23_PEER_separate_CL_0002057_naive	948	18383	18	193	Rakitsch_2016	rs6581889	monocytes	0.0110907134252366	0.665442805514197
LYZ	rs10784774	chr12_69344099_A_G	monocytes naive	F41_PEER_integrated	933	18383	15	193	Rakitsch_2016	rs6581889	monocytes	0.0669951036230789	1
LYZ	rs10784774	chr12_69344099_A_G	monocytes naive	MEsalmon_WGCNA_integrated	256	18383	5	193	Rakitsch_2016	rs6581889	monocytes	0.13286230617084	1
LYZ	rs10784774	chr12_69344099_A_G	monocytes naive	MEgreen_WGCNA_separate_CL_0002057_naive	250	18383	9	193	Rakitsch_2016	rs6581889	monocytes	0.00133674197234862	0.0802045183409175
LYZ	rs10784774	chr12_69344099_A_G	monocytes naive	F47_PEER_separate_CL_0002057_naive	887	18383	13	33	Rotival_2011	rs11177644	monocytes	1.64292838783974e-09	9.85757032703847e-08
LYZ	rs10784774	chr12_69344099_A_G	monocytes naive	F29_PEER_integrated	1018	18383	14	33	Rotival_2011	rs11177644	monocytes	7.10735345528615e-10	4.26441207317169e-08
LYZ	rs10784774	chr12_69344099_A_G	monocytes naive	F16_PEER_separate_CL_0002057_naive	1099	18383	18	33	Rotival_2011	rs11177644	monocytes	3.66152301289293e-14	2.19691380773576e-12
LYZ	rs10784774	chr12_69344099_A_G	monocytes naive	IC152_ICA_integrated	398	18383	2	33	Rotival_2011	rs11177644	monocytes	0.159632545375028	1
LYZ	rs10784774	chr12_69344099_A_G	monocytes naive	X42.GSE29617_CTRL_VS_DAY3_TIV_FLU_VACCINE_PBMC_2008_UP_PLIER_integrated	851	18383	3	33	Rotival_2011	rs11177644	monocytes	0.195078716082153	1
LYZ	rs10784774	chr12_69344099_A_G	monocytes naive	IC20_ICA_integrated	825	18383	13	33	Rotival_2011	rs11177644	monocytes	6.79089062066253e-10	4.07453437239752e-08
LYZ	rs10784774	chr12_69344099_A_G	monocytes naive	F40_PEER_integrated	1054	18383	10	33	Rotival_2011	rs11177644	monocytes	1.01371710650257e-05	0.000608230263901545
LYZ	rs10784774	chr12_69344099_A_G	monocytes naive	F21_PEER_integrated	973	18383	8	33	Rotival_2011	rs11177644	monocytes	0.000254106033483722	0.0152463620090233
LYZ	rs10784774	chr12_69344099_A_G	monocytes naive	F29_PEER_separate_CL_0002057_naive	854	18383	17	33	Rotival_2011	rs11177644	monocytes	1.08344736085161e-14	6.50068416510967e-13
LYZ	rs10784774	chr12_69344099_A_G	monocytes naive	F48_PEER_integrated	1081	18383	11	33	Rotival_2011	rs11177644	monocytes	1.61158428216511e-06	9.66950569299068e-05
LYZ	rs10784774	chr12_69344099_A_G	monocytes naive	F27_PEER_separate_CL_0002057_naive	964	18383	14	33	Rotival_2011	rs11177644	monocytes	3.48214274223646e-10	2.08928564534188e-08
LYZ	rs10784774	chr12_69344099_A_G	monocytes naive	F49_PEER_integrated	983	18383	3	33	Rotival_2011	rs11177644	monocytes	0.258028485319186	1
LYZ	rs10784774	chr12_69344099_A_G	monocytes naive	F38_PEER_integrated	1070	18383	3	33	Rotival_2011	rs11177644	monocytes	0.301126499278319	1
LYZ	rs10784774	chr12_69344099_A_G	monocytes naive	F32_PEER_integrated	1026	18383	18	33	Rotival_2011	rs11177644	monocytes	1.1165593870589e-14	6.6993563223534e-13
LYZ	rs10784774	chr12_69344099_A_G	monocytes naive	MEfloralwhite_WGCNA_integrated	52	18383	0	33	Rotival_2011	rs11177644	monocytes	1	1
LYZ	rs10784774	chr12_69344099_A_G	monocytes naive	X5.LU_EZH2_TARGETS_DN_PLIER_integrated	321	18383	18	33	Rotival_2011	rs11177644	monocytes	1.1575936413139e-23	6.94556184788341e-22
LYZ	rs10784774	chr12_69344099_A_G	monocytes naive	F33_PEER_integrated	951	18383	4	33	Rotival_2011	rs11177644	monocytes	0.0888437447752411	1
LYZ	rs10784774	chr12_69344099_A_G	monocytes naive	X16.LU_EZH2_TARGETS_DN_PLIER_separate_CL_0002057_naive	265	18383	18	33	Rotival_2011	rs11177644	monocytes	3.45455388743243e-25	2.07273233245946e-23
LYZ	rs10784774	chr12_69344099_A_G	monocytes naive	IC86_ICA_integrated	309	18383	20	33	Rotival_2011	rs11177644	monocytes	8.23182614714993e-28	4.93909568828996e-26
LYZ	rs10784774	chr12_69344099_A_G	monocytes naive	X32.CHEN_ETV5_TARGETS_TESTIS_PLIER_integrated	383	18383	5	33	Rotival_2011	rs11177644	monocytes	0.00056134990117942	0.0336809940707652
LYZ	rs10784774	chr12_69344099_A_G	monocytes naive	IC6_ICA_separate_CL_0002057_naive	379	18383	14	33	Rotival_2011	rs11177644	monocytes	1.13369213882131e-15	6.80215283292785e-14
LYZ	rs10784774	chr12_69344099_A_G	monocytes naive	IC10_ICA_separate_CL_0002057_naive	390	18383	20	33	Rotival_2011	rs11177644	monocytes	9.35705658005517e-26	5.6142339480331e-24
LYZ	rs10784774	chr12_69344099_A_G	monocytes naive	F17_PEER_separate_CL_0002057_naive	973	18383	20	33	Rotival_2011	rs11177644	monocytes	7.33257541278035e-18	4.39954524766821e-16
LYZ	rs10784774	chr12_69344099_A_G	monocytes naive	Cluster_958_funcExplorer_separate_CL_0002057_naive	658	18383	10	33	Rotival_2011	rs11177644	monocytes	1.41607023023626e-07	8.49642138141757e-06
LYZ	rs10784774	chr12_69344099_A_G	monocytes naive	F47_PEER_integrated	987	18383	12	33	Rotival_2011	rs11177644	monocytes	6.67374082899477e-08	4.00424449739686e-06
LYZ	rs10784774	chr12_69344099_A_G	monocytes naive	F39_PEER_integrated	916	18383	14	33	Rotival_2011	rs11177644	monocytes	1.77898333411889e-10	1.06739000047134e-08
LYZ	rs10784774	chr12_69344099_A_G	monocytes naive	F23_PEER_separate_CL_0002057_naive	948	18383	15	33	Rotival_2011	rs11177644	monocytes	1.88339174345585e-11	1.13003504607351e-09
LYZ	rs10784774	chr12_69344099_A_G	monocytes naive	F41_PEER_integrated	933	18383	7	33	Rotival_2011	rs11177644	monocytes	0.00113547241814454	0.0681283450886725
LYZ	rs10784774	chr12_69344099_A_G	monocytes naive	MEsalmon_WGCNA_integrated	256	18383	17	33	Rotival_2011	rs11177644	monocytes	1.56110410073762e-23	9.36662460442574e-22
LYZ	rs10784774	chr12_69344099_A_G	monocytes naive	MEgreen_WGCNA_separate_CL_0002057_naive	250	18383	19	33	Rotival_2011	rs11177644	monocytes	1.19233679293429e-27	7.15402075760575e-26

## Sheet: Field_descriptions
Field	Description
locus	Name of the locus for what the replication was evaluated
rs_id	Rs-id of the locus
meta_id	Unique identifier for lead trans-eQTL we use as represenative for the locus (of form "chromosome_position_ref_alt")
context	Cell_type/condition we had association
cl_id	Module identifier that was associated with the locus
cl_size	Number of genes in the module
domain_size	Number of protein coding genes with unique Ensembl ID in our data
overlap_size	Number of genes that overlap between the module and replication trans genes
repl_set_size	Number of trans-genes reported by the replication study
study	Name of the replication study
repl_rs_id	Rs-id reported in the replication study
replication_context	Condition where replication study reported the association
fisher_pval	Fisher's p-value for the significance of the overlap
adj_fisher_pval	Bonferroni adjusted Fisher's p-value per locus
